# Supplementary material for: Identification of Novel Endogenous Controls for qPCR Normalization in SK-BR-3 Breast Cancer Cell Line
Source: MDPI journal article supplement (doi:10.3390/genes12101631), 2021-10-17
Supplement: s1 [file s1]

# **APPENDIX - 1**

## **DESCRIPTION OF ALGORITHMS**

Identification of novel endogenous controls for qPCR normalization in SK-BR-3  
breast cancer cell line

Authors: Nityanand Jain\*, Ingrida Mitre, Dina Nitisa, Valdis Pirsko and Inese Cakstina\*

**\* For Correspondence:**

Laboratory of Molecular Genetics  
Institute of Oncology  
Riga Stradins University  
16 Dzirciema street  
Riga  
Latvia (LV-1007)

**Email:** nityapkl@gmail.com (NJ); inese.cakstina@rsu.lv (IC)

**Additional Table 1.** Description and criteria for different algorithms/approaches used in the present study to determine most stable reference gene pair

| Algorithm/<br>Approach           | Criteria                                                                                                                        | Notes                                                                                                                                                                                                                                                                                        | Reference |
|----------------------------------|---------------------------------------------------------------------------------------------------------------------------------|----------------------------------------------------------------------------------------------------------------------------------------------------------------------------------------------------------------------------------------------------------------------------------------------|-----------|
| Coefficient of<br>Variance (CV%) | Homogenous sample CV < 25% and Heterogenous sample CV < 50%                                                                     | Also known as Relative Standard Deviation, is calculated as the ratio of the standard deviation and mean of linear Cq values ( $2^{-Cq}$ ). A lower CV% indicates higher gene expression stability and visa versa.                                                                           | 1,2,3     |
| NormFinder                       | Lower the group standard deviation, higher the expression stability of the gene                                                 | Estimates the overall variation in gene expression for each gene and delivers a stability value that identifies not only the most stable gene but also the best control gene. Stability of gene is presented as an estimate of combined intra- and inter-group variation of individual gene. | 4         |
| geNorm                           | Lower the M value, more stable the gene;<br>M < 1 for heterogenous tissue like breast cancer                                    | Calculates M value for each candidate gene based on pairwise comparisons. Uses stepwise exclusion method of the least stable genes by calculating average M values.                                                                                                                          | 5         |
|                                  | $V_n/V_{n+1} < 0.15$                                                                                                            | geNorm can also estimate optimal number of genes required for accurate normalization of expression data. $V_n$ represents the number of genes suitable for normalization. However, in case $V_n = 2$ , it is recommended to consider three stable internal controls.                         |           |
| BestKeeper                       | Any of three criteria:<br>1) $S.D \pm C.P \leq 1$<br>2) $S.D. \pm x\text{-fold} \leq 2$<br>3) High coefficient of correlation r | Analyzes the expression stability of reference genes using crossing points (C.P) to decide whether the genes are differentially expressed under the applied conditions or not.                                                                                                               | 6         |

|                          |                                                                           |                                                                                                                                                                                                                                                                                                                                                                                                                                                                                                                                                                                          |   |
|--------------------------|---------------------------------------------------------------------------|------------------------------------------------------------------------------------------------------------------------------------------------------------------------------------------------------------------------------------------------------------------------------------------------------------------------------------------------------------------------------------------------------------------------------------------------------------------------------------------------------------------------------------------------------------------------------------------|---|
| Comparative $\Delta C_t$ | Lower the standard deviation, higher the expression stability of the gene | Compares the relative expression of pairs of candidate reference genes within each sample to identify and rank the most stable genes. For a stable gene, it should be strongly expressed, displays minimum fluctuations and is independent of expression of other genes.<br><br>Further, if $\Delta C_q$ values of two genes fluctuate when analyzed in different samples, it can be concluded that one or both genes are variably expressed. Conversely, if the $\Delta C_q$ values remain constant, then both genes are either expressed stably or are co-regulated among the samples. | 7 |
| RefFinder                | Lower the geometric mean, the higher the expression stability of the gene | Measures geometric mean of attributed weights by NormFinder, geNorm, BestKeeper and Comparative $\Delta C_t$ to generate an overall final ranking.                                                                                                                                                                                                                                                                                                                                                                                                                                       | 8 |

---

## References

1. Venkat K.S, Nirmal K.S., Charbel M., Julien G. Optimal Use of statistical methods to validate reference gene stability in longitudinal studies. *Plos One*. 2019. 14(7): e0219440.
2. Jan Hellemans, Geert Mortier, Anne De Paepe, Frank Speleman, Jo Vandesompele. qBase relative quantification framework and software for management and automated analysis of real-time quantitative PCR data. *Genome Biology*. 2007 Feb. 8(2): R19.
3. D'haene B., Hellemans J. The importance of quality control during qPCR data analysis. *Int. Drug Discov*. 2010; 18–24.
4. Andersen CL, Jensen JL, Orntoft TF. Normalization of real-time quantitative reverse transcription-PCR data: a model-based variance estimation approach to identify genes suited for normalization, applied to bladder and colon cancer data sets. *Cancer research*. 2004. 64:5245-5250.
5. Vandesompele J, De Preter K, Pattyn F, Poppe B, Van Roy N, et al. Accurate normalization of real time quantitative RT-PCR data by geometric averaging of multiple internal control genes. *Genome Biol* 3: Research0034. 2002.
6. Pfaffl MW, Tichopad A, Prgomet C, Neuvians TP. Determination of stable housekeeping genes, differentially regulated target genes and sample integrity: BestKeeper--Excel-based tool using pair-wise correlations. *Biotechnology letters*. 2004. 26:509-515.
7. Silver N, Best S, Jiang J, Thein SL. Selection of housekeeping genes for gene expression studies in human reticulocytes using real-time PCR. *BMC molecular biology*. 2006. 7:33.
8. F Xie, P Xiao, D Chen, L Xu, B Zhang. miRDeepFinder: a miRNA analysis tool for deep sequencing of plant small RNAs. *Plant molecular biology*. 2012. 80 (1), 75-84.
