# Supplementary material for: Identification of Novel Endogenous Controls for qPCR Normalization in SK-BR-3 Breast Cancer Cell Line
Source: MDPI journal article supplement (doi:10.3390/genes12101631), 2021-10-17
Supplement: s1 [file s1]

## **SUPPLEMENTARY FILE S2**

### **GENE ONTOLOGY**

Identification of novel endogenous controls for qPCR normalization in SK-BR-3  
breast cancer cell line

Authors: Nityanand Jain\*, Ingrida Mitre, Dina Nitisa, Valdis Pirsko and Inese Cakstina\*

**\* For Correspondence:**

Laboratory of Molecular Genetics  
Institute of Oncology  
Riga Stradins University  
16 Dzirciema street  
Riga  
Latvia (LV-1007)

**Email:** nityapkl@gmail.com (NJ); inese.cakstina-dzerve@rsu.lv (IC)

#### **INDEX**

- 1) Additional Table 1 – Molecular Function (Gene Ontology) Analysis
- 2) Additional Table 2 – Cellular Component (Gene Ontology) Analysis
- 3) Additional Table 3 – Panther Functional Classification Analysis

**Additional Table 1.** Gene Ontology of Candidate Reference Genes ranked based on Fold Enrichment (Molecular Function)

| GO ID                                                                                         | GO Term                          | No. of genes | Fold Enrichment | Raw P value | FDR      |
|-----------------------------------------------------------------------------------------------|----------------------------------|--------------|-----------------|-------------|----------|
| GO:0031625                                                                                    | Ubiquitin protein ligase binding | 5            | 15.16 (+)       | 1.72E-05    | 2.74E-02 |
| <i>Genes: RBX1, TUBA1B, HSPCB, UBC, GABARAP</i>                                               |                                  |              |                 |             |          |
| GO:0003723                                                                                    | RNA binding                      | 12           | 6.43 (+)        | 4.38E-08    | 2.31E-04 |
| <i>Genes: SF3A1, TUBA1B, PUM1, HSPCB, RPL13A, TPT1, HNRNPL, PFN1, UBC, EIF5A, PPIA, PCBP1</i> |                                  |              |                 |             |          |
| GO:0008092                                                                                    | Cytoskeletal protein binding     | 7            | 6.36 (+)        | 7.30E-05    | 4.98E-02 |
| <i>Genes: ACTB, GAPDH, HSPCB, PFN1, CFL1, CCSER2, GABARAP</i>                                 |                                  |              |                 |             |          |

No. of genes indicates the number of genes from the input selected candidate reference genes that are represented by the respective GO term. (+) indicates statistically significant over-representation of the GO term in the selected reference genes.

**Notes:**

- 1) Blue GO term indicates the most enriched molecular function while red GO term indicates the most significant molecular function.

**Additional Table 2.** Gene Ontology of Candidate Reference Genes ranked based on Fold Enrichment (Cellular Component)

| GO ID                                                                                                                       | GO Term                   | No. of genes | Fold Enrichment | Raw P value | FDR      |
|-----------------------------------------------------------------------------------------------------------------------------|---------------------------|--------------|-----------------|-------------|----------|
| GO: 0097452                                                                                                                 | GAIT complex              | 2            | > 100 (+)       | 1.74E-05    | 3.84E-03 |
| <i>Genes: GAPDH, RPL13A</i>                                                                                                 |                           |              |                 |             |          |
| GO:0035770                                                                                                                  | Ribonucleoprotein granule | 4            | 14.56 (+)       | 1.56E-04    | 2.60E-02 |
| <i>Genes: ACTB, PUM1, HNRNPL, PCBP1</i>                                                                                     |                           |              |                 |             |          |
| GO:0005925                                                                                                                  | Focal adhesion            | 6            | 13.04 (+)       | 5.04E-06    | 1.68E-03 |
| <i>Genes: ACTB, RPL13A, PFN1, CFL1, BSG, PPIA</i>                                                                           |                           |              |                 |             |          |
| GO:0070062                                                                                                                  | Extracellular exosome     | 14           | 6.05 (+)        | 3.82E-09    | 7.66E-06 |
| <i>Genes: ACTB, GAPDH, HSPCB, TPT1, HNRNPL, PFN1, PGK1, UBC, BSG, CFL1, NACA, PPIA, PSMB4, PCBP1</i>                        |                           |              |                 |             |          |
| GO:0005829                                                                                                                  | Cytosol                   | 16           | 2.73 (+)        | 1.14E-05    | 2.85E-03 |
| <i>Genes: GAPDH, RPL13A, RBX1, ACTB, PUM1, GABARAP, EIF5A, HSPCB, TPT1, PFN1, PGK1, UBC, CFL1, PPIA, PSMB4, PCBP1</i>       |                           |              |                 |             |          |
| GO:0005634                                                                                                                  | Nucleus                   | 17           | 2.03 (+)        | 3.21E-04    | 4.92E-02 |
| <i>Genes: GAPDH, RPL13A, RBX1, SF3A1, ACTB, PUM1, EIF5A, HSPCB, TPT1, HNRNPL, PFN1, UBC, CFL1, NACA, PPIA, PSMB4, PCBP1</i> |                           |              |                 |             |          |

No. of genes indicates the number of genes from the input selected candidate reference genes that are represented by the respective GO term. (+) indicates statistically significant over-representation of the GO term in the selected reference genes.

**Notes:**

- 1) Blue GO term indicates the most enriched cellular component while red GO term indicates the most significant cellular component.

**Additional Table 3.** Panther Functional Classification Analysis (Supplement to Figure 2)

| Class/Pathway                      | Number of Genes | Genes Included                                                                                                              |
|------------------------------------|-----------------|-----------------------------------------------------------------------------------------------------------------------------|
| <b><i>Biological Process</i></b>   |                 |                                                                                                                             |
| Cellular process                   | 17              | <i>BSG, CFL1, DAD1, EIF5A, GABARAP, HNRNPL, HSP90AB1, NACA, PFN1, PGK1, PSMB4, PUM1, RPL13A, RBX1, SF3A1, TUBA1B, UBC</i>   |
| Metabolic process                  | 11              | <i>DAD1, EIF5A, GAPDH, GABARAP, HNRNPL, PCBP1, PGK1, PUM1, RBX1, SF3A1, UBC</i>                                             |
| Biological regulation              | 8               | <i>EIF5A, HSP90AB1, PCBP1, PFN1, PGK1, PUM1, RPL13A, SF3A1</i>                                                              |
| Response to stimulus               | 3               | <i>BSG, HSP90AB1, GABARAP</i>                                                                                               |
| Developmental process              | 2               | <i>BSG, PGK1</i>                                                                                                            |
| Localization                       | 2               | <i>CFL1, NACA</i>                                                                                                           |
| Locomotion                         | 2               | <i>BSG, CFL1</i>                                                                                                            |
| Multicellular organismal process   | 2               | <i>BSG, HSP90AB1</i>                                                                                                        |
| Biological adhesion                | 1               | <i>BSG</i>                                                                                                                  |
| <b><i>Molecular Function</i></b>   |                 |                                                                                                                             |
| Binding                            | 16              | <i>BSG, CFL1, EIF5A, GABARAP, HSP90AB1, NACA, PFN1, PGK1, PSMB4, PUM1, RPL13A, RBX1, SF3A1, TPT1, TUBA1B, UBC</i>           |
| Catalytic activity                 | 5               | <i>DAD1, GAPDH, PGK1, PSMB4, RBX1</i>                                                                                       |
| Structural molecular activity      | 3               | <i>ATCB, RPL13A, TUBA1B</i>                                                                                                 |
| Translational regulator activity   | 1               | <i>EIF5A</i>                                                                                                                |
| <b><i>Cellular Compartment</i></b> |                 |                                                                                                                             |
| Cell and cell part                 | 17              | <i>BSG1, CFL1, DAD1, GABARAP, GAPDH, HNRNPL, HSP90AB1, PFN1, PGK1, PPIA, PSMB4, PUM1, RBX1, RPL13A, SF3A1, TPT1, TUBA1B</i> |
| Organelle                          | 10              | <i>CFL1, DAD1, GABARAP, HNRNPL, PCBP1, PPIA, RBX1, RPL13A, SF3A1, UBC</i>                                                   |
| Organelle part                     | 7               | <i>CFL1, DAD1, GABARAP, PCBP1, PSMB4, RBX1, TUBA1B</i>                                                                      |
| Protein-containing complex         | 6               | <i>CFL1, DAD1, PSMB4, RPL13A, RBX1, SF3A1</i>                                                                               |
| Membrane                           | 5               | <i>ACTB, BSG, DAD1, GABARAP, HSP90AB1</i>                                                                                   |
| Membrane-part                      | 3               | <i>ACTB, CFL1, TUBA1B</i>                                                                                                   |
| Supramolecular complex             | 2               | <i>TUBA1B, HSP90AB1</i>                                                                                                     |
| Membrane-enclosed lumen            | 1               | <i>PCBP1</i>                                                                                                                |

| <i><b>Protein Class</b></i>                                |   |                                                |
|------------------------------------------------------------|---|------------------------------------------------|
| Cytoskeletal protein                                       | 6 | <i>ACTB, CFL1, GABARAP, PFN1, TPT1, TUBA1B</i> |
| Metabolite interconversion enzyme                          | 3 | <i>DAD1, GAPDH, PGK1</i>                       |
| Nucleic acid binding protein                               | 3 | <i>PCBP1, PUM1, SF3A1</i>                      |
| Translational protein                                      | 2 | <i>EIF5A, RPL13A</i>                           |
| Chaperone                                                  | 1 | <i>HSP90AB1</i>                                |
| Gene-specific transcriptional regulator                    | 1 | <i>NACA</i>                                    |
| Protein modifying enzyme                                   | 1 | <i>RBX1</i>                                    |
| Scaffold/adaptor protein                                   | 1 | <i>BSG</i>                                     |
| <i><b>Pathway</b></i>                                      |   |                                                |
| Cytoskeletal regulation by Rho GTPase                      | 3 | <i>ACTB, CFL1, PFN1</i>                        |
| Glycolysis                                                 | 2 | <i>GAPDH, PGK1</i>                             |
| Huntington disease                                         | 2 | <i>ACTB, GAPDH</i>                             |
| Alzheimer disease-presenilin                               | 1 | <i>ACTB</i>                                    |
| Cadherin signalling                                        | 1 | <i>ACTB</i>                                    |
| Gonadotropin releasing hormone receptor                    | 1 | <i>TUBA1B</i>                                  |
| Inflammation mediated by chemokine and cytokine signalling | 1 | <i>ACTB</i>                                    |
| Integrin signalling                                        | 1 | <i>ACTB</i>                                    |
| Nicotine acetylcholine receptor signalling                 | 1 | <i>ACTB</i>                                    |
| Parkinson disease                                          | 1 | <i>PSMB4</i>                                   |
| Wnt Signalling                                             | 1 | <i>ACTB</i>                                    |
