# Supplementary material for: Identification of Novel Endogenous Controls for qPCR Normalization in SK-BR-3 Breast Cancer Cell Line
Source: MDPI journal article supplement (doi:10.3390/genes12101631), 2021-10-17
Supplement: s1 [file s1]

## **SUPPLEMENTARY FILE S1**

### **PRIMER DESCRIPTION & EFFICIENCY**

Identification of novel endogenous controls for qPCR normalization in SK-BR-3  
breast cancer cell line

Authors: Nityanand Jain\*, Ingrida Mitre, Dina Nitisa, Valdis Pirsko and Inese Cakstina\*

**As Adapted and Modified from our Previous Study:**

Jain N, et al. Selecting suitable reference genes for qPCR normalization: a comprehensive analysis in MCF-7 breast cancer cell line. BMC Mol Cell Biol. 2020 Sep 25;21(1):68. doi: 10.1186/s12860-020-00313-x. PMID: 32977762; PMCID: PMC7519550.

**\* For Correspondence:**

Laboratory of Molecular Genetics  
Institute of Oncology  
Riga Stradins University  
16 Dzirciema street  
Riga  
Latvia (LV-1007)

**Email:** nityapkl@gmail.com (NJ); inese.cakstina@rsu.lv (IC)

## INDEX

- 1) Additional Table 1 – Description of selected reference genes and genes of interest
- 2) Additional Table 2 – Primer sequences of selected reference genes and genes of interest
- 3) Additional Table 3 – Primer efficiencies using Calibration (Standard) curve
- 4) Additional Figures 1-4 – Melting curves of reference genes and genes of interest
- 5) References

**Additional Table 1.** Description of the selected candidate reference genes and genes of interest

| Gene Symbol     | Gene Name                                 | Molecular Function                                                 | Accession Number | Chromosomal Localisation |
|-----------------|-------------------------------------------|--------------------------------------------------------------------|------------------|--------------------------|
| <i>ACTB</i>     | $\beta$ – Actin                           | Cytoskeleton<br>(Contractile apparatus)                            | NM_001101        | 7p22 – p12               |
| <i>GAPDH</i>    | Glyceraldehyde 3-phosphate dehydrogenase  | Glycolytic enzyme                                                  | NM_002046        | 12p13.31                 |
| <i>RPL13A</i>   | Ribosomal protein L13a                    | Ribosome subunit, translation                                      | NM_012423        | 19q13.33                 |
| <i>PGK1</i>     | Phosphoglycerate kinase 1                 | Glycolytic enzyme                                                  | NM_000291        | Xp21.1                   |
| <i>HSP90AB1</i> | Heat shock protein 90kDa beta             | Signal transduction, Protein folding                               | NM_007355        | 6p21.1                   |
| <i>RNA28S</i>   | 28S ribosomal RNA                         | Ribosome subunit, translation                                      | NR_003287        | Unknown                  |
| <i>RNA18S</i>   | 18S ribosomal RNA                         | Ribosome subunit, translation                                      | NR_003286        | Unknown                  |
| <i>PUM1</i>     | Pumilio RNA binding family member 1       | RNA binding protein encoding                                       | NM_001020658     | 1p35.2                   |
| <i>CCSER2</i>   | Coiled coil serine rich protein 2         | Microtubule binding protein encoding                               | NM_018999        | 10q23.1                  |
| <i>HNRNPL</i>   | Heterogeneous Nuclear Ribonucleoprotein L | Formation, processing & packaging of mRNA                          | NM_001005335     | 19q13.2                  |
| <i>PCBP1</i>    | Poly (rC) binding protein 1               | RNA binding protein encoding                                       | NM_006196        | 2p13.3                   |
| <i>SF3A1</i>    | Splicing factor 3a subunit 1              | Spliceosome assembly & pre-mRNA splicing                           | NM_005877        | 22q12.2                  |
| <i>DAD1</i>     | Defender against cell death 1             | Core component protein of multi-subunit oligosaccharyl-transferase | NM_001344        | 14q11.2                  |
| <i>PSMB4</i>    | Proteasome 20S subunit beta 4             | Proteolytic degradation of intracellular proteins                  | NM_002796        | 1q21.3                   |
| <i>BSG</i>      | Basigin (Ok blood group)                  | Targets monocarboxylate transporters to plasma membrane            | NM_001728        | 19p13.3                  |
| <i>TUBA1B</i>   | Tubulin alpha 1b                          | Microtubule protein                                                | NM_006082        | 12q13.12                 |
| <i>RBX1</i>     | Ring-box 1                                | Ubiquitin-protein transferase activity                             | NM_014248        | 22q13.2                  |

|                |                                                      |                                                                                     |              |             |
|----------------|------------------------------------------------------|-------------------------------------------------------------------------------------|--------------|-------------|
| <i>CFL1</i>    | Cofilin 1                                            | Regulates actin cytoskeleton dynamics, mitosis, cytokinesis                         | NM_005507    | 11q13.1     |
| <i>UBC</i>     | Ubiquitin C                                          | Ubiquitin protein ligase binding                                                    | NM_021009    | 12q24.3     |
| <i>PFN1</i>    | Profilin 1                                           | Actin binding, cytoskeletal functions                                               | NM_005022    | 17p13.2     |
| <i>EIF5A</i>   | Eukaryotic translation initiation factor 5A          | mRNA binding protein, translation elongation                                        | NM_001970    | 17p13.1     |
| <i>TPT1</i>    | Tumor protein, translationally-controlled 1          | Calcium binding, microtubule stabilization                                          | NM_001286272 | 13q14.13    |
| <i>NACA</i>    | Nascent polypeptide associated complex subunit alpha | Cardiac and muscle (myotubes) specific transcription factor                         | NM_005594    | 12q23-q24.1 |
| <i>PPIA</i>    | Peptidylprolyl isomerase A                           | Accelerates protein folding                                                         | NM_021130    | 7p13        |
| <i>GABARAP</i> | GABA type A receptor associated protein              | Ubiquitin like modifier, apoptosis, autophagy                                       | NM_007278    | 17p13.1     |
| <i>AURKA</i> * | Aurora Kinase A                                      | Mitotic centrosomal protein kinase (controls chromosome segregation during mitosis) | NM_003600    | 20q13.2     |
| <i>BUB1</i> *  | BUB1 mitotic checkpoint serine/ threonine kinase     | Spindle assembly checkpoint signaling; chromosome alignment                         | NM_004336    | 2q13        |
| <i>SNAIL</i> * | Snail family transcriptional repressor 1             | Induction of epithelial to mesenchymal transition (EMT)                             | NM_005985    | 20q13.13    |

---

\*Genes that were used as gene of interest for normalization by candidate reference genes.

**Additional Table 2.** Primers for the selected candidate genes and genes of interest

| Gene Symbol     | Primer Pair<br>(F - Forward; R – Reverse)                                   | Amplicon Length<br>(bp) | Annealing Temperature<br>(°C) | Primer Reference |
|-----------------|-----------------------------------------------------------------------------|-------------------------|-------------------------------|------------------|
| <i>ACTB</i>     | F: 5`- CACCATTGGCAATGAGCGGTTC - 3`<br>R: 5`- AGGTCTTTGCGGATGTCCACGT – 3`    | 135                     | 58                            | [1]              |
| <i>GAPDH</i>    | F: 5`- GACAGTCAGCCGCATCTTCT - 3`<br>R: 5`- TTAAAAGCAGCCCTGGTGAC - 3`        | 127                     | 58                            | [1]              |
| <i>RPL13A</i>   | F: 5`- CTATGACCAATAGGAAGAGCAACC - 3`<br>R: 5`- GCAGAGTATATGACCAGGTGGAA – 3` | 121                     | 58                            | [2]              |
| <i>PGK1</i>     | F: 5`- CTTAAGGTGCTCAACAACATGG - 3`<br>R: 5`- ACAGGCAAGGTAATCTTCACAC - 3`    | 119                     | 58                            | [3]              |
| <i>HSP90AB1</i> | F: 5`- CTCTGTCAGAGTATGTTTCTCGC - 3`<br>R: 5`- GTTCCGCACTCGCTCCACAAA - 3`    | 114                     | 58                            | [1]              |
| <i>RNA28S</i>   | F: 5`- CAGGGGAATCCGACTGTTTA - 3`<br>R: 5`- ATGACGAGGCATTTGGCTAC - 3`        | 174                     | 58                            | [3]              |
| <i>RNA18S</i>   | F: 5`- CGGCTACCACATCCAAGGAA - 3`<br>R: 5`- GCTGGAATTACCGCGGCT – 3`          | 187                     | 58                            | [4]              |
| <i>PUM1</i>     | F: 5`- AGTGGGGGACTAGGCGTTAG - 3`<br>R: 5`- GTTTTCATCACTGTCTGCATCC -3`       | 111                     | 58                            | [5]              |
| <i>CCSER2</i>   | F: 5`- GACAGGAGCATTACCACCTCAG - 3`<br>R: 5`- CTTCTGAGCCTGGAAAAAGGGC – 3`    | 143                     | 58                            | [6]              |
| <i>HNRNPL</i>   | F: 5`- ACAAACCCCAATCTCAGTGG - 3`<br>R: 5`- CCCTCATCATGGTAATGGCT – 3`        | 140                     | 58                            | [7]              |

|                      |                                                                               |     |    |               |
|----------------------|-------------------------------------------------------------------------------|-----|----|---------------|
| <b><i>PCBP1</i></b>  | F: 5` - TGATCATCGACAAGCTGGAG - 3`<br>R: 5` - TCTTTGATCTTACACCCGCC - 3`        | 145 | 58 | [7]           |
| <b><i>SF3A1</i></b>  | F: 5` - AAGGGTCCAGTGTCCATCAAAGT - 3`<br>R: 5` - GCCATGTTGTAGTAAGCCAGTGAG - 3` | 224 | 58 | [8]           |
| <b><i>DAD1</i></b>   | F: 5` - CAGTTCGGTTACTGTCTCCTCG - 3`<br>R: 5` - GGAGATGCCTTGGAATCCGCT - 3`     | 147 | 58 | Present Study |
| <b><i>PSMB4</i></b>  | F: 5` - CGTCCACTCCCGATTCTTC - 3`<br>R: 5` - AATGCGAGAGATGTTGCGGA - 3`         | 188 | 58 | Present Study |
| <b><i>BSG</i></b>    | F: 5` - GGCTGTGAAGTCGTCAGAACAC - 3`<br>R: 5` - ACCTGCTCTCGGAGCCGTTCA - 3`     | 149 | 58 | Present Study |
| <b><i>TUBA1B</i></b> | F: 5` - TGGAGGAAGGCGAGTTTTCA - 3`<br>R: 5` - GCAGGGCCAAAAGGAATGGAT - 3`       | 142 | 58 | Present Study |
| <b><i>RBX1</i></b>   | F: 5` - CCTCTGGGCCTGGGATATTG - 3`<br>R: 5` - TACAGACTCCCCATGCGACA - 3`        | 134 | 58 | Present Study |
| <b><i>CFL1</i></b>   | F: 5` - GCAACCTATGAGACCAAGGAGAG - 3`<br>R: 5` - TCTTGATGGCGTCCTTGGAGCT - 3`   | 118 | 58 | Present Study |
| <b><i>UBC</i></b>    | F: 5` - ACTCTGCACTTGGTCCTGC - 3`<br>R: 5` - GAATGCAACAACCTTTATTGAAAGGA - 3`   | 103 | 58 | Present Study |
| <b><i>PFN1</i></b>   | F: 5` - ACGTTCGTCAACATCACGCC - 3`<br>R: 5` - GAGTCCCGGATCACCGAACA - 3`        | 116 | 58 | Present Study |
| <b><i>EIF5A</i></b>  | F: 5` - CTTCACCTAGCTCCCTTGGC - 3`<br>R: 5` - TAAACCACAAGCAGCACCCA - 3`        | 123 | 58 | Present Study |

|                |                                                                             |     |    |               |
|----------------|-----------------------------------------------------------------------------|-----|----|---------------|
| <i>TPT1</i>    | F: 5` - GAGATCGCGGACGGGTTG - 3`<br>R: 5` - TTCAGCGGAGGCATTTCCAC - 3`        | 102 | 58 | Present Study |
| <i>NACA</i>    | F: 5` - ATTCCACCCAGGCAACCACACA - 3`<br>R: 5` - TGTAACCTGCCGAAGACCCAGT - 3`  | 143 | 58 | Present Study |
| <i>PPIA</i>    | F: 5` - ACTTCATCCTAAAGCATACGGGTC - 3`<br>R: 5` - CTCAGTCTTGGCAGTGCAGAT - 3` | 101 | 58 | Present Study |
| <i>GABARAP</i> | F: 5` - CTTGTGTTGCTCCCCTCGTC - 3`<br>R: 5` - TTGCAGACAGGGAAAAGCCC - 3`      | 153 | 58 | Present Study |
| <i>AURKA</i> * | F: 5'- GGAGCCTTGGAGTTCTTTGC - 3'<br>R: 5'- CCTGGCTCCCTCTGTTACAA - 3'        | 134 | 58 | [3]           |
| <i>BUB1</i> *  | F: 5` - GAGTGATATCTTCAGCTTGTG - 3`<br>R: 5` - AACAACTGCTCAACATCAAC - 3`     | 122 | 58 | [9]           |
| <i>SNAIL</i> * | F: 5'- ACTATGCCGCGCTCTTTCCT - 3'<br>R: 5' - GGTGGGGTTGAGGATCTCCG - 3'       | 162 | 58 | Present Study |

---

\*Genes that were used as gene of interest for normalization by candidate reference genes

## PRIMER EFFICIENCY CALCULATIONS

To calculate primer efficiency, the serial dilutions were performed twice using two different initial concentrations and two different log dilutions. The first serial dilution series was termed as “Broad Range” dilutions. The second serial dilution series was termed as “Narrow Range”. The concentrations and log scale dilutions are shown below (NTC – no template control):

| Broad Range   |                               |                    | Narrow Range  |                               |                    |
|---------------|-------------------------------|--------------------|---------------|-------------------------------|--------------------|
| Dilution Code | Concentration of cDNA (ng/ml) | Log scale dilution | Dilution Code | Concentration of cDNA (ng/ml) | Log Scale Dilution |
| B1            | 20                            | 1 : 1              | N1            | 50                            | 1 : 1              |
| B2            | 2                             | 1 : 10             | N2            | 10                            | 1 : 5              |
| B3            | 0.2                           | 1 : 100            | N3            | 5                             | 1 : 10             |
| B4            | 0.02                          | 1 : 1000           | N4            | 1                             | 1 : 50             |
| B5            | 0.002                         | 1 : 10,000         | N5            | 0.1                           | 1 : 500            |
| B6            | 0.0002                        | 1 : 100,000        | N6            | 0.05                          | 1 : 1000           |
| NTC           | NTC                           | NTC                | NTC           | NTC                           | NTC                |

As indicated in MIQE guidelines [10], the calibration curve (previously called as standard curve) was analyzed, which was prepared by plotting the log (cDNA conc) on x-axis against the Cq values on the y-axis. The samples were analyzed in triplicates for each dilution. The geomean (geometric mean) was used to estimate the “Central Cq” value from the triplicates. The geomean is a more accurate measure for averaging the Cq values than the normal mean/average because of the logarithmic nature of the Cq (as discussed in Additional file 3 (Extended Discussion) of our previous paper [3]).

The Slope, Amplification factor (E), Efficiency (F) and R<sup>2</sup> (coefficient of determination) for both series are shown in Additional Table 3 (next page). An efficiency of 100% (or amplification factor 2) symbolizes a perfect doubling of template cDNA (SK-BR-3) by the primer. R<sup>2</sup> represents how well the experimental data fit the regression line, that is how linear the data is. Linearity in turn gives a measure of the variability across assay replicates and whether the amplification efficiency is the same for different starting template copy numbers [11].

**Note:** The ideal recommended ranges for Efficiency (F) is from 90-110% while R<sup>2</sup> (coefficient of determination) is recommended to be  $\geq 0.9800$ .



**Additional Table 3.** Primer efficiencies for the reference genes and genes of interest using calibration curves and two different serial dilution series

| Gene<br>Symbol  | Broad Range |                             |                     |                | Narrow Range |                             |                     |                |
|-----------------|-------------|-----------------------------|---------------------|----------------|--------------|-----------------------------|---------------------|----------------|
|                 | Slope       | Amplification<br>factor (E) | Efficiency<br>% (F) | R <sup>2</sup> | Slope        | Amplification<br>factor (E) | Efficiency<br>% (F) | R <sup>2</sup> |
| <i>ACTB</i>     | -3.250      | 2.031                       | 103.09%             | 0.9997         | -3.249       | 2.031                       | 103.12%             | 0.9983         |
| <i>GAPDH</i>    | -3.535      | 1.918                       | 91.81%              | 0.9852         | -3.328       | 1.997                       | 99.73%              | 0.9983         |
| <i>RPL13A</i>   | -2.974      | 2.168                       | 116.89%             | 0.9984         | -3.299       | 2.009                       | 100.93%             | 0.9852         |
| <i>PGK1</i>     | -3.268      | 2.023                       | 102.23%             | 0.9973         | -3.104       | 2.099                       | 109.98%             | 0.9850         |
| <i>HSP90AB1</i> | -4.005      | 1.777                       | 77.70%              | 0.9780         | -3.137       | 2.083                       | 108.34%             | 0.9990         |
| <i>RNA28S</i>   | -3.553      | 1.912                       | 91.17%              | 0.9995         | -3.428       | 1.958                       | 95.76%              | 0.9847         |
| <i>RNA18S</i>   | -3.395      | 1.971                       | 97.05%              | 0.9979         | -3.187       | 2.056                       | 105.96%             | 0.9812         |
| <i>PUM1</i>     | -3.505      | 1.929                       | 92.89%              | 0.9946         | -3.218       | 2.045                       | 104.52%             | 0.9961         |
| <i>CCSER2</i>   | -2.178      | 2.876                       | 187.57%             | 0.9921         | -1.512       | 4.591                       | 359.05%             | 0.9518         |
| <i>HNRNPL</i>   | -3.158      | 2.073                       | 107.33%             | 0.9954         | -3.315       | 2.003                       | 100.28%             | 0.9819         |
| <i>PCBP1</i>    | -3.191      | 2.058                       | 105.78%             | 0.9927         | -3.316       | 2.004                       | 100.35%             | 0.9921         |
| <i>SF3A1</i>    | -3.453      | 1.948                       | 94.82%              | 0.9952         | -3.276       | 2.019                       | 101.95%             | 0.9815         |
| <i>DAD1</i>     | -3.297      | 2.011                       | 101.05%             | 0.9980         | -3.348       | 1.989                       | 98.93%              | 0.9880         |
| <i>PSMB4</i>    | -3.378      | 1.977                       | 97.73%              | 0.9983         | -3.268       | 2.023                       | 102.31%             | 0.9810         |
| <i>BSG</i>      | -3.409      | 1.965                       | 96.49%              | 0.9929         | -3.279       | 2.018                       | 101.78%             | 0.9919         |
| <i>TUBA1B</i>   | -3.405      | 1.966                       | 96.63%              | 0.9934         | -3.133       | 2.085                       | 108.54%             | 0.9802         |
| <i>RBX1</i>     | -3.392      | 1.971                       | 97.14%              | 0.9980         | -3.207       | 2.050                       | 105.04%             | 0.9931         |

|                |        |       |         |        |        |       |         |        |
|----------------|--------|-------|---------|--------|--------|-------|---------|--------|
| <i>CFL1</i>    | -3.174 | 2.066 | 106.55% | 0.9985 | -3.299 | 2.009 | 100.94% | 0.9955 |
| <i>UBC</i>     | -3.354 | 1.987 | 98.68%  | 0.9803 | -3.128 | 2.088 | 108.79% | 0.9971 |
| <i>PFN1</i>    | -3.266 | 2.024 | 102.41% | 0.9985 | -3.115 | 2.094 | 109.43% | 0.9864 |
| <i>EIF5A</i>   | -3.540 | 1.916 | 91.64%  | 0.9977 | -3.465 | 1.944 | 94.37%  | 0.9981 |
| <i>TPT1</i>    | -3.332 | 1.996 | 99.59%  | 0.9986 | -3.088 | 2.108 | 110.79% | 0.9913 |
| <i>NACA</i>    | -3.224 | 2.043 | 104.26% | 0.9996 | -3.065 | 2.119 | 111.99% | 0.9868 |
| <i>PPIA</i>    | -3.423 | 1.959 | 95.96%  | 0.9983 | -3.323 | 1.999 | 99.96%  | 0.9969 |
| <i>GABARAP</i> | -2.472 | 2.539 | 153.86% | 0.9964 | -1.444 | 4.929 | 392.85% | 0.9314 |
| <i>AURKA</i> * | -3.298 | 2.010 | 101.03% | 0.9980 | -3.370 | 1.980 | 98.04%  | 0.9869 |
| <i>BUB1</i> *  | -3.176 | 2.065 | 106.47% | 0.9994 | -3.342 | 1.992 | 99.18%  | 0.9882 |
| <i>SNAI1</i> * | -2.525 | 2.489 | 148.89% | 0.9944 | -3.112 | 2.096 | 109.57% | 0.9804 |

\*Genes that were used as gene of interest for normalization by candidate reference genes

#### Notes:

- 1) Some of the points amongst triplicates were removed only when they were identified and flagged by the ViiA 7 machine as definitive outliers/ no amplification/ experiment failed.
- 2) For *SF3A1*, *PUM1* and *AURKA* all the triplicates were “undetermined” for B6 dilution (broad range).
- 3) For *CCSER2* and *GABARAP*, the dilutions from B4-B6 (broad range) were removed while for *BUB1*, the dilutions from B5-B6 (broad range) and for *SNAI1*, dilutions from B6 (broad range) were removed from analysis due to flattening of curve and no change in Cq values.
- 4) For broad range series dilutions, *HSP90AB1* was outside the R<sup>2</sup> recommended limits while *CCSER2*, *GABARAP*, *RPL13A*, *HSP90AB1* and *SNAI1* were outside the Efficiency % recommended limits.
- 5) For narrow range series dilutions, *GABARAP* and *CCSER2* still remained outside the recommended Efficiency % limits and R<sup>2</sup> values while *TPT1* and *NACA* were marginally outside the recommended Efficiency % limits.

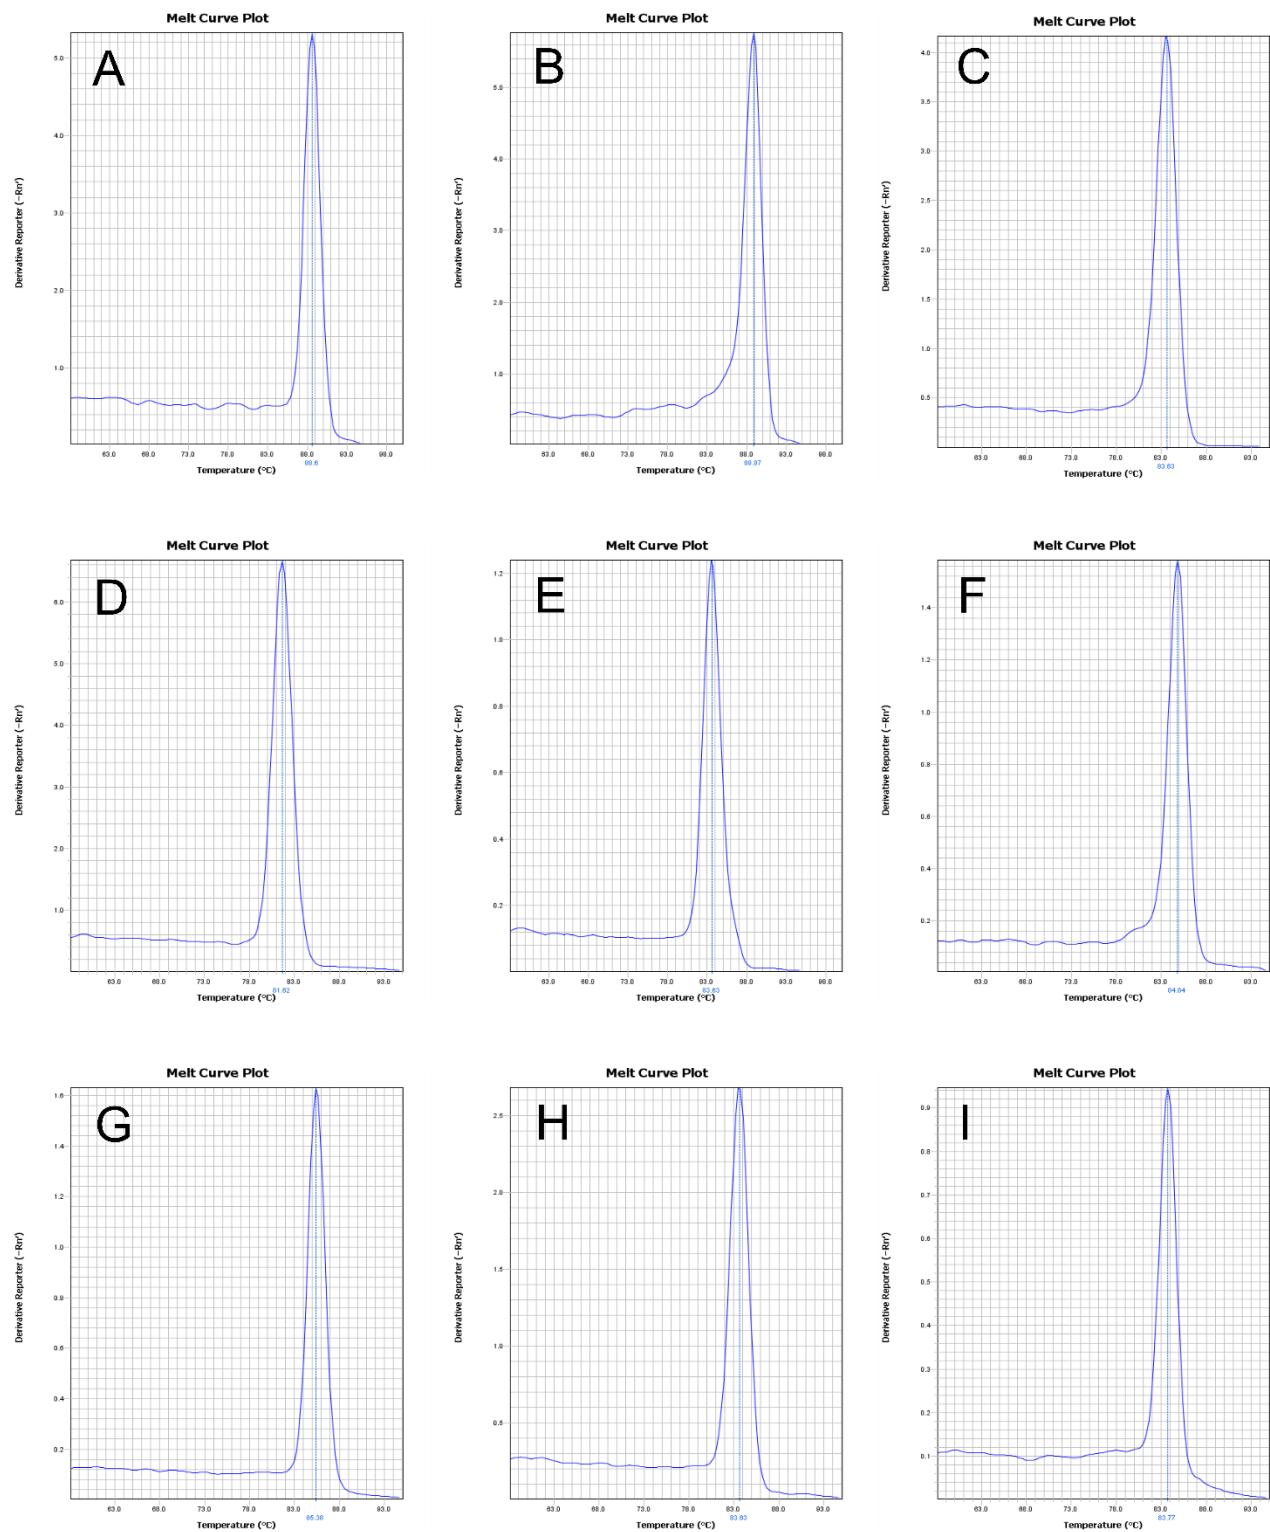

**Additional Figure 1.** The melting (dissociation) curve for the primers designed for the reference genes (**A**) *ACTB*; (**B**) *GAPDH*; (**C**) *RPL13A*; (**D**) *PGK1*; (**E**) *HSP90AB1*; (**F**) *RNA28S*; (**G**) *RNA18S*; (**H**) *PUM1* and (**I**) *CCSER2*. A single sharp amplicon peak indicates high amplification specificity of the primer pair.

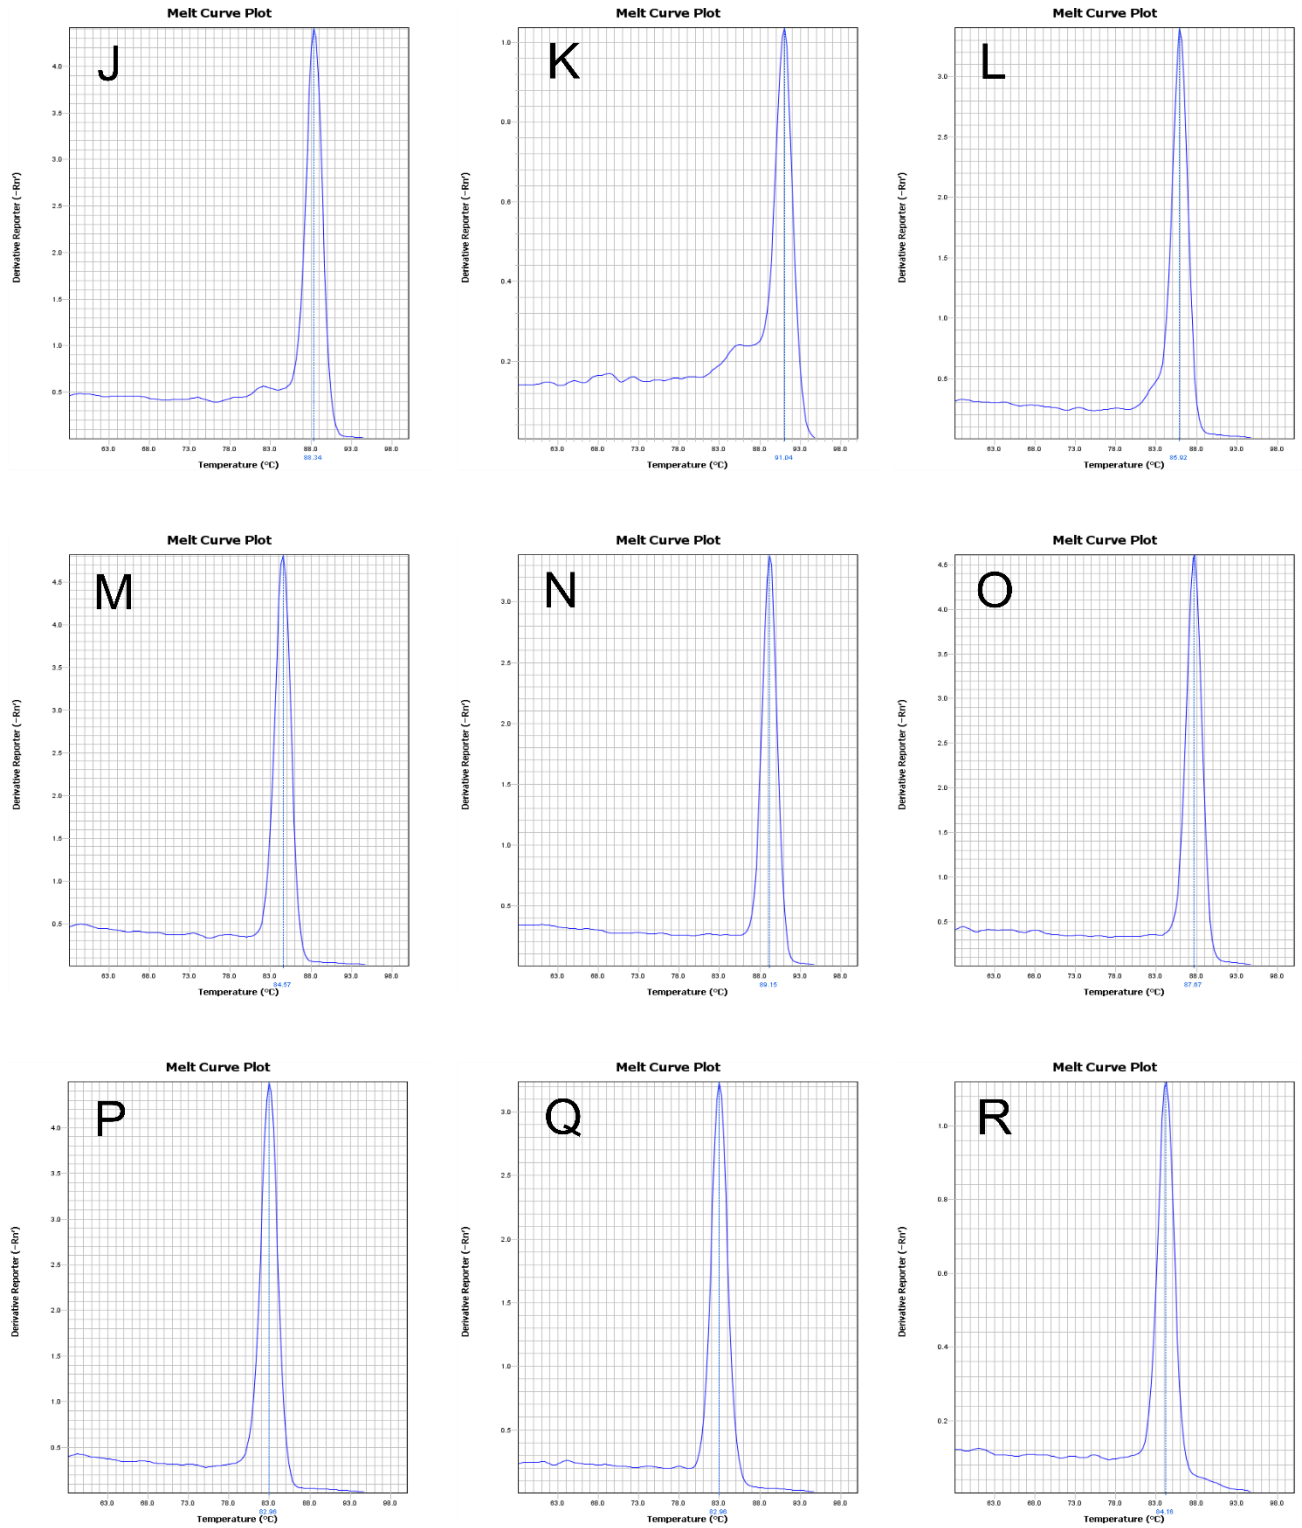

**Additional Figure 2.** The melting (dissociation) curve for the primers designed for the reference genes (**J**) *HNRNPL*; (**K**) *PCBP1*; (**L**) *SF3A1*; (**M**) *DAD1*; (**N**) *PSMB4*; (**O**) *BSG*; (**P**) *TUBA1B*; (**Q**) *RBX1* and (**R**) *CFL1*. A single sharp amplicon peak indicates high amplification specificity of the primer pair.

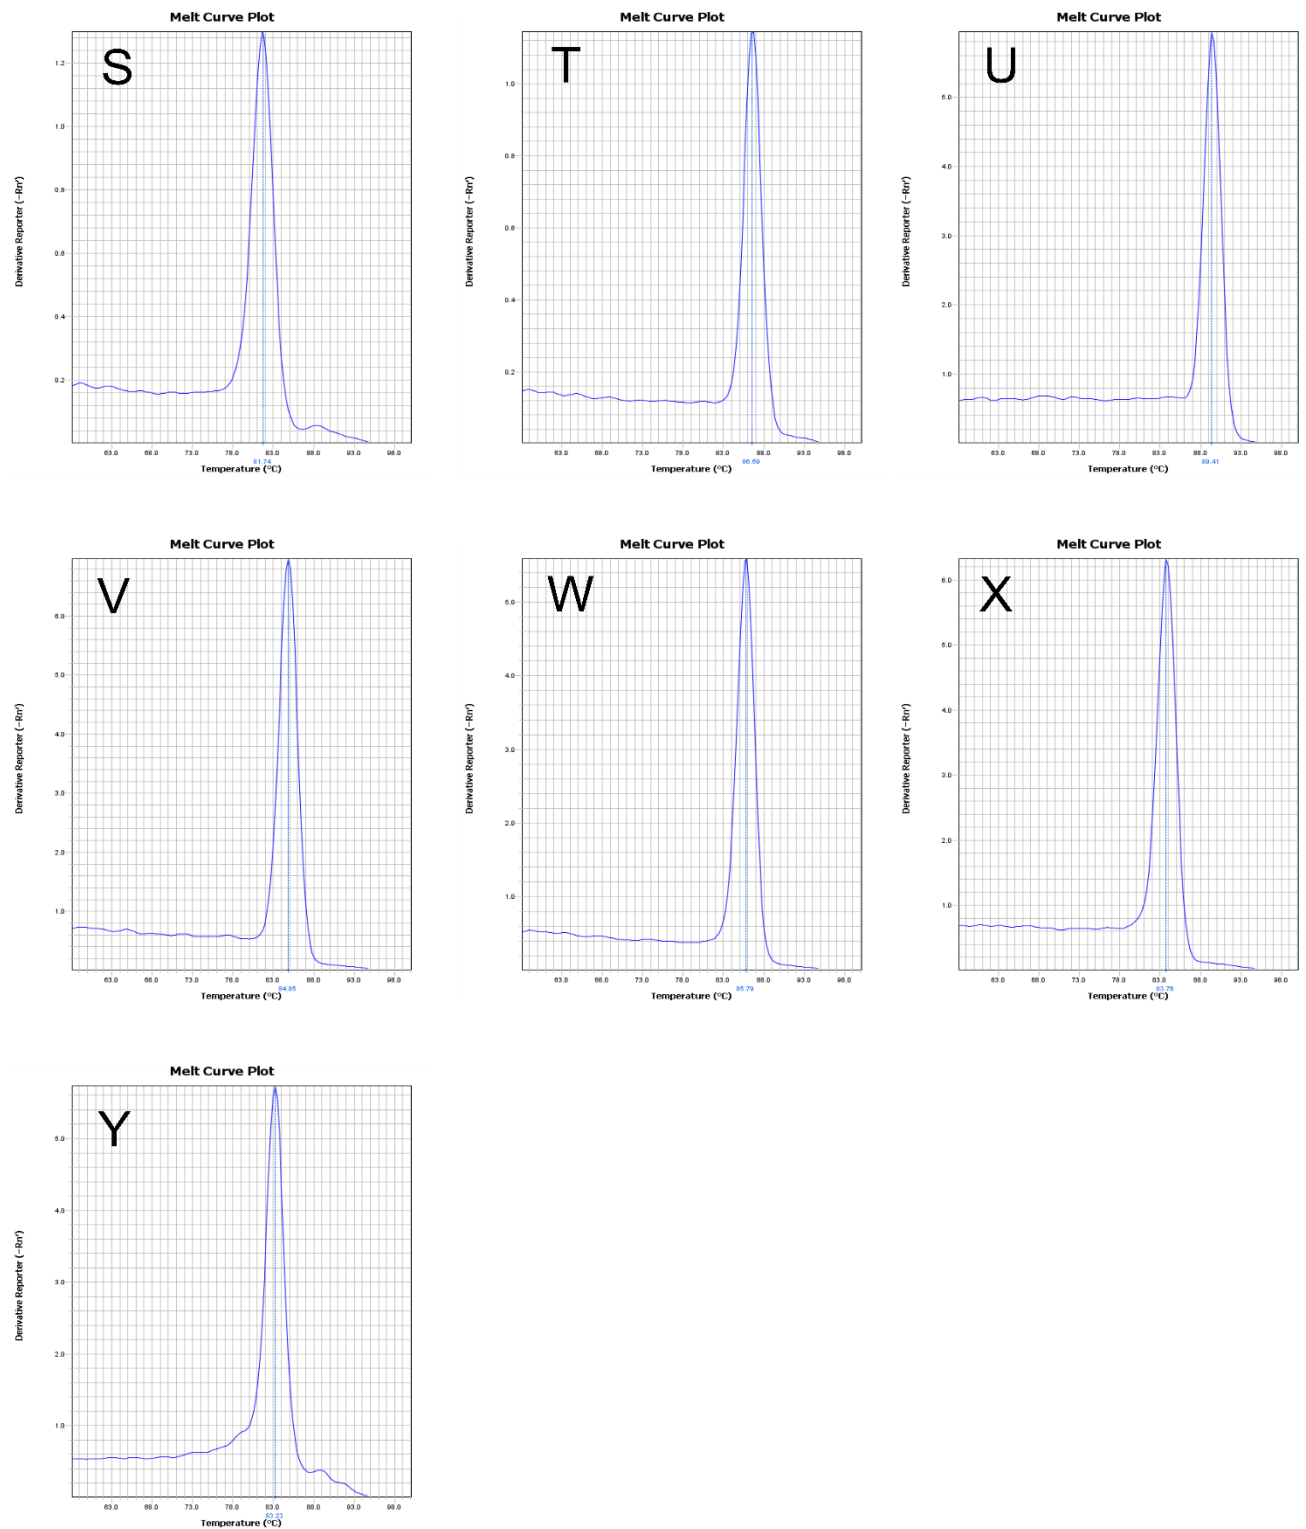

**Additional Figure 3.** The melting (dissociation) curve for the primers designed for the reference genes (S) *UBC*; (T) *PFN1*; (U) *EIF5A*; (V) *TPT1*; (W) *NACA*; (X) *PPIA* and (Y) *GABARAP*. A single sharp amplicon peak indicates high amplification specificity of the primer pair.

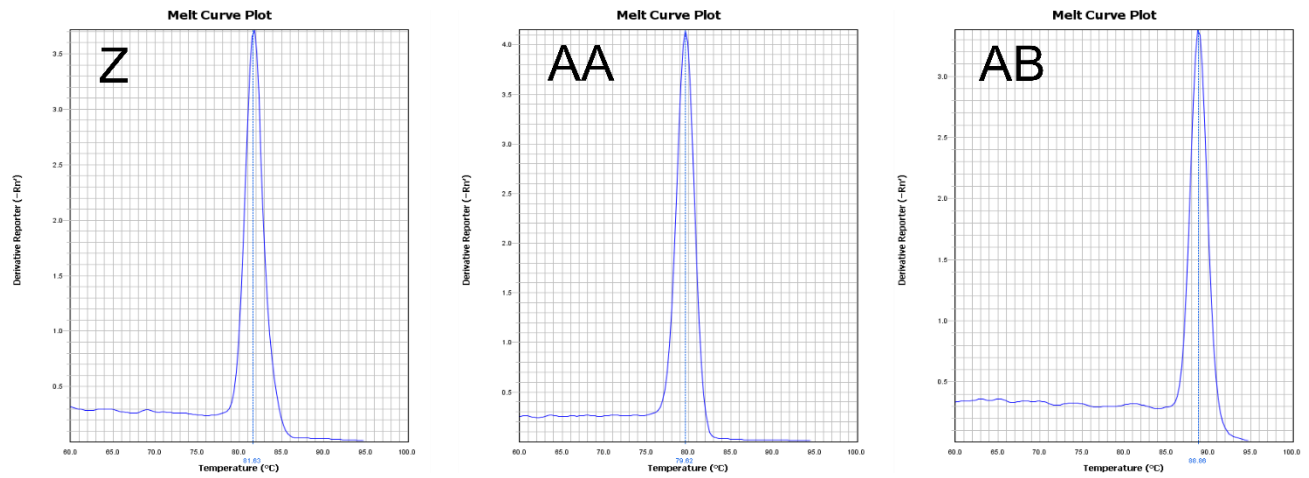

**Additional Figure 4.** The melting (dissociation) curve for the primers designed for the genes of interest (target genes) (**Z**) *AURKA*; (**AA**) *BUB1* and (**AB**) *SNAIL1*. A single sharp amplicon peak indicates high amplification specificity of the primer pair.

## REFERENCES

1. Liu LL, Zhao H, Ma TF, Ge F, Chen CS, Zhang YP. Identification of valid reference genes for the normalization of RT-qPCR expression studies in human breast cancer cell lines treated with and without transient transfection. *PLoS One*. 2015 Jan 24;10(1):e0117058. doi: 10.1371/journal.pone.0117058. PMID: 25617865; PMCID: PMC4305315.
2. Quiroz FG, Posada OM, Gallego-Perez D, Higuaita-Castro N, Sarassa C, Hansford DJ, Agudelo-Florez P, López LE. Housekeeping gene stability influences the quantification of osteogenic markers during stem cell differentiation to the osteogenic lineage. *Cytotechnology*. 2010 Apr;62(2):109-20. doi: 10.1007/s10616-010-9265-1. Epub 2010 Apr 16. PMID: 20396946; PMCID: PMC2873986.
3. Jain N, Nitisa D, Pirsko V, Cakstina I. Selecting suitable reference genes for qPCR normalization: a comprehensive analysis in MCF-7 breast cancer cell line. *BMC Mol Cell Biol*. 2020 Sep 25;21(1):68. doi: 10.1186/s12860-020-00313-x. PMID: 32977762; PMCID: PMC7519550.
4. Balwierz A, Czech U, Polus A, Filipkowski RK, Mioduszevska B, Proszynski T, Kolodziejczyk P, Skrzeczynska-Moncznik J, Dudek W, Kaczmarek L, Kulig J, Pryjma J, Dembinska-Kiec A. Human adipose tissue stromal vascular fraction cells differentiate depending on distinct types of media. *Cell Prolif*. 2008 Jun;41(3):441-59. doi: 10.1111/j.1365-2184.2008.00531.x. Epub 2008 Apr 14. PMID: 18422701; PMCID: PMC6496779.
5. Kılıç Y, Çelebiler AÇ, Sakızlı M. Selecting housekeeping genes as references for the normalization of quantitative PCR data in breast cancer. *Clin Transl Oncol*. 2014 Feb;16(2):184-90. doi: 10.1007/s12094-013-1058-5. Epub 2013 May 30. PMID: 23720140.
6. Tilli TM, Castro Cda S, Tuszyński JA, Carels N. A strategy to identify housekeeping genes suitable for analysis in breast cancer diseases. *BMC Genomics*. 2016 Aug 15;17(1):639. doi: 10.1186/s12864-016-2946-1. PMID: 27526934; PMCID: PMC4986254.
7. Jo J, Choi S, Oh J, Lee SG, Choi SY, Kim KK, Park C. Conventionally used reference genes are not outstanding for normalization of gene expression in human cancer research. *BMC Bioinformatics*. 2019 May 29;20(Suppl 10):245. doi: 10.1186/s12859-019-2809-2. PMID: 31138119; PMCID: PMC6538551.
8. Maltseva DV, Khaustova NA, Fedotov NN, Matveeva EO, Lebedev AE, Shkurnikov MU, Galatenko VV, Schumacher U, Tonevitsky AG. High-throughput identification of reference genes for research and clinical RT-qPCR analysis of breast cancer samples. *J Clin Bioinforma*. 2013 Jul 22;3(1):13. doi: 10.1186/2043-9113-3-13. PMID: 23876162; PMCID: PMC3726509.
9. Yuan B, Xu Y, Woo JH, Wang Y, Bae YK, Yoon DS, Wersto RP, Tully E, Wilsbach K, Gabrielson E. Increased expression of mitotic checkpoint genes in breast cancer cells with chromosomal instability. *Clin Cancer Res*. 2006 Jan 15;12(2):405-10. doi: 10.1158/1078-0432.CCR-05-0903. PMID: 16428479.
10. Bustin SA, Benes V, Garson JA, Hellemans J, Huggett J, Kubista M, Mueller R, Nolan T, Pfaffl MW, Shipley GL, Vandesompele J, Wittwer CT. The MIQE guidelines: minimum information for publication of quantitative real-time PCR experiments. *Clin Chem*. 2009 Apr;55(4):611-22. doi: 10.1373/clinchem.2008.112797. Epub 2009 Feb 26. PMID: 19246619.
11. Bio-Rad Real Time PCR Applications Guide. 2006; pages 5-6. Bio-Rad Laboratories, Inc. [http://www.bio-rad.com/webroot/web/pdf/lsr/literature/Bulletin\\_5279.pdf](http://www.bio-rad.com/webroot/web/pdf/lsr/literature/Bulletin_5279.pdf). Last accessed Oct 2020.
