# Supplementary material for: Identification of Novel Endogenous Controls for qPCR Normalization in SK-BR-3 Breast Cancer Cell Line
Source: Genes (Basel). 2021 Oct 17;12(10):1631. doi: 10.3390/genes12101631 (PMC8535678; doi:10.3390/genes12101631)
Supplement: Supplementary file 1 [file genes-12-01631-s001.zip]

Archive with 5 entries (5 files):
- Supplementary Files/Jain et al. Appendix 1.pdf
- Supplementary Files/Jain et al. Appendix 2.xlsx
- Supplementary Files/Jain et al. Supplementary File S1.pdf
- Supplementary Files/Jain et al. Supplementary File S2.pdf
- Supplementary Files/Jain et al. Supplementary File S3.pdf
