# Supplementary material for: Identification of Novel Endogenous Controls for qPCR Normalization in SK-BR-3 Breast Cancer Cell Line
Source: Genes (Basel). 2021 Oct 17;12(10):1631. doi: 10.3390/genes12101631 (PMC8535678; doi:10.3390/genes12101631)
Supplement: Supplementary file 1 [file genes-12-01631-s001.zip › Supplementary Files/Jain et al. Appendix 2.xlsx]

## Sheet: Description
		Identification of novel endogenous controls for qPCR normal-ization in SK-BR-3 breast cancer cell line
		Authors: Nityanand Jain*, Ingrida Mitre, Dina Nitisa, Valdis Pirsko and Inese Cakstina-Dzerve
		Excel Sheet Name		Description
		TCGA Results		The datasheet contains sorted and filtered genes ranked based on C.V%. which were filtered based on the criteria mentioned in the present
				study. A unique gene has been represented in each row followed by 82 columns containing data from individual patient in TCGA database
				which were identified as HER-E cancer type for that gene. At the end, mean, standard deviation and C.V% have been calculated.
		* For Correspondance
		Nityanand Jain	Inese Cakstina-Dzerve
		Laboratory of Molecular Genetics	Laboratory of Molecular Genetics
		Institute of Oncology	Institute of Oncology
		Riga Stradiņš University,	Riga Stradiņš University,
		Dzirciema street 16,	Dzirciema street 16,
		Riga, Latvia, LV-1007	Riga, Latvia, LV-1007
		nityapkl@gmail.com	inese.cakstina-dzerve@rsu.lv

## Sheet: TCGA Results
GENE NAME	Patient 1	Patient 2	Patient 3	Patient 4	Patient 5	Patient 6	Patient 7	Patient 8	Patient 9	Patient 10	Patient 11	Patient 12	Patient 13	Patient 14	Patient 15	Patient 16	Patient 17	Patient 18	Patient 19	Patient 20	Patient 21	Patient 22	Patient 23	Patient 24	Patient 25	Patient 26	Patient 27	Patient 28	Patient 29	Patient 30	Patient 31	Patient 32	Patient 33	Patient 34	Patient 35	Patient 36	Patient 37	Patient 38	Patient 39	Patient 40	Patient 41	Patient 42	Patient 43	Patient 44	Patient 45	Patient 46	Patient 47	Patient 48	Patient 49
GABARAP|11337	8.59104	9.12255	8.75706	8.93173	9.23431	9.03322	9.08027	9.50632	9.24677	9.47575	9.29011	9.01767	9.24138	9.04739	9.63425	8.67359	9.10115	8.54877	9.11742	8.85524	9.0485	8.79163	9.10685	9.03424	9.6213	9.43068	9.39142	9.11404	9.00902	8.60378	9.14706	9.15425	9.33814	9.25149	9.40014	8.58716	8.68671	9.34759	9.23039	9.00437	9.32837	9.13084	9.51467	9.31296	8.49917	9.16015	8.84736	9.44786	8.78004
ACTB|60	12.539	12.0535	12.1873	13.0157	12.3891	12.0529	12.8144	12.73	12.8835	12.3006	12.9192	12.6518	12.3297	11.653	12.2985	12.3853	12.8525	12.4436	13.0315	12.4578	12.4394	12.7588	12.3496	12.3148	12.6161	12.5016	12.0845	13.1916	12.414	11.914	12.2553	12.8477	13.0431	12.6035	11.8796	12.0914	12.8612	12.8309	12.6169	13.0002	12.5559	12.7148	12.0167	12.6776	13.5426	12.1093	12.3362	12.6939	12.3101
PFN1|5216	9.89254	10.1563	10.0517	10.8719	10.0948	10.2923	10.336	10.4232	10.2695	10.508	10.5315	10.1795	10.4049	10.3	10.2874	9.69456	10.2019	10.3854	10.6426	9.92587	11.1699	9.67355	10.3815	9.97012	10.7975	10.7768	10.0391	10.298	10.2462	10.5484	10.2656	10.6597	11.16	9.79925	9.95072	10.07	10.0263	10.3282	10.7719	10.3333	10.2003	10.2613	10.3098	10.401	9.94477	10.2507	11.0173	10.7283	9.94392
UBC|7316	10.3708	9.94375	10.6696	10.4186	10.3388	9.96613	10.4927	10.8434	10.6249	10.3564	10.7771	10.6003	10.6096	10.6038	10.8049	10.211	10.2601	10.4606	11.0293	10.429	10.4201	10.5883	10.4865	10.7602	11.1401	10.378	10.6737	10.5755	10.9652	10.387	10.549	10.1645	10.36	10.2715	10.3127	10.9647	10.1922	10.7621	9.99215	10.5212	11.0148	10.7565	10.905	9.9609	10.3225	10.01	10.0425	10.4416	10.3324
RPS27A|6233	9.67758	10.4763	10.5353	9.93163	10.7195	10.2483	10.5871	10.4806	10.372	10.7958	10.2437	9.85401	10.3648	10.4281	10.7663	10.4494	11.0176	9.99737	9.7905	9.79142	10.5783	10.8082	10.715	10.595	9.687	10.7434	10.5631	10.4489	9.82888	10.2159	10.7113	10.1587	10.4549	10.2981	9.60654	9.77879	10.0743	10.1299	10.0457	10.5493	9.80257	10.1084	9.88624	10.4441	10.7761	10.4576	10.8727	10.359	10.2367
EIF5A|1984	8.12525	7.96107	8.0591	8.58235	8.49571	8.3787	8.79928	8.73514	8.72206	8.32328	8.68488	8.29627	8.40804	9.2113	8.96671	7.78109	8.72528	8.47334	8.87718	7.74581	8.67608	8.2437	8.62328	8.7811	8.78743	8.61506	8.4572	8.7797	8.39232	8.04381	8.53486	8.46195	8.52526	7.85523	8.35205	8.37488	8.32127	8.40921	8.55888	8.66115	8.27748	8.83656	8.63992	8.57421	8.72683	8.46903	7.91254	8.63763	8.32065
UBB|7314	10.0793	11.3247	9.82666	9.99027	10.208	11.3036	10.1324	10.5511	9.69279	10.9205	10.6777	10.3239	10.5045	10.5227	10.8446	10.0805	9.99595	9.74016	10.2352	10.0556	11.0405	9.98486	10.2664	9.75819	10.4825	10.4453	10.6566	10.1887	10.4681	10.8979	10.5507	10.0267	10.5277	9.38879	10.8608	10.0216	10.0957	10.0001	11.5361	10.2751	10.3422	10.1557	11.4145	10.0371	10.7151	10.5293	10.3622	10.5168	10.3458
CFL1|1072	9.93554	10.4243	10.2918	10.3321	10.0967	10.4808	10.3532	10.8001	10.6936	10.3734	10.4932	10.5757	9.74821	10.633	9.72163	10.1596	10.8839	10.6432	11.0634	9.94952	11.2135	10.4892	12.1262	10.8071	10.6798	10.5979	10.5786	10.1515	10.1355	10.3848	10.734	10.35	10.5129	9.97457	9.81784	9.79355	10.6247	10.8794	11.1224	10.6515	10.8838	10.0863	10.2871	10.827	10.301	10.3489	10.4898	10.4432	10.6975
HNRNPC|3183	8.45829	8.46833	8.68389	8.70944	9.08243	8.76792	9.06838	8.89621	8.58063	8.46501	8.68325	9.2863	9.11361	9.06541	7.86789	9.01295	8.8262	8.62554	8.65867	8.3599	8.76053	9.21615	8.29204	8.89174	8.69926	9.22267	9.10685	8.64796	8.48568	8.8265	8.66165	8.55561	9.08231	9.05178	8.20027	8.51096	9.02736	9.01684	9.12485	9.24517	8.5715	8.53862	8.54445	8.48872	8.9668	9.05972	8.77494	8.60078	8.52539
TPT1|7178	12.225	12.1486	12.8752	12.4492	12.3825	12.826	12.5954	12.3318	12.819	12.6357	12.114	12.3515	12.426	12.6373	11.8108	11.8349	12.6001	12.2512	11.7369	12.0607	12.4566	13.13	12.1497	12.8737	13.2553	12.3794	11.2518	12.538	11.1664	12.9128	11.9665	11.7596	11.3563	11.8023	13.0637	11.4726	12.5463	12.1133	11.8311	12.3264	11.755	12.2349	13.0745	12.4042	12.1686	12.3572	11.908	12.5883	12.5332
PCBP1|5093	8.00311	8.7167	8.16213	8.20666	8.28081	8.4004	8.13799	8.30736	8.08859	8.48633	8.18522	8.13406	8.91484	8.2762	9.05362	8.50836	8.72631	8.43169	8.1486	8.36905	8.72429	8.61247	8.02148	8.55643	8.44455	8.93553	9.19045	8.54778	8.94119	8.41515	8.68857	8.56708	9.07715	8.71451	7.97024	8.48266	8.38449	8.42693	8.25196	8.59911	8.57372	8.12055	8.88867	8.84373	8.90356	8.76568	8.37643	8.65874	8.55966
OST4|100128731	8.95669	9.5294	9.28478	8.70397	9.00998	9.13317	9.78848	9.63963	9.72671	10.1448	9.56776	9.57278	9.51516	8.95021	10.1754	9.53571	9.1947	9.40331	9.93182	9.34072	9.22742	9.37458	9.7684	9.38069	9.29578	9.37708	10.458	9.77459	9.90581	9.12567	9.48527	10.1157	9.87041	9.93936	9.26876	9.40487	8.60037	9.25425	9.54797	9.14706	9.68551	8.95428	9.47784	10.2382	9.75728	9.02186	9.89699	9.78714	9.54442
EIF4A1|1973	8.40933	8.53076	8.80202	8.76625	9.48487	8.91845	8.86792	8.73443	8.38018	9.11907	9.06021	7.85645	9.32521	10.178	9.48606	8.33001	9.11498	8.93349	8.87228	8.75013	9.31535	8.84937	9.12056	9.5589	8.88693	9.2827	9.06398	8.78519	8.34698	8.39653	9.16777	8.50714	9.31887	8.62514	9.10318	9.20829	8.72543	8.95927	9.47875	9.12969	8.97409	9.34777	9.61883	8.60377	8.993	9.0337	8.22609	9.2439	9.01345
NACA|4666	9.65185	10.5908	10.2939	9.77171	10.5845	10.4032	10.3553	10.7535	10.2793	10.3954	10.4741	9.97788	10.9896	10.9409	10.193	10.5812	10.4157	10.2516	9.94953	9.76005	10.6794	11.4941	11.1472	10.7912	10.5603	10.9957	10.44	10.1632	9.08895	10.2794	10.0884	9.93374	10.0244	9.988	9.61526	9.90345	10.0983	10.2014	9.91784	10.5823	10.555	10.0882	10.6951	10.2169	9.98404	10.2432	10.7272	10.5127	9.38153
DAD1|1603	8.22309	8.54168	8.79596	8.78902	8.59644	8.77733	9.79565	8.83944	9.07191	8.86144	8.91306	9.16017	8.83511	8.26107	8.90772	8.86446	8.48663	8.7849	8.60913	8.92279	8.71497	9.22817	8.8736	7.89757	8.8247	8.71864	8.81713	8.91906	8.736	8.28266	8.95796	7.9021	9.32432	9.4974	9.01552	8.16438	8.83662	8.63838	9.61739	8.99433	8.90139	8.33683	8.70624	8.15863	9.04551	8.80809	8.56005	8.42249	8.69354
PSMB4|5692	8.47783	8.60427	9.28656	9.10523	9.06105	9.7452	8.9402	9.69782	9.39812	8.87423	8.97948	9.35613	9.30801	9.204	8.84385	8.45299	10.2141	9.77687	9.23212	8.37079	8.58649	9.45593	8.84431	9.14975	8.84769	9.10068	9.05505	8.97627	9.47926	9.17921	8.8253	8.34609	9.0089	8.82932	8.11169	8.46802	8.90749	8.95493	9.14341	9.09062	8.83738	9.10911	8.67172	9.122	8.95289	8.64818	8.88492	8.89727	9.02669
DYNLL1|8655	8.74127	9.24936	8.60917	8.95914	9.14482	9.55426	9.83546	9.5977	9.20716	9.19483	9.29474	9.66881	9.33341	9.13952	9.23946	8.93067	9.05373	9.34105	8.1995	9.18781	9.49265	8.76683	8.70087	9.64015	10.0619	9.76827	9.87115	9.37322	9.19581	9.67009	9.39356	9.59256	9.75499	9.37612	8.90996	9.28791	8.97076	8.80889	7.77901	9.37242	9.60359	9.2311	9.56191	9.56171	9.04983	9.65279	9.14895	9.48946	8.89992
UBL5|59286	9.03205	8.94167	9.05016	8.68697	8.53981	9.18477	9.77433	9.45839	9.09684	9.69961	9.01821	9.44317	9.19986	8.81086	9.55646	8.98254	8.95877	9.85357	9.25051	9.45351	9.13894	8.01456	8.74473	9.22112	9.2199	9.2279	8.65695	9.60632	9.72307	9.27196	9.34114	8.92488	9.57878	8.80844	9.14508	8.6588	8.71059	8.53316	9.14655	9.18704	8.95392	8.67797	8.94951	9.83472	8.22999	8.59765	9.25794	9.51141	8.97705
ARF1|375	10.3622	9.09217	8.79863	9.46766	8.98759	10.216	9.25377	9.82876	9.5534	9.65113	9.7637	9.73904	9.74928	9.51077	9.59684	9.27217	9.39224	10.0884	9.48915	9.05172	9.09728	10.1644	9.32139	9.18976	9.48514	9.1497	9.73277	9.42619	9.13315	9.44792	8.6305	9.73566	9.38099	9.58007	9.59866	9.07777	9.27306	9.58061	9.70875	9.50092	9.4517	9.69951	9.30835	9.14887	8.64119	9.20583	9.28022	9.22835	9.10014
RPS4X|6191	10.6935	11.6867	11.7946	10.6271	10.9631	12.4406	11.6919	11.9646	12.1421	11.5012	11.3629	11.5166	11.9185	12.1783	11.8526	11.1485	12.037	10.9351	10.9723	10.6362	12.3843	12.1739	11.4211	11.9399	11.6925	12.0041	11.6649	11.1899	10.3971	11.3433	11.4878	10.2275	10.9338	11.6209	10.9742	10.5613	11.4471	10.9449	11.9122	12.2613	11.6424	11.4719	11.4546	11.0997	11.5308	11.2858	12.2577	11.1893	11.562
RPS29|6235	10.7017	11.3619	12.1693	11.4251	12.0244	11.5791	12.1498	11.9579	12.642	12.1743	11.3886	12.0562	11.5389	12.0267	11.3542	11.5509	12.0781	11.0982	11.4249	10.8531	12.0997	11.8351	12.5767	11.5597	11.4886	11.6503	11.7951	12.2188	10.4381	12.17	11.1445	11.5104	12.2731	11.9634	11.6084	10.6484	11.5022	10.8401	12.2899	12.0597	11.5328	11.9023	11.314	11.1786	10.7215	11.9857	12.1713	11.2937	11.718
HNRNPA2B1|3181	8.13115	8.3552	8.04761	8.4815	8.14588	8.90633	8.37173	7.58491	8.24798	8.20021	8.6765	8.77911	8.83099	8.6672	8.06464	8.31951	8.43052	8.71744	8.44721	8.45989	8.64753	7.92489	8.33658	8.40762	8.30325	9.10796	8.86582	7.96262	8.23138	8.77736	8.41677	8.45815	8.68444	8.03384	7.95196	8.74095	8.53561	8.7143	9.04613	8.57628	8.23352	8.39004	8.50943	8.87527	8.81226	8.85133	8.60017	8.716	8.52123
CALR|811	10.8475	9.9414	10.3021	9.25428	9.50436	9.60475	9.67057	10.4391	9.72876	9.67336	9.63502	9.71157	9.89943	8.65262	9.25638	9.23124	9.38526	10.5482	10.4268	10.1912	9.78976	9.52207	9.74974	9.64353	9.60103	10.1408	9.03653	10.4106	9.5438	9.38266	10.21	9.57206	10.9069	9.52825	9.52526	10.1998	10.6728	10.25	9.88944	9.96405	9.46581	10.0387	10.6449	9.62678	10.5568	10.323	9.92135	9.81596	9.68015
RPL24|6152	9.52531	10.6088	10.702	10.0769	10.9384	10.1912	11.457	11.3145	10.8235	11.1466	10.7611	10.7256	10.5988	11.1591	10.44	10.9886	11.3525	10.4414	9.54568	10.4783	11.3432	11.2632	10.7931	10.7913	10.9931	11.0674	10.1124	10.6177	9.74816	10.3795	10.7698	10.4545	10.3103	10.438	9.6003	9.48994	11.0152	10.5493	10.4365	11.1242	10.4879	10.2496	10.788	11.0879	10.9888	10.5589	11.1795	11.0416	10.3239
HNRNPL|3191	7.58788	7.92621	7.70248	8.1361	7.67041	8.43394	7.80807	7.84913	7.88082	7.61968	7.7726	8.27245	8.04473	8.07224	7.28003	7.58032	8.0826	8.16312	7.6148	7.67128	8.00896	7.59847	7.7243	7.88632	7.89425	8.28502	8.61875	7.54796	7.93116	8.55978	7.9276	7.77164	8.56041	7.92762	7.72167	7.57956	7.95541	7.88766	7.81307	8.05491	7.80997	8.02279	8.17699	8.01095	8.55645	8.94111	8.10868	7.7227	8.3402
HSP90AB1|3326	10.2206	9.97461	9.89773	10.4997	10.3462	11.4352	10.0524	10.1853	9.72416	10.0977	9.91833	9.41953	9.94543	10.9356	10.3154	10.4111	9.36932	10.9036	10.7314	10.3383	10.6428	10.0119	10.477	11.0208	9.98257	10.5624	11.1444	9.4671	9.76739	10.6605	10.4829	10.5703	10.9978	10.4445	10.0141	11.0076	10.4469	10.5562	10.2808	10.228	10.3351	10.6889	9.97695	9.89819	10.2429	10.4582	10.1618	9.98675	10.6271
PTBP1|5725	6.72854	7.32953	7.1937	6.89946	7.15508	7.32191	7.07478	7.49759	6.99855	7.11054	7.15474	7.04513	7.63396	7.54176	6.24492	7.1055	7.05734	7.35171	7.04083	7.02437	7.4954	7.19399	7.08627	7.09686	7.20334	7.62633	7.31327	7.17093	7.12284	7.49207	7.22994	7.25625	7.73779	7.21292	6.59685	7.21281	7.44451	6.97103	7.72347	7.60429	6.96498	7.20682	7.05038	7.55631	7.44078	7.00683	7.39994	7.00686	7.53239
DULLARD|23399	5.69398	6.03315	5.84757	6.04067	6.47351	6.17914	5.79579	5.66907	5.95217	5.82535	6.5216	6.0504	6.11595	6.33686	6.57256	5.86583	6.2051	6.27822	6.05604	6.04745	6.1273	5.75683	5.9713	5.93032	6.45295	6.24187	6.10644	6.23734	6.42996	5.86429	5.94386	6.53196	6.58508	6.05722	6.36256	6.0994	5.7771	6.33467	6.18685	6.20245	6.13891	6.44706	6.29075	6.35388	5.937	6.5387	6.13482	6.64094	6.08274
YWHAE|7531	8.32699	8.35801	8.11453	9.71288	8.87455	9.17943	8.89785	8.61674	8.57532	8.73575	9.32363	8.34562	9.55766	9.50071	9.14328	8.46072	8.91823	8.81869	8.61253	8.42632	8.74018	8.67418	8.59651	9.1858	9.41559	9.08305	9.3519	8.88859	8.85216	9.37653	8.77283	8.4224	9.44141	9.16307	8.7534	8.84676	8.94004	9.15574	9.30038	9.18906	8.87686	9.3098	9.38387	8.51965	9.0841	9.33979	9.15371	9.02457	8.41546
ARPC4|10093	7.34004	7.28086	7.60617	7.97844	7.429	7.25261	8.34054	7.50331	7.67554	7.63818	7.84013	7.58802	7.91633	8.02036	7.42499	8.0877	8.15621	7.65782	7.15187	8.27723	7.8488	7.6939	7.06231	8.56753	7.83271	7.85226	6.93586	7.69399	8.23441	7.39038	8.12674	7.36929	7.70397	7.40131	7.67233	7.27968	7.67172	7.67222	7.6249	7.31355	7.33409	8.41423	7.80346	8.58105	7.97046	7.59214	7.44635	7.92521	7.76246
PTMA|5757	10.5895	10.945	10.0873	10.0295	9.98481	10.0829	10.8093	10.3973	10.3735	10.6416	10.8811	11.2415	10.9682	10.0494	10.0956	9.74515	10.4847	10.043	9.89671	10.5015	10.5652	10.4734	11.0104	9.68136	10.6851	11.1184	11.0333	10.4423	10.4114	10.9277	10.636	10.5572	10.579	9.46764	8.95963	10.2251	10.8028	10.7324	10.9657	10.6719	10.6316	10.168	9.71585	11.3684	10.994	10.5674	10.9712	10.5034	10.6537
C19orf56|51398	7.58542	7.34836	7.49829	7.43692	7.62878	7.64191	7.90461	7.90035	7.79868	7.53453	7.52188	7.8396	7.83426	7.56921	7.72326	7.22658	7.16604	8.57247	7.64495	8.56869	7.65767	6.74775	7.34927	7.92877	7.32295	7.56347	7.76352	7.94797	7.70603	7.59401	7.55612	7.35962	7.57086	8.00923	7.87995	7.20995	7.46901	7.23566	7.46046	7.83719	7.29352	7.4489	7.74047	8.81884	7.99533	8.12788	7.64333	7.62355	7.75459
CLIC1|1192	8.72695	8.67227	8.73762	8.98812	8.53637	8.83536	9.59115	9.04997	8.60296	9.10643	9.15666	8.97107	9.60125	9.1595	9.29229	8.71961	8.64453	8.68687	7.89062	9.45952	9.11427	8.74946	8.58293	9.34185	9.27045	8.58903	8.57155	8.72889	9.61174	8.68406	8.82679	9.09134	9.84404	8.70985	8.53441	9.76289	9.1319	9.36901	8.52642	8.70244	9.10197	9.2234	8.79251	9.38796	8.69343	8.68472	9.17814	9.47482	8.04839
PFDN5|5204	8.402	9.647	9.19905	8.64656	8.95126	9.1574	9.75719	9.88304	9.16133	9.63596	9.29149	8.87928	9.62187	8.91684	8.96462	9.60923	9.39143	8.67719	8.91458	8.84519	9.33989	9.86687	9.11837	9.25809	9.83198	9.46937	9.04761	9.35685	8.42389	8.79913	8.76833	9.12323	8.79345	7.97994	8.41358	8.49359	8.79809	8.52381	8.93772	9.00146	9.54097	8.48801	8.83411	9.3313	8.58703	9.03454	9.66012	9.48051	8.026
CSNK2B|1460	7.44475	7.43725	7.58349	7.61434	7.70544	8.32756	8.25921	7.95053	7.59066	8.00865	7.83561	8.2502	7.75843	8.18774	8.20795	7.60163	8.27486	6.98014	7.57354	8.16377	8.13439	7.81297	7.71479	7.98567	8.20526	8.36507	8.39592	7.5479	8.41575	7.67371	8.17813	8.34346	8.30735	8.32287	7.34156	8.04347	8.45404	8.12155	7.57719	7.83748	7.78265	8.23885	7.78108	8.48244	7.72518	7.78869	8.26289	7.77752	7.16626
RPL10|6134	8.6186	8.90068	9.51682	9.05362	9.24455	9.28152	10.2978	9.77886	9.26908	9.53074	9.23376	10.1249	9.37929	9.69501	9.58445	9.21557	9.15087	9.45253	10.2274	9.34215	10.6335	9.45945	9.66713	9.75495	9.50814	10.0025	9.87504	9.91573	8.42032	9.55084	9.38072	8.59251	8.88076	9.0868	9.2584	8.65475	9.21344	8.82481	9.27435	10.0034	9.33105	9.32893	9.74496	9.74569	8.65404	9.52823	9.69703	9.26934	9.65228
CD81|975	9.45043	9.26644	9.27872	9.63809	9.26363	8.83244	9.04644	9.84915	9.16262	9.63734	9.78934	8.27317	9.4522	8.9574	9.28545	9.1865	9.06532	8.91433	9.3277	8.92708	9.64699	9.33426	9.36061	9.06106	9.03589	8.81755	9.19241	9.23363	8.68215	9.33571	9.37601	10.2988	9.85921	9.55033	9.91956	9.93774	8.69958	9.62509	9.31365	9.66742	9.53605	9.22306	8.94933	9.53663	7.85868	9.36276	9.88702	9.95628	8.85031
RPS11|6205	11.3316	11.6748	12.2427	11.1049	11.9395	11.401	11.9793	12.1829	12.8524	12.3873	11.8025	11.8376	11.7255	11.8184	11.7235	11.7463	12.4274	11.2895	10.8365	11.1258	13.779	11.185	12.172	11.7518	11.8308	12.1044	12.0451	11.8845	10.5134	12.4013	10.9178	10.9772	11.3475	10.7228	11.1226	10.72	11.5655	10.8461	11.9218	11.8071	11.5156	11.4441	11.5793	12.1378	10.929	11.4606	12.6063	11.4868	11.8195
COX6B1|1340	9.22834	9.33317	9.21117	8.67108	8.81904	9.40354	10.238	10.0669	10.433	10.1553	9.65389	9.61642	9.24953	9.1546	10.4187	9.00646	9.41047	9.49653	9.87366	8.25256	9.13076	8.36459	9.59064	9.70703	9.74291	9.5637	10.198	9.76083	9.88289	9.76035	9.32211	9.50483	9.57383	9.43019	9.52187	8.89943	9.02771	9.27988	9.80128	9.16135	9.50963	9.18191	9.53759	9.14865	9.29617	9.18472	9.2933	8.97642	9.28328
RPL5|6125	9.76924	10.4011	10.5577	10.1217	10.4818	10.0947	10.8284	10.4784	10.6457	10.4825	9.85219	10.5359	10.4691	10.8561	10.1703	10.21	10.5386	10.1079	10.0035	9.92566	11.0041	10.1032	10.5218	10.9757	10.3159	11.2148	10.4318	10.122	8.89833	10.0723	10.229	9.59743	9.51384	10.015	9.63611	9.73952	10.4915	10.8127	10.8469	10.2886	10.1826	10.5822	10.2739	10.3738	11.0443	10.5773	11.0032	10.2309	10.8371
DYNLRB1|83658	7.52833	8.40349	7.53396	8.00194	7.80919	8.9009	8.50876	8.63596	8.25658	8.4651	7.87728	7.83519	8.16004	7.82982	8.30475	8.27637	8.06002	8.34696	8.38375	8.31143	7.68515	7.77457	8.77881	8.45395	9.03625	8.53928	8.62412	7.9058	8.6137	7.91325	8.58517	8.41839	8.50089	8.15415	7.95991	8.08327	7.57463	7.91456	8.16269	8.82713	8.24041	8.03192	7.93079	9.23292	8.27379	7.96781	8.25833	7.96764	7.9036
COX7C|1350	9.60608	10.0513	10.1468	9.2536	10.2169	10.4814	10.971	10.6102	9.42584	10.9364	9.93524	10.941	10.384	10.5119	10.7332	9.62785	10.1322	9.61614	10.4235	9.26387	10.1573	10.4748	10.3447	10.5255	10.6926	10.771	10.4999	9.76131	10.1607	10.321	10.1893	9.7503	9.30642	10.5189	9.56703	8.82262	9.49187	9.50069	10.2875	10.0923	10.1736	9.22661	10.5133	10.1031	9.3076	10.2327	9.70721	10.2763	9.58284
RPS7|6201	9.19239	9.70059	9.67373	9.08972	10.0099	9.58452	9.99689	9.79208	10.37	10.3682	9.4167	9.15323	9.32293	9.91783	9.95519	9.76668	10.0893	9.37125	9.57948	8.84077	10.0631	10.2072	10.1329	9.79583	9.41731	10.5675	10.5617	9.70484	9.24603	9.67293	10.0583	9.47958	9.50317	9.56003	9.03802	9.1268	9.40177	9.21933	10.2708	9.92209	9.02109	9.5219	9.47913	9.81707	10.0589	9.69148	10.3976	9.98186	9.64021
RPL31|6160	11.1971	11.621	12.0128	10.9362	11.8731	10.8363	11.8595	11.6968	12.2289	11.7578	11.557	11.1454	11.6616	11.6331	11.6506	11.8283	12.1217	11.0376	11.0259	10.7519	12.2722	11.8129	11.9065	11.8347	11.4963	13.3303	11.4675	11.529	10.8475	11.5022	10.9803	11.3485	10.8419	11.1964	10.4506	10.5708	11.0263	10.893	12.0465	11.8126	11.4518	11.0825	11.4575	12.2414	11.3337	11.3374	12.4021	11.387	11.4311
RPLP1|6176	11.1196	11.5487	12.4804	11.7106	12.0796	12.545	12.4085	12.8885	12.3459	12.4436	11.9594	11.7781	12.2673	12.1506	12.1069	11.6991	11.6817	11.925	12.6648	11.5317	13.0279	12.0764	12.0981	12.604	12.5451	11.9722	12.5176	13.0367	10.8628	11.8623	11.2927	11.448	11.1884	11.7057	11.3579	10.819	11.2318	11.1343	12.5336	11.8747	11.5255	12.1016	11.9697	11.9919	10.6439	11.312	12.426	11.8413	11.7617
RPS13|6207	9.45275	10.3937	10.9087	10.014	10.8759	10.8968	10.2897	10.9862	10.7052	10.9508	10.6448	10.38	10.3661	10.776	9.77859	10.3382	10.5022	9.31062	9.58175	9.37592	11.1047	11.1206	10.3124	10.6054	10.1268	10.8038	10.3975	10.0482	9.29267	10.5347	10.091	9.89311	9.42651	10.9418	9.9107	9.81686	10.4018	10.1925	10.5395	11.1165	9.76259	10.7632	10.6235	10.4878	10.377	10.5708	10.9153	10.243	9.734
GNB2L1|10399	10.004	10.585	10.9379	10.9704	11.1114	10.6095	11.0056	10.8279	11.1956	10.8377	11.0621	10.5769	10.6963	11.4358	11.0301	11.2101	10.5376	9.79777	10.3988	10.0994	11.7432	11.3442	10.8353	11.2037	10.6693	10.9718	11.2292	10.0971	9.63205	10.6374	10.2737	10.0661	9.9862	10.4838	10.0174	9.89833	10.9909	10.474	10.9073	10.9491	10.8897	10.4025	10.4848	11.457	10.3431	10.5184	11.2328	10.7343	10.2536
FAM32A|26017	6.46882	6.94283	6.40827	6.40291	6.3912	6.12325	6.98581	6.70697	6.29157	6.57559	6.58248	6.73593	6.88166	6.67437	6.76838	6.28638	6.21801	6.80769	6.46213	7.03115	6.5001	6.51922	5.96435	6.92052	6.37257	6.55106	6.19763	6.63745	6.32812	6.65153	7.00995	6.34499	7.08495	6.66174	6.69147	6.73345	6.56829	6.55268	6.3984	6.74567	6.28801	6.03011	6.78817	7.07346	7.34005	7.48714	6.65308	7.20766	6.76373
FTH1|2495	11.1089	11.7906	11.8371	11.7285	11.9568	12.7661	11.3156	12.3368	12.0466	11.8546	11.9888	11.5433	10.6297	10.3482	10.1196	11.4959	11.5281	12.1038	12.3232	11.8841	11.6309	11.8295	12.3872	11.739	11.2721	11.2442	11.0229	12.2577	12.1174	11.7629	11.581	11.1203	11.3467	12.4692	13.5089	11.5383	11.353	12.4258	12.7518	11.2664	11.0813	11.3568	11.8961	11.7704	11.5807	11.0534	11.6139	10.5464	12.8109
RPL11|6135	10.5027	11.2629	10.9402	10.8071	11.2996	10.4634	11.9771	11.7945	10.942	11.7208	11.5511	11.4797	11.0442	11.0111	10.5846	10.9595	11.8041	10.3051	10.3255	10.6508	12.1261	11.1054	11.5865	11.636	10.9741	11.9214	11.0543	11.158	10.2586	11.2924	10.7743	10.8648	10.6629	9.72134	10.0794	10.1462	10.4136	10.3384	12.0975	11.5194	11.2787	11.2628	11.1375	11.5846	10.6754	11.2215	11.4253	10.9824	10.5232
TMSB10|9168	12.7503	13.352	12.5308	12.1346	11.9031	11.9568	13.1467	13.0123	12.955	14.2407	13.4286	12.9581	12.13	11.1369	12.2993	12.4712	13.0448	12.3254	13.5793	12.5938	12.4761	12.5549	13.4537	11.9928	12.6658	13.2502	13.3679	13.9022	13.5959	12.4464	13.4136	13.6531	13.8184	11.7072	11.5069	12.6161	12.3591	13.1883	13.1657	12.6599	12.7588	11.6812	12.0609	13.7705	13.1673	12.2732	12.7149	13.2946	12.8181
PSMA2|5683	6.80131	7.12023	6.70904	7.21134	7.0069	6.8973	7.57907	7.19363	7.12292	7.13151	7.19766	7.42253	7.26017	7.2537	7.66507	6.99054	6.99529	7.34078	7.52084	7.52855	6.93457	6.81518	7.29106	7.69673	6.76441	7.70105	7.60104	7.58845	7.55011	7.68377	7.45301	7.05713	7.26531	7.52518	7.31916	7.70215	7.08089	7.51867	6.82186	7.4797	7.4	7.04118	7.0613	8.2125	7.75512	7.32929	7.09601	7.31783	7.63379
C19orf50|79036	6.19876	6.17355	6.05175	5.75239	6.0819	6.91227	6.43808	6.0301	5.99286	5.90846	6.18772	6.31199	5.97572	5.47084	5.95851	5.87005	6.32518	6.4267	6.36972	6.90327	6.05943	6.03079	5.8384	6.30537	5.64311	6.18142	5.47841	6.03328	6.13076	6.13794	6.31572	6.08026	6.16193	5.68909	6.17055	6.20256	6.17467	5.90724	6.09488	6.14694	5.87637	5.99956	6.2911	6.80525	6.35535	6.108	5.68034	6.80792	6.02903
SF1|7536	6.44988	7.19643	7.04149	7.09094	7.25157	6.77237	6.74578	6.9087	6.54046	6.40343	6.97421	6.75913	6.84153	6.67023	6.24388	6.74159	6.9941	7.11646	7.02123	6.83361	7.23758	7.25814	7.9277	7.13909	6.64087	7.02742	7.36895	6.33691	6.70135	7.25739	6.88056	6.87186	6.95916	7.44377	6.75485	6.86692	6.81952	7.28836	7.21842	7.05386	6.74853	7.02207	6.88064	6.94167	6.65835	7.36985	6.95171	6.3349	7.42494
TUBA1B|10376	9.44284	10.0633	9.79632	9.60343	9.6525	9.84432	10.1638	9.03284	9.54403	10.0063	9.53183	10.1087	9.9827	10.6763	9.48597	9.71396	9.94839	10.1137	10.5132	9.44934	10.7098	9.10923	9.88273	9.77102	9.68337	10.8752	10.1253	9.88178	10.0593	10.5625	9.68139	9.70325	10.4613	9.49841	9.438	10.9194	10.0123	9.54395	10.1134	10.1708	10.1015	9.66598	9.49794	10.2416	10.0141	10.3579	9.5881	9.88978	9.23047
S100A11|6282	11.3721	10.9224	11.7615	11.2428	11.4101	11.1995	11.2541	12.4184	11.7349	11.2411	11.4983	12.3045	11.8234	9.70475	10.4085	11.4333	12.0538	12.011	11.4999	10.4698	10.8889	12.0306	11.0999	10.9635	12.326	11.3014	11.4752	10.8036	12.0036	11.5467	10.8347	10.8004	11.7543	12.2736	11.4871	10.9088	11.252	11.5782	10.7083	11.427	11.1126	10.6076	10.881	11.2723	10.4004	11.1417	10.736	10.9817	11.2583
CAPNS1|826	8.36997	8.7746	8.22698	8.29908	8.5723	8.54545	9.11358	8.73598	9.20845	9.52841	9.09084	8.71968	8.88119	9.06785	9.29988	8.37334	9.12609	8.69626	9.01288	8.05659	9.21848	7.81124	9.11084	9.49601	8.86132	8.89983	9.81054	8.67386	8.5937	9.12862	8.44393	8.92238	8.80795	9.26153	8.71144	7.84653	8.70426	9.01837	9.43651	8.71123	9.24402	8.74698	9.34673	8.44452	9.30608	8.63354	8.47147	8.19987	8.90779
RPL41|6171	10.8326	12.322	12.0026	11.3341	12.375	11.714	12.6781	12.3115	12.3844	12.3212	12.1442	12.1608	12.2472	12.7961	11.7596	12.1973	11.9772	11.7719	11.3967	11.2627	12.6524	13.4654	13.1929	12.3715	11.6435	12.2995	12.2952	12.4435	10.7709	12.1751	11.3788	11.4044	11.7008	12.2979	11.3736	11.3709	11.8936	11.4549	12.0839	12.1003	11.9113	11.5524	12.0666	12.1607	11.2829	11.811	11.9984	11.8079	11.2423
HNRNPM|4670	6.76654	7.62903	7.03081	7.35392	7.43835	7.4587	7.83008	6.49969	7.04366	6.87451	7.37072	6.99406	7.87706	7.55882	7.01641	7.19857	7.10826	7.8697	6.85297	7.2607	7.68836	6.96951	7.06993	7.34892	6.46698	7.42593	7.36541	6.71869	6.97046	7.41347	7.02883	7.15638	7.87645	6.96542	6.9692	7.99545	7.69698	7.33478	7.50522	7.47216	6.86797	7.34079	7.52712	7.4023	7.96856	7.4903	7.34218	6.9999	7.7965
RPL26|6154	9.82778	10.9779	10.7369	9.72754	11.23	9.91232	10.7346	10.3382	10.738	10.796	10.3827	9.75393	10.8094	11.5135	10.9603	10.478	10.594	9.41375	9.94318	9.83496	11.4313	10.5832	10.8252	10.6938	10.2651	10.8918	10.0635	10.2587	9.3579	11.0732	10.0956	10.1219	9.91932	10.0852	10.3634	9.28852	10.2862	10.0469	11.0515	11.3701	10.3432	10.9055	10.3223	10.0098	10.1149	10.7472	10.5077	11.1188	10.1611
CALM2|805	9.73294	10.2075	9.74089	9.76372	9.91572	10.6729	9.98688	9.74006	9.00666	9.6572	10.4725	9.32813	10.2754	9.49974	10.6974	10.9415	10.103	9.53995	10.1542	9.915	9.63041	10.3156	9.56864	10.0316	9.83844	10.3851	10.2709	9.48513	10.5084	10.1031	10.1193	10.0372	10.34	10.4581	9.46021	9.74126	10.1031	10.2611	9.20228	10.1342	9.80777	9.80935	9.59595	9.7054	10.3692	10.1636	9.28023	10.4255	9.96567
EWSR1|2130	6.69593	7.05175	7.16901	6.72311	6.62102	7.49407	7.21525	6.88365	6.99732	6.60547	6.97565	7.13968	7.53969	7.18125	6.28368	7.63064	7.09538	7.03345	6.94137	6.85585	7.56531	6.84879	7.16126	6.7893	6.86476	7.77562	7.06261	6.31001	6.92599	7.33997	6.55272	6.83775	7.19076	6.52923	6.12658	6.89766	6.99694	7.07236	7.17822	6.96445	7.66448	6.70536	7.46387	6.96909	7.11144	6.70821	7.52777	7.21589	7.59136
RPL10A|4736	10.0778	10.2768	10.9284	10.067	10.8564	10.7848	10.5316	10.678	10.6945	10.2879	10.2631	10.1502	10.6046	10.6022	10.6077	10.7781	10.4644	9.46142	9.67278	10.0054	11.1791	11.4974	10.8608	10.8304	9.71817	10.6929	10.7524	10.0905	8.76345	10.656	10.159	9.84592	9.79075	9.92353	9.63278	9.65231	10.2071	9.71478	10.4846	10.9648	10.0136	10.7319	10.6332	10.2391	9.91301	10.324	11.154	10.7278	10.1671
RBX1|9978	8.22352	7.5362	7.32101	7.63459	7.82142	7.96231	8.27884	8.52075	8.17138	7.68821	7.67313	9.06606	7.86542	7.7373	8.36956	7.98564	8.54231	7.81539	7.82139	7.96127	7.94093	7.71374	7.96293	7.99389	7.69544	8.64947	8.1958	8.72784	8.09922	8.37088	7.89614	7.73289	7.92055	8.33251	7.44503	7.30149	8.19618	7.72907	7.8123	7.62151	7.88906	7.97092	8.05638	7.8149	7.95469	7.79219	7.95461	8.30467	7.37412
RPS18|6222	11.7019	12.3314	12.8207	11.8857	12.9013	12.1545	12.9619	13.1724	12.5693	12.9908	12.2302	12.0709	12.6331	13.1257	12.2035	12.6646	12.819	11.1595	11.3032	12.1905	13.0389	13.2138	12.9483	12.8695	12.3241	12.938	12.5586	12.1134	10.9339	12.147	12.0261	11.7835	11.5303	11.1399	11.2327	11.8686	12.558	11.4059	12.4661	12.7441	11.8052	12.865	12.3293	12.4739	11.8109	12.0442	13.6073	12.2974	11.5282
RPL7A|6130	10.1162	10.6915	11.5251	10.5126	11.4402	10.9104	11.4161	11.3473	11.9494	10.9782	10.6387	10.9428	11.0367	11.2356	10.3802	11.4593	11.564	10.8928	10.2859	10.3323	11.5962	11.7449	11.5349	12.128	10.9573	11.9177	11.4397	10.4275	9.90525	11.4641	10.6507	10.9389	10.2342	9.75776	9.61276	10.4964	10.9074	10.1817	11.2195	11.3849	11.2047	10.7344	11.053	11.4621	10.3258	10.8714	11.4447	10.6037	10.8658
SEC11A|23478	6.64286	6.81409	7.15412	7.19636	7.38628	7.37004	7.81567	6.8268	7.70118	6.64614	7.54981	7.2276	7.60764	7.03199	7.21311	6.87421	7.31146	7.27609	6.75788	7.44796	7.29967	7.28808	6.82946	7.70396	6.81471	6.82163	7.38696	7.39258	7.0222	7.06414	7.18883	6.5078	6.96691	7.61148	6.86081	6.94826	7.03024	8.06544	7.72439	7.4565	7.73243	7.29119	6.74697	6.55206	6.84761	7.13234	7.23782	7.31929	6.83863
ATP5G2|517	8.53049	9.26425	9.21454	8.21755	9.15558	9.36556	9.15054	9.9723	8.40016	9.3803	9.09391	8.90007	9.78577	9.77877	9.23513	9.31243	9.20599	8.75879	8.48484	8.70564	9.53159	9.65377	9.36266	9.41901	9.65726	9.93668	9.87525	9.21742	7.99296	8.9218	8.45574	9.32002	8.50302	9.44728	8.54329	8.55708	8.72345	8.04071	8.91161	9.08552	9.46983	8.37393	9.14154	9.46398	8.43005	8.93682	9.37125	9.12976	8.0597
UXT|8409	6.80785	7.02939	7.03686	6.76229	6.70097	7.75346	7.58274	7.3674	7.19838	7.80212	7.68742	8.31813	7.26379	7.05262	7.61451	6.88184	8.1089	7.19851	7.11158	7.00457	7.44931	7.20718	7.03668	7.1562	7.96371	7.60054	7.16946	7.40966	7.73306	6.93212	7.20587	7.20387	7.64796	7.16825	7.59585	7.49832	7.58832	7.16236	7.23837	7.48798	7.17262	7.55772	7.34643	7.31041	6.58941	7.13197	7.27767	7.8374	7.01649
NCL|4691	8.22207	8.74901	8.70555	9.0207	9.18682	8.66211	9.16283	7.88753	8.237	7.90743	9.11854	8.37446	9.17107	9.4205	8.65347	8.60633	9.14179	9.18075	8.66264	8.69142	8.54861	8.96122	9.05392	8.75714	7.6314	8.51219	8.62379	8.59534	8.80621	8.81042	9.11623	8.52961	8.76873	7.58792	8.11895	8.95311	8.9824	8.85929	9.16724	8.80588	8.59209	8.95258	8.95004	8.85631	9.2667	9.00843	8.65696	8.58067	8.95071
PARK7|11315	7.94129	8.79199	7.83005	8.62623	7.92777	8.6105	9.2287	9.26705	8.17626	9.23087	9.12571	9.38036	8.44292	8.20268	8.25111	7.89872	8.87437	7.90787	8.44203	9.29107	8.99253	7.9597	8.65482	9.33565	8.66589	9.35189	8.54312	8.64499	8.82556	8.66712	8.47987	8.62211	8.54749	7.34936	8.17993	8.7288	8.18738	8.31407	8.60553	8.118	8.79056	8.60423	8.44776	9.10385	8.19057	8.59763	8.23288	8.53984	8.07341
RPL15|6138	9.15599	8.87154	9.60557	9.07189	9.7414	9.26532	9.8419	9.33207	9.69763	9.34429	9.4596	9.33654	9.651	10.6159	9.25053	10.1875	9.68243	8.789	8.42643	9.30215	10.1098	9.721	8.8942	8.77307	9.44166	9.46918	9.01174	9.41946	8.81794	9.48273	9.53271	8.40157	8.48061	9.48478	8.86768	8.25121	9.30537	8.42964	9.23218	9.53949	8.86185	10.1844	9.23353	10.1334	8.37045	9.34077	9.92884	9.29258	9.34966
NEDD8|4738	7.29917	8.1865	8.09177	8.20437	8.25571	8.55597	8.64909	8.59237	8.41516	7.94095	8.06635	9.48646	8.35781	8.27788	9.10565	8.44712	8.25398	8.213	8.64578	8.3662	8.40855	8.00065	8.56584	7.64642	8.90475	8.38821	7.8925	8.27166	7.77166	8.4561	8.03444	8.10748	8.73637	7.81048	8.07324	7.55292	8.43291	8.15819	9.88999	8.4102	8.54664	7.63298	8.09069	7.77197	8.51839	8.43107	8.16166	8.58951	8.23079
CCT7|10574	7.32247	8.26873	7.52044	7.61486	7.85141	8.39606	8.66157	7.64805	7.51551	7.99319	7.93067	6.9421	8.31097	8.40907	8.55062	7.63546	8.57845	8.17114	8.34892	7.89291	8.24977	8.29079	8.16994	8.70324	7.85333	8.35771	8.96125	7.71989	8.29175	7.73491	8.49949	8.04419	8.90312	7.69783	7.1983	8.31826	7.81001	7.70766	8.78557	8.05461	7.6666	7.70573	7.89553	8.32863	8.6092	8.01154	7.84908	8.43969	8.29507
ATP5E|514	10.1915	9.49047	10.0281	10.1946	11.6706	12.3002	10.9664	11.2377	10.0704	11.6457	11.5175	11.0539	10.2538	10.4926	10.939	10.0633	10.2619	10.798	10.0726	10.4662	11.6277	9.88168	11.2015	10.3146	11.3467	10.6645	10.776	10.379	10.5086	10.127	10.5226	9.99863	10.7635	10.5027	10.3589	9.85903	11.063	10.3336	11.9496	10.9298	10.3094	10.2808	10.1638	10.4394	11.1158	9.77902	10.3991	11.3749	9.98146
RPN1|6184	8.40828	7.91308	8.15765	7.8501	7.91668	7.95704	9.44459	7.82883	8.22308	7.81338	8.29997	8.83129	8.02255	8.27124	8.17903	8.18089	7.2292	8.70305	8.11269	8.11023	7.97969	8.1314	7.9964	7.7955	8.04811	7.95623	7.57464	8.45352	8.28146	8.1887	8.38439	8.19115	8.81955	8.45796	8.15988	7.93534	8.61337	9.08241	8.76561	8.34565	8.48222	8.02816	8.82108	7.95045	8.99603	8.71208	8.03509	7.9305	7.90793
RPL6|6128	9.16148	9.15816	10.1006	9.26721	10.27	9.7248	10.1613	9.24579	10.2325	9.99312	9.56265	9.22034	9.85573	10.5871	9.70242	9.78554	10.3021	9.3506	9.13214	9.22737	10.6235	9.79891	9.60219	10.3672	9.56953	10.7173	10.2161	10.068	8.28436	9.68383	9.72576	9.63856	9.36414	9.65705	9.10645	9.86049	9.02174	9.11493	9.58529	9.99357	9.5212	9.72726	9.86552	9.80911	9.12173	9.77415	10.1676	9.93152	9.07309
RPL37A|6168	11.1201	11.7246	12.4393	11.415	12.4119	11.3709	11.9183	11.6396	12.4135	11.8738	12.2967	11.5203	11.0727	12.2948	12.1057	11.2557	12.7929	11.7969	10.4999	11.2394	11.8225	11.7264	12.558	12.3424	11.7678	11.8191	11.7591	12.3206	11.1128	12.3521	11.517	11.9038	10.8118	10.506	11.1577	11.2559	11.3746	11.4431	12.577	12.0665	11.5954	11.9983	11.7756	13.0426	11.1227	11.6199	11.8632	11.8714	12.1002
RPS8|6202	10.303	11.0915	11.9582	10.8701	11.1338	10.5435	11.6086	11.5043	11.8589	11.612	11.3221	11.5645	11.0755	11.5183	10.6243	11.5103	11.1169	10.7885	10.6907	10.6624	12.4599	11.0607	11.4415	11.6673	10.9452	11.9887	11.1179	11.2654	9.80576	11.2746	11.4385	10.5528	10.4493	11.0065	10.0367	10.3074	11.3183	10.9288	12.375	11.3358	10.9554	11.0241	11.2194	11.5585	10.3583	11.2319	12.2167	10.9397	10.3864
C11orf10|746	8.36795	8.49453	9.24157	8.03607	9.1993	8.30745	8.21458	9.51547	9.07969	8.68116	8.84026	9.30096	7.82291	7.66802	8.02895	8.70713	8.3863	8.86535	9.02278	8.54693	8.67873	9.1048	10.144	8.53901	8.87134	9.48192	8.76626	9.29862	8.72549	9.08342	9.32215	8.81724	8.90215	9.31814	8.89901	8.36874	8.83497	9.10875	9.52642	8.54398	8.52669	8.68511	8.61666	9.3923	8.37509	8.9385	9.03995	8.82452	8.96756
ARPC3|10094	8.55504	8.17965	8.69907	8.72864	8.80946	9.0028	9.38519	9.07513	8.95877	9.30601	8.76153	9.07502	9.12909	9.41155	9.02564	8.6311	9.18684	9.09072	8.81147	9.33811	9.07487	8.47656	8.3277	9.07814	9.87577	9.46869	9.45258	9.20117	8.92124	9.15753	9.87289	9.33872	9.49185	9.66954	8.98301	9.97815	8.43429	9.56729	8.80866	9.4059	9.63704	8.76124	9.49275	9.10269	9.08472	9.53204	8.85598	9.61998	8.14178
SFRS2|6427	6.65016	7.49489	7.34053	6.98353	7.78214	7.42016	7.25509	6.88486	7.00034	7.06815	7.46535	7.42656	7.48826	8.06957	6.6534	6.88453	7.5803	7.53598	6.89209	7.28487	7.19395	6.96037	7.44411	7.43398	6.88343	8.05643	7.91267	6.68815	7.61571	7.74467	7.6673	7.09204	7.47746	7.26763	6.76122	7.2836	7.15916	7.57516	7.21453	7.68705	7.02041	7.29104	7.45833	7.20134	7.65886	7.85389	7.22788	7.3143	7.74788
ATP6V1F|9296	7.07163	7.83507	7.75926	8.24899	7.93791	8.03469	8.37163	8.27822	8.53644	8.73176	7.99141	8.35934	7.74515	7.98882	8.96117	7.19739	7.93271	7.45122	8.67258	8.4564	7.95918	7.87639	7.44197	8.12262	8.40172	7.84157	8.0732	8.44504	9.02354	8.15211	8.62036	8.67273	8.08255	8.06866	8.28755	7.79295	7.87147	8.42152	8.04169	8.60749	8.23748	8.03224	7.53062	8.73699	7.80465	7.80691	8.60391	8.42144	8.23969
RPS14|6208	9.99381	11.0972	11.6904	10.2941	11.5474	11.1607	11.6361	11.6049	10.6158	11.67	11.5902	11.3715	11.1214	11.8619	11.4918	11.0229	11.4442	10.1134	10.8663	10.6433	11.836	11.7627	11.6837	11.2865	11.4213	11.4172	11.1146	10.9353	9.88719	11.373	10.6162	10.8273	9.81763	10.6207	9.83009	10.0938	11.1221	10.0276	11.5186	11.5473	11.2444	10.6366	10.9962	11.5115	10.1889	11.197	11.9897	11.5214	10.9775
ACTG1|71	10.8854	11.7425	12.3605	11.8586	12.1429	11.2558	11.3771	12.3548	11.6009	11.8465	11.7759	11.1707	12.0072	12.0223	10.5221	11.2033	11.9966	12.0335	11.1464	11.3838	12.4563	11.5204	12.8175	11.7276	10.7712	11.836	12.0694	10.8218	11.743	11.4735	11.5679	11.3881	11.9592	11.127	10.2921	10.7087	11.5264	12.2847	11.6641	11.5721	11.3709	11.903	11.5359	11.5862	12.5401	11.753	11.2236	11.8307	12.1595
QARS|5859	6.93475	7.25109	7.78362	7.44108	7.55696	7.28976	7.71092	7.67601	7.54853	7.54052	7.33934	7.44511	7.2302	8.37663	8.25102	7.87384	8.14558	7.03433	7.47742	7.14179	8.4099	7.72759	6.7478	7.32382	8.10867	7.00666	7.5443	7.81306	7.43305	7.55268	7.596	7.59676	7.32047	7.37545	7.37438	7.11903	7.53212	6.72542	8.11855	7.04865	7.40862	7.64932	8.14988	7.00951	8.26035	7.38041	7.55956	7.2975	7.59995
MYL6|4637	10.0452	11.2432	10.8679	10.4849	10.8285	11.3102	12.5715	11.3562	11.3248	11.2428	11.1498	11.1817	11.4877	10.9707	10.9868	11.3482	10.6095	10.9493	10.7783	11.3899	11.7682	11.2119	11.2118	10.6586	11.189	11.3157	10.211	10.9594	10.5706	10.9504	10.328	11.4102	11.8488	9.8091	9.84171	10.6589	11.2707	11.6612	10.7265	10.8182	11.7545	10.7776	10.9781	11.5227	10.9752	10.953	11.0806	11.6532	10.1333
KARS|3735	6.65901	7.28412	6.44115	6.61034	7.04287	7.11512	7.56242	6.41494	6.4265	6.64719	6.80847	7.0136	6.45052	7.27742	6.57667	6.20199	7.12401	6.55133	7.03756	7.05544	7.19193	6.3634	7.02499	6.6134	6.54092	6.82541	7.41307	6.59843	6.73536	6.84059	6.9637	7.47764	6.94562	6.9057	7.11717	6.86044	6.6074	7.30174	8.07634	6.83291	6.8677	7.8605	6.7105	6.94	7.13512	6.98742	6.58798	7.20119	7.00064
OAZ1|4946	8.72961	9.29862	9.3793	9.52647	9.0596	10.8667	9.61384	9.92935	9.46152	9.78842	9.42855	8.90371	9.31684	9.29148	9.16869	9.22642	9.45633	8.99898	9.07669	8.86846	9.74965	8.5795	9.11929	9.74507	9.38619	9.53703	8.58138	9.66594	9.43807	9.73482	9.10097	9.29294	9.43247	8.52583	8.16654	9.22209	9.05347	9.33035	8.89195	9.48073	9.25246	8.92801	9.85823	10.2115	8.95556	9.07546	9.36152	9.40787	9.47961
PSMB5|5693	6.72285	7.37693	7.19578	8.07699	7.24873	7.34733	7.84197	7.93755	8.10402	7.28358	7.523	7.35409	7.81638	8.02756	7.83031	7.21648	7.59395	7.66541	8.63726	7.82515	7.21254	7.71098	8.23274	7.64479	7.47348	7.4618	7.21896	8.01335	7.15516	7.96818	7.99355	7.13952	8.07168	7.28601	7.3701	7.23111	7.60015	7.32057	8.8391	7.46268	8.03661	6.88388	8.0273	7.36828	8.19241	7.46125	7.60234	7.33779	8.44155
CD63|967	9.72444	10.6	10.0149	9.71719	9.67982	9.511	10.6414	9.37685	10.1009	10.7204	10.6896	10.0937	11.0966	10.2476	11.4239	9.70203	9.69751	10.2858	9.68046	10.0359	9.96833	10.7302	9.7595	9.66977	10.9924	10.1703	9.31973	10.0694	9.44555	10.0125	9.6408	10.3201	10.3142	9.84105	9.91021	10.0651	9.50022	10.5028	9.47045	9.63964	11.1045	9.28301	10.2324	10.1656	9.58727	9.58642	10.1231	10.9698	9.28024
NDUFB4|4710	8.97404	9.06218	8.55583	8.43326	8.36571	9.0806	10.2625	9.71629	9.00527	9.91283	9.13311	9.26732	8.97264	8.8449	9.53441	8.73301	9.36268	8.61645	8.90741	9.02012	9.13249	9.21672	8.92725	9.18466	9.4556	8.91731	9.0791	9.22281	9.20769	9.11569	9.56681	8.71836	9.26125	9.73442	8.28433	8.46389	9.10363	9.48511	9.46761	9.12344	8.83573	8.13897	9.1353	9.53316	9.59109	8.91747	8.83745	9.11466	8.77131
ATP5C1|509	7.61118	8.05185	7.61344	8.95743	9.04475	8.07531	8.03824	8.5863	8.59931	8.35055	8.81214	8.76291	8.41697	8.55638	8.35578	8.01385	8.19341	9.16112	9.09059	8.41775	7.9603	8.23049	8.06805	8.54801	8.06746	8.7391	8.13377	8.47533	8.44121	8.06066	8.56306	8.31952	9.07333	8.33509	8.42392	7.88947	8.47009	9.6105	7.84202	8.67578	8.28799	7.91305	8.66151	7.87635	8.30747	8.2172	8.25391	8.04836	7.99125
CAPZB|832	7.86769	8.63418	7.4413	8.20628	7.92469	7.70543	8.58639	8.24516	7.50757	8.44732	8.41317	8.17896	8.47894	7.32618	7.36384	7.92878	8.20303	7.28745	7.84279	8.05492	8.5548	7.61132	8.54328	8.6245	8.33299	9.31127	8.44234	7.89868	8.33638	8.04237	8.3612	8.5728	8.4205	7.72219	7.47239	7.61484	8.027	8.10609	8.49693	8.02653	8.86044	7.98296	8.78919	8.31864	7.77552	8.34661	7.86757	8.74195	7.59861
RPL36AL|6166	8.58673	9.14645	9.06834	9.2241	9.19873	9.67099	10.0917	9.78581	9.54792	9.30013	9.02363	10.9571	9.03527	9.48197	9.92333	9.17889	9.5328	8.50208	9.28901	8.85644	9.25205	9.13622	9.4234	9.26084	10.3577	9.3812	8.75404	10.0178	8.72648	8.97959	9.12152	9.15412	10.5609	8.78797	9.1335	8.9383	9.2118	8.85389	9.84249	9.07677	9.2724	8.92263	10.0778	8.70833	8.94014	9.59884	9.29914	9.35607	9.42446
UBR4|23352	5.97697	6.51691	5.64604	6.57803	5.94168	6.68363	6.48175	6.4573	5.79527	5.78897	6.58997	6.595	6.44689	5.9271	5.82872	6.32898	6.08576	6.27119	6.88825	6.50225	6.10472	5.88909	6.19956	6.57103	5.76364	6.5597	7.04343	6.09531	6.72958	6.28908	6.44974	6.50492	7.05077	6.19814	5.84528	6.12571	6.1333	6.28423	6.5187	6.13142	6.42048	6.40641	6.41581	6.82821	6.58779	6.21259	6.14263	6.03735	5.99411
NHP2L1|4809	7.74815	7.11958	7.00335	6.74146	7.48287	8.186	7.624	7.44928	7.58243	6.60684	7.17427	7.15742	6.9895	7.37166	7.54742	7.01798	7.5053	7.4207	7.69153	6.99036	7.03708	7.11004	7.58802	7.05463	6.44809	7.33871	7.17923	7.16503	6.89409	6.96395	7.3425	6.48898	6.6184	6.93285	6.82743	6.0616	7.20615	6.61467	6.91763	6.97239	6.78375	7.41779	7.00491	7.5796	6.95116	6.69752	7.2643	7.22704	6.69735
COX7A2L|9167	6.96883	7.11211	7.13184	6.82514	7.43688	7.56049	7.40043	7.31635	6.75097	7.56998	7.72905	7.20008	7.28984	7.12432	7.79606	7.53054	7.09223	6.77578	6.99824	6.78942	7.2917	7.52424	7.74525	6.96622	6.48554	7.46932	8.20731	6.69824	7.79128	7.29033	7.46655	7.10056	7.86074	7.99495	7.01249	7.23223	6.89855	7.45936	7.19079	7.61094	7.40819	6.9625	7.13047	7.08941	8.57625	7.50767	7.58878	7.53948	7.32315
BTF3|689	8.62864	9.83556	9.61504	8.92003	9.81842	9.60304	10.0143	9.49655	8.74522	9.23533	9.35431	9.63309	10.2101	10.3276	10.3173	9.5863	9.12397	8.98244	9.20989	9.23598	10.0162	9.93371	9.43603	10.16	9.40748	9.76854	10.206	8.80127	8.6881	9.44399	9.14126	9.03883	8.85641	9.22296	8.73344	7.87801	9.14866	9.06992	9.2367	9.91662	10.1933	9.11835	9.51047	9.33288	9.13958	9.76561	9.23768	9.61879	8.8099
SUMO1|7341	6.6266	7.31073	6.88885	7.18904	7.10212	6.95733	7.7307	7.59659	7.7249	7.17631	7.72562	7.31662	7.77059	7.43859	7.37125	7.05579	7.83078	7.58138	7.16062	7.01834	6.30769	7.43233	7.3836	7.56518	7.1997	7.09144	7.58732	7.85633	7.66824	7.14615	7.50729	7.51919	7.46769	7.81793	6.7757	7.06653	7.42615	7.99151	7.4328	7.61694	7.59407	7.09233	7.14153	7.69615	7.5908	7.63612	7.60031	7.40255	6.90631
PSAP|5660	10.4341	10.8362	10.3614	11.2676	11.2559	10.7367	10.032	9.49992	10.5636	10.1787	10.6978	8.96566	9.87053	9.18276	10.5279	9.81307	10.2381	9.55277	10.5707	10.7053	10.0993	9.50187	10.1577	10.4763	9.37517	9.74946	9.85759	10.2202	9.59398	10.2807	10.2892	10.6162	10.4015	9.96544	10.9898	10.1692	9.74601	10.3482	9.90365	10.1507	10.5752	10.2753	9.77178	10.0525	11.0202	10.5533	10.7481	10.5775	10.1384
SRP14|6727	7.5039	7.97261	8.39046	8.31108	8.42917	8.43443	8.90132	8.53095	8.43688	9.01342	8.76635	8.87401	8.8939	8.03471	8.49537	9.39688	8.20573	7.66589	8.27751	8.61822	7.9039	8.27968	8.17977	8.50994	8.50752	8.5241	9.07744	8.51821	7.91377	8.28302	8.41454	8.35027	8.13458	8.50054	7.794	7.87869	8.38658	9.10716	8.04277	8.10139	8.41411	7.86696	8.6393	9.3724	7.76512	8.65353	8.22317	8.81664	8.36618
MYL12B|103910	9.40327	9.09527	9.45362	9.98703	9.7739	10.3535	10.6682	9.50056	9.60715	9.47805	9.56747	10.8218	10.0477	9.39883	9.18305	9.377	9.41006	9.99787	10.4965	9.56462	9.65083	8.97929	9.10941	10.2437	10.8713	9.63796	9.30337	8.98666	10.2561	9.61375	9.41778	9.74755	10.3199	9.58214	10.0108	9.05662	9.36402	10.537	10.0177	9.59331	9.66193	9.47441	9.67101	9.27681	9.83429	9.70071	8.95734	9.92921	8.75137
PKM2|5315	9.36926	9.68984	10.1113	9.74827	10.1489	10.9641	11.1274	10.704	9.85257	9.31399	9.92377	10.4879	9.85997	10.0275	9.62386	10.6676	10.038	10.778	11.4982	10.3084	10.5519	10.4723	10.1639	10.9178	10.0758	9.86975	9.59336	10.6899	10.4383	9.66422	9.94725	9.58136	10.4514	10.885	8.39764	9.64148	10.5254	10.2518	10.5852	10.2919	10.1842	10.4322	9.68956	9.77431	10.5013	9.51544	8.95416	10.1569	10.0558
SFRS3|6428	6.64603	7.182	7.05523	7.21846	7.51659	7.28682	7.36628	6.6889	6.86881	7.03708	7.26401	7.40875	7.94787	7.76477	6.89366	7.28798	7.09086	7.16205	6.57074	7.10126	7.27969	6.82634	7.03234	7.18288	7.07448	7.75645	7.87249	6.77255	7.0726	7.61345	7.42945	6.95837	7.80749	7.49696	6.65917	7.29898	7.42478	7.35163	7.21265	7.65591	7.05468	7.43979	7.12395	7.03956	7.54001	7.82362	7.18301	7.34115	7.33673
RPL3|6122	10.5824	11.227	11.6654	10.9625	11.3606	11.337	10.9722	11.3135	11.5214	10.9293	10.84	10.8871	11.6243	11.3963	11.6188	11.5213	11.5634	10.3183	10.4993	10.5982	11.9487	11.7365	11.4367	11.8113	10.5096	11.3072	10.5778	11.3837	9.73713	11.0761	10.2928	10.3679	10.1393	9.75827	9.58775	9.86549	10.8378	9.96744	11.1724	11.2533	12.2634	10.7644	11.4496	10.8678	10.4038	10.4766	11.6101	11.2117	10.7686
C3orf10|55845	7.72104	7.38603	7.77778	8.19075	7.9801	7.75335	8.57869	7.95423	8.44656	8.12594	8.38833	8.1752	8.35648	8.01277	8.23863	8.60022	8.79214	7.71157	7.72951	8.44564	8.32346	7.90336	7.73735	9.15782	7.90328	8.33123	7.76765	8.03243	8.08978	7.94448	8.30296	7.4996	7.88918	8.57406	8.01599	7.37847	8.00234	7.8284	7.71479	7.23856	7.78478	9.01708	7.81227	9.0952	7.69833	8.2229	7.53444	7.99308	8.12225
ARPC2|10109	7.80286	8.25374	8.26325	8.56992	8.35944	7.73145	8.71314	7.24836	8.03524	7.88858	9.24072	7.56625	8.52925	8.06278	8.39698	8.20034	8.63812	7.97146	8.22985	8.68808	7.96555	8.05381	8.4491	8.32088	7.92488	8.10499	7.86728	8.13729	7.93434	8.50919	8.72774	8.4286	8.6587	7.91525	8.22327	8.39096	8.09202	9.12306	8.37257	8.28082	8.57836	8.54959	7.94765	8.55081	8.50989	8.66834	8.54687	8.91459	8.16599
PPIB|5479	9.28016	9.10604	9.92495	9.24158	9.52789	8.79914	10.7015	10.1661	9.32873	9.51394	9.85377	10.3495	9.75008	9.47673	9.6616	9.10862	9.71267	9.71958	10.0318	9.38724	9.76429	9.94406	8.78186	9.56898	10.0872	9.49109	9.10651	10.8069	9.68022	8.97877	9.88905	9.17664	9.95028	9.21042	8.99306	9.36236	9.24865	10.3539	9.62617	9.15144	9.65178	10.0133	10.8542	10.6991	8.86647	8.94061	9.40116	10.1634	9.33811
GAPDH|2597	10.8262	11.3948	12.5046	11.7574	12.2242	13.1861	12.3167	13.6878	11.9551	11.8829	10.8273	12.0307	12.2825	13.4874	12.8202	12.5685	12.4965	13.1622	12.3902	11.6827	13.0437	12.6077	12.1282	13.7344	11.804	12.9276	12.0989	13.3177	11.838	12.1353	11.9089	12.0964	13.4455	13.1272	10.3703	11.1526	13.051	11.4833	12.2457	12.5589	12.7842	12.3207	11.2434	11.7171	12.1459	11.376	12.4541	12.4193	11.2825
RPL4|6124	9.41647	9.86262	10.8829	10.3426	11.4153	10.3249	10.4933	10.5336	10.1767	9.99773	10.4134	10.1951	10.7288	11.1543	10.4732	10.6391	10.919	10.153	11.2268	9.96513	11.2534	11.0478	10.3278	11.2266	10.0035	10.6432	10.4851	11.0731	8.97279	10.2986	10.1054	9.55013	9.45656	10.7584	9.47865	9.45072	10.409	9.32956	10.6894	10.4411	9.75671	10.7123	10.5607	9.8881	9.81791	10.2432	10.5552	10.4597	10.0308
SNRPC|6631	6.7136	7.28293	7.2287	7.21502	7.53103	8.17749	8.09313	7.91361	7.71815	7.62938	7.28796	8.22485	7.88542	7.86029	7.812	7.43869	7.65433	6.87289	7.42256	7.28418	7.77774	7.63053	7.71737	7.8364	8.101	8.03623	8.35186	7.26151	7.20144	7.49493	7.89585	7.83722	8.4687	7.64513	7.03674	6.85672	7.80005	7.91936	7.56207	7.91587	7.35248	7.70579	7.36019	8.29373	7.64147	7.60799	7.97043	7.65167	6.86754
DDOST|1650	7.83823	8.01055	7.55885	7.54445	7.27427	7.1962	8.75686	8.07767	7.3008	7.68765	8.11934	8.04686	7.37121	7.22684	7.56792	8.36249	7.95449	7.98306	7.91239	8.60725	7.91111	7.1179	8.04541	7.67159	7.11957	7.67736	7.89651	8.17243	8.34431	7.86814	8.1138	7.85809	8.67319	7.94551	7.59743	7.34462	7.1326	7.68418	7.96419	7.78518	8.16735	8.22704	8.83858	8.22534	7.24943	8.35591	7.54559	7.83949	7.68686
RPL14|9045	9.14587	9.04662	10.0053	9.35692	10.1601	8.9628	10.0703	10.1829	10.3246	10.0283	9.75771	9.76244	9.72935	10.3793	9.76875	9.33932	10.3102	8.72475	9.0285	8.51557	10.6574	10.0372	9.48289	9.4917	10.3117	9.63563	9.38827	10.2116	8.85411	9.75511	9.35074	8.89167	8.59707	9.25311	9.01196	8.52191	9.34924	8.51206	9.53736	9.66632	9.22571	10.6794	9.68412	9.43246	8.97505	9.52559	9.72678	9.30012	9.6563
RPS15A|6210	10.293	12.2384	11.3001	11.3532	12.0748	10.6333	11.7623	11.3227	11.6993	11.6666	11.3954	10.6838	10.9923	11.4775	10.5223	11.4497	11.0744	11.124	10.3813	10.4508	11.9368	11.5424	12.125	11.66	11.3892	11.8404	11.6998	11.6209	10.6586	11.3004	10.7049	11.2845	10.6028	11.6297	11.0216	10.4641	11.804	10.0899	11.0969	11.9514	11.3519	11.6865	11.0678	11.4425	11.2487	10.9674	12.1724	11.0773	11.7245
SNX17|9784	6.25453	6.9054	6.86874	6.5104	6.4749	7.22557	6.73744	6.06972	6.6825	6.61217	6.5891	5.82131	6.71927	6.69021	7.22529	6.80208	6.37717	6.53535	7.00551	6.73458	6.74302	6.35108	6.51496	6.82459	6.0058	6.85246	6.56672	6.58181	6.61311	6.39373	6.69669	6.51305	6.99564	6.06698	6.72711	6.48448	6.68468	6.99569	6.23784	6.73258	6.43839	6.20114	7.07481	6.91403	7.5599	6.5073	6.63734	6.98781	7.0368
DHX9|1660	6.76999	6.77948	7.18529	7.06079	7.18567	7.58561	7.11566	6.86835	6.91645	6.67935	7.19329	7.20431	7.74616	7.42593	6.80372	7.36733	7.07058	7.32224	7.2015	7.4191	6.71045	7.30687	6.98201	7.02599	6.39423	7.17591	7.31668	6.55489	6.95066	7.2506	6.76837	6.70487	7.31266	7.37034	6.55493	7.15108	7.25589	7.03418	7.18977	7.56733	6.79274	7.33249	6.88431	7.29876	7.12401	7.35677	6.91566	7.04232	7.13325
ATP5O|539	8.38091	8.49662	8.25448	8.69858	8.27194	8.06811	9.14086	9.23171	8.40863	8.77086	9.2783	9.42614	8.31221	8.62558	8.96813	8.89203	8.99991	8.31681	9.19463	7.90043	8.42982	9.00635	9.26745	7.68145	8.33157	8.51003	8.97903	8.30755	8.60662	8.66283	8.8824	7.16332	8.97737	8.78498	7.61854	8.98151	8.34697	8.5334	8.9182	8.31585	8.50564	8.84824	8.41358	8.96579	8.38009	8.28604	8.50868	9.25868	7.91452
PPP2R1A|5518	7.40852	7.75544	7.59411	7.29313	7.57651	8.23583	8.15913	7.64549	7.57028	7.59939	7.73346	7.45731	8.26237	8.15365	7.612	8.03932	8.1089	7.81979	7.57595	7.77159	9.55203	7.04095	8.09556	8.13658	7.96036	8.07619	8.41634	7.18119	7.37084	7.74768	7.46639	7.83525	7.79293	7.47029	7.7807	7.19571	8.02127	7.31978	8.2156	8.14288	8.04189	7.6405	8.34579	8.70801	7.77085	7.37742	8.008	7.56817	8.1963
MLF2|8079	7.02005	7.9205	7.57088	7.55197	7.0679	8.17091	7.75184	7.86026	7.99292	7.4807	7.44494	7.20054	7.82618	8.44019	7.70922	7.47034	8.53385	8.31537	7.70428	7.83783	8.02124	7.6325	7.62117	8.3195	7.83474	8.13545	8.10069	7.9101	7.49246	7.21933	7.59534	8.49791	8.50157	7.82377	7.36057	7.14107	8.22385	8.20315	8.18193	8.27928	8.17517	7.63953	7.89257	8.03512	7.38797	7.50755	7.84793	7.82022	6.93156
EEF1A1|1915	10.4854	11.0923	11.1514	10.9414	11.5998	11.6009	11.4989	11.2994	11.4985	11.1891	11.2757	11.3178	11.3047	11.6523	11.183	11.2941	10.919	10.4828	9.59376	10.8899	11.9486	11.4789	10.701	11.7368	11.3067	12.0754	11.6828	11.9855	9.79582	11.1326	11.1527	10.441	10.3826	11.4179	10.3201	10.1089	11.412	10.2979	10.9548	11.2136	11.0439	10.846	11.4932	10.6925	11.0082	10.9146	11.2916	11.1232	10.1042
TARDBP|23435	5.88249	6.1311	5.74023	6.18196	6.24846	6.34425	6.3026	5.6748	5.7215	5.94594	6.30599	6.31213	6.54253	6.34794	5.9341	5.97258	6.43258	6.15993	6.05883	6.22985	6.10995	6.04938	5.96774	6.31048	5.78975	6.62954	6.54882	5.65681	6.32871	6.44237	6.42186	5.93177	6.49016	6.13344	6.01936	6.58058	6.14642	6.28424	6.39955	6.42819	6.10835	6.42539	6.10691	5.98325	6.63578	6.68645	5.86139	6.12657	6.12858
HNRNPK|3190	8.3615	8.61966	8.53317	8.77498	8.86683	7.90831	8.93185	8.37527	7.92055	8.14773	8.55609	8.51756	9.39832	8.99459	8.53663	8.6026	9.01523	8.49857	8.17642	8.57543	8.57253	8.99027	8.46922	8.59435	8.36962	9.01054	9.25479	8.19295	8.90829	8.93449	8.6953	8.48346	8.80071	8.99262	8.47589	8.83526	8.87597	9.05518	8.88194	9.04075	8.77534	8.79776	8.33897	8.37019	9.18888	9.07888	8.41938	8.57638	8.74639
SEC61A1|29927	8.27472	8.18067	8.10936	7.64884	7.54834	7.63602	9.18878	7.35545	7.7692	7.19338	8.25704	7.983	7.83496	8.17367	8.27109	7.86179	7.10258	7.59531	7.99408	8.22847	7.64326	8.29905	7.7497	7.58215	6.89674	7.44956	7.10124	7.91223	7.82626	7.49169	7.96779	7.90685	8.35722	8.6083	8.04932	8.00989	8.35188	8.84283	7.98771	7.89151	8.09346	8.1729	8.82604	7.61128	8.3639	7.63111	7.85375	7.92376	7.80139
SND1|27044	6.30573	6.89961	7.32069	6.95396	6.89164	6.39746	7.71007	7.36391	6.85641	6.77661	6.47486	7.56667	6.9269	6.79906	7.52938	6.11741	6.9676	6.63503	7.36536	7.64176	7.02024	6.46641	6.56851	6.34868	6.42279	6.66706	6.61252	6.77682	6.86906	6.80469	6.95595	7.35552	6.80277	6.60278	7.01132	6.61039	7.3405	6.97991	7.31089	7.33808	6.8628	7.62179	6.90089	7.02241	6.69482	6.93785	6.97178	7.01512	6.80428
NDUFB3|4709	5.88344	6.61543	6.4401	6.68566	6.55164	6.52084	7.51342	7.3525	7.03915	7.14018	7.24344	6.6958	6.81064	6.5088	7.50328	6.53414	7.39039	7.13501	6.71996	6.77029	7.10693	6.88645	6.99549	6.75966	6.71166	6.32966	6.74763	7.30721	7.67744	7.10405	6.69532	6.86221	6.42476	6.95938	6.75626	6.8406	6.33522	7.11867	6.87967	6.31587	6.80793	6.46893	6.85217	6.84361	6.37774	6.91216	6.84127	6.69901	6.52036
RAC1|5879	7.77152	7.99148	7.36912	8.17271	7.68166	8.24513	8.5728	7.59554	7.9218	7.51459	8.70989	8.21086	7.97025	7.84933	8.4306	7.86609	7.59609	8.23316	8.52875	8.65716	7.92244	7.92072	7.84429	8.73061	8.40498	8.2464	8.34668	8.10881	8.5271	7.88407	7.86723	7.90159	7.99211	8.3356	8.07152	8.44748	7.64589	9.12656	7.84382	8.54984	8.37542	8.20189	7.30872	8.22423	7.97046	8.36597	7.5954	7.90397	7.6089
HSP90B1|7184	9.82599	8.77965	9.54748	9.03369	9.41975	9.29493	9.84608	8.71228	8.85585	8.70094	9.2013	8.76954	9.47801	9.4159	9.21974	8.85955	9.2291	9.85103	9.34953	8.81983	9.11182	9.27307	8.7721	8.9147	9.00627	9.63418	8.98817	9.68112	8.4639	8.75345	10.2717	9.0576	9.7386	9.88318	9.54237	9.7381	8.84768	10.2648	9.02465	9.89493	9.66186	9.44783	10.0084	8.55343	9.41184	10.1438	9.34403	9.39454	8.58053
FTL|2512	11.9322	12.4996	12.0741	12.7767	12.4904	11.9093	11.2973	12.1627	13.2616	12.8508	12.2985	11.0354	11.1221	10.886	11.7083	11.9789	13.1074	11.5654	12.4031	12.3195	12.4304	11.05	11.9919	11.1668	11.9374	12.4488	12.0625	12.9265	11.9842	12.9598	12.6387	12.5307	12.4072	11.9914	15.1064	11.6229	11.5856	12.1302	12.0044	11.3249	12.2466	11.9683	12.3785	12.3092	11.9114	12.2143	12.143	12.4198	12.4046
ERH|2079	7.3615	8.36302	7.72723	8.22008	8.26868	7.21006	8.74754	8.68869	8.5572	8.1431	7.78576	8.75737	8.39037	7.8252	7.54836	8.13715	8.41692	7.33107	8.12398	7.91016	8.2177	8.10579	8.23772	8.31753	8.85463	8.86443	8.63934	8.21989	7.57737	8.20306	8.48605	7.66997	8.19212	8.30245	7.77213	7.60052	8.65752	7.77834	8.25988	7.92863	8.36987	7.74736	7.87588	7.52657	8.18129	8.54841	8.33247	8.30472	7.38776
NDUFA4|4697	7.95388	8.27907	7.9758	8.48641	7.96348	7.32217	9.20556	8.70732	8.36864	9.38626	8.89065	8.49425	8.56546	8.73528	9.75794	7.7886	8.07604	8.66267	9.25706	8.83535	8.14034	7.61841	8.99748	9.3862	8.47465	9.19269	8.83404	8.74718	8.50619	8.29337	8.29804	7.82337	8.22707	8.63449	8.57796	8.62481	8.00939	8.11146	8.60569	8.67644	8.41141	7.98588	8.75442	8.72749	8.40603	7.84157	8.98846	8.78437	8.85915
TUBB|203068	9.33355	9.96209	9.9341	9.91105	9.50953	9.53623	9.97084	10.4711	10.4403	10.7653	9.57393	10.0379	9.89346	10.3521	9.36269	9.50903	10.0322	9.57693	10.0663	10.096	10.5997	9.18916	10.122	10.1313	8.83406	10.5609	10.7171	9.73592	9.68113	9.8418	10.283	9.37063	11.2056	10.118	8.63822	10.08	9.89074	10.3822	10.283	10.1677	9.57993	10.449	9.7608	10.356	9.7697	10.0079	10.0681	9.6516	9.23189
RAN|5901	7.99621	7.82037	8.61517	8.72983	9.07942	8.66339	9.31625	7.47812	8.85095	8.59031	8.91424	8.56068	8.62131	10.0427	8.64979	8.08925	8.61106	9.19794	8.96289	8.64936	9.12788	8.42374	8.30373	9.45256	8.04178	9.19243	9.38821	8.66288	8.21851	8.9525	8.60209	8.6963	9.09814	8.91683	8.07846	8.84649	8.24352	8.98195	8.96624	9.01697	8.66909	8.89989	9.24913	8.35075	9.00855	9.09438	8.66051	8.87413	8.1964
XRCC6|2547	8.82647	8.33191	8.21154	8.25511	8.49763	8.67817	9.02999	7.94631	8.35631	7.46603	7.8646	7.45087	8.85278	8.73832	8.56397	8.36596	9.09845	8.95871	8.28366	8.54145	8.64657	8.53799	8.25943	8.77383	7.23239	8.52629	8.46851	8.00097	8.45474	8.3848	8.3607	7.75512	8.21284	8.29728	8.10169	8.0229	9.05677	7.94991	8.13287	8.00692	8.05626	8.80187	8.39986	7.9984	8.86678	8.21273	7.97227	8.02991	7.56286
UBA52|7311	7.34625	7.56481	8.06696	7.48748	8.01714	8.71698	8.04738	8.24323	7.52181	8.15629	7.68471	8.2332	7.08474	7.92388	8.09769	7.24582	7.93888	7.94841	7.75588	8.30198	8.15315	7.71175	7.51664	7.70693	6.96687	7.91924	7.35453	8.369	7.12985	7.80827	7.93825	7.45264	7.81106	8.06376	7.80193	7.12396	7.71624	6.84856	7.76175	8.01431	7.21305	7.62099	7.68809	8.59497	7.92843	7.88185	7.89318	8.01309	7.71871
RNASEK|440400	6.86472	7.3663	7.1211	7.63288	7.5569	7.47563	7.36868	7.65802	7.52391	7.96275	7.83278	7.44363	7.52542	7.96187	8.25328	6.3452	7.21979	7.20511	7.6567	7.2571	7.32035	6.95397	7.48515	6.63414	8.34878	7.55228	7.4333	7.41461	8.03995	7.28649	7.51566	8.05283	7.55344	7.54776	7.93499	7.26955	6.68159	7.99552	7.87161	7.39664	7.83377	7.40714	7.46836	7.94638	6.88858	7.2926	7.56885	7.55325	7.10063
RPL12|6136	9.43895	10.5096	11.0298	10.213	11.1528	10.3562	10.9538	11.3374	10.9366	11.2211	10.6829	10.5645	10.8108	10.9781	9.60139	10.8186	11.518	10.4708	9.73633	9.81631	11.2396	11.1894	10.8517	11.2245	10.6136	10.9745	11.0477	10.3813	9.34675	10.6599	10.5736	10.4005	9.71744	9.80185	9.4382	10.2526	10.396	10.0427	11.3607	11.1578	10.1928	10.4792	10.8669	11.6147	10.3724	10.4309	11.3622	10.4927	10.3022
MRPL32|64983	6.17993	6.10427	5.97391	6.64888	6.47667	5.9162	6.70705	6.59103	6.79345	6.55234	6.38863	6.89331	6.45112	6.85452	7.15344	6.46752	6.46159	6.72219	7.14951	6.57766	6.06351	6.11446	6.29004	6.72342	6.53242	6.45996	6.75997	7.17582	6.53545	6.79354	6.87667	6.14406	6.21295	6.14418	6.59378	6.73807	6.17943	6.44723	6.2244	6.58884	6.42728	6.4567	6.83751	7.22294	6.58807	6.21629	6.73099	6.17991	6.78924
EIF4E2|9470	6.23877	6.58268	6.28565	6.38888	6.49848	5.92874	6.84283	5.87653	6.13462	6.0628	7.05893	6.37778	6.71515	6.59701	6.77808	6.35023	6.85763	6.01143	5.99096	7.25069	6.33932	6.40023	6.78692	5.80968	6.23998	6.38031	6.53712	7.2794	6.7571	6.49769	6.43701	7.01461	6.57459	5.73992	6.09984	6.80992	6.24928	7.04853	6.84183	6.62805	6.38616	6.45258	6.53363	7.72994	6.7927	6.92118	6.64191	6.77104	6.52744
RHOA|387	9.11678	8.61825	9.22914	9.73991	9.20007	8.9707	9.02469	8.4533	8.6614	9.14134	9.54969	9.59673	9.0373	9.79587	9.88335	9.14685	9.53405	8.58925	8.96517	8.92772	9.43322	9.27969	8.51522	8.65179	8.83257	8.68689	8.89694	9.01532	9.15217	9.37099	8.78044	8.513	9.07421	9.80838	9.2928	8.75115	9.14582	9.26158	8.90172	9.40854	8.92183	9.4215	8.86658	8.52063	10.2614	9.32312	8.49775	9.17695	9.18566
RHOC|389	8.1724	8.63558	8.62597	8.12104	8.49733	8.55093	9.30467	8.91496	8.73094	9.0234	9.03468	9.38542	8.82828	9.04068	7.42001	9.47168	8.18033	8.27115	8.4018	8.63649	8.91622	8.10656	8.76611	9.60791	9.27824	8.84518	8.42804	8.48892	8.3974	7.84915	8.44162	8.78828	8.6495	8.70086	8.04941	8.124	8.74626	9.02401	7.7127	8.86128	9.28654	8.1174	9.82211	9.00719	8.21799	8.48251	8.96418	8.81302	8.19539
ATF4|468	8.32703	8.59245	8.70462	8.91303	8.80855	8.74435	8.57516	8.36335	8.03382	7.78626	8.1104	8.90396	9.0851	8.53022	8.70262	8.84046	9.24323	8.92741	9.09837	8.40518	8.69835	8.73381	8.39122	8.97275	8.38919	9.28729	8.63021	8.98003	7.76776	8.76903	8.67107	8.47348	8.23312	8.25107	8.72193	8.35133	8.23387	8.69727	7.56058	8.26059	10.4406	8.83208	9.53691	8.00064	8.29855	8.5604	8.51788	8.97726	7.99757
EEF1B2|1933	7.66213	8.50768	9.25892	8.67577	8.97832	7.79347	8.96849	8.3848	9.51666	8.88525	8.40559	8.22483	8.22171	8.70382	9.13367	9.09386	8.56268	8.36246	7.95835	8.22191	8.29433	9.07689	8.95914	8.97565	7.82611	8.32308	8.0343	8.52743	7.52414	8.88476	8.5668	8.12498	7.63937	8.13884	8.55814	7.89078	8.79887	8.38839	8.60925	8.46959	7.90174	9.02149	8.61676	8.77014	8.23742	8.40577	8.8392	8.53622	8.84775
RPS25|6230	10.0438	10.8147	11.3121	10.3472	10.6837	10.0475	10.5459	11.3404	11.6631	11.4971	11.1115	10.4991	10.0819	10.4543	9.96137	10.9432	11.7545	10.6441	10.6416	9.92358	12.0058	11.2694	11.2685	10.2639	10.8267	11.191	10.3444	10.8277	9.45141	10.807	11.0983	9.90335	9.99483	9.51993	10.5641	9.97378	11.0568	10.7004	10.9488	10.5731	10.2463	11.3219	10.69	11.126	10.3471	10.9189	10.8656	10.4847	9.96103
NDUFAB1|4706	6.53527	6.4067	6.90679	7.48181	7.41395	7.64408	8.42871	7.48207	7.59564	7.8023	8.16531	7.43616	7.17757	7.7257	7.7641	7.00955	6.71059	7.76724	7.4758	6.92302	7.30196	7.39835	7.49595	8.00714	7.43582	7.81333	8.11793	7.5752	7.70263	7.66051	7.85406	7.68204	7.53903	7.8487	7.05995	7.51632	8.20457	7.62724	7.57922	7.70036	7.29074	7.53185	7.25575	6.98552	7.73286	6.85625	7.63266	7.32845	8.12439
DCTN2|10540	6.26492	7.22854	6.66401	6.96031	6.51663	6.82445	7.11564	6.72414	7.04761	6.21203	6.97621	6.2285	7.66944	7.18803	7.37105	6.96139	6.87795	7.18323	6.54241	7.19589	6.98663	6.78817	7.37717	7.33287	6.62223	7.21032	7.27056	6.93335	6.46122	6.92438	6.66444	7.27036	7.29663	6.32718	6.57486	6.90397	6.90716	7.47538	6.53606	6.97412	7.42139	6.87665	6.89699	6.90523	6.97219	7.09051	6.74138	7.17832	6.29428
RPL35A|6165	10.2595	11.1239	11.1991	10.6902	11.3536	10.764	12.2013	12.4579	11.6437	11.6785	11.1022	11.063	10.8947	11.2803	10.6399	11.5407	13.3425	11.0254	10.2693	10.8267	11.4939	11.73	10.8669	11.3851	10.9297	12.6823	12.0288	11.1968	10.2558	11.2696	11.3547	10.8414	10.8565	11.1641	9.89454	9.82499	11.3281	11.2035	11.8353	11.6647	11.0969	10.7789	10.9148	11.3976	11.8049	11.3804	11.8179	11.4377	11.0206
GANAB|23193	8.1953	8.70505	8.40757	7.99705	8.35195	8.15696	8.15122	8.87638	8.32506	7.97019	8.78786	8.23148	7.82753	7.63414	7.78166	8.48915	7.98743	8.23274	8.82718	7.99296	8.2193	8.54508	9.19765	8.61986	8.3265	8.47181	7.99526	8.0203	7.5888	7.85107	9.22113	7.88768	8.7792	8.53195	8.19361	8.25699	8.77369	8.71744	9.50528	8.79815	8.5711	8.6586	8.62674	8.25529	8.50329	8.83009	8.4542	7.92029	8.22969
CLTA|1211	7.1325	7.48652	7.20059	7.52626	7.5416	7.29984	7.11039	7.75781	7.02071	7.0633	6.79266	9.02896	7.61056	7.4126	7.83359	6.69319	7.48229	7.40305	7.36817	7.10617	7.42711	7.55966	7.82718	7.12703	8.03863	8.33473	7.97029	7.67202	7.54026	7.58115	7.58968	7.4686	8.38348	6.40404	7.59043	7.79986	7.58088	7.59885	8.30024	7.59868	7.21955	7.38659	7.05112	7.7342	7.10619	7.80558	7.298	7.6314	7.28971
PSMD4|5710	7.41237	7.34109	7.92816	8.15549	8.04931	8.76754	7.61162	8.54499	8.09494	7.77082	7.74635	8.46203	8.18328	7.84153	7.92827	7.95285	8.95388	8.86984	8.77933	7.5327	7.60937	8.46884	7.51156	8.03781	8.18559	7.82324	7.86072	7.47576	8.01292	7.83169	7.59903	7.27204	8.0578	6.85211	7.03733	7.72109	7.59385	7.98628	7.65117	7.87449	7.63578	8.06844	7.5449	7.70249	7.61914	7.8417	7.62746	7.82528	7.60343
COX7B|1349	8.64861	8.65997	8.27628	8.35394	8.05606	8.9874	9.90929	9.44656	9.18764	10.0472	9.59765	9.76943	8.55479	9.06843	9.61593	8.19629	9.36462	8.37679	10.1583	8.59476	8.56638	8.55404	9.30739	9.42275	9.76548	9.46656	9.33694	9.0569	9.65174	9.15567	9.15854	8.00622	8.86095	9.52437	8.74248	9.58086	8.56061	8.93748	9.71535	8.61288	8.88434	9.22887	9.42138	8.19169	9.29949	8.42617	8.82572	8.79922	8.88553
ATP6V0E1|8992	7.85071	8.44442	7.80743	9.26002	8.158	8.63703	9.22963	8.8932	8.25554	8.48654	9.6738	8.81682	8.33268	8.37642	8.94389	7.71583	8.81545	8.00185	8.79903	8.70622	8.25699	8.36562	8.74933	9.15461	8.70833	8.33944	8.6759	8.39461	9.31307	8.60069	9.15983	8.21349	9.13319	9.55252	9.16325	8.9899	7.80522	8.51694	8.29678	8.60508	9.1644	8.03285	9.05822	9.19161	8.51369	8.22552	8.73969	8.62401	8.94032
ATP5B|506	8.60852	9.76837	8.86598	9.14824	9.24847	9.43121	9.7807	8.76802	9.11161	8.66051	9.63862	8.15705	9.68527	10.7566	9.82243	9.19132	9.06649	9.61245	10.0971	9.33107	9.13661	10.1217	9.71609	9.95326	8.41034	9.31093	9.86606	8.8908	8.61828	8.81087	9.11401	9.41428	9.52713	9.39853	9.20794	9.89524	9.255	9.14732	9.17802	9.06597	9.24866	9.29201	9.70951	8.7279	9.29926	9.528	9.05523	9.07443	8.48408
C14orf166|51637	7.97142	7.94314	8.0587	7.89186	7.92511	8.51781	8.77854	8.46066	8.3946	8.19686	7.7909	8.88066	8.40412	7.95415	8.45105	8.18337	8.41956	7.85131	8.34959	8.07385	8.23921	8.21708	8.48357	8.60281	8.85125	8.50356	8.60583	8.03849	7.44863	8.08543	8.3327	7.60922	9.97707	8.47337	8.42691	7.78001	8.11925	8.08052	8.47531	9.16731	8.29802	8.18946	8.25896	7.57183	7.24298	8.36127	8.08006	8.14121	8.02189
CNBP|7555	7.19735	6.8001	6.70465	7.53717	7.62286	6.99469	8.07033	7.19824	6.87383	6.91225	7.38203	7.31381	7.66684	8.20916	7.23397	7.63659	7.06364	7.15002	6.76395	6.76467	7.39981	7.34755	7.04443	7.95042	7.42543	7.33228	7.05791	7.11295	7.07138	7.49268	7.55063	6.96349	7.57736	7.92408	6.79419	6.75739	7.32586	7.74372	7.50926	7.23252	7.50152	7.12525	7.4436	6.75916	8.11522	7.48632	7.5027	7.1738	7.12056
SSR2|6746	9.08779	9.0748	10.4713	8.44932	9.22742	9.19959	9.51819	10.1785	9.84585	9.42815	9.87375	9.37777	9.56654	8.69708	8.97818	9.09673	9.13693	9.69419	8.99993	9.36146	8.51701	10.3248	9.58211	8.57235	8.86347	9.50506	9.82615	9.50728	9.12554	8.40675	9.10663	8.34382	9.3074	9.41998	8.78149	8.63225	9.0158	9.32733	8.63157	9.7486	9.30984	9.9446	9.19795	9.36996	8.1935	9.23806	9.02495	9.02158	8.34577
MDH2|4191	9.337	7.87584	8.02359	8.62765	7.89449	7.69856	8.61838	7.90103	8.00089	8.05786	7.82504	8.13302	7.91702	8.83041	9.52284	7.10655	7.90252	8.3632	8.80167	8.49443	7.64853	8.16191	8.65194	8.38076	7.12461	8.04307	8.46918	8.2023	8.65467	7.8934	7.54215	7.99477	8.41399	8.08595	8.54739	8.72405	7.82645	8.20068	8.73578	8.05403	7.84643	8.46801	8.28748	8.19199	7.90072	8.02786	8.13283	7.84808	7.9655
C2orf28|51374	6.96332	7.43303	6.88825	7.13895	7.405	6.99367	7.54209	7.61443	7.33729	8.03275	7.18735	7.41431	7.4206	7.09851	8.74088	7.53036	7.20165	7.26857	7.48584	7.26594	7.2731	7.40725	7.34557	7.48749	7.53074	7.61408	8.21845	7.83784	8.29319	6.85954	7.73021	7.88257	8.30262	7.95615	7.96422	7.25398	6.83492	8.08645	7.41645	7.39363	7.7425	7.06867	7.61432	8.19092	8.53074	7.19348	7.23878	7.83227	7.68648
UBE2I|7329	6.68763	7.86326	6.84169	7.30488	7.7659	7.06454	7.6769	7.36622	7.62862	7.61141	7.57841	8.10475	7.48385	7.32744	6.8821	7.02013	7.04526	7.82205	7.30687	7.30717	7.69697	7.36779	6.7694	7.6867	7.62328	8.49127	8.05942	7.20291	8.33952	7.69457	7.83089	7.98754	7.8211	7.50797	6.9065	7.9743	7.5832	7.22267	7.46	7.84482	7.44387	7.30293	7.06695	7.59444	8.49701	6.99183	7.79831	7.2593	8.09973
TRAPPC3|27095	5.77078	6.51332	5.39704	6.49155	5.70907	5.83662	6.75717	6.40688	5.90498	6.25646	6.7259	6.7392	6.08693	6.37898	6.00889	6.99704	5.99431	5.64325	6.17998	6.37671	6.10802	5.71939	6.25405	6.65278	5.82593	6.63957	6.28772	6.21433	6.58216	6.16772	6.40495	6.0468	6.99183	6.38452	5.72189	5.89452	6.49797	7.4079	6.86603	6.14197	6.44501	6.60424	6.6548	6.48284	5.79648	6.32805	6.57947	6.44899	6.00527
RPS17|6218	10.7582	10.6681	11.5095	11.009	12.502	11.5027	13.74	12.222	11.9036	11.0122	11.3363	11.5485	11.5559	11.8728	11.3826	11.0705	12.1472	10.9808	10.7159	11.0784	12.4498	12.0789	11.122	11.5347	10.8627	11.0653	11.487	12.103	10.2574	11.4897	11.2395	10.8547	10.0689	11.4687	10.1311	10.4181	11.5082	11.1787	11.9183	11.9212	11.314	11.3097	11.0481	11.3344	10.6604	11.279	11.318	11.6332	11.0963
TOMM6|100188893	6.86628	7.00265	7.3274	7.59795	7.77068	8.36867	7.78512	7.9011	7.87563	8.19553	7.49595	8.53068	7.72464	7.73683	8.2032	7.52392	7.14263	7.05026	7.81885	7.90051	7.60846	7.54281	8.19205	8.00665	8.20737	7.86191	7.90165	7.48683	7.2652	7.53374	7.79849	7.82206	8.20894	7.9187	7.70953	7.29398	8.1757	7.84308	7.33574	7.76488	7.50694	7.99722	7.46998	7.57549	7.5135	7.49539	8.37764	7.92819	7.72419
LAPTM4A|9741	8.75403	8.99662	8.3727	8.69871	9.51937	9.07653	9.20201	8.92044	9.00754	8.49934	9.21185	8.18509	9.22597	7.91182	8.95178	8.47175	8.35515	8.64573	9.09384	9.17065	8.62232	8.83296	8.80163	8.80916	8.38855	8.52431	9.18289	8.58366	8.92565	8.50496	9.19643	9.02592	9.10618	9.94403	8.30386	8.64148	7.98357	9.33531	8.61164	9.07239	9.06351	8.31964	8.86336	8.79991	9.4289	8.29014	8.58556	9.59709	8.54881
MRPL51|51258	6.80475	8.08715	7.74625	7.74983	7.53563	7.90988	8.50094	8.68386	8.39352	8.52354	8.01913	7.57795	8.33427	8.99176	7.91394	7.67723	8.82288	8.63699	8.36351	8.14774	8.15798	7.95902	8.61492	8.40637	7.96679	8.78266	8.23798	8.26462	7.43262	8.43188	8.07002	8.22919	8.57878	7.44995	7.59208	7.55389	8.19694	7.58999	8.68416	8.53741	8.61619	7.66085	8.02267	9.1928	7.55679	7.47422	8.37219	8.5522	7.56202
SNRPD2|6633	7.71799	8.33867	8.73114	7.92952	8.53955	8.61607	9.13385	9.11933	9.58994	9.75025	8.76529	8.65072	8.33222	8.5808	8.03179	8.47446	9.18015	8.45526	8.00583	7.48734	8.48809	7.71171	9.18991	8.79158	8.56603	8.59716	8.68445	8.05483	7.85353	9.91865	8.45673	8.63217	8.05557	7.60371	8.01607	7.92226	8.58402	7.96126	8.83769	8.48074	8.45879	8.13984	8.12382	8.7749	8.07569	8.23817	9.01993	8.23728	8.88272
SF3B14|51639	7.08397	7.78607	7.22232	7.05196	7.87732	7.40569	8.4606	7.67119	7.22648	7.92638	8.06826	7.33273	7.83782	7.56707	7.70332	7.40294	7.69845	7.6371	7.82555	7.47286	7.49166	8.70617	7.57791	8.09017	7.13365	7.94256	8.62739	7.39668	8.01732	7.53144	8.23094	7.99804	8.34211	7.97813	7.1237	7.62974	7.24454	8.14811	7.20809	8.70725	7.67544	7.21662	7.17842	7.68784	8.51832	7.49726	8.09147	8.13931	7.76961
OSTC|58505	6.86757	7.63724	7.27994	7.33646	7.64088	6.51651	7.69246	6.8724	7.83858	7.1191	7.43694	8.1592	7.6171	7.42051	7.37313	7.10606	7.34167	7.31252	6.9108	7.64566	7.53612	7.87148	8.1281	7.42395	6.85809	7.60025	7.6392	7.48755	6.59398	7.52365	7.34321	6.89396	7.19537	9.06103	7.47387	8.33648	6.93768	8.21995	7.72475	7.72247	7.90349	7.48532	8.04957	7.62355	7.45972	7.4246	7.44618	7.92677	7.27312
BAT1|7919	7.64792	8.20429	7.58252	7.55583	7.88998	8.26871	8.17919	7.62036	7.293	7.26676	7.78735	8.02744	8.74298	8.45516	7.24093	8.06764	8.49509	7.49917	7.03204	8.11764	8.02476	8.0071	7.33701	7.558	8.06194	8.33266	8.32805	7.1118	7.84613	8.05893	7.68828	8.21084	8.47502	7.9867	6.65352	8.12407	7.87157	7.85555	8.11615	8.26512	7.73711	8.12953	7.64734	7.77408	7.0464	7.61775	8.14854	7.90353	7.50197
COX7A2|1347	8.13174	8.70244	8.50447	8.82396	8.80961	9.73593	9.9066	9.32836	8.76395	9.59435	9.53735	9.6612	8.90505	9.35879	8.98762	7.96249	8.29308	8.99346	7.72684	9.15633	8.37996	8.84921	8.47773	9.11635	9.12864	9.69111	8.9984	9.68032	8.70699	9.23489	8.9907	8.60544	9.36584	9.81175	8.46357	8.44673	9.11255	8.2408	8.91111	8.31148	8.50808	8.35674	8.83818	8.41989	8.69744	8.21663	8.83861	9.33661	8.61071
HBXIP|10542	6.56341	6.11288	6.72226	7.26481	7.46882	7.21753	7.79671	7.27099	7.21402	7.30617	7.40465	7.93961	7.05781	7.13768	6.67347	6.71568	6.67809	7.43441	7.20787	7.35515	7.05799	7.35865	7.09124	7.27851	7.36315	7.33421	7.25645	6.0252	6.96853	6.94926	7.65891	7.36302	6.93398	7.73996	6.46048	6.66135	6.80864	7.6366	6.11673	6.96935	7.05565	6.8523	7.22301	7.22957	7.14785	7.4113	7.62276	7.08936	7.02304
RPL29|6159	9.83012	9.55534	10.9351	9.62557	10.6075	9.60841	10.0889	11.0104	10.2721	10.8158	10.3561	10.3383	9.57229	10.1431	10.1056	10.4383	10.9563	9.35828	9.78434	8.88117	11.2088	11.3756	10.2175	10.1622	10.6495	10.2066	9.89919	10.8086	9.19571	10.18	9.71174	9.63029	9.55975	9.83315	9.64006	9.594	9.7444	9.08429	10.7823	10.4729	9.8984	10.0626	10.6358	10.2655	9.89043	10.0821	10.6115	9.93165	10.4021
TMED9|54732	7.88543	8.16798	8.39101	8.19692	7.87418	7.77299	8.70257	7.9229	8.41799	7.34217	9.30022	8.46502	7.68838	7.51273	8.95168	7.62093	7.48274	7.82174	8.24494	8.18374	7.87651	8.17225	7.93782	7.31063	7.66904	7.84012	7.4483	7.94523	8.63706	7.46483	7.92492	8.61666	8.38387	6.90922	8.36838	8.60101	8.57996	8.12493	8.55168	8.19942	8.39918	7.78802	8.46495	8.2141	8.5057	8.09954	8.30252	8.70252	7.93554
CBX3|11335	7.60779	7.52676	7.4683	8.07918	7.87781	7.96811	7.92904	7.46108	7.94711	7.6384	8.42486	7.89929	8.30087	7.72497	7.97425	8.11324	7.88815	7.95557	7.89998	8.11145	7.29449	7.96914	7.71767	7.97023	7.12831	8.50648	8.30985	8.10425	7.33124	7.70596	8.15148	7.61655	7.93294	8.20982	8.10734	8.08762	7.77443	8.43727	7.31868	8.2751	8.20495	7.87498	6.88392	8.72028	8.73573	8.09817	8.11092	8.02063	7.435
H2AFY|9555	7.46177	8.33947	7.675	7.78285	7.80151	8.3552	8.10865	8.19001	7.08284	7.83163	8.36907	8.50822	8.17934	7.76463	8.18256	7.49551	8.44725	7.55742	7.77426	7.82194	8.20605	8.10948	7.8797	8.40502	8.2378	8.44201	8.70957	6.90424	7.71611	8.32084	7.72139	7.79384	8.36673	7.8943	6.51538	7.9317	8.08728	7.83688	7.87704	8.0422	8.28761	7.52238	7.76177	6.90656	7.27192	8.18956	7.41814	8.15595	7.75265
CHMP4B|128866	6.86319	7.70861	7.1773	7.43216	7.07477	7.92703	7.79001	7.00129	7.36284	7.39422	7.30209	6.38388	7.61816	6.71392	7.95643	7.44741	7.43781	8.02355	7.77183	8.02228	7.93597	6.89137	6.84491	7.81784	7.63839	7.6895	7.31293	6.91343	8.08317	7.29366	7.74067	7.64231	7.96417	6.6541	7.34401	7.55636	6.97859	7.26424	6.46215	8.29775	7.59718	7.16215	7.36201	7.97125	7.78632	7.27228	7.4733	7.72638	7.84285
RPL30|6156	10.9787	11.1376	12.1951	12.643	13.0897	10.9181	11.2894	12.2941	12.3693	12.4052	10.9715	11.6903	10.935	12.3531	11.2438	11.5323	13.2024	10.9954	10.5558	10.6665	12.5004	11.4643	12.328	13.1013	11.7797	11.8165	12.0395	11.9964	10.4875	12.7246	11.807	11.4887	10.6814	11.0285	11.9778	11.1988	11.8894	11.0493	11.0629	11.9889	11.2461	12.3382	10.9675	11.8871	11.2555	11.9061	11.7772	11.3497	11.8807
RNF167|26001	6.01019	6.35913	6.25173	7.55891	6.62501	6.86703	6.52098	6.58151	6.57948	6.63549	6.99822	6.15572	6.72818	6.81971	6.98505	6.57282	6.69882	6.51621	6.66145	6.20398	7.02366	6.38889	6.47344	6.80888	6.91507	6.06866	6.52965	6.17648	6.96093	5.99785	6.82547	6.72346	7.054	5.80753	7.17726	6.70072	6.64094	6.74446	6.66622	6.84734	6.30659	6.85411	6.94929	6.49858	6.54462	6.78763	7.51794	6.41138	6.09253
RAB7A|7879	8.34273	7.79148	7.42144	8.45506	7.89738	8.487	8.61329	7.44741	7.96785	7.42497	8.04459	7.66974	8.10579	8.25828	7.92824	8.16673	7.47859	8.28483	8.06125	8.06835	7.69385	7.9858	7.49294	8.16407	7.80595	7.5372	7.26076	7.6141	8.28811	7.78244	8.09753	7.65205	8.0415	8.207	8.12346	7.57096	8.02534	8.93611	7.81321	8.25003	8.12703	7.8053	7.71289	7.46653	8.67075	8.67389	7.63314	8.2317	7.83615
KDELR1|10945	8.20069	7.89764	8.00272	7.88773	6.88758	7.83945	8.40122	7.96777	9.10925	7.6487	8.26021	8.19895	8.08039	7.83253	8.94993	7.93457	8.18431	8.39625	7.7777	8.22622	8.63901	7.58807	8.01459	8.09931	7.90907	7.77852	8.65777	7.51793	7.25937	8.57282	7.62453	7.90578	8.51033	9.06194	8.67593	7.56238	8.38964	7.94798	7.80233	8.34824	8.62408	8.121	7.92159	8.18424	7.54702	8.15327	8.68395	7.55785	7.82628
TOMM7|54543	6.95896	7.3781	7.46957	7.54377	7.73815	9.82555	8.38493	7.36018	7.67826	7.91279	7.77618	7.95085	7.35445	7.63025	8.40636	7.85972	7.92925	7.00192	7.52405	7.60902	7.42888	7.60839	8.19702	7.44698	7.84237	7.80018	7.43687	8.04464	7.93897	7.54079	7.24983	7.52517	7.28289	7.06309	7.2146	7.23369	7.30866	7.25984	7.8288	8.14343	7.89378	7.52679	7.33882	7.94294	7.4535	7.31619	7.79883	7.96979	7.62272
RPS12|6206	10.7973	11.4811	11.9402	11.7626	11.9221	11.7253	11.6936	11.2022	11.6824	12.0777	11.541	11.3805	11.6403	12.5054	11.1633	11.2845	12.5408	11.4686	10.5501	11.3515	12.3344	12.1119	12.2259	11.2768	10.4842	11.7164	12.0891	12.312	9.52569	11.8903	11.5915	10.2159	11.1053	11.42	11.1767	10.8114	11.8495	10.4618	11.5177	11.4546	11.2557	11.8238	11.3285	10.9376	10.18	12.6385	12.3435	11.4785	10.7107
ATP5A1|498	7.74541	8.83863	8.69889	9.06033	8.75861	8.94788	8.78132	7.58481	8.10487	8.30072	9.09654	8.38757	9.11377	9.61865	8.94143	7.90736	9.02576	9.09702	8.28901	8.52997	8.6119	7.91529	8.11319	9.35771	7.74866	9.28363	9.21158	8.32842	7.69259	8.17752	8.63923	8.5294	8.09541	8.33354	9.16936	8.82454	8.40242	9.03579	8.69707	8.42502	8.30166	8.85764	9.48281	7.80621	7.35682	9.01958	8.15986	8.52419	8.25805
EIF3F|8665	6.49225	6.95836	7.84942	6.80273	7.41538	6.35882	7.21055	7.2073	6.92183	7.06352	7.41332	6.60143	7.41989	7.43445	6.8485	7.26238	7.55902	6.29184	6.81882	6.86249	8.06954	7.81383	7.23875	7.80065	7.04632	7.34306	7.69614	6.91978	6.34398	7.40113	6.71587	7.34942	7.03314	7.13767	6.73306	6.78582	7.13305	7.37138	7.74881	7.69475	6.89263	7.36906	7.33187	6.81061	6.57072	7.3603	7.76895	6.98942	7.07536
SUCLG1|8802	5.89209	7.06789	6.06514	6.44526	6.58786	6.94588	6.7116	6.44056	6.46874	6.90102	6.56953	5.95405	6.6664	7.34788	7.48679	6.48687	7.29611	6.69308	7.44854	6.31957	6.68532	6.78924	6.32282	6.89784	6.31763	7.36661	7.44534	6.1758	7.28314	6.3919	6.90117	6.90524	7.19813	6.67947	6.85505	6.90413	6.28964	6.56974	7.12136	6.5719	6.41989	6.43518	7.02226	6.41294	7.16912	6.53422	6.22278	6.83251	6.49254
HINT1|3094	8.04195	9.27562	8.95981	8.65986	8.59174	7.72804	9.85125	9.04799	8.02345	9.62562	9.06664	10.1315	9.3686	9.28275	10.0211	8.12723	8.77695	8.69602	9.07531	8.76933	9.17339	8.93349	9.32143	9.53733	8.30269	9.52793	9.5758	8.81699	9.22631	9.81843	9.11088	8.24738	9.68836	8.98907	8.69611	9.60593	9.22813	8.26965	8.29249	8.94527	9.19454	8.21454	9.34588	9.38276	8.41868	8.75308	8.63012	8.91359	8.97096
RPL18|6141	10.2877	10.8029	11.0778	10.1375	10.6981	10.6996	11.1288	11.3247	12.1153	11.4164	10.444	10.5843	10.4127	10.6417	10.9921	10.8402	11.0705	10.4338	10.1473	10.1931	12.3889	10.2619	11.1162	11.1451	10.9968	11.1927	10.7944	10.3599	9.75427	11.6103	9.72512	10.2624	10.3592	9.81272	9.91811	9.33782	10.8653	9.20257	11.0818	11.2627	10.863	10.2003	10.6581	11.2773	9.76951	10.3651	11.706	10.2807	11.0568
SLC25A3|5250	7.70067	7.92918	8.41028	8.4865	8.53082	8.37291	8.79958	7.18107	8.47436	7.55988	8.48293	7.7162	8.99043	9.2429	9.02788	7.92984	8.15812	8.93622	8.44226	8.62363	8.78973	8.10852	7.93523	9.15125	7.70412	7.97422	8.89608	8.71927	7.94976	7.68923	8.81841	8.53922	8.63167	9.16698	8.30866	8.61539	7.92618	8.11138	8.1388	8.61808	8.70525	8.43221	8.79891	7.90479	8.50457	8.89006	8.51221	8.54837	7.72198
SEC61B|10952	8.05053	8.41791	8.66143	7.87817	7.94923	7.11971	9.75955	9.24619	8.29707	8.62551	8.12663	9.06726	8.45237	8.1971	8.46765	7.81042	8.98097	7.98733	8.21316	7.76366	8.0058	8.64533	8.829	8.30501	8.48702	9.25598	8.80597	8.49331	8.9331	9.0277	8.63564	8.89727	8.30297	7.92785	7.84313	8.46537	8.34279	8.60371	8.28153	8.33942	8.67638	8.32159	8.29848	8.88649	8.05243	8.53004	8.34019	8.56449	8.56196
C11orf59|55004	6.68001	7.21905	7.15281	7.24018	6.83493	6.02801	6.84573	7.38883	7.71379	7.47293	7.62429	7.34651	7.69652	5.9806	6.76509	6.95796	8.07923	7.93876	8.03629	6.90373	7.88871	7.22428	7.29763	7.32177	6.82574	7.21524	8.2918	7.54581	6.90235	7.16821	7.47065	6.88944	6.62011	7.19188	7.75062	6.87222	7.26982	7.61847	7.32084	6.92443	7.66651	7.52404	7.86197	7.616	7.00251	6.80608	7.5182	7.88186	7.66018
NDUFA1|4694	8.40741	8.31075	8.12275	8.18805	7.65945	9.04598	10.1755	9.21888	8.32589	9.85728	9.32963	9.63725	8.45636	8.58297	9.48533	8.33358	8.57129	9.53457	9.27746	8.82931	8.54646	8.18557	8.6768	8.37829	9.57227	8.95152	8.80486	8.99429	9.13273	8.29162	8.85681	7.86675	8.92368	8.05476	9.38103	8.89894	8.14253	8.46202	8.47287	8.48514	8.74663	8.58461	8.70753	8.49757	8.35907	8.24105	8.81393	8.78143	8.29926
EIF3I|8668	7.08578	7.86767	9.14613	7.72182	7.53307	8.25592	8.57067	8.23761	7.33529	8.4221	8.35833	7.92004	7.85384	7.52489	7.2258	7.03045	7.91656	7.25463	7.95537	8.45515	8.7189	7.28443	8.00993	8.68565	7.50113	8.12818	7.80679	7.63765	7.80566	7.56614	8.23768	7.69496	8.02259	8.03324	7.19768	7.18166	8.24689	7.38319	9.10724	7.6561	7.81797	8.35721	8.55932	7.93441	7.34029	7.63964	7.45463	7.57878	7.11807
CCT3|7203	8.19535	7.96959	9.21849	8.94823	9.27196	9.91212	8.8327	8.89315	8.75719	8.37876	8.42852	8.34053	8.29611	9.51802	8.71185	8.73178	8.68259	9.29029	8.69961	8.95535	8.7357	9.39359	8.8476	9.05117	8.35299	8.56437	9.22569	8.28525	8.51284	8.89694	8.47342	8.07757	8.79729	8.16396	7.99622	8.69492	8.75434	8.52646	8.21976	8.9869	8.33455	9.22313	8.71249	7.90248	8.19576	8.62638	7.9865	8.18969	8.34238
MYL12A|10627	9.26986	8.70305	8.98485	10.0959	9.37162	8.93076	10.4114	9.24513	9.30002	8.72734	9.39525	10.3754	9.32991	8.8744	8.91051	9.13732	9.15429	9.65409	10.0356	9.64203	9.11091	8.62152	9.02597	9.31646	9.85476	9.28982	8.89764	9.04171	9.91057	9.66488	9.31698	9.26638	10.189	9.20492	9.37435	9.1701	8.94481	10.383	9.61906	9.16479	9.33643	9.71057	9.42474	8.93092	9.20998	9.1195	8.65096	9.88621	8.66808
TBCA|6902	7.04598	7.39096	7.53091	7.2324	7.61677	8.47075	8.38931	8.45635	7.13207	7.99202	7.71304	8.9588	7.85673	7.95136	7.7631	7.4284	8.06658	7.5132	8.21005	7.05409	8.07814	7.74022	8.01718	8.16553	7.47753	8.13126	8.19314	7.34907	8.13794	8.48176	7.76716	7.66468	7.17287	7.10411	6.74366	6.67666	7.43957	7.62871	7.49081	8.12743	8.10755	7.15365	7.51892	7.79711	7.60311	7.96727	7.01176	7.8684	7.24719
JTB|10899	7.37647	6.80583	7.83759	7.39128	7.66331	8.03745	7.38006	8.03415	7.8182	7.66051	7.14678	8.03713	7.55799	7.53799	8.49292	7.44266	7.17719	8.06772	7.49274	7.89864	6.96489	7.99456	7.66154	7.41909	7.35233	7.38751	7.55546	7.32852	8.15297	7.52059	7.14991	8.25466	7.3122	7.54668	7.72675	6.97296	7.80442	7.4209	7.29838	7.51573	7.11469	7.44924	7.3381	7.00575	6.43641	7.18398	7.60757	7.19554	6.97022
MDH1|4190	7.51999	7.94636	7.37239	7.58735	7.47004	7.80911	8.21003	7.61112	7.23946	7.62273	8.01843	7.88187	7.62705	7.71892	8.14965	7.41192	8.36923	7.75792	8.53374	7.76377	7.47866	7.66935	7.34055	7.70175	7.15341	8.44219	8.39739	7.58232	8.56641	7.68218	8.22792	7.58836	8.67988	8.20173	7.31734	8.04968	6.91075	7.68577	8.16344	7.59139	7.43483	7.43918	8.16934	7.84817	8.88809	7.75272	7.57134	7.55856	7.42204
PSMA4|5685	6.8707	7.28669	7.25848	8.02426	7.80138	8.47521	8.83156	8.21642	7.37058	7.5047	8.01089	8.36987	8.05221	7.86071	7.12797	7.01134	7.93512	7.96987	8.17752	7.73417	7.84977	7.48404	7.00573	8.94347	7.66609	8.17093	7.96445	7.97562	7.25572	7.98371	8.1462	6.92711	7.78165	8.40613	6.91649	7.65586	7.50726	8.39509	7.75261	7.66775	8.0975	7.59815	7.82225	7.11908	7.90562	7.51829	6.94376	7.69143	7.65623
SARNP|84324	5.86585	6.75398	6.28183	6.47854	6.7969	5.99555	6.89051	6.73919	6.5375	6.47053	6.8079	6.90757	7.10859	7.28186	6.30654	6.82896	6.50726	6.5804	6.37385	6.32191	6.78871	7.27793	6.63079	6.89882	6.5819	7.4268	6.71379	6.78114	6.10864	6.87519	6.62642	6.97346	7.15972	6.55861	5.73227	6.30364	6.80466	7.55431	6.0126	6.77911	6.92223	6.30538	6.52183	6.79397	6.6314	6.68205	6.51285	7.06737	6.05759
EIF4G1|1981	7.78266	7.8532	7.91038	7.88029	7.45145	7.99914	8.42147	8.20992	7.88029	7.34963	7.99743	7.42751	8.37694	7.92095	7.50987	8.05591	9.42269	8.69073	7.39307	8.61463	8.14459	8.02793	7.47252	8.38279	7.17452	7.40171	6.64176	7.67044	8.34388	7.86189	7.5021	8.3885	8.40497	7.22486	7.04758	7.63396	8.37278	8.43312	8.06834	8.00223	7.79309	7.85723	8.48927	8.18909	8.78408	7.6772	7.92466	8.06918	8.53031
HADHA|3030	6.74854	7.54744	7.07486	7.18514	7.12358	6.90695	7.10958	6.33764	6.79079	6.9266	7.49143	6.03314	7.50133	7.33156	7.91802	7.19775	7.03758	6.79999	7.30154	6.89368	6.65849	7.15586	7.23847	6.92614	6.24843	7.16668	7.36895	6.33427	7.21371	6.33235	6.80406	6.99422	7.62799	6.4909	6.40006	7.07025	6.46741	7.22992	6.81144	6.88959	7.13109	7.34359	6.30521	7.0617	7.915	7.28798	6.87936	7.2522	6.92975
HNRNPF|3185	7.86967	7.66927	7.86624	8.05475	7.32408	8.08204	6.98952	7.14205	7.67484	7.35432	7.51778	7.8797	8.12773	8.1098	7.37377	8.21161	7.66197	7.81931	7.27	8.16999	7.67769	8.29028	7.68382	8.01793	7.47328	8.25042	8.02898	7.36834	7.1802	7.98046	7.95736	6.70463	7.89232	7.52013	7.74282	7.87161	7.78102	7.90936	7.39746	8.09806	7.44174	7.72631	7.79857	7.63822	8.51878	7.61971	7.95636	7.54753	7.78171
SEC13|6396	7.21619	6.7509	7.02928	7.33138	6.59532	6.56675	7.89773	7.20745	7.78085	6.93448	7.20173	8.20021	7.37354	7.59404	8.16796	8.13686	7.51556	7.40484	7.35101	8.37447	7.27191	7.62771	7.03598	8.53301	7.33407	7.55287	6.79525	7.4797	7.31026	7.0823	7.35328	7.25466	7.43786	6.85926	7.48918	7.57598	7.24328	7.3072	7.28167	6.59841	7.25569	8.11778	7.88514	8.10907	7.48404	7.25636	6.79521	7.58665	7.33024
CDC42|998	7.63138	8.37593	8.33707	8.33432	7.89067	7.69308	8.68515	7.78324	7.49498	8.09401	8.81922	8.42815	8.28331	7.55503	7.29949	7.62267	8.0745	7.41894	7.65661	8.11094	8.20027	7.55719	7.75745	8.56796	7.45011	8.39524	8.24607	7.90498	8.36005	8.13649	7.98915	7.82745	8.28464	8.38902	7.72588	8.00296	7.5443	8.11066	8.72565	8.17044	8.56579	8.18769	8.25812	8.01709	7.99662	8.44881	7.47557	7.98992	7.44252
KHDRBS1|10657	6.57298	7.18071	7.57486	7.15255	7.03841	6.75517	7.23259	6.77473	6.6447	6.74318	7.1567	7.17519	7.59909	6.68252	6.28686	6.94306	7.20017	7.09301	6.75721	7.29862	7.35621	6.9606	6.9869	7.31634	6.63066	7.76078	7.62816	6.66734	7.07261	7.29011	7.05678	6.56948	7.51239	7.54676	6.22317	7.15855	7.22339	7.39543	7.40051	7.40078	7.02124	7.11148	6.79516	6.96571	7.72106	7.45567	6.81914	6.85412	6.89805
SPG21|51324	6.31659	6.76431	6.53384	7.21382	7.09566	6.85916	6.62503	6.72687	6.31701	6.26163	7.1086	6.90028	7.05043	6.49806	6.9061	6.55865	7.16575	6.86309	7.42461	7.00805	7.00909	6.91919	6.98994	6.69555	6.32438	6.64297	6.98043	7.09924	7.64005	6.64527	7.74913	6.39579	6.78193	7.95011	7.04705	6.45832	6.66329	7.57802	6.65956	7.05903	6.33229	7.35836	7.40629	7.46748	6.56681	7.03464	6.22785	6.71428	6.68933
SFRS9|8683	6.61015	6.75634	7.46186	6.85258	7.43422	8.01823	7.80833	7.09751	7.49249	7.12988	7.13618	7.53965	7.72329	8.43338	7.16486	7.31684	7.65919	7.83896	7.56605	7.67577	7.45882	7.22869	6.8707	7.43525	7.39946	7.86131	7.80528	7.55594	7.48355	7.79562	6.88999	7.98482	7.92812	7.73651	6.91909	7.39211	7.04765	8.01285	7.45694	7.95491	7.96348	7.0275	8.16744	7.56703	7.98019	7.70896	7.79413	7.93304	7.27726
ERGIC3|51614	7.78436	8.57226	8.21044	7.80922	7.9938	10.273	8.37583	8.0433	7.36119	8.42933	8.5694	7.1959	8.30533	8.30653	9.08477	7.99045	7.99363	8.34003	7.46838	8.55738	9.23311	8.168	8.35875	7.91412	8.6859	8.02451	8.40726	8.28781	7.87347	7.99355	8.49551	8.04956	8.55137	7.51423	9.2052	8.56166	7.37092	7.41661	8.23499	8.6798	8.61385	8.59588	8.38118	8.62383	8.24952	8.38278	8.32257	7.85617	8.20902
EIF1|10209	8.26965	8.88583	8.98515	9.48715	10.3851	9.56553	9.21115	10.6648	9.43192	8.48893	9.47097	8.9989	9.84365	8.95884	9.62865	8.79351	9.15885	9.55921	9.48558	8.84574	9.01323	10.0794	9.02694	9.4488	9.05215	9.39115	9.14598	9.06129	9.18866	8.76819	8.8683	8.67224	8.96948	9.0159	9.39382	9.59521	8.59179	8.97152	8.69924	9.06823	9.12068	8.8137	8.64207	8.51514	9.44751	9.56481	9.35348	9.31518	8.6264
USMG5|84833	7.0302	8.32886	8.25225	7.89982	7.95931	8.51048	8.65014	9.26506	8.34602	9.29627	8.91759	8.16565	8.34579	9.17749	8.95692	8.1621	8.89234	8.02581	8.16456	8.26987	8.67193	8.33964	8.78933	8.8388	9.17019	9.20307	8.36097	8.61173	8.1761	8.82064	8.80478	8.40456	7.75554	9.22352	7.78493	8.23722	8.32676	9.04434	8.2369	8.27907	8.61682	8.28948	8.53866	8.92514	7.60789	8.0336	8.69549	9.02031	8.4773
TALDO1|6888	7.70017	7.69638	7.68301	8.73338	7.68482	7.87946	7.84914	8.35698	7.99451	7.91725	8.42544	9.04784	8.28421	7.98095	7.84772	7.39721	8.11769	7.3683	7.6512	7.95984	8.07525	7.9601	7.62909	9.25764	7.69763	8.14047	8.39206	7.63647	8.26298	8.88469	8.14098	8.47434	8.19001	7.69922	8.51197	8.91787	8.40024	8.9771	8.12848	8.13826	7.7478	7.81581	8.78821	7.91206	7.21991	8.15675	8.20258	7.97785	8.10708
SFRS7|6432	5.59513	6.34282	6.00183	5.91414	6.44546	6.45495	6.22924	5.47922	5.71071	5.92895	6.34662	6.29852	6.48429	6.7705	5.91145	6.40234	6.27666	6.08475	5.82733	6.03923	5.94576	5.86415	6.00121	6.15346	5.78399	6.63502	6.69386	5.83302	6.56823	6.34572	6.36953	5.99952	6.71158	6.11318	5.39845	6.35093	6.19923	6.31045	6.30263	6.62031	5.71912	6.0765	5.97863	6.02409	6.52521	6.62046	6.24486	6.36066	6.21789
PSMB2|5690	7.50207	7.70476	7.99426	8.14195	7.10158	7.2952	8.42491	8.16805	7.37507	7.54251	7.95697	9.00405	7.46941	7.68817	7.33329	8.25761	7.19548	7.64375	7.98498	7.94115	7.89487	6.94372	7.75573	8.5332	7.01774	8.22927	8.05398	7.75988	8.48373	8.20054	8.00132	7.66627	8.8001	8.88405	6.92528	7.78458	8.17824	8.75372	8.28843	7.50775	7.51764	7.70491	7.7911	8.44083	7.82776	7.85265	8.01073	7.62718	7.75726
MRPL33|9553	6.22219	7.26376	6.70781	6.81152	7.11135	7.10061	7.35473	6.05057	6.74076	6.95929	7.24254	6.44857	7.3227	7.53386	8.0552	7.03776	6.88503	7.05564	7.51826	6.76309	6.77612	6.9764	7.74607	7.15885	6.30427	7.33593	7.85216	6.9695	7.37474	7.27424	7.38913	6.55093	7.84102	7.09938	6.69278	6.8301	6.72764	7.09894	6.48773	6.84448	7.16226	6.76522	6.63228	6.72004	7.86388	7.3019	7.06889	7.11912	7.38446
ACP1|52	6.07095	6.94412	6.22567	6.26867	6.63592	6.36625	7.16939	6.42953	6.59132	6.76084	6.7314	6.51534	6.80734	6.89488	7.79516	6.68087	7.04707	6.27326	6.95006	6.67708	6.6598	6.97788	6.69478	6.9205	6.61717	7.06033	7.69646	6.58815	8.01361	6.98875	7.16929	6.86858	6.75363	6.94528	6.88245	6.97597	6.26207	7.35575	7.6477	6.59788	6.5711	6.30826	6.76112	6.35956	7.30422	7.03313	6.68324	7.02099	6.72881
SPCS1|28972	7.26765	6.95441	7.44974	7.40501	7.7722	7.32361	7.0774	7.55491	7.20263	7.36378	7.70415	7.52298	6.97162	6.96785	8.10291	7.55384	7.93891	7.11936	7.04139	6.87514	7.74732	7.92033	6.92211	7.02982	7.79347	6.98078	7.18856	7.74607	8.12392	7.44614	7.64713	7.21876	6.87429	8.20807	8.15863	6.87979	7.61437	7.23394	7.25274	7.50264	7.03777	7.36356	7.49596	6.67544	8.06455	7.8986	7.35371	7.00582	7.74402
C19orf42|79086	6.38925	6.15459	6.00967	5.99431	6.20507	6.38156	6.6452	6.5773	6.07999	6.63645	6.65678	6.24485	6.98995	6.53701	6.40218	6.15068	6.84949	6.32286	6.25966	7.46251	6.19141	6.89022	5.9204	6.6824	6.11787	6.37984	5.98684	6.69167	6.64342	6.05454	6.7791	5.69552	5.85959	6.27475	7.21776	6.7697	6.37006	6.19931	6.34893	6.48688	6.14243	6.05069	6.95343	7.2666	7.46301	7.45098	6.29595	6.66676	6.14858
PCBP2|5094	7.40368	8.72495	7.83499	7.87646	8.2917	8.35251	8.33897	8.03708	7.24815	7.34948	7.98974	7.52273	8.38225	8.86681	8.06278	8.37982	8.76161	8.49459	8.0863	7.93397	8.47952	8.95732	8.28756	8.50482	7.74256	8.32981	8.91885	8.12125	7.64729	8.32326	7.92063	7.96062	7.92679	8.19328	7.78728	8.17167	8.28458	7.5271	7.75575	8.34123	8.86892	7.78053	8.06687	7.70155	8.35494	8.5291	8.09456	8.00604	7.29139
COPZ1|22818	7.25775	7.86861	7.3861	7.5554	7.85749	7.76812	8.0178	7.38535	7.5923	7.32433	7.84852	7.28552	8.51948	8.18159	7.75149	7.75895	7.87882	7.19913	6.80489	7.27009	7.57175	8.91993	7.72319	7.79182	7.78066	7.90121	8.10676	7.34286	7.44932	7.38201	7.11746	8.10805	7.15837	7.97051	7.52145	7.59826	7.73719	7.42713	7.4834	7.95049	7.78906	7.4775	7.60984	7.57284	7.24481	7.52559	6.9173	7.6604	6.64874
HNRNPA1|3178	7.31644	8.38063	8.06852	7.83933	8.36299	7.92289	8.52011	8.13585	7.62247	7.79287	7.97849	8.67881	8.88384	8.98419	7.74576	7.8979	8.12274	7.70834	7.43143	7.76271	9.03657	8.67875	8.20024	8.496	8.2921	9.21003	8.95941	7.99273	7.28441	8.43702	8.1172	7.71595	7.88152	7.91221	6.93626	7.47785	8.40674	7.77355	8.11528	9.00074	8.04582	8.02067	7.65141	7.86121	7.88327	8.31784	8.55246	8.18151	7.86557
C1orf77|26097	6.59023	6.43004	6.60153	6.33795	6.52843	7.25479	6.24887	6.47997	6.15714	6.39663	7.03469	6.91153	7.18934	6.81629	5.93416	6.60811	6.44489	6.7795	6.08294	6.8204	6.69527	6.93331	6.62174	6.24362	6.21683	6.6008	6.83559	6.10169	7.14172	6.5154	5.82745	6.24627	6.62783	6.62695	5.47845	6.27403	6.52895	6.85516	6.66989	6.99823	6.18307	6.1891	6.53195	6.38405	6.15951	6.4931	6.53181	6.84061	7.15613
PRR13|54458	6.99799	8.05466	7.23005	6.92783	7.80334	8.07664	7.39535	8.2009	6.97113	7.1566	7.57889	7.18584	7.76663	7.85119	7.23286	7.95938	8.14486	8.00721	7.53671	7.8355	7.4503	7.50797	8.1354	7.8184	8.37684	7.52586	7.6492	7.86181	7.95109	7.34125	7.72344	7.762	7.41202	8.6535	7.37634	7.30738	7.23751	7.18518	6.90024	8.06972	7.7899	7.39398	7.59356	7.6218	7.64911	7.62524	7.56043	7.59946	6.76294
PSMB7|5695	6.86668	7.69713	7.29347	8.27411	7.39373	8.54673	8.8118	8.06149	8.3023	7.49222	7.80865	8.20895	7.91927	8.13928	7.59165	7.4331	7.9955	8.1613	7.30214	7.44562	7.69502	7.45528	7.71168	8.93315	7.82171	8.28641	7.98333	7.18105	8.39213	8.75016	8.30001	8.431	7.5243	7.58442	6.7291	7.63399	7.56918	8.04393	9.00646	7.58788	7.87656	7.58815	8.064	8.47152	7.90107	7.70825	7.32469	7.93392	8.20373
MRPS18A|55168	5.58006	5.66332	5.47515	5.96582	5.25114	6.146	5.95341	5.93497	6.02986	6.09443	6.00028	5.90119	6.14462	6.25001	6.76939	5.83851	5.46805	6.06668	6.47872	5.52642	5.72966	6.11193	6.19118	6.14867	5.97889	6.11109	6.17914	6.09048	5.75692	6.26856	5.77995	6.2689	6.72949	5.46336	5.59764	5.99202	6.00342	6.20484	6.08513	5.67411	6.1183	6.3431	6.27369	6.08573	5.63075	5.72524	6.16208	6.21058	6.62483
RAB1B|81876	7.52012	7.97821	8.14151	7.57048	7.51142	9.73939	7.80134	7.89	8.05191	7.98862	8.14496	7.95017	7.81925	8.82689	7.69029	7.95651	8.25542	7.96935	8.1041	7.27217	8.6277	7.87017	9.61391	8.2515	8.84861	7.87188	7.87474	7.38731	7.57633	7.83228	8.14725	7.7827	7.66013	7.82375	7.64162	7.44253	8.14146	8.36971	8.66938	8.15567	8.43555	8.3173	8.49119	8.2808	7.48186	7.74908	7.94445	7.57183	8.43989
GNAS|2778	11.1694	13.3862	10.14	10.2291	11.797	12.1335	10.5633	11.4132	9.9894	11.8934	11.8083	11.7956	10.728	10.7178	11.2247	10.2898	10.6428	11.2631	10.0442	10.8145	12.043	10.3417	10.6442	10.7805	12.3787	10.8124	11.0097	10.3193	11.1908	10.3579	10.7397	10.2799	11.9113	11.136	11.1257	10.6842	10.8777	11.007	12.0982	11.1005	11.0318	10.5854	10.8543	10.7665	11.3341	10.5422	10.6105	11.6619	10.5859
EEF1G|1937	9.09031	10.1074	10.4917	9.32375	10.4018	9.45247	9.77815	9.6318	10.8328	9.79204	9.88124	9.14235	9.02192	9.76314	9.53988	10.39	9.70151	9.60409	9.87798	9.45059	10.7676	10.7522	11.3392	10.7622	9.18341	10.1901	9.30053	9.72385	8.13463	9.91389	9.62089	9.10509	9.07304	9.51649	9.49505	8.7028	10.3911	9.25637	10.8544	10.7466	9.41329	9.84251	9.7151	9.56261	10.0073	9.97617	10.6811	9.42448	10.3647
PSMB6|5694	6.67436	7.01437	6.93777	7.78958	6.87736	7.75012	7.37639	7.18872	7.36544	7.64159	7.57857	7.50618	7.59502	7.98045	8.08092	6.74413	7.08538	7.2009	7.68428	7.17137	8.20598	6.6419	7.04589	7.42702	7.88534	7.63068	7.01969	7.24978	7.37744	8.3238	7.05224	7.42856	7.92182	6.0871	7.42299	7.34268	6.92445	7.63096	8.38461	7.17442	7.31175	7.27797	7.91321	7.85822	7.65325	7.30312	7.40121	7.83281	7.45597
EIF3B|8662	6.87976	6.64693	7.29532	7.53513	7.50808	6.09726	7.66185	6.79093	6.76434	6.90079	8.08713	6.78757	7.18642	7.76642	7.82495	7.11744	7.15733	7.89182	7.80065	7.64394	7.41597	7.50238	7.59099	6.7602	6.5731	7.19757	7.25511	7.54428	6.50507	6.73672	7.04719	7.07592	7.33085	6.84918	7.36613	7.59792	7.41097	7.03196	7.69809	7.98928	6.85884	7.48183	7.11133	7.38021	8.06061	7.26493	6.82859	7.06872	7.62701
AP2S1|1175	7.32887	7.38653	7.31435	7.23814	7.07064	7.77286	7.6991	7.88504	7.96556	8.02838	8.0701	7.67958	7.28425	7.38925	8.13503	7.40684	8.04101	7.2408	7.39626	6.71998	7.68323	6.82513	8.35245	8.18892	7.96211	7.78279	7.87529	7.19122	7.71116	8.20878	7.38436	7.57107	7.72788	6.88312	7.24576	7.3289	8.13541	6.98961	7.82663	7.66735	7.47953	7.09295	7.6982	8.29693	7.06353	7.2592	7.87121	7.62666	7.61029
SSBP1|6742	6.44799	7.41909	7.45248	7.6503	7.63235	7.01325	8.45777	8.27464	8.15092	8.38035	7.44279	8.06478	7.97923	7.73846	8.44376	6.62581	7.58652	7.69327	8.19706	7.87349	7.38774	7.822	6.98362	8.20054	8.0041	7.6001	7.9806	7.48861	8.05864	7.84466	8.07824	7.5699	7.79525	7.61108	7.81384	7.01103	8.11788	8.27974	7.77013	8.12671	7.90411	7.99745	6.80219	7.67262	7.78584	7.93655	7.78672	8.19785	7.24988
PREB|10113	5.57609	6.38713	5.81955	5.34266	5.69049	6.11046	6.34301	5.5045	5.39283	5.59492	6.07283	5.83594	5.78031	5.85374	6.79817	5.70111	5.88333	6.13241	6.80273	6.13649	5.94394	5.99815	5.69761	5.68611	5.40342	6.27144	6.51802	6.22762	6.71123	5.97337	6.51155	6.43491	6.4977	5.97962	5.73497	6.30851	5.54162	6.1498	5.72772	6.02126	5.90827	5.94969	6.35153	6.12261	6.73548	5.89204	6.04792	6.24882	6.30397
TPM3|7170	8.61547	9.15931	9.71689	9.12844	9.28059	9.44176	9.74593	10.2411	9.41715	9.3688	9.63539	9.41434	9.51861	9.19007	9.00329	9.16992	8.71701	9.8714	9.28045	9.74679	9.26284	9.44987	9.24997	8.87871	9.24571	9.54544	9.1503	8.98986	9.74293	9.0746	9.22434	9.8838	9.7356	9.58308	7.59346	9.07327	10.2754	9.58059	9.71933	10.0474	9.42407	9.071	8.31216	9.1441	9.21227	9.19973	9.43828	9.39087	8.39764
RPS9|6203	9.82456	10.2412	10.7732	9.78254	10.123	10.4642	10.5081	10.6452	10.4889	10.474	10.2432	10.6391	10.0278	10.197	10.3136	10.6212	10.3351	9.65361	9.63819	9.7266	11.6526	9.99835	10.4809	9.99519	10.325	10.4698	9.74799	10.7225	9.54226	10.5816	9.62251	10.3057	9.30178	8.45011	8.92935	9.5787	10.3672	9.58689	10.3372	10.3018	10.3814	9.63054	10.6358	10.9531	9.58066	10.0764	10.8037	10.4634	10.8326
VKORC1|79001	6.26645	7.20764	6.60814	6.39076	7.11042	7.23206	7.21353	7.25312	7.3944	7.15995	7.34355	7.5294	6.94917	6.54788	7.36565	7.31014	6.82113	7.85663	6.92498	8.09231	7.53142	7.22231	7.57404	7.06503	7.09883	7.67039	7.57336	7.62073	8.22622	6.74304	6.9761	7.28864	7.09026	7.69961	6.93951	6.86945	7.43685	7.33421	7.19067	7.54714	7.28554	6.97091	6.52764	7.49515	7.42558	6.29032	7.72328	7.84509	6.89024
ATP5J2|9551	8.09394	7.75643	8.52687	8.27	8.72177	8.03824	8.91409	8.87343	9.30266	8.98838	8.21797	9.45652	8.69127	8.65986	9.58327	7.52291	8.71284	8.08898	9.18297	9.02288	8.75443	8.06599	8.77635	9.2198	9.21115	9.32756	8.9438	9.04636	9.65879	8.67321	8.63176	9.27542	9.26204	8.72706	8.95931	9.53009	8.34312	8.70149	9.41259	8.59267	8.46933	9.19453	7.60169	9.4782	8.17302	9.07716	8.72264	8.92385	8.17873
RPL32|6161	8.89397	8.64145	9.81009	9.12523	10.0794	8.71813	9.94909	10.1441	10.0354	9.69341	9.54928	9.64443	9.15115	10.4747	9.17489	10.0175	10.1259	8.91298	8.51557	9.15124	10.2296	10.2763	9.13076	10.4294	9.65403	10.3066	8.93305	9.81036	8.49811	9.64591	9.55781	8.5832	8.59734	9.45126	9.17218	8.09339	9.0658	8.30928	9.37901	9.69817	8.54232	10.2719	9.1531	10.4277	9.48004	9.2198	9.37796	9.21726	9.51727
SFPQ|6421	7.13268	7.92082	7.67158	7.69723	7.67212	7.8243	7.87502	7.70715	7.23174	7.53421	7.655	7.77389	8.42946	7.57909	6.64182	8.70184	7.8168	7.92956	7.80779	7.78585	7.92779	7.62407	7.61818	7.82271	7.20181	8.70814	7.9069	7.38484	7.67094	7.83638	8.01264	7.57811	8.29175	7.49237	6.75632	7.9588	8.16384	8.18267	8.30539	7.63357	7.53344	7.56302	7.86533	7.74194	7.77692	8.4803	7.70001	7.68281	7.57962
SNRPG|6637	6.65429	7.58639	7.23441	6.88498	7.42734	7.98108	8.35506	7.7625	7.26703	7.83721	7.57112	7.99068	7.41753	6.99363	7.35259	7.31703	8.33251	7.61509	7.5717	7.26967	6.96889	7.2666	7.96357	7.07168	7.64551	8.19266	8.22927	7.77411	8.51452	8.38204	8.36805	7.70807	8.43079	7.01593	6.93966	7.66493	7.54935	7.84168	8.37988	7.63769	7.09263	6.93884	6.97757	7.99325	8.28716	7.4871	7.52916	8.09859	7.62751
PDCD6|10016	6.74981	6.99832	6.9092	7.81095	7.46637	7.182	7.69022	7.40215	7.20268	7.3811	7.93776	7.78759	7.43955	7.30256	7.27217	7.33686	8.17474	7.61662	7.54614	8.33454	7.27004	7.36738	7.79659	7.34291	7.29704	7.09226	7.38852	7.37384	8.39969	7.13653	8.2915	7.82534	7.00698	7.20314	7.35819	7.86376	6.8136	7.37159	8.08791	7.1299	7.383	8.27	7.81321	7.2686	7.85833	7.77167	7.50954	8.11396	7.55587
EIF3D|8664	7.50207	7.15185	8.01398	8.21298	8.56087	8.11405	8.29313	8.03981	8.15614	7.20176	7.47219	7.80244	8.12551	8.0329	8.21668	8.10735	8.46763	8.05732	7.94293	7.81021	8.36568	8.8894	8.07879	8.378	7.34124	8.31199	7.61651	7.69691	7.72714	7.81748	7.90333	7.03879	7.47294	7.46509	7.28412	7.32337	8.16461	7.05926	7.81002	7.84822	9.13504	8.50041	7.78275	6.98109	8.06387	7.35745	7.71494	7.93742	7.17994
RBMX|27316	6.604	7.14411	6.98521	7.10498	7.29438	7.27253	7.62707	6.84377	6.74763	6.85733	7.15432	7.41947	7.99501	7.83873	6.87424	7.24425	7.45217	7.498	7.01122	7.46579	7.49843	7.25902	7.29173	7.37114	7.15857	7.78571	7.99421	6.83405	7.28376	7.5004	7.30664	6.30561	7.6466	7.15945	6.81798	7.18097	7.21034	7.27353	7.31749	7.83796	6.97878	7.27609	6.91339	6.94154	7.24162	7.76973	7.1855	7.08999	7.08114
EIF3CL|728689	7.26413	8.76629	7.989	7.99594	8.98091	8.87576	8.25583	8.03234	8.12454	8.41848	8.29	7.81619	8.16282	8.63201	8.4045	8.17313	8.16415	8.33404	8.27156	7.15133	8.37404	8.11557	8.82141	8.16399	7.84924	7.96088	7.66683	7.47412	8.2113	7.60165	7.9552	9.30712	7.9906	7.68997	8.90667	7.66776	9.22501	8.11516	8.49884	8.06707	8.6365	8.73872	8.08938	6.9205	8.619	7.88179	7.81766	8.1167	8.38161
MTCH1|23787	6.90722	7.13027	6.82156	7.19215	6.62766	8.27303	7.60601	6.68849	7.0451	7.3461	7.50652	7.23749	7.98199	7.46328	8.01807	7.07552	6.93774	6.60466	7.28707	7.51473	7.31997	7.04228	6.92146	7.23686	6.87295	7.21203	7.2467	6.54138	7.43668	7.26975	7.03309	7.67392	8.30431	7.06573	6.80025	7.78905	7.93099	7.36324	7.54588	7.41425	7.36592	7.40269	7.65993	7.2456	6.94731	7.45567	7.58344	7.40294	7.71107
PFDN1|5201	6.02422	6.3911	6.11785	5.817	6.17823	6.58879	6.62762	6.52537	5.87046	6.29885	7.0425	6.3129	6.76893	6.18294	6.93953	6.22685	6.61155	5.75726	6.85996	6.14861	6.41588	6.50726	6.47505	6.32554	6.80108	5.68876	7.22892	6.15855	6.49376	6.41828	6.55778	6.18588	7.05947	6.55122	5.74881	6.46321	6.27953	6.46329	6.42158	6.6445	6.96522	5.59864	6.52304	6.7453	5.91163	6.53811	6.66661	6.96415	6.31736
PPP4C|5531	6.63894	7.24197	7.21714	6.96695	6.95917	7.06795	7.52306	7.31323	7.38019	7.23644	7.69113	8.03809	6.86166	7.2303	6.8791	7.28025	7.46145	7.37456	7.87736	7.36044	7.34883	7.00044	8.00558	7.17349	7.62937	7.65472	7.71389	7.6636	8.39989	7.15801	7.62791	8.83796	7.38115	6.63577	6.613	7.16802	7.81481	7.59954	8.14337	7.75072	7.34765	7.02691	7.29948	7.72276	7.86943	6.66028	7.60577	8.37877	7.25384
PDIA6|10130	8.64451	8.45391	8.30955	7.66941	8.05926	7.92858	8.27997	7.84594	7.68732	8.00367	8.12154	7.42722	8.00949	7.64243	8.97722	7.61276	7.34979	8.35081	8.56876	7.63483	7.8424	8.08066	8.37557	7.25239	6.94028	8.09039	8.21561	8.22568	8.62156	7.8344	8.46684	7.49387	9.75028	8.185	8.61961	8.25756	8.17653	8.68134	8.89454	8.29051	7.85174	8.21154	8.60497	7.50144	9.12348	8.46221	8.10051	8.03708	8.04889
RPS24|6229	10.8175	11.3005	11.6058	12.8503	12.3034	11.1889	11.4053	12.0524	12.5495	12.018	11.323	11.5205	11.4	11.1722	11.3454	11.7204	12.2493	10.7006	10.5832	10.5356	12.4248	11.8718	11.9163	11.7408	11.8954	12.1195	12.1528	11.2218	9.73952	11.3238	11.4029	13.0141	11.0802	11.3323	10.9031	10.712	10.9316	10.9742	11.5231	12.2275	11.1542	11.46	11.2448	11.7859	12.7502	11.03	13.7287	11.7574	10.9715
NOP10|55505	7.14312	7.03515	7.64937	8.06978	7.99006	7.89625	8.39305	8.07052	8.33958	8.44676	8.53182	8.86911	7.56471	7.94245	7.86001	9.18102	7.7583	7.84438	8.66203	7.78634	7.19108	8.14087	8.14353	7.98007	7.57342	7.80017	8.27223	9.04939	7.72553	8.16672	8.28016	8.46834	8.05674	8.62916	7.70098	7.8092	8.33804	8.45222	8.90075	7.62013	7.55126	7.67866	8.1562	8.79736	7.47843	7.60478	7.55631	8.10122	7.8227
COX6A1|1337	7.95815	7.77467	8.81153	8.69299	8.51595	9.16021	9.56472	9.54604	9.53581	9.68696	8.84907	9.03931	8.35111	9.91703	9.39157	8.12149	8.91624	8.84838	9.80192	8.58417	8.76544	8.2218	8.79573	9.20337	10.0048	9.49719	9.91941	9.22067	8.74453	9.32336	8.05455	8.96832	9.05876	9.05524	9.14024	8.76406	7.68249	8.88559	9.17762	9.07344	9.04402	8.48135	9.56139	9.30387	8.16927	8.96076	9.05427	9.06715	8.52045
RPS10|6204	9.50778	9.60465	10.6158	9.38242	10.1381	10.1692	10.7339	10.7158	10.4663	10.5146	10.0853	9.9292	10.3127	10.4823	10.0044	10.3559	10.4996	9.16375	9.08353	9.27572	10.5168	10.5882	10.905	10.2176	9.68466	10.1948	10.2668	9.93663	8.48716	10.0818	9.67852	9.78634	9.7024	9.63472	9.19533	9.62173	10.1304	9.27617	10.2572	10.621	9.81629	10.7398	9.84881	10.1626	9.62277	10.0529	11.5221	10.111	9.4722
AHSA1|10598	6.88265	6.96237	6.90731	7.54605	7.05808	6.68013	8.00679	7.08607	7.70352	7.03026	6.76785	7.23151	6.89748	7.31254	6.95316	7.10475	7.57185	7.5536	8.06509	7.18087	7.30019	7.42307	7.57806	8.2933	7.96049	7.23226	7.90728	7.19122	7.82292	7.7094	7.68588	7.01691	7.55031	6.6573	7.27587	7.87613	7.15226	6.75378	7.92323	6.88927	7.25526	7.30835	7.67275	6.43093	6.98292	7.91986	6.84304	7.18456	7.08382
HSPA5|3309	8.56148	8.71339	8.62298	7.84444	8.52038	8.4689	8.94138	8.82053	8.49322	7.77219	8.41901	8.29219	8.3056	7.9515	8.49187	8.0068	8.6509	9.34602	8.6064	8.23962	8.01799	9.22021	8.71928	8.50156	7.9385	8.48168	8.15004	8.33217	8.71081	8.06618	8.89241	8.34933	8.37771	8.67919	7.94549	9.03021	8.63398	9.34394	9.39099	8.20784	8.00412	8.57372	9.06209	8.39467	8.44654	9.01171	7.71489	8.2258	8.15058
SHFM1|7979	8.06816	8.4393	8.17777	8.56782	8.26327	7.83781	9.37181	9.53906	8.65629	9.48929	8.35845	9.57739	8.60228	8.15043	9.13285	7.4786	8.39247	7.77388	9.09454	8.84767	8.29038	8.3502	9.51566	8.59236	9.31616	9.21324	8.3709	8.72054	9.31264	9.50947	8.77591	8.71591	9.11145	7.87489	8.68859	9.76284	8.62052	9.02027	9.24279	8.28138	8.51324	8.14701	7.77836	9.33496	8.72277	8.314	8.49017	9.15572	8.90158
C7orf42|55069	5.70552	6.08767	5.89555	6.13294	5.82867	5.58394	5.8621	5.83966	5.97032	5.58672	5.76839	5.83407	6.23003	5.70986	6.48731	5.37343	6.10148	6.18079	6.15644	6.41424	5.57753	6.05239	5.91119	5.84764	5.59299	5.8091	5.94171	5.94935	6.56052	5.74293	6.15376	5.55999	6.23917	6.24649	6.58713	6.01355	6.09777	6.46131	6.62838	6.0286	5.95853	6.07196	6.12669	6.03588	5.68389	5.82322	5.98964	6.16219	5.40572
SPTAN1|6709	6.87114	7.46318	6.90274	7.30961	6.96199	7.16906	7.61864	7.7337	7.31128	6.91137	8.21864	7.09137	7.7324	6.91859	7.30294	7.70402	7.00658	8.06244	7.38907	7.26285	7.32473	6.57405	7.66603	7.162	7.15091	7.44074	7.71696	6.59343	7.72891	7.09509	7.01795	7.69085	7.99928	6.40248	5.872	7.25114	6.68716	7.6047	8.09514	7.05208	7.52309	7.36602	6.77855	7.59984	7.47739	7.58493	7.0225	7.21149	6.9567
VCP|7415	7.92962	7.45967	7.65725	8.39442	7.59689	8.04818	7.63091	7.61183	7.54051	7.07329	7.63642	8.37353	8.57094	8.4714	7.70677	7.5199	7.89511	7.34727	8.8099	7.60995	7.74447	7.89725	7.66003	8.24063	7.37219	8.27001	8.17398	8.15887	7.57035	8.39322	8.29732	7.06396	8.17747	7.24098	7.73969	8.56203	8.22988	7.6222	8.49051	7.53928	7.38372	7.95085	8.17461	7.97385	7.90035	8.05797	7.42443	7.67517	7.81476
EEF2|1938	9.24828	10.5071	10.7837	10.0235	10.1894	11.409	10.2137	9.85486	9.91917	9.61305	10.0911	9.23707	10.7391	10.9837	10.5694	10.7027	9.7816	11.2427	9.98585	9.59921	10.8721	10.3007	9.80853	10.9944	8.83712	9.84984	9.34528	9.98908	8.70954	9.79254	9.30959	9.30503	9.46459	9.26175	8.06776	9.99335	10.3465	8.90862	10.3833	10.2739	10.0796	10.0041	10.5048	10.6086	9.91468	9.63792	10.2128	10.0678	10.2919
PSENEN|55851	7.42597	7.6886	8.09738	7.65915	7.49872	7.44748	8.11216	8.66904	8.66133	8.11074	8.24831	8.22042	7.71866	7.13927	8.12634	8.21889	7.62644	7.84715	7.63718	6.80426	7.2453	7.21529	8.13403	7.98139	9.61151	7.82162	8.22427	8.05244	8.32947	7.96844	7.6816	7.9623	7.58001	8.13853	7.73867	6.6903	7.59673	8.09545	7.88701	8.10593	8.12023	7.33559	7.73406	7.387	7.8742	7.38683	7.91033	7.59131	7.72082
NONO|4841	7.51216	8.11791	8.21552	7.92694	7.77466	8.85386	8.20276	8.03566	8.04567	7.82486	8.16141	8.43753	8.7338	8.29143	8.21817	8.17461	8.34332	7.35703	8.44407	8.05146	8.29775	8.37624	8.3321	8.47909	7.48378	8.93442	8.86797	7.66356	8.08064	8.20492	7.6272	7.19948	8.87057	8.00663	7.5645	8.28251	8.34239	8.55994	8.7677	8.5743	8.26315	8.55532	8.17912	7.7652	8.3866	7.70609	8.3908	7.91335	8.33975
RPS6|6194	10.764	11.5663	11.8707	10.9895	12.0009	11.1017	11.126	11.6682	12.8593	11.4976	10.732	12.5945	11.4632	11.8884	11.3617	11.95	12.081	10.2847	10.5939	10.3526	11.9156	12.1991	12.1534	11.1027	11.7771	12.537	11.5804	11.311	9.75868	11.4508	11.5134	10.437	10.2514	13.3712	10.5137	9.7826	11.4832	10.3985	12.3073	11.982	10.7451	11.3826	10.7288	11.1939	10.7595	11.3755	11.8962	11.2811	10.9153
PGAM1|5223	6.4981	7.64127	7.41374	7.41889	7.46509	7.79075	8.27975	7.49579	7.66588	7.29464	7.66851	7.46467	7.60096	8.55828	7.95816	7.88525	7.99354	7.74903	8.05873	7.83871	8.4369	8.0207	7.56313	8.74093	7.03699	8.00836	7.39951	8.17401	8.22267	7.78168	7.74844	7.32469	7.55175	8.99451	7.17371	7.22981	8.12472	8.6734	8.12507	7.85356	8.09337	7.91339	7.75932	7.33783	8.13249	7.46391	7.32341	8.20627	7.5268
PRELID1|27166	6.46001	7.09126	7.55466	7.52111	7.09469	7.26513	7.97665	7.33097	7.43737	7.35564	8.06763	7.8715	7.0282	7.50527	7.84327	6.44995	7.0724	6.7268	7.81375	6.88862	7.62144	7.08251	7.50158	7.45294	7.26779	7.20836	7.46534	7.07731	8.06077	7.2025	7.31477	7.28678	7.52263	6.66798	7.34039	7.37522	7.64883	8.25234	7.14497	7.27134	7.27532	6.67741	6.89543	7.51919	6.5547	6.91278	7.52657	7.36461	6.97352
PPIA|5478	7.35032	7.33442	7.55691	7.76332	7.6003	7.25313	8.34155	7.90538	7.81168	7.87771	7.7284	7.99065	7.51412	8.11503	8.15247	7.61351	7.4851	7.94944	8.2137	7.87367	7.81428	7.5887	7.77907	8.21578	7.82085	8.47037	8.03499	8.39802	7.85681	7.61712	7.82963	7.55361	7.77766	7.32382	7.57966	7.61721	7.48195	7.70805	7.2016	8.16646	7.73206	7.88109	7.68618	8.43032	7.38054	7.67282	7.45629	7.52962	7.58052
BUD31|8896	6.20679	6.8578	6.50542	6.812	6.756	6.61221	7.81159	7.58197	7.14392	7.5623	6.8749	7.2963	7.06517	6.818	7.47401	6.36196	7.43654	6.17435	7.55694	7.37042	7.04526	6.84657	7.36769	7.58598	7.6282	7.70754	7.18233	6.55072	7.652	6.71103	7.29916	7.36814	6.85837	6.62656	7.25453	7.78531	6.98667	7.33796	7.2976	6.99168	7.03013	7.21377	6.15665	7.76276	6.78065	7.11213	7.06203	7.44125	6.39841
PSMC2|5701	6.20731	6.93458	6.51637	7.22102	6.67608	6.79056	7.36659	7.03425	6.94795	6.8445	6.60893	7.07863	7.18677	6.77122	7.70756	6.02458	6.71577	6.38872	6.79244	7.82135	6.52688	6.05824	6.5854	7.43227	6.56041	6.52823	6.86444	6.53296	7.33873	7.02819	7.43494	6.71075	7.23261	6.8394	7.41256	6.64088	7.14335	7.72634	7.05064	6.60692	6.72023	7.03328	6.36161	6.83978	7.55017	7.03662	6.71029	7.06075	6.91127
SSU72|29101	6.93819	7.21206	6.57964	7.28143	6.59852	7.32607	7.22083	7.01344	7.17038	7.25679	7.82255	8.21005	6.6909	6.49507	7.13703	7.74783	7.38865	7.18539	7.22219	7.48471	7.15161	6.67196	7.48496	7.41081	7.20381	7.66176	7.41357	7.58166	8.12025	7.47242	7.64133	6.97426	7.52988	6.46553	6.63789	7.30267	6.94753	7.21033	7.48933	7.19238	7.18489	7.58725	6.96905	7.74519	7.40649	7.53519	7.02127	7.03944	6.99585
EIF4H|7458	8.74332	7.35795	7.07807	7.40813	7.12541	7.38787	7.72441	6.80958	7.12366	7.16246	7.11259	7.17582	7.88718	7.77534	7.86284	6.73672	7.42513	7.36848	7.64949	8.04694	7.44069	7.80178	7.20643	7.66934	6.81245	7.49413	6.94866	7.34955	7.88646	7.40872	6.98629	7.14889	7.54738	6.71038	7.11313	7.99505	7.87613	7.64165	8.1847	7.68222	7.3463	7.23511	7.0487	7.61274	8.16793	7.20039	7.37827	7.54156	7.41482
RPLP2|6181	10.0328	10.6323	11.5583	10.5078	11.0201	10.4354	11.1319	11.9432	11.8307	11.2769	11.3193	10.8995	10.6442	10.9502	10.3304	10.6591	11.1666	9.95404	10.3311	9.5028	11.4735	11.012	10.9952	11.1086	10.624	11.5167	11.2013	10.981	10.1039	10.9983	10.447	10.73	10.3826	9.66334	10.134	10.4856	10.4704	10.6765	11.71	11.6313	10.3117	10.7905	10.8947	11.2402	9.35413	10.8246	11.9668	10.5296	10.3863
ATP6V1E1|529	6.96388	6.51131	6.80282	7.23989	7.18265	7.58411	7.82049	7.35892	7.53971	6.82244	7.23467	7.06798	7.69786	7.36301	7.85188	6.99921	7.63213	7.79412	7.76993	7.76543	7.26297	7.58188	6.96022	7.69242	6.9988	7.14924	6.66121	7.40554	8.30555	6.77529	7.39736	6.85772	6.57256	7.83196	7.51612	7.18701	7.33728	7.40548	7.02117	7.28434	7.64664	7.32826	6.85144	6.65827	7.91578	6.86757	6.80986	7.39875	6.77308
KRTCAP2|200185	8.67081	7.94475	9.26998	8.49094	8.84364	8.91928	8.40817	9.72963	9.30234	9.80329	8.84613	9.60521	8.84439	8.1465	9.42144	8.84431	8.004	8.95455	8.62681	8.29659	8.11495	9.03029	8.82975	7.93649	9.22125	8.47448	9.49001	8.80418	9.25742	8.63722	8.47526	9.07991	8.92789	9.08018	8.53929	7.94976	8.48716	9.66739	8.84577	9.05532	8.37147	8.70388	8.17206	8.45792	7.79685	8.29579	8.97609	8.16763	7.82816
PSMD13|5719	6.64904	6.44992	7.09647	7.28261	6.8363	7.21283	7.04001	7.00469	7.24374	7.1426	7.70731	7.4405	7.34142	7.26514	6.94276	6.92081	6.72321	6.45748	7.0073	6.39959	7.46486	7.12347	6.53217	7.81829	7.25636	7.25261	6.73535	6.85958	6.82577	7.24272	7.03672	7.3719	7.53442	6.68426	6.36564	7.34351	6.90391	7.70221	7.28055	7.47734	6.85009	6.75135	8.03751	6.96136	6.12877	6.9243	7.61983	7.25974	7.03965
VAMP8|8673	8.01079	9.23089	7.93894	8.16581	8.43743	8.57066	8.7035	8.43105	8.40502	8.77849	8.59148	8.28224	8.57796	8.23151	9.90943	7.54707	8.73033	8.67183	8.95193	8.77996	7.93888	7.94752	8.42164	8.32437	8.82284	8.25708	8.57177	8.44412	10.3344	8.71213	8.86021	9.02753	9.12871	8.45836	8.28968	8.63518	7.65492	8.5858	8.37431	8.28918	8.3676	7.9582	8.4794	9.77178	8.05189	8.40857	8.00817	8.81116	8.58987
NDUFS5|4725	8.26921	9.14083	9.53921	8.48268	7.66871	9.12347	10.1879	9.50207	9.32296	9.46797	9.26847	9.47808	8.79731	8.5994	8.98206	8.7134	8.67971	9.02812	8.51861	9.09195	9.36012	7.96177	8.56236	10.0121	9.31961	9.1609	9.06697	9.45289	8.87881	9.2739	8.9177	8.84882	9.17941	9.8136	7.47638	8.84649	9.43057	8.72778	9.89663	8.48712	9.4442	8.91314	9.05848	10.1176	8.51562	8.68132	9.84355	9.58738	8.53469
UBA1|7317	7.85599	7.59719	7.85651	7.6383	6.92058	9.00721	8.21328	7.76427	7.51973	7.33662	7.93334	7.74107	8.1007	7.59971	8.01719	8.4515	8.19559	8.2235	8.41776	7.62588	8.03359	7.8254	7.5404	7.96858	7.67805	7.96714	8.13606	7.17912	7.78152	7.11233	7.61492	7.42894	8.06223	7.58793	7.19475	7.71147	8.39328	8.0142	7.92867	7.95055	7.62822	8.27967	8.0257	7.32948	7.50432	7.4263	7.09031	7.99179	8.01104
NPM1|4869	8.84441	9.12751	9.38378	10.2572	9.99888	9.74738	9.94541	9.64694	8.63714	9.02889	9.73873	9.60562	9.82717	10.2232	9.92013	10.1126	9.75019	8.83401	9.66893	8.85324	10.2318	10.1921	9.47803	10.3685	9.28915	9.80427	9.85423	8.73406	8.75038	9.22235	9.8084	8.83219	10.1315	9.17354	8.8301	9.58606	9.62061	8.76363	9.237	9.88945	9.41094	9.32749	9.31067	8.93812	10.1167	9.82836	9.63105	9.43869	8.88377
PSMB1|5689	7.86351	8.49127	7.84034	8.38128	7.9583	9.04642	9.21991	8.75682	8.20919	9.45766	8.9947	8.84003	8.71242	7.87306	8.52413	7.46228	8.21908	7.47514	8.02802	7.63527	8.34203	8.30816	8.57967	8.25417	8.46369	9.01792	8.67822	8.79812	8.16926	8.62053	8.60926	8.6203	9.35826	8.78101	7.80747	8.0144	8.87749	8.00454	8.84856	7.63687	8.48776	8.29479	7.9612	8.18901	8.5474	9.29926	8.59635	8.76621	7.9698
NDUFA6|4700	6.3869	6.60364	6.21699	6.22529	6.37285	6.32458	7.17546	7.10175	6.83578	7.22381	6.0093	6.63771	6.3626	6.60966	7.32994	6.2763	7.10619	6.78222	7.26365	6.4756	6.61885	6.5344	6.6621	6.87789	6.21947	7.4121	6.94301	7.05552	5.75709	6.91327	6.63537	6.33944	6.26843	6.51264	6.44359	6.74636	6.67429	6.47817	6.843	6.01058	6.51323	6.6359	7.24961	7.07921	6.59899	6.14414	6.49573	6.57052	6.30349
RAB1A|5861	7.1854	7.49295	6.62217	7.02649	6.93905	6.92822	7.4617	6.6726	6.78002	6.83851	7.42942	6.55115	7.17218	6.99693	8.05998	7.38403	7.92456	7.14736	6.97054	7.42856	6.77712	7.41058	6.92765	6.99766	6.35955	7.2048	7.71517	7.15523	7.72351	6.98789	7.35827	7.33273	7.52228	7.98233	7.78228	7.6048	7.05475	7.5246	7.13711	7.25436	7.11922	6.97958	7.31505	7.01928	7.97288	7.39352	6.59588	7.46497	7.29783
FAU|2197	8.98082	9.78763	10.2253	9.18541	9.52523	9.90186	9.79495	10.5417	10.4469	10.6989	9.77686	9.83786	8.95802	9.62514	9.01453	9.5424	9.94094	9.53189	10.2607	8.88324	10.8347	9.91965	11.9165	9.98825	10.3315	9.86068	10.1479	10.0053	9.38931	9.81052	9.91101	9.63067	9.26957	8.19641	9.04401	8.83895	9.91451	9.66926	10.277	9.35572	10.0831	9.10847	9.95128	10.6212	9.64633	9.57728	10.4412	9.81309	10.1168
C19orf43|79002	6.97084	7.28917	7.28456	6.96294	7.08139	6.94477	7.75956	7.62891	7.48022	7.3226	7.59708	8.14821	7.10204	6.99277	6.95014	6.87232	6.94556	8.21305	7.25833	8.04115	7.21075	6.56092	6.908	7.26456	7.35406	7.69027	6.92636	8.52637	7.53702	7.38784	7.61811	7.60037	7.41256	7.19093	6.57165	7.29509	7.16667	7.0805	7.69008	7.46079	6.96025	7.02333	7.30547	8.59698	7.26834	8.15026	7.65089	7.40815	7.62071
UFC1|51506	7.49343	7.42602	8.42606	7.77996	8.15915	8.1878	8.03343	8.55087	7.92507	8.37783	8.47651	8.36572	8.67268	7.57722	8.09582	7.48071	8.00015	8.17146	7.834	7.82396	7.72125	8.51413	7.99415	7.53956	8.47102	7.78208	8.25615	7.56342	8.34424	7.81725	8.42084	7.44743	8.209	7.88452	7.92029	7.35891	7.6848	7.66765	7.40074	8.33371	7.80274	8.41772	7.96726	8.43849	6.62131	7.78022	8.06414	7.99361	7.18645
RPLP0|6175	9.58283	9.64324	11.345	10.2815	11.1709	10.5124	10.8132	11.0918	11.2212	10.877	9.84864	10.2354	10.9678	11.6878	10.8747	10.4926	10.7892	10.4871	10.8405	10.1981	11.9203	10.6201	10.6462	11.7148	9.97655	11.2481	11.1397	11.524	8.87214	10.9433	9.77859	10.1685	10.0592	10.456	10.2619	10.0107	10.1035	10.0259	10.4851	10.8773	10.834	10.744	11.2749	10.6001	9.78315	10.5628	11.2696	10.4889	9.91832
TMEM219|124446	6.99562	7.1409	7.35407	7.13699	7.018	7.15879	7.20829	7.81272	7.28779	7.33106	7.80426	8.29531	7.18933	5.91835	7.46443	7.41112	7.64305	7.19955	6.67991	7.03701	7.3525	6.95108	7.67077	6.84354	7.76671	7.55636	7.16928	7.3877	8.3225	6.85729	7.2216	8.43962	7.31529	7.00652	7.60466	7.0307	6.53507	7.6904	6.72806	7.27544	7.37034	6.89829	7.18177	7.88451	6.82496	6.59449	7.0857	7.70353	6.7141
PSMA1|5682	7.1204	7.7051	7.11073	7.75124	7.32307	8.41531	7.21232	7.82425	7.37319	7.42944	7.59297	7.35489	8.08668	8.03264	6.94313	7.11681	7.29676	7.30432	7.0012	6.89109	7.71625	7.47209	6.86396	8.70611	7.13299	8.02315	7.83984	6.88269	7.42514	8.046	7.65916	7.17305	7.57916	8.23556	7.08353	7.88578	7.39881	8.14576	7.19643	7.90369	7.10156	7.51541	7.78033	6.76889	7.96228	7.6126	7.27206	7.36121	7.17798
SELS|55829	5.93844	5.80805	6.10744	6.64915	6.44932	6.4504	6.28639	5.70179	6.90494	6.21451	6.70079	7.14653	6.52358	6.35083	6.63948	5.70964	6.57454	6.66832	6.40328	7.08219	6.22043	6.44815	5.22139	6.25945	6.19621	6.01268	6.10696	7.06315	6.03022	6.42096	6.65359	6.21776	6.10355	6.69225	6.39103	6.52465	6.1523	6.63418	5.77186	6.43696	6.89952	6.13309	6.57522	5.56266	5.85745	6.55123	5.97925	6.52147	6.27791
HM13|81502	7.659	8.44012	7.48521	7.5992	7.59951	7.06044	8.78529	7.53126	7.18373	8.28984	7.62342	9.36832	7.75846	7.57291	8.44399	7.49456	7.43395	8.20872	8.30653	8.46827	7.02082	7.9758	8.5925	8.01311	7.77332	7.46963	8.05244	7.58229	7.65071	7.34417	8.04937	7.74709	7.80953	8.02588	7.82173	8.58414	7.54388	7.32016	7.98383	7.92351	7.76006	8.16465	8.53059	8.09456	6.91709	7.71066	8.39294	7.51795	7.75
ANAPC5|51433	5.96889	5.66906	5.99717	5.96074	6.35103	6.43449	6.5694	5.96243	6.21295	5.62818	6.0701	6.15395	6.53266	7.41853	6.50249	6.06396	6.62894	6.71764	6.77823	6.602	5.8447	5.60869	5.76222	6.30026	6.37746	6.44383	6.41612	6.22198	6.18022	6.28644	5.85144	6.2228	6.87743	6.36059	6.91139	6.31074	5.63877	6.27095	6.18864	6.5606	6.37437	6.60525	6.88589	6.25557	6.07069	6.91028	6.59229	6.64454	5.65352
PRDX1|5052	9.24229	10.0311	9.87718	10.52	9.05962	10.3813	10.3327	10.3675	10.3533	10.105	9.98613	11.0604	8.725	10.076	8.62521	9.89481	10.1257	10.216	10.4358	10.495	9.75806	8.58387	10.6093	10.6362	9.85715	9.76458	9.95796	9.75398	10.9466	11.0513	10.8109	9.58719	9.8852	10.4085	10.3579	10.1189	10.0709	10.8677	11.3864	9.19683	9.54949	10.0159	10.6453	9.83384	9.61024	10.2846	9.83552	9.5805	9.39401
DGUOK|1716	5.70746	6.44414	5.86697	5.81147	6.15938	6.4346	6.46298	6.60468	6.30809	6.67401	6.47614	6.67934	6.25114	6.09587	6.11594	6.41457	6.43049	6.41392	6.05735	6.50684	6.17138	5.91692	6.60049	6.30815	6.42765	6.93077	6.64402	6.68702	7.48427	6.21807	6.99395	7.17548	6.80388	6.59565	5.85291	6.34725	5.81923	6.90567	6.37922	6.38278	6.21305	5.88963	6.53369	6.94122	6.96025	5.7876	6.28525	6.82494	6.50148
RNF10|9921	6.40456	6.11504	6.21767	6.60688	6.15821	6.77298	6.88293	6.35815	6.45652	6.33645	6.16291	6.05427	6.87828	6.89423	6.64271	6.41328	6.59877	6.67952	6.59986	6.72091	6.43738	6.1237	5.77905	6.83254	6.47634	6.5491	7.01645	6.52314	6.31742	6.7567	5.98334	6.60774	7.00089	6.79884	6.48537	6.55549	5.9508	7.09738	6.35377	6.72909	6.91513	6.54496	7.26911	6.63869	6.14104	6.82631	6.73071	6.60374	5.87147
H2AFZ|3015	7.73666	8.94982	8.68179	8.83737	8.85984	9.745	8.89402	7.88631	7.71781	9.10945	9.10297	10.1863	9.09767	9.61962	8.44896	8.12174	8.18748	8.60315	8.53031	8.49282	9.33388	8.91225	9.86307	9.09348	8.19273	9.6232	9.45884	8.88577	8.60538	9.6815	8.97964	8.11474	8.70473	9.34038	8.05985	10.0508	8.92277	9.06331	8.15026	9.7491	9.58384	8.61132	8.89709	8.45331	8.70696	9.13	9.05049	8.70647	9.00186
YIPF3|25844	6.993	7.39778	7.29127	7.24405	6.72767	7.75382	7.69699	6.82593	7.27853	6.89849	7.48256	6.81498	7.52953	6.91045	8.92143	7.6614	6.28794	7.36614	7.20088	7.73735	7.08934	7.59029	7.29506	7.39364	6.89805	6.75062	7.81253	6.78179	6.90875	6.68787	6.85125	7.96849	7.87406	7.9006	6.81964	7.25806	7.65988	7.99222	6.75413	7.22432	7.3265	7.65142	7.56214	7.46129	6.54893	7.0279	7.82619	7.56216	7.6561
RALY|22913	6.81502	7.87775	7.01639	6.84177	6.52782	7.41183	7.34973	7.4792	7.30309	7.54276	7.19965	6.47818	7.40135	6.79648	7.35999	7.0211	7.30674	7.61221	8.00044	7.78008	8.11456	6.61996	8.48155	7.4355	7.56717	8.02679	7.66485	7.15277	7.75771	7.39277	7.71835	7.69105	7.65607	6.42968	7.0604	7.99455	6.9788	6.90103	7.66072	7.20248	7.37013	7.24881	7.50024	7.88692	7.87254	7.04891	7.34394	7.21805	7.96993
COX5A|9377	6.85283	7.19127	7.37952	7.86611	8.02475	7.91623	8.51291	8.6376	7.84981	8.01307	8.12068	8.26887	7.46224	7.95116	8.34952	6.87492	7.90408	8.16498	9.9518	7.5431	8.03637	7.87845	7.48406	8.49794	8.15802	7.8414	8.34453	8.27719	7.55465	8.15944	8.13537	7.22846	7.80195	8.74802	6.97789	7.61921	7.74322	7.90008	8.01699	7.79346	7.00603	8.07247	8.03962	6.96696	6.89592	7.84273	7.44644	7.26082	7.82414
ALDOA|226	10.1516	11.3016	10.2444	10.5162	11.0296	11.6058	11.2676	11.3576	10.3802	11.0653	10.3523	11.6667	10.3667	11.1427	11.2356	11.443	11.4367	11.2745	11.4204	10.6079	12.1743	11.4387	12.0521	11.7551	11.2732	10.6136	10.0231	11.4841	12.6565	10.6482	10.7552	11.5978	10.851	10.8952	10.0002	10.7732	12.8157	10.5665	11.1344	11.4052	11.1801	11.2047	10.6146	9.99443	12.1379	9.43699	9.99227	11.2747	10.5765
ATP5F1|515	7.28498	6.36842	7.08631	6.97916	7.74178	6.69846	7.2697	6.8551	6.95956	7.34375	7.38994	7.00358	6.93574	7.79581	6.91154	6.51505	6.85147	6.90846	7.07977	7.14496	7.20575	6.39953	6.98957	7.34404	6.72691	7.52386	7.21216	5.94412	6.66298	6.58008	7.31416	6.50858	6.62995	7.91728	6.65216	6.75419	7.1729	7.27441	5.74008	6.91866	6.80703	7.18529	7.56449	6.58132	7.62691	7.57731	7.35995	6.6476	6.17654
RPL8|6132	10.9888	10.819	11.9608	11.1888	12.7832	11.2739	11.1293	12.2829	11.8313	11.9111	10.5171	11.852	10.8625	12.3063	11.3638	11.6578	10.0048	11.6076	11.6535	10.3766	12.1533	11.6086	12.6357	10.7673	11.652	11.7046	11.1691	11.0688	10.2326	12.2536	11.1898	11.1726	10.4111	9.34556	10.8213	10.8623	11.5722	10.3421	11.4385	11.8486	11.1627	10.6472	10.4206	12.074	10.8861	11.6451	11.5775	10.9838	11.7801
RAD23A|5886	6.85334	6.41675	6.41309	6.86959	6.5022	6.6495	6.85043	6.94702	6.65787	6.51338	6.55228	7.98687	7.11458	7.09831	6.63303	6.44741	6.3272	7.89311	7.23175	7.24228	6.64317	5.88333	6.39662	7.18113	6.41219	6.83082	5.98313	7.62715	7.03959	7.50639	6.41749	6.6326	6.94443	6.49813	6.48422	6.80785	6.85703	6.48064	6.97747	6.88645	6.49275	6.29328	6.90464	7.6108	7.41329	7.15427	6.2399	6.63838	6.95511
SF3B2|10992	6.32008	7.26357	7.17881	6.88685	7.03183	6.79476	6.70631	6.59669	6.85084	6.61449	6.88468	7.0035	7.01571	7.79719	6.38538	7.29952	7.6052	7.33586	7.81897	6.72149	7.97713	7.32555	8.45101	7.6729	7.16038	7.19229	7.00053	6.5366	6.9618	6.83486	7.18327	6.83374	7.3474	6.19888	7.02073	6.85864	7.62953	7.76557	8.02089	7.31107	7.37804	7.55448	7.05899	7.01625	7.29073	7.34161	7.12937	6.75758	6.9858
GDI2|2665	7.47076	8.18972	7.85402	8.85257	8.41155	7.95012	7.81487	7.54063	8.21634	7.65112	8.54945	8.03922	8.3257	8.12888	8.39711	7.93436	7.72531	8.96016	8.22571	9.02151	7.86681	8.22206	8.01345	8.23991	7.05744	8.13313	8.23276	7.91962	7.46991	8.02873	8.18814	7.47152	8.91117	8.69956	8.08637	7.78747	8.21	9.343	7.42263	9.05227	8.17347	8.01379	8.07688	7.54599	8.46762	8.54031	8.20095	7.79869	7.82421
PSMA5|5686	7.09153	6.91358	7.52772	7.83338	8.17438	7.56032	8.21817	7.87526	7.45984	7.44042	7.78916	8.74577	7.70216	8.05168	7.46305	6.96788	7.16887	7.74302	7.57372	8.09339	7.67047	6.94728	7.53863	8.67756	7.76998	8.47249	7.82339	6.7162	7.41632	7.77772	8.14912	7.81495	7.90252	8.16153	6.8721	7.96024	8.02562	8.3919	8.21513	7.52137	7.71107	7.69855	8.10864	7.83465	8.94361	8.35817	8.07318	7.6087	7.74913
RAB8A|4218	6.0384	6.30197	5.89358	5.9888	5.91921	5.923	6.39529	6.51231	5.91298	6.4203	6.03105	6.4157	6.11076	5.99866	5.75667	5.92404	5.81641	6.37426	6.1522	6.74239	6.284	6.14428	5.46641	6.48906	5.94678	6.36281	5.88658	6.21487	5.69932	6.38418	6.70037	5.82212	6.52845	6.61594	6.0494	6.24778	6.1114	6.04057	6.19198	6.55215	5.44705	5.71906	6.3262	6.90561	7.21031	7.45792	6.11281	6.40548	6.25037
ILK|3611	6.60794	6.23433	6.64842	6.74484	6.9179	6.33167	6.39157	7.0107	6.52568	6.78673	6.78787	6.09521	7.15237	7.0455	6.62306	7.23753	6.12679	6.07752	7.06114	6.5146	7.62915	6.72671	6.15593	6.77088	7.19145	7.25222	6.71682	6.45211	6.52772	6.73542	6.63139	7.10112	7.20962	7.06202	6.86039	6.98648	6.59599	7.52332	6.65825	7.46622	7.24294	6.96581	6.74797	6.77707	6.37878	6.79417	7.00167	7.52679	6.14648
VDAC1|7416	7.59805	7.89054	8.54614	8.03561	7.6982	8.10322	8.47882	8.49723	7.00069	7.75814	7.46109	8.47594	7.96586	8.18409	8.61851	8.42783	8.3613	7.94671	8.16123	7.77678	8.08262	8.74797	8.23909	8.82568	7.94357	8.19115	8.71411	7.54689	8.72245	8.02252	8.17793	8.04549	8.51964	7.77437	7.65111	7.9219	8.55289	7.5898	7.98478	7.97769	8.48774	7.86771	8.67549	7.84544	8.03819	8.31069	6.83817	8.19839	7.41752
NDUFA9|4704	5.86801	7.18734	6.56166	6.77845	6.1406	6.49258	7.11349	6.2055	7.2097	7.08683	6.42001	6.3171	6.82559	7.37679	7.09743	5.84871	7.26488	7.21768	7.19908	6.21466	6.58715	6.48472	7.13431	6.70571	6.43539	7.11581	7.56482	6.96623	6.23338	6.68808	7.18269	6.57755	7.96241	6.94234	6.56916	6.76901	6.74004	6.20102	7.21927	6.86845	6.91766	6.8173	7.1269	6.86531	5.9784	6.39095	6.83104	6.96342	5.95154
PRKCSH|5589	7.70733	8.22155	7.61201	7.06166	7.16008	7.2967	8.39788	7.69074	7.83393	7.31714	7.68642	7.32178	7.5034	7.60087	8.21851	7.67986	6.79909	8.82922	8.03294	8.87883	7.83462	6.95313	7.44885	7.64892	7.09083	7.30426	7.04764	7.54866	7.27178	6.94095	7.48876	7.90943	9.41006	6.66095	7.36221	7.62413	8.02774	7.68213	8.40938	8.00002	7.88205	7.52616	8.24941	8.76958	7.60645	7.30758	8.08784	7.95077	7.76949
HNRNPAB|3182	7.4184	7.76553	7.55139	8.15882	7.34403	7.27706	8.09783	7.90438	7.8343	7.59735	8.27039	8.29451	8.04586	7.86051	7.65094	6.61174	8.00905	7.05681	8.01726	7.58044	8.07855	7.53227	7.74498	8.35535	7.8602	8.51121	8.38723	7.03325	7.72567	7.97201	7.875	7.5433	8.32573	7.03942	7.16719	8.02514	8.24972	8.89217	7.81794	7.83637	7.88343	6.87709	7.64667	7.91017	8.27292	7.6083	7.84392	8.06504	8.0232
TOMM22|56993	5.82983	6.48307	6.2493	6.61321	6.4703	6.68062	7.04504	6.30965	6.9504	6.01051	6.24603	6.24684	6.49395	6.78286	6.81566	6.34747	7.09405	6.61605	6.8958	6.2089	6.36917	6.47028	6.96616	6.84087	5.67741	6.79698	6.60971	6.65924	6.38694	6.4361	6.67635	5.91675	6.16742	6.47986	6.091	6.05455	6.44425	6.12851	7.03506	6.40972	5.88954	6.82562	6.15693	5.89503	7.02357	5.99189	6.96897	6.38817	5.843
ANXA5|308	8.27229	9.05726	8.27456	9.05837	8.54183	7.98263	8.07722	8.00526	7.74981	8.33008	8.94258	9.40909	9.38496	7.79407	8.71536	8.33366	8.3109	9.11662	9.04817	8.96213	8.70791	9.01423	8.99019	8.01251	8.37318	8.71745	9.06124	8.34952	8.40417	9.10329	8.41338	8.48065	9.20078	9.16379	8.47425	9.21573	8.93267	9.47086	9.10347	8.37983	8.91593	8.98722	9.18687	8.64127	9.42654	8.54122	7.85248	8.95789	7.97644
PTGES3|10728	7.90207	8.64883	8.04584	8.21471	8.49247	8.85449	8.86583	7.94292	8.32	8.35403	8.36645	7.84469	8.97385	9.09218	7.88656	8.39864	8.49248	8.62455	8.53533	8.30229	8.59577	9.2484	9.16977	9.00115	8.83056	9.19222	9.2078	7.82668	7.71943	8.91931	8.48756	7.94037	9.19981	9.03463	8.20583	8.8188	8.88812	8.85576	8.07842	8.79746	8.28784	8.12074	8.05382	7.72174	8.9738	8.94011	8.16845	8.15499	7.4523
MRFAP1|93621	7.25929	8.93048	7.889	8.47151	8.4596	9.10085	8.3913	7.60116	7.68672	8.16953	8.70664	8.5567	8.82868	8.81841	8.58861	7.70613	7.45631	8.36317	7.41529	8.47993	9.25222	7.82804	7.87483	9.305	8.15682	8.17822	8.07038	8.06868	8.98141	7.53418	8.1442	8.26184	7.79387	7.88959	7.62211	8.09861	8.63285	8.80183	7.47461	8.6875	8.79236	7.96741	8.89366	8.38194	8.86665	7.6712	8.41254	8.76325	8.09689
AUP1|550	6.45068	6.7563	6.93525	6.75432	7.37728	7.66597	7.36769	6.84488	6.92452	7.16472	6.98246	7.05542	7.28503	7.13383	8.6671	6.54213	7.25792	7.42616	7.94374	6.79287	7.08249	7.13127	7.17743	6.50208	7.42092	7.08386	7.63889	7.10037	8.3089	7.07742	7.59269	7.39865	8.16806	6.78016	6.50459	6.81837	6.41824	7.31635	7.81835	7.31047	6.81648	7.07607	7.09293	7.84743	7.10381	6.79564	7.16599	7.2997	7.19954
RNF181|51255	6.72236	7.36361	7.2568	6.72413	7.2183	7.74165	8.31819	8.13149	7.26202	7.86025	7.27127	7.48696	7.36904	7.46728	7.67182	7.59866	8.08282	7.33897	8.3543	7.69945	7.35785	7.59091	7.78344	7.47326	8.6983	7.35162	7.80799	7.85841	8.84757	7.41094	8.03186	8.09953	8.39255	7.80865	7.20252	7.19398	6.81217	7.77322	8.48246	7.22725	7.39351	7.19485	7.78435	8.87714	7.81614	7.34331	7.45654	7.90903	7.59897
CCDC72|51372	7.79074	7.81281	8.4724	8.35566	8.21842	8.09666	9.26289	8.66106	7.92318	9.3584	8.95425	9.42864	7.59644	8.64643	8.53296	8.14431	9.29547	7.60292	7.94173	7.46849	8.92279	7.88997	8.51994	7.90198	9.09159	8.41334	8.02455	8.86276	8.70286	9.06697	8.59078	8.47603	8.06737	7.73271	7.8157	7.89139	8.40554	7.73653	8.75577	7.15827	8.16574	7.77061	8.49274	8.34082	7.49389	8.26937	8.39422	8.44386	8.91898
SURF4|6836	7.54112	7.89406	7.49635	7.61826	7.26558	7.36492	8.76486	7.12352	7.51184	7.35092	7.66392	7.34603	7.54492	7.5491	7.52532	7.61154	7.76416	8.46854	7.55697	7.97074	7.18756	7.89437	7.83997	7.63254	6.47932	7.21643	8.37543	7.17725	8.0826	7.49285	7.42535	8.42166	8.0121	8.08203	7.47121	8.75101	7.58167	8.35511	7.76316	7.86026	7.76462	7.68337	7.82854	8.33335	7.76714	7.62271	7.35211	7.82333	7.70519
SFRS5|6430	7.25286	6.95394	6.99392	7.3668	7.2291	6.29368	7.01425	6.24504	6.97979	6.40123	7.17992	7.10644	7.34123	7.19154	6.67875	7.18882	7.0674	6.19496	6.30106	6.43213	6.34092	6.5699	6.57188	6.26173	7.97998	6.58108	6.65217	6.56115	7.17273	6.99629	6.55107	7.02942	6.69028	6.23202	7.14975	7.07095	6.44223	6.65582	7.03951	6.70811	7.19011	6.98202	7.71176	6.52466	6.64346	7.31587	7.0412	7.54848	6.74358
TPI1|7167	7.6358	8.65678	8.73663	8.63411	8.86301	9.83487	9.70547	9.1824	8.63824	8.71099	8.2775	8.958	9.08309	10.1994	8.34745	9.45685	9.31654	10.0891	9.57651	8.61859	9.63847	9.22639	8.8636	10.0754	8.37337	9.55249	9.04354	9.50735	8.79301	8.87643	8.61085	8.80437	10.2275	9.45088	8.10846	8.50036	9.93477	8.92988	9.55235	9.63734	9.70529	9.12249	8.57422	8.38386	9.51158	8.58385	8.69616	8.90374	8.72481
DNAJC8|22826	5.951	6.50698	6.45852	6.80655	6.23309	6.07725	7.05623	6.81781	6.20515	6.62593	6.59846	6.72266	6.53263	5.92434	5.59936	6.02979	6.8539	5.84877	6.68422	6.53038	6.53268	5.51569	6.14716	6.60504	6.26994	7.08797	6.43879	6.3234	6.78541	6.24872	6.64003	6.26918	6.89277	5.69836	6.21064	6.34943	5.88155	6.76944	7.76212	6.41149	6.48709	6.45146	6.29699	6.79236	6.54894	7.11638	5.93617	6.53475	5.80888
RPL37|6167	8.41025	8.83868	9.46423	9.16826	9.78347	8.52096	9.51677	9.82476	9.45077	9.69065	9.64579	9.76901	8.53996	9.20408	9.09187	9.27142	10.2661	8.38317	9.01799	8.96597	9.86117	9.46369	10.077	8.97194	9.09809	9.28825	9.62052	9.16371	8.03601	9.3328	8.62664	9.25251	8.86656	8.86405	8.54938	8.69369	8.51124	8.47495	10.3682	9.44897	8.93211	9.30509	9.37127	9.62498	9.06497	8.97847	9.59833	9.3148	9.717
TRAPPC1|58485	6.39236	7.45181	6.82565	6.60722	6.87805	7.17698	6.96968	7.04455	6.79278	7.01259	7.23247	6.54148	7.1967	7.59818	7.28681	6.61042	6.76763	6.76657	7.55649	6.83802	7.03452	6.38282	6.80996	6.35862	7.98953	7.26643	7.12444	7.09122	7.44117	6.09478	7.01764	7.87566	7.22464	6.98144	7.23455	6.29672	6.39922	7.22661	7.61387	7.27116	7.201	6.83094	6.83463	7.42311	6.48672	7.10141	6.86513	7.49502	6.83598
ACIN1|22985	5.68982	6.29573	5.93945	5.95462	6.05122	6.50388	6.36796	5.88052	5.74536	5.28955	6.0072	5.93928	7.02429	6.29311	5.43674	6.39018	5.69869	6.44794	6.42457	6.4919	6.0402	5.9752	6.04382	5.70764	6.44779	6.10758	6.1082	5.68757	6.05089	6.08844	5.99161	6.25816	7.12986	5.92473	5.57661	6.17178	6.08475	6.19933	6.55105	6.15069	6.47948	5.63276	5.97201	5.94734	6.41599	6.30358	6.45769	6.10472	6.26275
NAPA|8775	7.81323	7.6944	7.45637	7.23745	6.86167	7.59501	8.22923	7.90829	7.58789	7.86012	7.54582	7.05145	8.08564	6.98265	7.55565	7.25913	8.45221	6.95027	7.19593	6.57801	8.13751	6.81634	7.34139	7.79048	7.56975	7.41843	8.12017	6.91128	7.66069	8.4291	7.0223	7.27271	7.01267	7.15893	7.02096	7.35599	7.77521	7.07188	7.14136	7.35764	8.37519	6.91717	8.11004	8.52728	6.29197	7.45479	7.75871	6.7966	7.60242
RPL35|11224	9.95045	10.6159	11.0421	10.2214	10.7112	11.2929	12.1009	11.4075	11.8893	11.6818	10.7506	11.076	10.0968	10.6953	9.66978	10.8971	11.0934	10.8198	9.86872	9.76902	11.1074	10.7018	10.9765	11.4295	10.74	11.249	10.7625	10.2889	10.1877	11.0513	10.5116	11.2093	9.89879	9.41578	9.25465	9.98249	10.5915	10.1021	11.9742	10.9437	10.5744	10.283	10.5509	12.3242	9.97356	10.3196	10.8155	10.7885	10.8875
SDHB|6390	6.3869	6.47001	5.77848	6.98735	6.54507	6.51162	7.47046	6.95414	6.2304	6.72704	7.13427	7.08931	6.44437	6.59755	6.55007	6.12485	6.92422	6.37009	7.17553	6.69907	7.11033	6.16219	6.75119	7.49293	6.20316	7.30763	6.94792	6.61773	7.15974	7.22687	6.99882	6.67392	6.97269	6.38312	6.42421	6.90191	6.00282	6.48858	7.94938	6.51032	6.8764	7.0001	6.95838	6.55346	6.53446	7.04262	6.15913	6.47774	6.19615
PPP1R7|5510	6.0312	6.51719	6.33647	6.65564	6.54801	6.40142	7.14525	6.08685	5.84741	6.56889	7.28766	6.55883	6.89086	6.73088	6.84956	6.64096	7.43904	5.67432	6.04683	6.52012	6.1264	6.88816	6.52868	6.08749	6.95791	6.28943	6.12459	6.63883	7.77168	6.85454	6.85599	6.95072	7.03532	5.61072	6.55636	6.34844	6.70271	7.05056	7.1339	6.5703	6.48437	6.99767	6.98864	7.25636	6.61205	6.83762	6.39735	6.83236	6.76182
PPA1|5464	7.7217	8.5324	8.19536	9.34885	7.66336	8.11192	7.71536	8.08261	8.94032	7.82555	7.96731	8.79699	7.64151	8.21577	8.97539	7.62592	9.05982	7.5218	8.96634	8.00025	8.5027	8.41816	8.26705	8.15758	7.60099	8.17643	9.00118	7.77518	7.47228	8.67033	8.54917	8.73099	9.05792	8.4793	8.45871	7.28324	8.06771	8.49132	8.11116	8.07729	7.74056	8.6444	7.89822	7.85546	8.47667	8.04675	7.60856	8.02251	8.00379
NDUFV2|4729	7.35288	7.04705	7.71289	8.00948	7.48773	7.97914	7.56423	7.43917	7.02217	9.02799	7.78832	8.77145	7.71675	8.12372	7.75014	7.54976	7.41306	7.40553	8.34804	7.36799	7.54915	7.24617	7.22783	7.34939	8.13883	7.36657	7.72119	7.43889	8.53803	7.78201	7.64882	7.38006	7.95805	7.51452	7.94026	7.40647	6.91387	7.87132	8.22324	7.33163	7.19813	7.55839	8.36419	6.78867	7.42614	7.18793	7.03005	7.43577	6.66908
NDUFB2|4708	7.23787	8.44569	8.11252	8.09729	8.00247	8.07063	9.12319	8.67679	8.34979	9.28162	8.62055	8.44293	8.30943	8.28431	9.43454	7.39578	7.70564	8.24895	8.78488	8.54472	8.38242	7.75087	7.81897	8.13424	7.9897	8.09604	8.5073	8.5017	8.72081	8.4951	8.27644	8.40887	8.45816	7.77963	8.62513	7.74737	8.53221	8.13792	8.97079	8.15382	8.44931	8.47375	7.7362	8.79998	7.44695	7.8517	8.28093	8.55537	8.02206
OXA1L|5018	6.0931	6.68196	6.76053	7.11459	7.11257	6.59295	6.6301	6.7857	6.6759	6.53608	6.5024	5.89749	6.48347	7.17174	6.8193	6.99793	6.68617	6.53922	8.00774	6.57682	7.02663	7.00384	7.11168	6.47667	7.22371	6.93847	6.89565	7.00903	6.42067	6.69212	7.3885	5.96145	6.86018	7.31373	7.40855	6.54539	6.77737	6.32824	8.07693	7.09709	7.01297	6.39422	7.41954	6.07592	6.86337	7.00946	6.89062	6.38462	7.51771
NDUFB1|4707	7.32227	7.79018	7.24349	7.42354	7.92589	7.67049	8.45695	8.35374	8.1011	9.0768	7.60148	9.24263	7.98953	7.92066	8.37978	7.80235	7.94014	7.71857	8.00175	6.67058	7.32622	7.25766	7.69172	7.99292	9.2293	8.38065	7.95972	7.85888	8.56172	8.21473	7.63739	7.40868	7.49156	8.31723	8.07223	7.3787	8.12926	7.254	8.45383	6.88424	7.98398	7.50859	8.21147	7.42335	8.2219	8.08011	8.16984	7.78214	7.29009
SARS|6301	5.98621	6.14766	6.67104	7.00038	7.70387	6.24608	7.20138	6.63908	6.44989	6.66296	6.93118	6.96953	6.60543	7.04494	6.62036	6.59254	6.59675	6.98367	7.3824	6.61934	7.16382	6.36548	7.15453	7.42179	6.40374	7.15973	6.92581	5.88633	6.04884	6.15797	6.87875	6.7424	6.63745	6.48506	6.53101	6.77167	6.82586	7.47915	7.45981	6.99443	7.38058	6.75459	7.49653	6.93341	7.78949	7.29921	7.04045	6.94348	6.51968
TAF9|6880	5.89751	6.78244	6.50075	6.06504	6.94916	6.68101	7.42232	6.76355	5.96854	6.45023	6.36256	6.89286	7.03967	6.88564	7.10313	6.54711	6.32341	6.01255	7.1081	6.06046	6.65249	6.7786	6.5111	6.91079	6.7213	7.21334	7.23055	6.1329	6.96537	6.68962	6.80665	6.27943	5.75377	6.17772	6.36165	5.84293	6.32097	6.61247	6.75662	7.05768	7.03903	6.43311	6.95715	6.43604	6.64206	7.31439	6.25068	6.50912	6.05245
AP2M1|1173	7.66828	8.21102	7.97177	8.20921	8.0673	8.11794	9.47685	9.23058	8.42957	8.31872	8.28141	8.23157	8.56327	8.21266	8.1133	8.62207	10.2449	9.01519	8.23744	9.0398	8.52002	8.0169	7.50442	8.74327	8.1651	8.42982	7.47839	8.19229	9.04376	8.24971	8.54213	8.41741	8.77168	8.34813	7.51644	7.58708	8.41937	9.02259	8.56033	8.01737	8.73942	8.1247	8.28241	8.25223	9.33363	8.57139	8.12969	8.76964	8.07819
HNRNPD|3184	6.31794	7.49227	7.08446	6.75672	7.17356	7.20964	7.22096	6.54289	6.08747	6.97304	7.13912	7.75714	7.70758	7.57888	6.03148	6.89701	7.19513	7.56519	6.85208	7.28446	7.32436	6.96946	7.45341	7.14429	7.03321	8.23728	7.4387	6.99944	7.27075	7.44275	7.13906	6.97897	7.437	6.27547	6.25546	7.42349	6.90955	7.50299	6.73536	7.60902	7.00626	7.31523	7.21268	7.72012	7.43469	7.43181	7.48432	7.2975	7.46652
HDGF|3068	7.86606	8.33582	9.12713	8.64887	8.67572	8.52596	8.81669	8.80897	8.63172	8.33468	7.91696	8.48023	9.17036	8.67272	8.90253	8.06174	8.25732	9.76367	7.94043	8.89858	8.29543	8.89927	8.35394	8.41339	8.24567	8.69662	8.52903	8.15711	9.05592	8.68162	8.24531	8.11821	8.78169	8.31705	7.50847	8.10309	8.93574	8.86263	7.93217	9.43653	8.10506	8.63403	7.84648	7.69643	8.33378	8.7196	8.35671	8.12044	8.55575
RPS2|6187	9.12364	10.2962	10.8889	9.47624	10.966	10.3018	10.6591	11.219	10.8752	11.2265	10.1273	10.6426	10.0319	10.8676	9.66276	10.2329	9.936	10.1384	10.0902	9.53125	11.6428	10.7327	10.2619	10.7849	10.452	11.1732	10.9724	10.5847	9.47104	10.2062	10.528	10.2377	9.69952	9.7399	9.39336	9.5121	10.5326	8.83597	10.1824	11.136	9.57135	10.5218	9.88628	10.7317	10.1729	9.30906	11.5583	10.0152	10.5112
ITM2B|9445	9.02705	8.53676	8.40636	9.08143	8.49288	8.96037	8.81394	8.64839	8.52265	8.64448	8.61161	7.82901	9.0988	8.7183	8.1866	8.06478	8.38064	8.33514	7.87958	8.61789	8.24624	8.46866	8.19348	8.69104	8.93749	8.13644	7.6641	8.61789	8.49455	8.78444	8.77091	8.33865	8.47174	9.03362	9.73814	8.14923	8.74323	9.03379	7.91753	8.12619	8.59764	8.52145	9.10497	8.99093	8.22359	8.89316	8.25069	9.12711	8.08027
RPS16|6217	10.0391	10.3839	11.3541	10.3557	11.1295	10.637	11.1071	10.8006	12.0142	11.4106	10.5799	10.7045	10.4874	10.8275	11.0784	10.9615	11.3022	11.0852	10.6091	9.65494	11.2856	10.2506	11.3588	10.9741	10.6141	10.9535	10.9094	11.225	9.67206	12.9255	10.3234	13.0861	10.715	10.0411	10.3555	9.67131	10.7373	9.63085	11.3565	11.1307	10.6099	10.5044	10.6667	11.1165	10.6148	12.3996	11.9901	10.6633	11.2784
ILF2|3608	7.837	7.92207	8.70937	8.40508	8.66313	8.48125	8.51212	8.48982	8.94729	8.19164	8.1059	8.5073	8.95157	8.63945	8.46735	7.99194	8.17773	9.16915	8.52532	8.88999	8.00825	9.01877	8.80426	8.14394	7.44864	8.5935	9.30504	7.91036	8.22242	8.45798	8.39897	7.5045	8.86684	8.67131	7.83844	7.86691	8.90715	8.55355	8.67964	8.55562	8.18152	8.95624	8.03114	7.34728	8.40627	8.93404	8.17426	8.08974	7.91143
LSM3|27258	6.90913	6.71774	7.39693	7.66922	7.48926	7.51343	8.41162	7.91792	8.03068	7.99545	7.64082	8.33376	7.81953	8.22211	7.39609	8.41944	8.305	7.52356	6.80594	8.02058	7.83176	7.89336	7.20141	8.83269	7.70728	7.1407	7.40275	7.59933	7.67783	7.63571	8.34891	7.1174	7.31081	7.98653	7.82273	7.11373	7.56025	7.35066	7.39606	7.66875	7.06362	8.55521	7.4368	8.4685	8.54601	7.69978	7.73042	7.53981	7.35574
HSD17B10|3028	6.65476	7.19718	7.02023	7.87997	6.07653	7.78133	7.80649	7.46532	7.41945	7.5764	7.50341	7.68298	7.40216	7.08914	7.5825	6.91216	7.97972	7.451	7.99444	8.21212	7.39455	7.05304	6.9145	7.72314	7.01044	7.65017	6.97588	7.34029	7.34409	7.00481	8.41433	7.65475	8.06979	6.18741	6.64289	7.34332	7.47743	7.27922	8.61169	7.25657	7.51698	7.27663	7.34086	7.95259	6.49754	7.03103	7.50146	7.80976	7.3572
NAP1L1|4673	7.4727	7.68373	8.3684	7.77102	8.36248	8.22257	7.54331	7.24071	7.69726	7.74111	7.88005	7.18737	8.43003	8.54116	8.06308	8.27009	8.06747	8.01274	7.45466	7.18644	8.76751	7.04025	8.49573	8.44577	7.81257	8.74477	8.36615	7.73285	7.23303	8.01215	7.98516	7.28199	8.05137	7.95924	7.23426	7.48092	7.52532	7.83069	8.05677	8.57678	8.21613	8.1398	7.68871	6.95585	7.75888	8.39749	8.45847	7.79994	6.83255
C1orf43|25912	7.75826	7.53498	8.96724	8.73253	8.92483	9.46932	8.74423	8.6405	8.73385	8.64292	8.51982	8.47956	8.96976	8.87669	8.67784	8.2659	8.67344	9.14683	8.13113	8.96325	7.76268	9.26266	8.68388	8.57132	7.90863	8.27682	8.89095	7.96885	9.16767	8.78839	8.2494	8.44394	8.21193	9.34001	8.07101	7.94229	8.653	8.73033	8.18065	9.17591	8.15097	8.85322	8.11992	7.26318	7.85851	8.23241	8.3709	7.84295	8.40206
EIF2AK1|27102	6.41869	6.59526	6.18373	7.05224	6.35568	7.16875	6.64679	6.23408	6.22839	6.01534	7.01555	6.61478	6.55411	6.94722	7.20562	7.44119	6.63683	7.15711	7.35441	7.2011	5.92929	6.77807	6.68646	7.46045	6.25209	6.63488	7.14859	6.59071	7.18555	6.63836	6.67623	6.55497	6.95301	7.10792	7.43503	7.1695	6.87059	7.22095	6.78436	7.19974	6.94925	7.03661	6.94501	6.48583	6.97468	7.12338	6.34906	6.3831	6.82053
PRDX6|9588	7.0552	7.61524	7.76963	8.71339	8.28752	8.27118	7.65699	8.7392	7.6568	7.73208	7.67663	8.23047	8.05512	8.51287	7.59203	8.78207	7.97817	8.25805	8.34806	7.9909	7.78677	8.53971	8.43967	8.0992	8.16575	7.26385	8.13201	7.81716	7.62576	7.38669	8.1522	7.53507	8.39701	8.7715	7.97146	7.86289	8.0301	7.98445	7.28797	8.4621	7.30675	8.46145	8.46397	8.3203	8.01118	7.9792	7.82274	7.47269	7.66774
NGRN|51335	7.50232	6.33737	6.53476	6.85647	7.42666	7.33208	7.51164	7.03223	7.37602	6.60179	7.63463	7.77773	7.73601	7.26248	7.17299	6.57287	7.17281	7.25387	8.0189	7.47294	6.722	7.45588	6.48558	7.0602	7.34467	6.489	7.28181	7.33181	7.55543	7.29097	6.44408	6.89862	6.95909	7.36529	6.69259	7.07853	6.48067	7.93401	7.8787	6.98743	8.06824	6.19982	7.48843	6.35119	7.14449	6.72271	6.56162	7.06385	6.71398
PEBP1|5037	8.2766	8.37411	8.32102	8.45584	7.97875	9.32903	6.27535	9.18017	8.74096	8.90422	8.72757	7.81427	8.80378	8.69053	8.38561	7.86419	8.13449	8.71264	8.7697	8.53294	8.80618	7.8191	7.97085	9.27377	8.7336	8.96329	9.43836	8.30326	7.95027	8.56079	8.14885	9.25916	8.74818	7.36258	8.29529	8.41806	7.91321	8.66119	8.18842	8.3595	9.40635	8.20388	9.31136	9.0399	7.69463	8.99618	8.6551	9.08489	8.31683
TXN|7295	9.43465	9.8723	9.3551	10.1839	9.79858	8.78487	11.7956	10.8973	9.51655	10.5817	9.17363	10.144	9.95485	10.5258	9.20927	8.85554	10.3587	9.41216	9.43597	9.98289	10.1433	10.3035	10.1077	11.2948	10.3342	10.692	10.9549	9.21274	11.2119	11.4398	10.3637	10.3329	9.5866	9.95542	9.09071	9.68962	9.92547	10.2809	9.89485	10.3	9.96436	9.45409	9.38485	10.1184	9.45782	9.69312	9.24412	9.90075	10.3765
C14orf2|9556	6.47665	6.9508	7.1246	6.74415	7.32815	6.97148	8.27917	7.98208	7.19004	7.80632	7.52121	8.48232	7.18056	7.79935	8.37635	7.1072	8.02606	7.44389	8.08092	7.64349	7.71041	7.57304	8.41804	7.96326	8.10837	8.25271	7.69189	7.68452	7.87592	7.62334	7.34689	6.85243	6.9722	7.82279	7.66102	6.88857	7.32509	7.14144	8.23661	6.8819	7.43477	7.21398	7.51068	7.01293	6.76488	7.70955	7.49324	7.57839	7.05452
TUBA1C|84790	7.59613	8.45972	7.67968	8.50953	7.7964	8.27246	8.63389	7.81173	7.92293	7.88011	8.06871	8.56282	8.18657	8.59972	7.58055	7.70844	8.24348	9.04492	8.81228	8.20921	8.37119	7.68962	9.03567	8.50688	7.31411	8.60552	7.89721	8.14402	8.45755	8.6107	8.40321	8.16537	9.27276	8.25974	8.13368	9.65318	8.28551	8.0881	8.90563	8.73247	8.03478	8.50639	8.17985	8.1874	8.24243	8.92408	7.34618	8.04719	7.70938
OAZ2|4947	5.9906	6.21873	6.57901	6.6942	6.23003	6.59506	7.26165	6.45242	5.82086	5.63402	6.69479	6.00211	6.85856	6.04487	6.10152	6.47733	6.31506	5.87189	6.49618	6.30755	6.01229	6.72411	5.70982	6.76005	6.04137	5.68187	5.56284	6.50108	5.83511	5.79621	5.91489	5.42078	5.99522	6.07776	5.42574	5.73094	6.11211	7.1321	5.39497	6.15373	6.13448	6.07805	5.80717	6.3691	5.50736	5.87652	5.95226	6.45116	5.58406
RPL22|6146	7.48722	8.36802	7.60721	8.04196	8.2353	7.75931	8.65544	8.02858	7.548	8.39951	8.47325	8.30458	8.06653	7.91339	7.90172	8.64829	8.28982	7.29593	7.0417	8.00005	8.78454	7.91089	8.23334	8.63635	7.36903	8.95298	8.51524	7.82048	7.55566	8.14383	7.80486	7.57397	7.40848	6.98461	7.40487	7.71798	7.40268	7.34785	7.93954	8.45694	8.13236	8.06639	7.23254	7.95425	7.55628	8.16098	7.9463	7.73628	7.6012
PSMA6|5687	7.63817	8.28456	7.73597	8.18978	7.87168	8.5494	8.71799	8.76544	8.3886	8.05092	7.61137	9.55078	8.0563	8.31644	8.70564	7.76676	7.95514	8.30642	8.31208	8.61323	8.00986	7.89873	8.18904	7.86687	8.26263	8.35987	8.29383	8.1993	7.74578	8.41208	8.75635	7.18811	10.5328	8.82628	7.95986	8.15191	8.24197	7.9914	8.98407	7.96582	8.32545	7.5882	8.20893	7.43702	9.07579	8.26739	7.70983	8.81361	8.42313
TUFM|7284	6.35435	7.63043	7.12238	7.19161	7.15421	7.63598	7.71752	6.80737	7.54191	7.66598	7.62175	7.56855	7.14274	7.9652	7.65189	6.86348	6.85622	7.33937	7.98938	7.28961	7.51452	6.79719	7.73118	7.69246	7.71078	7.0902	7.37841	7.02886	7.706	6.78613	7.25552	8.32943	7.01736	5.55595	7.02056	6.94958	7.51583	6.94556	7.15832	7.30555	7.54641	7.43992	7.68921	6.91363	7.30422	6.3442	7.68627	7.15717	7.06516
LOC388789|388789	6.22788	6.63153	6.78907	6.88981	7.17055	7.03714	6.52808	7.87957	5.94382	8.09865	7.23584	7.30316	7.00011	7.08756	7.46875	7.04026	7.09623	7.24001	7.12295	6.90512	6.91639	7.25624	7.95885	7.26116	7.46745	7.72779	7.71176	6.7819	7.32292	7.3511	7.34283	6.65887	7.32765	7.1668	7.63645	7.15715	6.71662	7.06326	6.69216	7.60334	7.99469	7.14771	7.55083	6.99311	6.36517	7.2206	7.05733	6.56108	7.52469
APOA1BP|128240	6.78479	7.06024	7.75843	7.24455	7.18034	8.59474	7.43333	8.43046	8.19373	8.12372	7.27993	7.44905	7.90254	7.65044	8.43024	7.04808	7.04975	7.98911	8.01332	7.2731	7.02986	7.34664	7.28773	7.04112	7.08565	7.10361	7.1154	7.21836	7.71828	6.68632	7.19356	6.87496	7.66306	7.14378	7.54313	6.67361	7.79309	7.5838	7.39646	7.71201	7.13864	7.87498	6.52915	6.77455	6.5351	6.86712	7.55273	6.84292	6.78847
C6orf153|88745	5.62791	6.0387	6.07853	6.52485	6.13021	6.34727	6.20472	6.07851	6.04505	6.2417	6.544	6.34377	6.10148	6.62238	6.47548	6.00133	5.64458	6.69046	7.10189	6.39879	5.87736	6.59953	6.48841	6.85213	5.89986	6.52331	6.20689	5.80414	5.73665	5.91357	6.12748	6.0849	7.26663	6.00598	5.74177	6.45078	7.02926	6.83903	7.0939	6.13641	5.97908	7.11958	6.68238	5.89779	6.34788	6.44948	6.52426	6.2496	6.74326
SLC25A5|292	8.57638	9.10019	8.82087	8.5807	8.11482	9.38639	10.153	8.22149	8.53642	9.10848	9.14713	9.59409	8.87811	9.49321	9.46467	8.89332	8.665	9.83055	9.91978	9.59914	8.97529	8.67619	9.17503	9.65819	7.93432	9.49789	9.29093	8.67575	9.02334	8.9083	9.4757	7.52508	9.49531	8.4976	9.85024	9.47533	9.3251	8.64758	8.3953	9.46797	9.0077	9.58622	8.81507	8.07841	9.04219	8.43185	8.63077	8.61202	9.05379
MANF|7873	7.45865	6.93144	7.45731	6.86178	7.22788	6.52917	7.19702	7.83052	6.68952	6.98681	7.16976	8.02688	6.22538	6.13123	7.37636	6.98211	7.51775	7.02228	7.67556	6.56822	6.99387	7.68771	7.42132	6.1535	7.12342	7.2475	7.12227	7.8047	7.56404	7.1862	7.54748	6.8676	7.57599	7.59002	7.08252	7.4889	7.03511	7.97166	7.40405	6.97487	6.74413	7.67829	7.46589	6.60415	6.85803	7.4595	6.70404	7.01872	7.22814
DPY30|84661	6.35963	7.1321	6.20396	6.12261	6.74782	7.21342	7.30208	7.1669	6.63036	7.37993	7.11847	7.18905	6.84512	7.2057	7.21725	7.16316	6.60057	6.90259	7.61179	6.80123	6.8228	6.85363	6.73943	7.00439	7.45986	7.57251	7.71863	7.17662	7.67406	6.82711	7.69705	6.89498	7.99145	7.10069	6.41717	6.59745	6.9316	7.02368	6.65795	7.03317	7.0755	6.54654	6.80975	7.5003	8.1379	7.05075	7.51557	7.1771	6.56725
ENO1|2023	9.18911	9.49481	9.13162	10.4303	9.9338	10.2016	10.9978	10.5354	9.8061	9.70257	10.2809	11.4867	9.46836	9.66551	10.1732	12.0255	10.3302	10.4051	10.8613	10.1512	10.7098	10.0434	10.2579	11.1808	8.96067	10.5718	9.54635	10.6818	10.9037	10.4243	9.79016	9.75274	11.0192	10.0236	8.58388	10.5577	9.77859	10.6956	10.2304	9.81637	10.6489	11.0037	8.97254	10.0924	11.0241	10.5981	9.28127	9.74059	9.67449
PPM1G|5496	6.37483	7.24848	6.74908	6.22542	6.32696	7.02801	7.25744	6.36295	6.69913	6.9762	7.20172	6.78176	7.01946	7.16363	7.56214	6.81842	6.74263	7.04781	8.12118	7.36328	7.00617	6.61184	7.3225	7.53153	6.63122	7.628	7.42773	6.83576	7.67651	6.68957	7.39286	7.2975	8.1597	5.80104	5.7766	7.07868	6.57673	7.26803	7.55498	6.93273	7.00714	6.63987	7.05112	7.6457	7.74494	6.61396	7.23774	7.11539	7.2351
EIF3L|51386	7.90741	8.43772	8.85789	8.62295	8.6256	8.22062	8.31319	7.96442	8.88773	7.70757	8.28857	7.78938	8.73652	8.834	8.90117	8.80835	9.19891	8.193	8.03446	7.9145	8.68468	8.83695	9.33814	8.85295	7.37052	8.66049	8.38215	8.11135	7.80168	8.22297	7.83829	7.32876	7.27477	8.48697	7.71265	7.30261	8.23938	7.43714	8.32895	7.89971	9.8975	8.92533	8.26418	7.43924	7.93756	8.086	8.42225	8.12088	8.05792
SH3BGRL3|83442	8.11365	8.34113	7.85406	8.54208	7.98586	7.76375	9.18791	8.78497	7.85482	8.6417	8.90004	9.20904	7.53682	6.60342	7.56144	7.47786	8.23399	8.42909	8.00393	8.1115	8.34111	7.3459	7.87656	8.50239	8.61117	8.7501	7.68906	8.59016	9.4058	8.3758	8.4822	8.77089	9.01641	7.69139	7.33221	7.52223	7.32692	8.35941	8.82965	7.77311	8.35075	8.1975	7.80085	8.64538	7.4917	8.28512	8.77451	8.2137	7.54631
MED15|51586	5.80895	5.51661	5.47736	5.68728	5.05073	5.20532	5.77235	5.71276	5.73955	4.91812	5.16105	5.00704	5.63532	5.15686	5.62632	5.81182	5.49305	5.58197	6.15772	5.92318	5.67685	5.5646	5.90044	5.87655	5.22453	5.46995	5.48312	5.4248	6.34018	5.6728	5.15503	5.91701	5.57332	5.50596	4.61182	5.2054	4.92818	5.36264	5.17651	5.78229	5.72418	5.66137	5.48316	5.51194	5.58288	5.38353	5.84166	5.94155	5.33998
DDX24|57062	5.57509	6.52227	6.27935	7.08783	6.38799	7.15877	6.13664	6.37802	5.91261	5.92089	6.29158	6.80744	6.99142	6.25074	6.31715	6.77353	6.40629	6.73369	7.26644	6.27382	6.29158	6.50423	6.79096	6.42508	6.21715	6.49804	6.88516	6.4676	5.70463	6.14353	6.44672	5.82844	6.65125	6.65336	6.63571	6.3467	6.73526	6.20987	6.63958	5.93693	7.0025	6.4486	6.592	5.77676	7.20188	6.67374	6.8969	6.45216	6.15477
COPG|22820	8.13468	7.71044	7.32417	7.53496	7.13925	7.39638	8.6346	7.17349	7.14339	6.61617	7.34603	8.07517	7.39973	7.77572	7.83571	8.26396	6.84549	8.02699	7.43125	8.29257	7.29013	8.25315	6.75686	7.52525	7.54963	7.12766	7.17739	7.71394	7.51604	7.19579	7.72748	7.50547	8.0452	7.88424	7.60366	7.86543	8.20878	7.68588	7.596	7.44247	7.6224	7.34352	8.94878	7.29058	8.44353	7.9331	7.0834	7.41356	7.27444
MORF4L1|10933	7.01117	7.21904	7.20558	8.02665	7.91752	8.04561	8.42096	6.77529	6.923	6.76159	7.88532	7.45427	8.15602	7.59858	6.87384	7.78151	7.90259	7.48022	7.61799	7.48565	7.82876	7.74638	6.999	8.06161	7.25711	7.5479	7.84961	7.34056	7.23368	7.64483	7.29298	6.71191	7.68151	8.69825	6.9838	7.08992	7.50051	8.21636	6.98896	7.78832	8.21625	7.6016	7.65498	6.73778	7.78779	7.53475	6.99452	8.10124	7.44728
RNF187|149603	6.95884	6.84583	5.78564	6.92297	6.38248	7.50497	6.98997	7.26168	6.52698	6.61018	7.08804	7.02524	6.85377	6.82288	6.77142	5.79256	6.80591	7.10899	7.43133	6.32536	6.72449	7.16945	6.60778	6.44348	6.47696	6.6747	7.14528	6.44558	6.05109	6.1316	5.615	7.29038	6.65592	6.51586	6.9534	6.15781	6.48521	6.93149	7.41772	6.7219	7.0758	6.72589	6.52911	6.13423	6.27978	6.04449	6.45659	6.42047	6.37488
HAX1|10456	6.67751	6.85253	8.11499	6.93936	7.69309	8.0163	7.27967	7.63609	7.49376	7.41421	7.56203	7.59974	7.57626	7.12473	7.59281	7.13564	6.9392	7.78612	7.61388	7.65372	6.81472	7.85148	7.95693	6.66943	7.18176	7.43376	7.28472	7.24017	7.96144	7.26448	6.68838	7.35317	7.34188	6.77734	7.20263	6.90441	7.04539	7.49727	7.33518	7.55557	7.0071	7.1678	6.90299	6.56424	6.56512	7.05693	7.00323	7.27781	6.66809
TMEM59|9528	7.68072	8.39666	7.77829	8.27029	7.72791	8.44194	8.76562	7.79616	7.79224	8.1281	8.4508	7.97241	8.30104	8.25902	8.93465	7.2313	7.66399	7.97766	8.29679	8.72283	7.74545	8.64156	7.54138	8.55052	7.41267	7.97031	8.29934	8.1277	8.79886	8.16934	8.8532	7.88084	8.38142	9.74792	8.66684	8.05351	8.56363	8.96204	8.11514	7.58868	9.124	8.13055	8.9153	8.31334	7.54788	8.55634	8.32327	7.75598	8.43119
CUTA|51596	7.66967	7.7837	7.62807	7.50601	7.41207	7.96426	7.21138	8.2331	8.02051	8.10061	7.70016	8.0718	8.157	7.59046	8.69642	7.1605	8.00872	6.81401	7.10718	7.43236	7.98873	7.52744	7.5593	7.88492	7.61863	8.07337	7.86936	7.49597	8.09297	7.06639	7.75264	8.35503	8.31705	6.44346	7.69998	7.59674	8.23874	8.1227	7.11178	6.92541	7.58199	8.10721	7.25035	8.28379	7.21117	7.87007	8.18012	7.89114	7.1108
SSB|6741	6.54438	6.72891	6.86531	7.03352	7.28858	6.64055	6.89361	6.93778	6.85313	6.85963	6.16881	5.94197	7.30145	7.252	6.65095	6.97627	7.58655	7.00323	6.88996	6.69775	6.10132	6.7804	6.79622	7.13075	6.80719	6.76458	7.07865	6.48838	6.77799	6.66314	7.51789	6.88751	6.82831	7.01456	6.53645	6.85253	7.08308	7.41361	7.38158	7.18733	6.74456	7.20583	6.34262	6.8845	6.62171	7.36725	6.96398	6.86283	6.56477
TMEM50A|23585	6.57748	6.75739	6.09813	6.86763	6.58857	6.229	7.55694	7.03078	6.34805	7.09801	7.35286	7.29593	6.75821	6.05782	6.47193	5.98429	6.80904	5.8667	6.60277	6.90713	6.48568	6.18681	6.44797	6.57392	6.56484	7.06962	7.2463	6.51917	7.10277	7.17106	6.79183	6.52625	6.98699	6.65126	6.49759	6.40042	5.94193	6.67255	7.59653	6.53863	7.16818	6.94265	6.6966	6.65313	6.22017	6.95998	6.46458	6.54315	6.32063
RPS20|6224	10.1689	10.27	10.5217	10.1079	11.7507	9.86302	10.6305	11.4293	10.4617	11.453	10.0271	9.76681	10.112	9.69099	10.3166	10.5706	10.3134	9.59093	10.054	9.76235	11.3239	10.3011	11.7588	11.2566	10.26	11.0896	10.9096	11.2618	10.0793	11.3017	10.8325	9.66501	9.88121	9.84177	10.833	10.4405	10.154	10.2126	9.69718	10.8701	10.178	9.81186	10.203	10.737	10.2208	10.8713	10.8028	10.7076	10.4004
BSG|682	8.53441	9.44729	8.96491	8.72755	8.47566	10.715	9.86135	9.56573	9.17159	9.10886	9.5169	9.03536	9.21513	8.80127	8.69769	8.76367	9.7766	8.62623	9.81907	8.3795	8.95341	8.65918	9.36587	9.26907	8.87848	8.77011	8.82442	9.73189	8.9122	8.58079	9.25449	9.3676	9.79737	9.34399	9.03744	8.2544	9.19698	8.82853	9.02375	9.66426	9.09329	8.822	9.6063	10.6826	8.96553	8.09619	9.09496	9.16005	9.53468
C3orf1|51300	6.53207	6.02268	5.74102	6.56538	5.98433	6.38756	6.638	6.02184	6.23134	5.64093	6.43343	6.31231	5.48179	6.05548	6.04622	6.78367	6.41106	5.66762	6.15929	6.58089	5.92413	6.15106	5.79877	5.78494	5.703	5.57587	5.24445	6.26268	6.50322	5.47071	6.48279	6.58548	6.31449	6.16592	6.82577	6.08814	6.43897	7.36384	6.65146	6.22808	5.85578	6.39577	6.59071	6.08734	7.1788	6.31318	6.03331	6.28303	6.51659
PSMA3|5684	7.05224	7.71215	7.28428	7.99268	7.02637	8.27621	8.08684	8.14046	7.68213	7.45832	7.34632	8.69231	7.46124	7.32976	7.17168	6.88557	7.80644	6.82121	7.811	7.64812	7.44428	7.16364	7.33548	8.36329	8.14128	8.0423	7.80842	7.64719	7.3814	8.13715	8.21234	6.53937	8.14033	7.70879	7.56996	7.42163	7.91046	7.20454	7.79339	7.05554	7.58173	7.46851	7.79643	6.84708	7.81962	7.75438	7.34731	7.02244	7.03573
ELOVL1|64834	6.4918	6.69625	7.41952	7.2015	6.6497	6.08112	7.38198	6.66521	6.8344	6.89393	7.35868	6.85906	6.35719	7.00112	7.10384	7.08431	6.36436	7.08923	7.44432	7.40615	6.67931	6.13848	6.8438	7.25304	6.14472	6.48027	6.38799	6.91087	7.83605	6.72893	7.87662	6.43237	7.46904	7.68997	6.8335	6.99779	7.40467	7.51141	7.43766	6.60829	6.71597	7.47001	7.27398	6.52246	6.50651	6.50939	6.92667	6.66172	6.1567
CTSD|1509	9.56824	10.657	11.7984	10.024	10.2323	9.70371	9.53117	10.7061	9.96122	10.0433	10.933	8.33712	9.55504	8.34536	10.3654	10.0321	9.03003	9.85669	9.96096	10.3427	9.52033	11.0171	9.66442	10.2469	8.83719	9.46426	8.9764	9.81489	10.21	9.9552	9.51123	10.4988	9.97219	9.17737	10.0958	9.9544	10.5715	10.5029	9.55783	10.3148	10.2342	9.6356	9.93849	9.4409	8.73101	9.69712	9.2139	9.58473	9.95208
NDUFA12|55967	6.43866	6.35548	6.50849	6.52236	6.78625	6.76166	7.57032	7.39908	7.17464	7.39641	7.11903	7.30957	7.07537	7.69627	7.28317	6.72941	6.95589	7.21908	7.25362	6.71973	7.10836	5.84974	6.38762	7.40855	7.69976	7.79318	7.74577	7.25976	6.84127	6.62724	7.59298	7.20507	7.82586	7.35973	6.84278	7.13551	6.23755	7.22264	7.09268	6.92201	7.60541	6.73541	7.20077	7.21458	7.00126	7.34885	7.36029	7.39395	6.36327
DAZAP1|26528	5.50208	5.78779	6.05803	5.7846	5.68034	6.3092	6.01119	5.50853	5.89361	5.56547	5.98239	5.5208	6.17343	5.85702	5.21059	5.78224	6.13576	6.38995	5.56926	5.69706	6.28446	5.65832	5.98731	6.04787	5.88347	6.59263	6.01719	5.65842	6.18753	6.16991	5.47725	6.40517	5.95576	5.0626	4.40903	5.84591	6.04652	6.06668	5.9141	6.61702	5.38618	5.848	5.872	6.65933	5.67612	6.19871	6.26026	6.03988	6.38028
GORASP2|26003	6.74352	6.57032	6.65595	7.11703	6.70878	5.98023	7.27882	6.92154	7.21252	6.30514	6.5117	6.78947	6.97207	6.86958	7.40869	7.02627	7.0976	7.12564	6.65784	7.13795	5.79753	7.17942	7.00335	6.92886	6.07106	5.8717	7.04727	6.92377	7.65714	6.81605	6.83272	7.18255	6.58214	7.86455	7.63277	7.57113	6.65711	7.33837	7.03874	6.90856	6.67809	6.9827	7.19455	6.88436	7.094	6.82753	6.3983	6.58519	7.03948
NOP58|51602	5.48787	5.87828	6.06107	6.0631	6.88061	5.92725	6.47063	6.55862	6.15151	6.13834	5.66155	5.9375	6.58985	6.72457	6.12084	6.02293	6.36425	6.95553	6.27911	5.6626	5.52375	6.43098	6.57774	6.77281	5.68061	6.53536	6.62798	5.93585	6.49638	6.01671	7.21841	6.25656	6.4517	6.36349	6.07897	6.86371	5.98065	6.06358	6.13781	6.64488	5.68343	6.56255	5.93086	6.22559	6.26441	6.56793	6.3672	6.1409	6.03681
NDUFB10|4716	6.7076	8.03296	7.63477	7.26801	7.62442	7.70192	7.98661	8.26053	7.94793	8.52415	7.80387	8.35364	7.19282	8.08791	7.92482	7.64568	6.90313	7.64701	8.07931	7.405	7.82613	7.69835	7.22125	7.88789	8.69948	8.35601	7.72224	7.43398	8.0846	7.58437	8.00233	8.49597	7.6604	5.80512	7.09618	7.47901	8.2643	6.96813	7.76499	7.75437	7.32373	7.83402	7.82586	7.73686	8.13692	7.12473	7.85749	7.54088	8.34707
C19orf53|28974	6.68047	6.56834	7.05792	6.79957	6.87862	6.76941	7.34346	7.69106	7.31783	7.78145	7.16505	7.45774	6.81945	7.11931	7.33354	6.95512	6.69997	8.10569	7.58423	7.29328	6.81556	6.45111	6.52574	7.19005	7.37328	7.04797	6.3875	7.80105	6.75514	6.6567	7.0167	7.08263	6.69646	6.61166	7.04072	6.81622	6.8388	6.54213	7.40479	7.33859	7.0617	6.76222	7.41443	8.19261	8.05387	7.63449	7.33329	7.45436	7.43081
ACTR1A|10121	5.70684	6.8631	6.03456	5.97383	5.67408	6.78233	6.47242	6.3014	6.45204	6.74668	7.07018	5.42823	6.74771	6.89125	7.03166	6.26	6.53038	5.90091	6.82488	6.89488	6.96825	6.57253	6.69667	7.16158	6.34896	6.75553	7.16616	6.21205	6.23136	6.20795	6.82133	6.18524	6.27071	6.32019	5.90121	6.60113	6.15121	7.06187	6.85089	6.46208	7.27554	6.26921	6.85621	7.06829	5.82318	6.14528	6.94356	6.98731	6.50518
H2AFV|94239	6.93826	7.54562	6.66083	6.80906	6.86126	6.83719	7.6223	6.71624	7.04807	7.37438	7.57529	7.25791	7.69688	7.54064	7.50847	7.8801	7.10483	7.26349	7.38039	7.51539	6.79412	6.846	7.40166	7.13873	7.31996	8.16017	8.10283	7.41345	7.75944	7.7297	6.95652	6.7086	7.24466	7.16076	7.4649	7.8816	7.29876	6.7785	7.06559	7.85836	7.85826	6.99752	6.99416	8.217	7.67797	7.43267	7.57685	7.09858	7.19784
MRPS24|64951	6.4667	6.7854	6.69464	6.64124	6.61353	6.65157	7.30558	6.62413	7.37305	7.37403	6.90609	7.16899	6.51903	7.17321	7.91836	7.03908	6.60062	7.42311	7.98699	6.94218	6.87125	6.76602	7.51305	7.22112	7.11127	7.27354	7.28586	7.81876	7.21288	7.3858	6.88915	7.35196	6.74832	6.64968	7.19674	6.99935	6.65183	6.88066	7.14778	7.29235	6.90492	7.09839	7.2784	8.55564	6.78828	6.69748	7.14621	7.16065	7.50528
PPP2CA|5515	6.17126	6.71895	6.36782	6.50152	6.60908	6.8376	7.34157	6.4624	6.00026	6.512	7.21192	6.92963	7.29187	7.15945	6.85563	6.67624	6.86942	6.33203	6.84515	6.76585	6.64568	6.74969	6.46281	7.41968	6.99116	6.92482	7.54445	6.20757	6.77919	6.83572	6.66851	6.39267	7.167	6.81701	6.23053	6.55627	7.17043	6.57108	6.3564	7.0384	7.23189	6.41904	7.18397	6.78719	6.93362	7.24762	6.1843	6.92263	6.51655
RPS3|6188	10.0781	10.6572	11.3758	10.4272	11.3472	11.0726	10.8375	11.1279	11.6072	11.046	10.7054	10.5985	11.5341	11.5918	10.0655	10.8317	12.0317	10.8218	11.1288	10.7829	12.6466	11.3857	10.9879	11.2912	10.3817	11.3425	10.1212	11.049	8.97943	11.3074	10.7393	10.1905	9.60842	9.54113	10.069	9.84507	11.0424	10.3735	10.9876	10.7884	11.0149	11.0467	10.8312	11.7679	10.6508	10.9251	11.5403	10.6924	11.1669
SERF2|10169	8.10101	7.86502	8.78965	8.66868	9.34	8.74325	9.50326	9.5006	9.60034	9.41264	8.97431	10.1852	8.74946	8.28668	9.38274	8.83294	8.46556	7.66594	8.26678	8.88692	8.47875	8.64862	8.30689	8.82321	9.94505	8.75043	8.73443	9.78273	9.49078	8.95381	9.25689	9.21174	9.40814	9.26077	8.76967	8.19678	8.41671	9.11307	9.24373	8.47475	8.93316	8.35335	9.26385	10.2026	7.98927	8.67303	8.62785	9.35178	8.57483
RANGAP1|5905	7.32617	6.65187	6.62618	6.53235	6.01944	7.31057	6.94377	6.53168	6.42007	5.93852	6.48305	6.92652	6.80671	7.11244	6.49306	6.29247	7.04182	7.4439	7.36342	7.14915	6.72706	6.83416	6.61526	7.73075	5.97664	7.24199	6.40805	6.25943	6.93844	6.50285	6.27461	6.83006	6.79587	5.75464	5.78236	6.86253	6.89991	5.94168	7.65267	6.49065	6.8359	6.64783	6.62569	6.98012	6.1691	6.49552	6.75841	6.77424	6.20691
IMMT|10989	6.04189	6.65804	6.23445	6.56476	6.35589	6.48751	6.53304	6.18844	5.88251	6.00256	6.41184	5.50507	6.37605	7.25501	7.16056	6.3758	6.59053	6.59508	7.42014	6.43277	5.95033	6.63113	6.46208	7.26819	5.51933	6.79695	6.99235	6.57446	7.26699	6.46055	7.00001	6.53699	7.54269	6.66641	6.29101	6.97976	6.28809	6.5956	6.67247	6.2592	6.31972	6.84672	5.80051	6.41547	7.14247	6.62744	6.25519	6.34081	6.35687
ATP5L|10632	7.05404	7.66377	7.30487	7.17346	6.80852	7.10531	7.45207	7.97618	8.04009	8.18388	8.35097	7.99475	6.64126	6.78782	7.35133	7.10882	7.92948	7.31068	7.78621	6.33124	6.79434	7.57099	7.67268	6.70739	7.78197	7.72942	7.24925	7.45884	7.45447	7.79619	7.77266	6.96176	7.34816	6.97557	7.34232	7.56047	7.69627	7.65984	7.51712	7.07518	7.18931	7.74399	7.59482	7.91747	7.36314	7.5574	7.25623	7.19385	6.72552
EIF3M|10480	7.1032	7.78719	8.01329	7.45976	8.09917	7.16447	7.5695	8.19599	7.97006	7.36094	7.61395	7.67307	8.24195	8.0011	10.0263	7.168	7.38171	7.19506	7.37572	6.78114	8.01946	8.30466	6.89477	7.97225	7.65996	8.15564	7.46547	7.0667	6.784	7.4307	7.66496	7.01929	7.50683	7.80691	7.13576	7.11775	7.82631	7.75071	7.57985	8.6107	7.53972	7.64305	7.6997	6.80803	7.42122	7.7667	7.65822	7.66026	7.43881
SHISA5|51246	7.80022	7.07208	7.79371	7.37025	7.5491	7.29436	7.64121	8.18295	6.79114	7.55838	7.7906	8.0046	6.93148	8.20544	7.5015	7.30118	7.08791	6.9188	7.89492	7.03145	7.46821	7.48467	6.85282	7.22105	7.69133	6.96679	7.45433	7.74608	6.98172	7.14523	7.41351	7.62835	7.65449	8.08427	7.22703	7.26307	6.73097	7.98524	7.59123	7.35261	7.26857	6.85927	8.05399	7.42191	6.44475	7.29141	7.38233	7.50296	8.08295
MRPS15|64960	6.06084	6.96477	8.20057	6.73671	5.99741	6.21548	7.15622	6.97428	6.51812	7.84288	7.21348	7.34175	6.5386	6.65987	6.6074	7.25168	6.4516	6.13659	6.95453	6.56655	7.08549	5.96276	6.97691	7.10966	6.90055	7.59386	7.02616	6.58896	7.08897	6.85557	6.86353	7.11669	7.43825	7.21504	6.56008	6.5189	7.28178	7.7302	7.83349	6.57479	6.84044	6.63363	7.23417	7.11807	6.03026	6.51202	7.33178	6.95463	6.14859
PDIA3|2923	8.70108	8.112	9.00261	8.02389	8.74067	7.50344	9.11699	9.2482	8.2637	8.03599	8.9193	9.05012	9.0529	8.0462	8.85693	8.4553	8.24098	8.2749	8.69305	8.35817	7.73848	8.92519	8.31246	8.4081	8.86135	8.52039	8.79467	9.6169	8.90825	7.93564	9.08475	7.97042	9.87604	9.12516	8.1818	8.45057	9.00472	9.3789	8.6927	8.54398	8.78316	9.19029	9.77572	8.19486	7.96684	8.54739	7.89489	8.5851	7.59428
C14orf156|81892	7.24783	7.8613	7.79285	7.54345	7.95663	6.35392	8.92029	8.77567	7.86442	8.92748	7.67239	8.66685	7.85804	7.87535	8.06398	7.68362	8.13254	7.37653	8.27112	6.88232	8.00473	7.93558	8.30092	8.11145	9.03145	8.21517	8.12474	8.26973	7.70745	8.40327	8.47128	7.22828	8.06383	7.96542	7.87188	7.27901	7.98716	7.26418	8.53552	7.18607	8.00081	8.01676	8.23491	7.70575	7.6036	7.93563	7.75038	7.70649	7.45785
SUB1|10923	5.73803	6.20048	5.76066	6.75889	6.276	6.10382	6.66638	6.06817	6.21094	6.44667	6.85769	6.78487	6.20582	6.38714	5.92894	5.84425	6.57773	6.65659	6.33081	6.37573	6.85676	5.86457	6.60783	5.78188	5.81859	6.52811	6.82146	5.61001	5.90178	6.18049	6.14518	6.15347	6.68457	6.12613	6.20657	6.41074	6.21036	5.60074	6.81092	6.49132	6.3211	6.9708	5.83717	5.78266	6.78619	6.94433	6.32712	6.28835	6.06811
CNPY2|10330	6.28364	7.49566	6.90706	6.1535	6.20652	6.64381	7.75496	6.95992	6.9808	6.35846	6.64189	6.58117	7.59782	6.74393	7.23746	7.00237	6.45196	6.9705	6.90207	6.80822	6.52524	7.98504	7.07684	6.20307	6.80993	7.05087	6.49259	7.38944	5.91952	6.27023	6.88182	6.79823	7.10363	6.21336	6.49628	7.4752	6.7549	7.22684	6.48005	6.1215	7.08871	6.34898	6.80176	7.23145	6.42191	6.19716	7.21023	6.73618	6.12684
SSR4|6748	9.69447	8.72007	9.65671	9.08351	8.37508	9.31748	10.6238	9.30658	8.83292	10.3711	9.40469	9.85432	9.41373	8.49434	10.0073	8.48741	8.86556	9.83414	10.3068	10.4069	8.71852	9.02605	9.28561	8.65237	9.4948	9.38794	9.50405	10.6435	8.50801	9.16093	10.2257	9.45675	9.40598	8.76554	9.94501	9.63323	8.36765	9.04709	8.78377	8.97046	8.79365	9.33511	9.79077	9.27365	8.2587	10.2156	9.44926	9.15045	9.34441
NDUFS3|4722	5.85171	6.65143	6.67473	6.41943	6.66959	7.01571	6.96723	6.85491	7.15031	6.98688	6.99843	6.88487	6.89153	7.40723	7.59881	6.27117	6.35235	6.10761	7.46098	7.70072	6.26569	6.96734	6.27008	7.19039	7.1925	7.13141	7.17741	6.40052	6.80281	6.6152	6.86937	7.19477	7.10084	6.97167	6.50562	6.9046	6.52117	7.12011	7.02119	7.10192	6.99058	6.80706	7.15367	6.38889	5.2549	6.73021	6.46726	6.639	6.93535
UBE2D3|7323	7.02057	8.17425	7.43696	7.94745	7.71732	8.06087	7.11829	6.53294	6.44477	7.17315	7.8084	7.78806	8.11578	7.86138	7.70371	7.23415	7.02178	7.13936	7.14739	7.42402	7.52469	7.71682	7.6577	8.10309	6.81014	7.29123	8.13694	7.05324	7.18119	7.8331	7.33169	6.75332	7.23067	9.26134	7.09526	8.40394	7.3277	8.33514	7.44557	7.67382	8.11706	7.49339	7.71114	7.10466	7.12574	7.76371	7.49275	7.65148	7.46367
MRPS11|64963	4.81862	4.77653	5.50677	5.59049	5.4616	5.72593	6.132	5.91331	5.45237	5.51131	5.59181	5.6125	5.75038	5.86412	5.63914	5.23081	6.00889	5.17011	5.69128	5.51806	5.60774	5.6835	5.35255	5.64352	5.50206	5.60236	5.67876	6.17804	5.52349	5.69775	5.69755	5.09171	5.19996	5.3805	4.82062	5.57085	5.43235	5.72587	6.29883	5.36302	6.22271	5.37923	6.12054	5.36343	5.25522	4.93905	4.95572	5.82405	5.49227
C19orf62|29086	6.07197	6.23702	6.12076	6.32416	5.47377	6.19937	6.73531	5.93676	6.20892	5.69978	6.26254	6.51201	6.23731	6.1629	6.25163	5.97923	6.54078	6.29843	6.7577	7.314	6.34694	5.90346	5.55624	6.61785	5.55423	6.05927	5.44654	6.15183	5.90369	6.27581	5.98503	6.08328	6.80771	5.79035	6.08775	5.9042	6.29267	5.99525	6.74697	6.29711	5.97408	5.88169	6.0914	7.00955	7.83273	6.57278	6.28268	6.92053	6.42605
P4HB|5034	9.28428	10.799	10.4269	9.34726	9.31651	9.59804	10.2371	10.3154	10.0203	10.9831	9.95414	9.1141	9.1447	8.4625	10.0533	8.93148	10.264	10.408	9.70435	10.2084	9.96061	9.24743	11.3619	10.4191	8.97036	10.4887	9.91756	9.93073	10.1504	9.25392	10.694	9.53357	9.98132	9.08873	9.7188	10.2334	9.18482	10.4916	9.78094	9.03676	9.76612	10.0379	11.301	10.1097	9.89993	9.83703	8.99412	9.50536	10.0075
FUS|2521	7.54557	7.28248	6.43215	7.78643	7.85984	7.37424	8.31772	8.03902	7.70678	7.89505	8.54525	8.72247	9.061	8.50726	7.63494	7.88058	7.83559	8.3076	8.04524	8.27321	8.13514	8.00039	7.91532	8.32841	8.26414	7.95242	8.06289	7.74373	8.20345	8.2245	7.76436	8.99529	8.93801	7.36312	7.47336	8.35596	8.33929	8.31897	8.82293	8.67266	7.93906	7.727	7.83825	8.51123	7.37081	7.78364	8.67863	8.97041	8.24025
RTN4|57142	7.87568	8.45332	7.79047	8.17789	7.67103	8.20453	8.3268	7.75169	7.83714	7.34836	8.13996	6.91809	8.32166	7.45073	8.50869	8.66422	9.40278	8.64446	8.39552	8.21061	7.4064	7.903	7.96597	8.71138	7.16645	8.03225	8.47232	8.16314	8.48022	7.75653	8.26305	7.80409	8.65608	9.21275	7.75825	7.95277	8.08327	8.37977	7.17038	8.58485	8.78817	8.38692	8.04022	7.36399	8.91954	8.41055	7.24828	8.19141	7.96757
ARF5|381	7.13216	8.26582	7.984	7.79054	7.6226	7.63239	8.33466	8.2955	8.12946	9.08228	8.10579	8.44236	8.05067	7.25555	8.48285	7.19792	8.02376	7.7062	8.44044	8.51416	8.20554	7.01508	7.53766	7.72565	8.35276	7.87713	8.61082	7.90162	8.74033	7.47561	8.29707	8.78292	8.34447	7.43541	8.22134	7.34004	8.32794	8.40266	8.41347	8.7714	8.51012	7.86745	7.36089	8.65173	7.4816	7.8613	8.54073	8.7198	7.83129
SNRPB|6628	6.55634	7.55898	7.69395	7.3874	8.08002	7.50266	7.56337	8.4654	7.5994	8.27717	7.37825	8.37771	7.93866	7.55352	8.00502	7.84672	7.80992	7.5208	8.41729	7.85994	8.08024	7.71872	7.59695	8.07136	8.40554	8.73437	8.3636	7.69815	8.24198	8.29531	7.90322	8.44829	8.98677	7.42606	7.38806	8.07353	8.4687	7.87821	8.72884	9.30002	8.07984	7.57926	7.39946	8.77374	7.08926	8.15937	7.93026	7.9929	8.61544
ASNA1|439	6.48029	6.646	6.70793	6.8115	6.25715	6.49597	7.2254	6.69928	6.51471	6.18455	6.60661	6.68992	7.16186	6.787	6.74936	6.42268	6.28988	7.17003	7.32376	7.94124	7.13009	6.14915	5.8428	7.03374	5.95255	6.53531	5.82104	7.68598	6.17623	6.81205	6.6221	6.0267	7.21888	6.15945	6.61059	6.63996	6.69593	6.51157	6.93024	6.73428	6.4571	6.26791	6.81001	7.78257	7.06595	6.95322	6.51965	7.16706	6.64714
YWHAH|7533	7.27392	7.49427	7.59848	8.06014	8.2891	7.48633	8.40015	7.04996	7.97602	7.12467	7.86425	7.89114	7.98631	7.8054	7.85868	8.26686	8.2426	8.20423	8.06813	7.9557	8.24711	7.5523	7.64629	7.87268	7.62695	8.09412	7.60291	8.11964	8.22856	7.99098	8.07523	7.01307	7.72614	8.2524	7.83974	7.44175	8.0149	8.20738	7.82405	7.9716	9.0729	8.41848	7.43139	7.52758	7.37667	7.61922	7.46417	7.89641	7.95777
RNPS1|10921	6.28643	7.19735	6.58799	6.57172	7.27492	6.86364	7.08486	6.97503	6.98098	6.45709	6.85502	7.75431	6.95643	6.83607	6.09817	6.84392	6.30837	7.47948	7.04433	6.89955	6.91444	6.92864	6.12469	6.83075	7.21678	7.48088	7.56151	6.51598	7.56752	6.90867	7.34541	7.85708	7.46396	6.41263	6.52291	6.96771	7.84443	6.40776	7.11106	7.74085	6.94512	6.76516	6.33869	6.95307	7.38398	6.54092	7.53497	7.30777	7.60751
EDF1|8721	8.26734	9.04177	9.19086	8.6182	8.29697	10.2425	10.152	9.80142	9.58896	9.76812	8.76624	9.87969	9.38676	9.64365	9.23508	9.26967	8.46222	9.25226	8.60945	9.03351	9.41343	8.97569	8.97457	9.62309	9.60339	9.75221	8.77929	8.89203	9.77839	9.45567	8.78979	10.1795	8.42236	6.97853	7.12259	9.40872	8.7703	9.11538	9.19808	8.84687	9.74026	8.06282	9.73386	10.5495	9.15773	8.58571	9.23854	9.42102	9.34228
RPL38|6169	9.75766	10.8244	11.4017	12.0575	11.5632	10.884	11.764	10.6826	11.5537	12.576	11.2125	10.1939	10.1951	12.0672	9.85114	9.97609	11.8124	11.2627	10.3045	10.3138	11.4395	10.6388	12.4047	12.1894	11.7944	11.9863	11.8868	10.3974	10.3481	10.8942	10.7676	10.1711	10.5898	9.91465	10.3678	10.4145	9.82416	10.855	12.1381	10.8413	10.1442	10.642	10.8375	11.3121	11.3711	10.8279	10.8127	10.7552	11.4591
MEA1|4201	6.56128	7.13906	6.82532	6.25953	6.59422	7.98316	7.15405	7.53643	7.31694	7.42562	7.34162	7.60251	7.16567	6.97744	6.94452	7.63878	6.36437	7.50191	7.45209	6.87632	7.22672	6.76236	7.06012	7.41171	7.83945	7.97846	6.34975	6.7559	6.76376	7.03953	7.09119	7.15137	8.14203	5.943	6.37673	6.97168	8.05889	7.64443	7.84921	7.08805	7.24974	7.25912	7.35201	7.43814	7.11537	6.81797	7.81355	7.2375	7.18952
PSMC3|5702	6.201	6.86246	6.7842	6.71837	6.37495	7.60806	6.81483	6.92409	7.16586	6.64205	6.98333	7.39785	7.46119	6.69169	7.60484	6.66849	6.09697	7.0102	6.84064	6.30521	6.62882	6.60075	6.02789	7.59275	7.37674	7.30776	6.02625	6.4403	6.76604	7.16202	6.38864	7.55437	7.36798	5.45208	5.72922	6.84557	6.90529	7.40011	7.07968	6.99476	7.21255	6.57699	7.16717	6.97448	6.16745	6.74999	6.24733	7.36999	7.17364
COX4I1|1327	8.40739	9.10576	8.3953	8.3065	8.36853	9.10311	9.88986	8.89415	8.75851	9.52095	9.21246	9.11105	8.18904	9.29031	9.01184	8.02008	8.71501	8.24097	9.25373	8.9652	8.61922	8.27563	8.96159	8.43095	8.99434	8.96792	9.22499	8.94118	9.05799	9.35373	8.41188	10.2542	8.65957	7.828	8.76996	8.50483	9.48782	9.13779	9.91096	8.40615	9.4903	9.07989	9.56441	10.3075	8.18831	8.38325	8.58517	9.43214	9.24536
PHF23|79142	4.64304	5.02174	4.75591	4.61517	4.86621	5.21413	5.11082	5.01666	4.78266	4.96917	5.18333	4.82012	5.87811	5.557	5.11259	5.00349	4.90327	4.6791	5.1069	4.9365	4.6404	4.97808	4.73472	5.26065	4.83147	5.25874	5.23017	4.90896	4.85002	4.13137	4.64958	4.72511	5.5769	4.67185	4.95359	4.90519	4.75204	5.52386	5.6044	4.83374	5.27355	4.94793	5.9263	4.61747	4.67277	4.7064	4.88088	5.67523	5.17192
SDHAF2|54949	5.01395	5.51706	5.271	5.34143	5.53245	5.8177	5.13157	5.56216	5.68213	5.45623	5.8129	5.16112	4.83849	5.09865	5.07973	5.23611	4.98949	5.76016	5.88838	5.68277	5.66046	5.76006	6.13739	6.00915	5.67757	5.71688	5.82538	5.42735	5.74254	5.8304	5.97232	5.14225	5.80148	6.33018	6.19472	5.6076	5.23194	6.1249	6.364	4.98538	5.46312	5.26264	6.13145	6.00647	5.79488	5.71685	6.07155	6.56937	6.18672
SOD1|6647	8.55942	8.29856	8.06603	10.5061	8.65491	9.89049	9.19408	9.47721	8.45635	9.01703	8.89237	10.7585	8.6069	9.17281	8.68472	8.79959	9.05806	8.78474	9.55932	8.02833	9.35247	8.79977	10.0204	8.48002	8.24952	8.20774	8.46858	9.69278	9.52896	10.2106	8.85127	8.84797	9.04749	8.51809	8.12924	9.87969	8.55239	8.74499	9.11927	8.54164	8.96129	9.02032	9.17532	8.87895	9.72041	8.58151	8.30002	9.2069	8.50239
SEP15|9403	6.84072	7.06452	6.93661	7.39672	7.02067	6.81303	8.01084	7.14925	7.31095	6.98815	7.35563	7.45087	7.27593	7.35233	6.41914	6.58128	6.87442	7.29016	7.20709	7.6824	6.83797	6.61772	6.59374	7.42428	7.25802	7.25877	6.84814	6.89537	7.32827	7.04334	7.17844	6.52048	7.14422	8.13432	6.8572	7.12869	7.07965	8.54206	6.05885	6.82051	7.1158	7.14655	7.16784	7.03554	8.15149	7.21225	6.95155	7.18032	6.4202
TMBIM6|7009	9.08643	9.80799	9.13849	9.39642	9.23273	10.2433	10.1784	8.65628	8.46226	8.98922	9.88947	8.79645	9.60767	9.74252	9.46882	9.26937	9.6803	9.43873	9.08794	9.56511	9.56189	10.0158	9.22621	9.61836	9.14633	8.93616	9.70141	9.27537	9.05074	9.08904	9.03206	9.32826	8.851	10.1012	10.5001	10.5253	9.76929	8.74503	8.75707	9.80058	9.97724	9.03808	9.84619	8.89599	8.93872	9.4817	9.07318	8.98532	8.04485
FKBP1A|2280	7.4081	8.08205	7.57153	8.28362	8.01604	7.51026	8.36697	8.3734	7.61057	8.70065	7.97634	7.49141	8.79675	6.98926	7.78511	7.61873	8.08898	7.93501	8.09098	8.57013	7.99914	8.0344	8.13943	8.14227	8.45658	8.44192	8.11875	7.66853	8.62371	7.68148	9.14314	7.75765	8.34938	8.0453	8.13903	8.525	11.0855	8.65415	7.83787	8.1875	7.7949	8.02151	7.66401	8.74025	7.41556	8.01274	8.39248	8.06658	8.25956
CDC37|11140	6.81312	7.24426	7.15226	6.85277	6.31036	7.09874	7.81853	6.82568	6.88829	6.80917	7.16071	7.26294	7.29346	7.22795	7.12423	6.7861	6.40289	8.2983	7.26199	8.15086	7.43326	6.33693	6.91629	7.36742	6.78992	6.82387	5.58434	7.0545	7.4388	6.93719	7.0098	7.52747	7.31368	5.73389	6.30241	7.54526	6.68956	6.81634	7.39574	7.03219	6.84717	6.35538	7.47031	8.39378	6.98003	6.16992	7.15226	7.72246	7.42573
AK2|204	6.34721	6.74516	7.45035	6.97741	6.56563	6.8456	7.42651	7.39475	6.33353	6.86627	6.99066	7.71311	6.91099	6.00551	6.48849	6.92227	6.84285	6.64263	7.06103	6.98329	6.88289	6.18971	6.64468	7.51567	6.54024	7.13667	6.6209	7.13388	7.74606	6.83548	7.04511	6.63177	7.42395	7.79103	6.33044	6.66788	7.36353	6.59736	7.1871	6.70252	6.82688	7.00999	7.5947	6.71238	6.78467	7.42604	6.02301	6.4471	6.45429
NUCB1|4924	7.47933	8.04992	7.14086	7.14221	6.87794	7.21562	7.36978	7.7182	7.91644	7.36806	7.90593	7.16663	7.61689	7.15719	8.1177	7.64791	7.18951	7.40972	7.57055	7.6179	7.94588	6.53032	7.44984	7.03385	7.63542	6.85719	6.64271	7.01832	6.97677	7.15481	7.05064	7.81635	8.28717	7.08827	7.84749	7.43763	7.36793	7.52946	7.11919	7.70198	8.50603	7.00854	7.51641	7.69237	7.13543	7.21245	7.96395	7.69823	7.38505
COX5B|1329	7.89983	8.78869	8.1368	7.39467	8.07306	9.03762	9.76039	9.68045	9.43645	8.6063	9.42437	8.58599	8.01106	8.75369	8.49672	7.69747	8.67035	9.07633	9.15955	8.48986	8.86438	8.15528	9.11856	9.24247	9.57572	10.0811	8.25255	9.1373	9.5647	8.90758	8.23896	9.23571	8.72955	8.01253	8.22227	8.63524	7.90282	8.35657	9.24826	7.96675	7.98667	7.78168	8.93565	9.13802	8.38883	8.34696	8.83428	8.1328	9.23373
ANXA2|302	9.17111	9.34139	9.2175	10.4056	10.5986	10.1696	10.9803	10.3688	10.4487	8.42829	10.1478	10.1592	9.51756	8.6022	10.3576	9.84055	9.76285	10.9599	11.0118	10.4879	9.96461	10.0379	9.48312	10.5595	10.1491	9.60461	9.11887	10.2084	10.7806	9.85987	9.48765	9.20659	10.3219	10.3165	9.3414	9.17942	10.1394	10.2682	9.59991	9.57726	9.88638	10.2861	10.1267	10.3463	9.56018	10.2547	8.16604	9.91766	9.1182
HSPA9|3313	7.33731	7.7982	7.52546	7.74736	7.93664	8.37716	8.24052	7.40174	6.91286	7.7521	8.43233	7.76837	7.98332	8.7083	8.28639	7.30121	8.09833	7.25687	8.80715	8.38282	7.48513	8.11259	7.67218	8.66843	7.57299	7.53452	8.7052	7.18542	7.94319	8.01259	7.84673	7.17153	8.24105	8.16398	7.9246	9.13515	7.86333	7.36376	7.74006	7.91327	8.12497	7.68108	8.5067	7.40454	7.6846	8.0996	6.75916	7.68672	7.99645
RPL13|6137	9.07069	10.0509	9.87626	9.05544	10.0581	10.1331	10.4235	10.1817	10.1223	10.3144	10.139	9.81635	9.40371	10.2025	9.36257	9.54505	9.9119	9.36708	9.05812	8.80468	10.7523	9.60091	10.742	9.60999	10.0185	10.1131	10.4469	10.0524	8.47908	10.2382	8.92161	10.7073	8.75918	8.74085	9.04788	8.53149	9.46117	9.37322	10.9443	10.4104	10.0556	9.95385	10.5203	10.7255	9.34398	9.42723	10.2223	10.2657	10.3598
ATP6V0C|527	7.03263	8.71017	7.70483	8.18146	7.75668	7.73956	8.49756	9.10252	8.08961	8.83174	8.77794	8.35959	7.02316	7.2124	7.2839	7.5003	7.09939	8.34137	7.88256	8.57205	8.21222	7.97856	7.63975	7.98476	8.64309	8.01875	8.44417	8.72351	9.5202	8.14352	8.14144	9.3818	7.64049	8.14881	7.52053	8.14261	8.56178	7.45079	7.49132	7.80884	7.73914	7.62222	8.1436	8.39084	7.96509	7.45078	8.34161	7.99879	8.78074
UQCR10|29796	6.19712	6.95428	7.13291	6.84604	7.15534	7.32055	7.98994	7.93048	7.42494	8.07233	7.16381	7.67837	7.10755	7.46833	7.94672	7.07089	7.99729	6.94023	7.71904	6.71712	7.30949	7.2144	8.21458	7.52054	7.28027	8.11564	7.61103	7.85714	8.08521	7.66822	7.44351	6.92973	6.77862	7.35705	7.08631	6.82904	7.48591	6.58439	7.5018	6.85141	8.97981	7.24663	7.8609	7.0987	6.42525	6.8364	7.39456	6.91002	7.93598
XPO1|7514	6.76273	6.78013	6.49327	7.04496	6.88592	7.43152	7.11116	6.52549	6.70318	6.37028	6.54582	6.40995	7.26602	7.31272	5.99795	7.18531	7.19892	6.93736	6.86741	7.00868	6.43235	6.69327	6.55673	6.85617	6.77259	7.30366	7.17217	5.94472	7.34009	7.02767	7.18553	6.7324	7.52808	7.11711	6.80058	7.23843	7.03631	7.5271	7.39947	7.07674	6.35577	7.14141	6.19961	6.48917	7.72513	7.55505	6.73855	6.69953	6.49873
EIF3G|8666	6.86067	7.45614	7.58363	6.99532	7.09589	6.96186	7.3878	7.39388	7.05985	6.98411	6.97311	7.23185	7.48104	7.46888	7.25713	7.09272	6.29643	7.58819	7.26908	7.34804	7.88638	6.56774	6.72085	7.30625	6.59906	7.03789	6.01367	7.14741	6.75378	7.02686	6.72043	7.31162	7.20456	5.61851	6.55487	6.96832	6.96808	6.82933	7.30461	7.13401	6.691	6.86011	7.48075	8.09345	7.1426	6.6443	7.23181	7.26258	7.37495
HIGD2A|192286	6.49993	7.21118	7.26617	7.51289	7.35158	6.65447	7.31974	7.93262	7.67553	7.7714	8.10789	7.84613	7.23041	7.52169	8.04611	7.04945	6.9013	6.59314	7.61405	6.92543	7.58274	7.20154	6.86894	7.49868	8.1069	7.93515	7.62694	7.3847	7.9693	7.42201	7.07089	7.34439	7.40118	7.28569	7.06857	7.398	6.27883	6.34845	7.60716	7.42878	7.4782	6.77785	7.55884	7.74291	6.99249	7.50881	7.82234	7.15333	7.36892
CLPTM1L|81037	6.47484	6.32191	6.48052	6.85721	6.48414	6.70732	6.70717	6.30094	6.12058	6.3196	7.5089	6.25423	6.53077	6.69922	7.0849	6.36189	7.0192	7.23506	7.32131	7.46502	6.1666	6.46529	7.37716	6.25944	5.59641	6.02072	6.97435	6.79047	6.76957	6.54619	6.84848	6.68569	6.77914	6.61804	7.38918	6.89345	6.44678	6.67752	7.72043	6.58256	6.48122	7.97679	6.85211	6.27218	6.88259	6.87083	6.54888	6.56488	7.02249
UQCRC1|7384	7.23578	6.64483	7.12725	7.72051	7.03602	7.41015	8.12451	7.20805	6.80658	7.60356	7.43084	7.91307	6.37433	8.21498	8.40143	6.80158	7.73105	7.21487	8.09714	6.58743	7.84947	6.99888	6.55183	7.09919	7.49072	7.19973	7.31531	8.09723	7.76827	7.73472	7.26197	7.35406	7.32859	6.47601	7.39174	7.35947	7.01625	6.76685	7.77353	6.90955	6.98303	7.63453	8.49885	7.09588	7.18285	7.30604	6.64635	7.31886	7.75737
RHOG|391	6.03059	5.84873	6.08832	6.28442	6.14404	5.63909	5.34855	6.17573	6.14274	6.28992	6.25238	5.43728	6.10681	5.70346	5.68725	5.85141	5.62896	5.89346	6.016	5.5602	5.9897	5.52463	5.70873	5.7373	6.50908	6.27961	5.98827	6.32325	6.1886	6.26522	6.20012	6.72102	6.53069	6.06796	5.56583	5.97376	5.41384	6.64443	5.96214	6.41861	5.87077	5.8365	5.90631	6.44971	5.813	6.26756	6.66165	6.20553	6.02851
RANBP1|5902	6.76381	6.76941	7.00115	6.47067	6.76598	6.66461	7.75642	6.9092	7.4208	6.5851	6.82279	7.33221	6.94777	7.30765	6.78428	6.69051	7.23295	6.96375	7.26014	6.99113	7.28301	6.81066	7.21873	7.39156	6.53343	7.93998	7.23245	6.80086	7.00004	7.41001	7.40605	6.77634	6.84785	6.16467	6.15521	6.31648	7.62956	6.82299	7.11637	7.38706	6.78095	7.45659	6.38189	6.23615	7.0865	6.87683	7.08783	6.68638	6.41372
STX5|6811	5.68185	5.93802	5.64256	5.48801	5.58644	5.59019	5.524	5.50033	5.51809	5.07829	5.43105	5.97801	5.26025	4.88421	4.97485	6.06592	5.02051	5.40641	6.02224	5.66714	5.66579	6.17793	6.27491	5.5042	5.32793	5.68641	5.53763	5.5854	5.07904	5.53066	5.78651	5.6655	6.03911	5.56378	6.07834	5.73959	6.22897	6.39241	6.49726	6.63481	5.53508	5.7164	6.19126	5.58086	6.03905	6.32872	5.54393	5.4021	6.0269
NDUFC1|4717	6.19979	7.25424	7.81396	7.31147	7.61052	8.05142	7.34582	7.31126	8.12197	8.49625	7.79117	8.56728	7.901	7.65968	7.82588	6.87871	6.97339	7.27679	7.37996	7.42629	7.57606	7.96981	8.06716	7.64109	7.77531	8.44495	8.10315	7.53853	7.45515	8.18078	7.49994	6.79074	6.87534	7.67384	6.98203	8.08167	7.81861	7.7259	7.75157	7.82701	8.14136	7.36721	7.73185	7.80307	8.3913	7.7867	7.41323	7.51673	8.16611
CD151|977	7.61528	7.61916	8.31485	7.60681	7.42367	7.9355	8.49765	8.8383	8.30193	8.21318	9.04694	8.15336	9.05264	8.33991	8.74843	8.322	7.78211	7.51202	8.33338	8.22688	8.53373	8.35652	8.2305	9.04687	8.67691	8.31282	7.67766	7.32308	8.96171	7.85515	7.73609	8.57681	7.87987	6.99941	7.78942	8.64282	8.10015	9.2086	8.42355	8.76311	8.57419	8.18244	8.12189	8.2398	6.41118	8.14669	8.71468	8.48305	7.38186
TRMT112|51504	7.55786	8.09887	8.52193	8.39096	8.55679	10.0444	8.10466	9.05281	9.00576	8.93826	8.61628	8.87464	7.75942	7.7212	7.58757	8.47969	8.87441	8.36545	8.81273	8.65159	9.57327	8.63654	10.4308	9.25125	9.14439	8.86615	7.44988	8.27149	7.74754	8.95621	8.84275	8.38648	8.06709	7.84682	8.26452	8.00983	8.60239	8.78618	9.30485	8.39142	8.70631	7.74751	8.55525	9.15859	8.37522	8.31835	8.75231	8.76192	8.80721
GRHPR|9380	5.64449	6.91313	6.66926	6.47378	6.31674	6.28494	6.30359	6.26168	5.66644	6.04338	5.85596	7.08448	7.15139	7.05637	6.34557	6.36506	6.59077	6.11974	6.72623	5.83181	6.77347	6.53852	6.81084	6.09678	6.81024	6.95477	6.6746	6.59892	6.51196	6.24461	6.78093	6.12809	6.85454	4.8019	6.36483	6.48462	6.57228	6.40633	7.21312	6.70742	6.21004	6.79174	6.16544	6.27896	6.01709	6.50851	6.21254	6.48364	6.05004
SEC61G|23480	8.08937	7.7417	7.93129	8.32969	8.05644	7.19123	10.0474	9.14765	8.57344	8.53342	8.03519	9.54912	8.22723	7.88117	9.27378	7.15782	8.07536	9.56174	8.49413	8.7436	8.22045	8.63417	8.41317	8.26847	8.04559	9.05565	8.60215	9.58645	8.95993	8.50484	8.35011	8.5744	8.75622	9.37371	8.69907	9.16952	9.04751	8.98867	8.59249	8.63323	8.46764	8.49771	8.65265	9.38726	9.26301	8.37672	8.18191	8.60074	8.54516
DSTN|11034	8.66037	9.02074	8.25783	9.64142	8.9277	8.87964	9.0832	9.07773	9.10051	8.83739	9.0903	8.21138	9.26349	9.10252	10.1888	9.58199	9.22931	9.05482	9.37725	9.67046	9.22477	9.55929	9.38118	9.48995	8.55437	8.96241	9.56153	8.22486	8.8999	9.12835	8.82268	8.11537	9.02148	9.8477	9.48098	9.02176	9.01398	9.6711	8.07328	9.99137	9.94462	10.5652	9.07734	8.54527	8.81231	9.16081	7.97919	8.77185	8.70554
MRPL3|11222	6.59835	6.70954	6.80543	6.8393	7.04554	6.35892	7.67712	6.18782	6.68939	6.41272	6.73913	7.03066	7.12812	7.37545	7.00689	7.1421	6.89824	7.25218	6.30089	7.25028	6.69223	7.01933	6.53633	7.25338	6.42095	6.69665	6.72124	6.63653	6.18984	6.39326	7.47328	7.08916	7.08236	7.18822	6.88939	6.42986	7.63973	7.65804	7.24509	7.07086	6.5661	6.97513	6.61731	6.50572	7.70394	7.35835	6.52281	6.94003	6.63261
RPL36|25873	9.87388	10.8183	11.5366	10.3145	11.158	10.2085	11.7028	11.9985	11.2547	11.768	10.7639	11.6677	10.7098	11.1646	10.1749	10.9521	10.9273	10.1007	10.6481	9.6666	11.8745	10.8303	10.9162	11.3184	10.5363	11.2627	10.119	11.4281	9.18777	10.7352	10.1435	10.217	10.8277	9.51579	9.37762	10.1016	10.6335	9.70508	11.4705	11.3425	10.246	10.2031	11.0457	12.3125	10.2113	9.99807	11.5881	10.4171	10.8547
UBL7|84993	4.72381	5.01366	5.45535	5.40598	5.60557	5.67578	5.66682	5.43699	5.22864	4.95006	5.50582	5.10133	5.97026	5.57012	5.8018	5.16207	5.44623	5.46614	6.22915	5.71314	5.99054	5.20989	4.62306	5.90341	5.44675	5.14244	5.44838	5.77102	4.97558	4.98185	5.29309	5.32266	5.68794	5.92619	5.00036	4.84817	5.22033	5.74987	5.14786	5.896	5.01328	5.04343	5.45905	5.4585	4.74141	5.39528	5.24045	5.32919	4.824
KDELR2|11014	8.20115	8.21096	7.42834	7.90336	7.49618	7.65547	8.26395	7.3917	7.80414	7.46615	8.5496	8.57635	7.65506	7.54911	9.08935	8.41083	7.38848	8.16049	8.26823	8.62684	7.37453	8.53162	7.88346	7.646	7.4929	7.86473	8.49509	8.08855	8.04768	7.62655	7.75498	8.65422	7.75833	8.77208	8.95995	8.98193	8.26955	8.98022	7.98214	8.16717	8.37068	8.03971	8.31504	7.90971	8.42138	7.7815	7.76544	8.03324	7.57875
NAP1L4|4676	6.1825	6.09569	6.4392	6.52274	6.36967	6.77849	6.49643	6.68727	6.4633	6.2855	6.97641	5.76819	7.07536	6.79617	5.64573	6.83899	6.66698	6.25377	6.27343	6.24969	6.67467	6.44359	6.01868	7.22719	6.46401	6.95924	6.7661	5.71081	6.86652	6.94102	6.61154	6.81139	6.65303	6.77145	6.59486	6.77372	6.35539	7.33567	6.6696	7.03521	6.27819	6.23823	6.83106	6.43316	5.53664	6.92765	6.99807	6.76196	6.14645
SNRPD3|6634	6.66258	6.93834	7.0351	6.76413	6.86847	6.69504	7.06373	7.26692	7.23858	6.98203	6.8593	7.3161	7.23098	7.09771	7.4012	7.1745	7.91435	6.71974	7.31139	8.41744	7.34955	7.01669	7.17757	7.96144	6.60656	7.69747	7.38505	7.5371	7.56221	7.21715	7.60814	6.73236	6.94758	6.68351	6.48155	6.66606	7.38333	6.36262	7.18415	7.11896	7.98686	7.33755	7.49959	6.65475	7.68119	6.95362	7.49203	7.29615	7.63063
RPS21|6227	9.97879	12.6837	10.8488	10.1895	12.992	11.1678	11.7794	11.4762	11.4447	11.8763	9.78134	11.5234	9.64805	11.1232	10.5503	10.5258	10.9713	10.7029	12.1764	10.4951	12.3161	10.3633	11.5864	10.2219	10.1064	11.149	10.6543	10.7742	11.0627	10.7819	10.726	10.7	9.81817	9.81615	10.5984	10.0261	10.867	9.95306	11.0537	11.5999	10.1011	10.8678	10.0687	11.1693	10.6467	10.6155	11.0318	10.7141	10.6751
DCTN3|11258	5.90692	6.65059	6.48613	6.08502	6.16154	6.54244	6.18339	6.35584	6.75478	5.91625	6.39727	7.15358	6.73853	6.98144	6.89465	6.94799	6.44738	5.77329	7.76939	6.01071	6.52784	6.52675	6.7791	5.9263	6.78045	6.90857	6.32168	6.43748	6.7522	6.92435	6.23376	6.47565	6.88922	5.6059	6.35314	6.24244	6.55367	6.50729	6.94608	6.58426	6.26766	6.45327	5.63726	7.17314	6.13958	6.47678	6.40613	6.63962	6.38341
IMP3|55272	5.06614	5.76497	6.05408	6.44166	6.56003	6.80988	6.41646	6.42229	5.94956	5.86578	6.52278	6.73541	6.1991	6.52296	5.99498	5.76816	6.36048	6.1085	6.03272	5.80733	6.22497	6.63523	5.70979	6.41811	6.43264	5.80151	6.44229	7.00143	6.49548	6.24674	6.37553	5.69038	5.77696	6.72052	5.41804	5.70203	6.04688	6.08635	5.83508	6.21551	5.61883	6.05353	6.68199	5.63619	5.94228	5.71515	5.83989	5.76085	6.75392
CYB5R3|1727	7.67838	7.11275	6.97149	7.43381	6.87161	7.10896	7.91454	7.38314	8.05836	6.9642	7.26558	6.17105	7.32112	6.72147	7.34934	7.6084	8.05734	7.44151	7.78449	7.18095	7.64936	7.05564	7.68413	7.27148	6.84681	6.71387	7.29302	7.018	6.79159	7.30649	6.69882	7.81814	7.54245	7.15673	7.61124	7.14019	6.98711	7.48105	7.67561	7.21885	8.09958	7.65814	7.32862	8.06081	7.53111	6.98181	7.36659	8.17681	7.06218
APH1A|51107	7.47182	7.52466	8.4624	7.65954	8.27449	8.18449	7.55968	7.99325	7.95073	7.68144	8.18604	7.62404	8.20349	7.92977	7.88426	8.57657	8.98591	8.37777	8.29512	9.61004	7.17442	8.187	7.85391	7.1226	7.06882	7.21399	8.14727	7.42496	6.79605	7.58445	7.75422	7.28059	7.8298	7.98833	7.83974	7.33791	7.89522	8.38798	7.38756	7.60547	7.84628	7.99094	7.1188	7.35882	7.43606	8.02443	8.19581	7.50147	7.64167
UQCRH|7388	8.04784	8.84554	8.5642	8.27943	7.65498	8.09417	9.6375	9.2268	8.94724	9.57233	9.40092	9.73431	8.27232	9.01605	8.66111	7.6992	8.47417	8.87614	9.31853	8.47076	8.44998	7.61223	9.07311	9.12311	7.5912	9.54655	8.64639	8.67158	8.75707	8.81838	9.37542	9.13502	9.39591	8.70211	7.17793	9.02766	8.95142	9.46109	10.0686	7.86182	8.43639	8.64135	8.20005	9.10052	7.93399	8.86394	9.67219	8.83835	8.04008
ATG3|64422	5.92035	6.19281	5.55177	6.26768	6.22176	6.28086	6.49578	5.42499	5.66995	5.86969	6.02651	6.29437	6.13127	6.26791	6.29784	5.88657	6.3364	5.40083	5.93299	7.05594	5.90665	5.68077	5.46447	6.13392	5.51399	6.56929	5.3605	5.85065	6.16139	5.93352	6.27933	6.25101	6.57002	5.99085	6.24271	6.18347	6.42895	6.93239	5.80904	6.11317	6.02079	6.11185	6.03336	5.88066	7.11587	6.44753	5.82115	6.18012	5.87354
ATP5G3|518	5.85113	6.94683	6.61679	6.8667	7.13912	6.53633	7.79707	8.09086	7.30397	7.00319	7.50163	6.85801	6.79619	7.51997	8.05111	6.08137	7.08782	6.84615	7.25305	6.63065	6.27965	7.13226	7.33953	7.1429	6.45388	6.98893	7.04675	7.23472	7.2395	7.09325	7.3696	7.54572	6.52527	7.11938	6.08852	7.88244	6.87986	7.10313	7.23966	6.80587	6.65721	6.89453	7.36853	7.31779	6.51503	6.91851	6.9334	6.92625	7.16931
SCAMP2|10066	6.20148	6.46869	6.7377	7.21134	7.07215	7.61312	6.90987	6.2672	6.63238	6.20375	6.62185	6.81314	6.89617	6.48038	7.51697	6.6714	6.90774	6.8269	7.97052	7.05122	6.67593	6.95538	5.80296	6.52648	6.46181	5.8994	6.92883	6.84359	6.83941	6.91275	6.43557	6.36896	7.14889	7.82473	6.6828	6.50279	6.48646	7.26507	6.46001	7.21664	6.42026	6.795	6.79109	6.12891	6.03837	7.13959	6.42672	6.42078	6.77512
POLR1D|51082	6.15948	6.92019	6.84325	6.57729	7.26055	6.91882	7.10028	6.77033	6.92976	6.29692	5.83875	6.26805	7.01262	7.33703	7.06793	7.31328	7.69573	6.34706	6.27215	6.78973	7.52403	6.88405	6.77457	7.32716	7.26581	6.84645	7.30228	6.2857	6.5295	7.38301	6.56586	6.39992	5.91212	6.44841	7.2745	5.71453	6.94934	7.31068	7.46803	6.64566	5.71922	6.78536	6.96424	6.53195	7.20451	6.7941	6.77815	6.494	7.15549
STARD7|56910	6.26222	6.83679	6.40849	7.33022	6.78361	7.58434	7.14122	6.02582	6.46978	6.9632	6.50975	6.05407	6.97317	7.13218	7.39199	6.55154	7.40779	6.81463	7.34406	6.53313	6.48364	6.69017	7.0149	6.67691	5.9332	8.04428	6.73454	6.28961	7.1558	6.99169	7.04896	6.17447	7.15331	7.02862	7.15552	7.02552	6.64875	6.9588	6.97421	6.62	6.36741	6.76184	6.6322	6.36035	7.46383	7.0221	6.76533	5.89278	6.68841
BCAP31|10134	8.5394	8.24051	7.84345	8.89122	7.98074	9.16201	9.97907	8.52256	8.06393	9.14031	9.31441	8.85887	8.29437	8.15897	9.21535	7.68854	7.89542	9.5119	10.1514	10.0529	8.53576	8.18107	8.45836	8.66462	9.06105	8.05593	8.7382	8.23163	10.2224	8.75515	8.88622	8.10182	8.72267	8.5032	9.44398	8.59096	8.0169	8.48771	8.56173	8.46769	8.91036	8.60146	8.93563	8.61134	8.29992	9.02582	8.57822	8.51034	8.63537
NRBP1|29959	6.681	7.30775	6.26993	6.5009	6.45226	6.99914	7.20819	6.52528	6.12509	6.18068	6.70507	5.87099	6.78418	6.88415	6.68415	6.9936	7.20863	7.11159	7.72608	7.20228	6.98291	6.32507	7.16228	7.39792	6.74795	7.12757	7.6977	6.73511	7.68475	6.63519	7.46764	7.24153	7.93716	6.70447	6.81874	7.43041	5.86555	7.30613	7.34384	7.12166	6.84913	6.75951	6.74503	7.34006	7.97269	6.78511	6.78352	7.38591	7.36607
ILF3|3609	6.19874	6.50905	6.6185	6.31671	6.40891	6.05857	6.52249	5.90661	5.98532	5.83272	6.50315	6.16779	7.17251	6.86517	5.78241	6.53902	5.62624	7.63536	6.42634	6.92085	6.53825	5.91697	6.06073	6.53772	5.63263	6.79661	6.50061	5.85956	6.29491	6.5112	6.35491	6.25404	7.24141	6.12762	5.63618	6.66222	6.48665	6.4161	6.81849	6.62037	6.3343	6.54169	6.08858	6.63117	6.33134	6.26153	6.8165	6.50726	6.49375
RPSAP58|388524	8.66878	7.93237	9.16213	8.25704	9.17082	8.70815	9.5782	8.83287	9.6128	9.32526	8.29728	8.38012	9.09209	9.4332	8.78894	8.67866	9.55308	8.12862	8.34374	7.5486	10.1031	8.70779	8.23336	8.73832	8.24279	9.06981	8.46641	9.063	7.77712	9.02792	8.25522	7.94371	8.0777	8.69871	8.41361	7.71008	8.58031	7.53002	8.66873	8.40206	8.13151	10.0298	8.37934	8.47676	7.66156	8.9538	8.86395	8.15498	9.00778
RBM3|5935	6.71953	8.23405	7.80485	8.13794	7.64456	7.14086	8.33336	6.77834	7.81328	8.25586	8.11627	8.21376	8.41721	8.46937	7.88615	8.27018	8.50102	7.58631	8.10371	7.88993	8.40597	7.53814	7.09664	8.22269	8.04656	7.3141	7.19624	7.75539	7.48365	7.71175	7.49984	6.86357	8.07273	8.09145	8.48032	8.13505	8.42653	7.73175	6.95514	8.86543	8.24472	8.58598	7.85354	7.48925	6.87793	7.88391	8.34553	9.03469	7.67836
HNRNPR|10236	6.15719	6.60915	6.15196	6.51634	6.6093	6.54221	6.82256	5.49429	6.04586	5.91708	6.96889	6.62194	7.51469	6.72672	6.25011	6.60926	6.82491	6.50348	6.42317	7.05036	6.98336	6.36806	6.41823	7.24825	5.83573	6.97295	7.07355	6.09823	6.39973	7.00253	6.54719	6.32735	7.31476	6.555	6.10367	6.88204	6.22672	7.08191	6.98255	6.39432	6.97418	6.97977	6.66539	6.8405	7.03188	7.45086	6.56159	6.76811	6.78506
PEF1|553115	6.07844	6.62092	7.65815	6.21397	5.96606	6.35477	7.18836	7.0223	5.87398	6.77559	6.53045	6.95257	6.60778	6.1955	5.84963	5.77387	6.50452	5.51953	6.64736	7.63444	6.67792	5.6314	6.222	7.40214	5.97964	7.01605	6.86404	6.30104	6.86217	6.81563	6.4851	6.85156	7.16141	6.98567	6.15585	6.42295	6.56998	6.30465	7.46217	6.33372	7.05074	6.17642	6.67256	7.38231	6.99267	6.71034	6.17617	6.30474	5.86958
COX8A|1351	7.52524	9.1766	8.60227	8.03856	8.45597	10.0706	9.26297	9.27279	9.31158	10.0761	9.41659	8.40214	7.88306	8.22963	8.8485	8.41606	9.30065	8.98292	9.53789	8.70136	9.8187	8.71391	11.079	9.57169	9.05648	9.25678	9.23149	8.85909	9.23146	9.35944	8.72988	8.95047	8.52629	8.89906	8.85199	8.69405	9.01076	9.58047	9.74354	8.40065	9.17718	8.45797	9.11836	9.52704	8.19358	8.92267	9.37456	8.32954	9.64657
EIF2B4|8890	4.84756	6.12357	5.05686	5.17013	5.44931	5.58866	5.60523	5.49323	4.93562	5.71236	5.33527	5.14135	6.03121	5.37962	6.07173	5.49969	5.16642	5.42478	5.90809	5.29478	5.1392	5.35757	5.22415	6.03329	5.36881	5.91805	6.38873	5.18608	5.98348	5.02569	5.80563	6.15295	5.87466	5.21383	4.98488	6.06364	5.49539	5.64274	5.75588	5.05402	5.43839	5.68677	6.11863	5.65882	5.78918	5.15935	5.39357	5.60522	5.74091
MTA2|9219	5.60709	6.16577	6.11276	5.95301	5.62917	5.47888	5.46516	5.51009	5.82488	5.59317	6.01134	5.93564	5.73346	5.42853	5.09816	5.48633	5.67091	5.95194	6.14858	6.07968	6.20404	5.82588	6.43696	6.47778	5.55916	6.49274	5.62575	5.40067	5.71461	6.19913	6.27773	5.71847	6.69043	5.36807	5.43376	5.94661	6.15017	6.43646	6.95777	6.43151	5.56069	5.88897	6.45071	5.84256	6.08643	5.98159	6.46726	5.6792	6.19212
ISCU|23479	6.25849	6.28406	6.41081	6.66444	6.31389	6.47663	7.01644	6.42305	6.20275	6.43327	6.868	5.98911	6.65382	6.69823	6.69038	5.87084	6.63196	6.17163	6.51648	6.52798	6.22527	5.33697	6.24902	6.42122	6.86435	6.65992	6.94196	6.57234	5.96584	7.55808	7.21954	6.84077	6.50461	6.61892	6.72201	6.83615	5.24065	6.84199	6.08168	6.38268	7.20916	6.24454	6.7572	7.0177	6.15407	6.77953	7.12547	6.97201	5.91643
UBE2L3|7332	6.38951	6.59912	6.0644	6.31698	6.21108	6.07379	6.65195	6.83466	6.52177	6.57874	6.4522	6.69617	6.51971	6.68812	6.7503	6.41136	7.23515	5.71018	6.54372	6.30943	6.3466	6.41008	6.72901	6.89501	5.99289	6.70339	7.15536	6.46617	6.56176	6.6065	6.63088	5.64798	5.94189	7.10543	6.0687	6.18524	6.73049	6.35014	6.43262	6.15589	7.75835	6.59064	6.73478	5.97489	6.26895	6.29496	6.62856	6.18751	5.68416
NDUFA10|4705	6.21047	6.87618	6.7493	6.66176	6.76293	6.09263	7.27062	5.70103	6.12379	5.62808	7.67016	6.01384	6.8606	7.45252	7.37739	6.1671	7.21754	6.12289	6.94836	6.65979	6.1536	6.91627	6.97273	6.3388	5.80737	6.18067	7.06916	6.91278	7.55055	6.68413	6.6619	7.19527	6.43699	5.87274	6.91766	7.09357	6.42583	6.96629	7.17769	6.35693	6.69599	6.79319	6.81007	6.75129	6.52041	6.83386	7.25917	6.43775	6.88264
GNB1|2782	7.81303	8.11537	7.09267	8.41773	7.60574	8.14765	8.48133	7.59106	7.21359	7.68286	8.65805	8.10276	8.17934	7.36542	7.53707	9.56629	8.09856	7.7736	7.84954	8.64884	8.12315	7.57757	7.72078	8.08045	7.01463	8.12494	8.38927	7.55488	7.7983	8.02587	7.64119	7.73477	8.36147	7.86531	7.39227	8.41552	7.38855	8.22131	8.14796	7.76857	8.31851	8.07131	7.0463	7.77434	7.60391	8.13659	7.3355	7.98256	7.35438
CHCHD2|51142	8.4396	8.75477	8.97434	8.54949	8.60632	7.76808	10.3308	9.45708	9.38759	9.18705	9.2586	8.9791	8.83645	9.35282	9.32651	7.9196	9.54248	9.96698	9.76109	9.84849	9.20135	9.24717	8.94118	9.46145	9.20514	9.35027	8.77077	10.0881	9.69721	8.98723	8.70757	9.55276	9.19453	8.95278	9.11726	9.28321	9.42317	9.14232	10.3148	9.75507	8.92008	8.76041	9.4739	10.3538	9.57008	8.50991	8.80779	9.17499	9.26067
CHID1|66005	5.93556	5.3288	5.67791	5.32365	5.32278	5.93051	5.47873	6.13278	5.4235	5.72268	6.35338	5.098	5.98104	5.86155	6.02683	6.29172	5.4936	5.44429	5.79033	4.9925	6.47286	5.69344	5.94535	5.72268	5.43883	5.75325	5.13794	6.14545	5.65316	5.93914	5.81816	5.59885	5.54672	4.66824	6.03216	6.00184	5.51717	6.07655	5.72863	6.10717	6.0487	6.01265	6.27505	5.78182	4.6188	5.53152	6.04564	5.89159	5.3512
C12orf62|84987	5.94572	7.20973	6.14038	6.3871	6.37215	7.15537	7.64896	6.92268	6.3309	6.53356	6.90347	6.3191	6.69487	7.28727	6.99442	7.19714	7.31609	6.92546	6.74009	6.83051	6.62107	6.98201	6.95434	6.93153	7.11618	6.7816	6.7461	7.04097	6.98741	6.95752	6.61588	7.15091	5.77988	6.25865	6.89583	7.72726	7.13479	6.03529	6.04536	6.18354	6.7256	6.24248	7.30103	6.93448	6.72872	6.54877	6.73253	6.48968	6.6029
U2AF2|11338	5.85939	6.32203	6.4704	6.08343	5.90593	6.87651	6.43259	6.17366	6.15749	6.01237	6.07231	6.16102	6.65013	6.47158	5.65752	6.3787	6.17161	6.48385	6.02379	6.34612	7.48786	5.46382	6.55991	6.79061	6.08128	6.60061	6.14885	5.93619	6.53907	6.52924	5.81519	6.52162	6.61571	5.1995	5.88512	5.92422	6.40568	5.81694	6.58208	6.48334	6.47956	5.76747	6.80361	6.41756	7.00263	6.14532	7.05195	6.20269	6.82806
COX17|10063	7.00619	7.1718	6.68649	6.86502	7.07136	8.49571	8.51385	7.55213	6.79968	8.0472	8.07648	8.40552	7.95109	8.07468	7.73864	7.5666	8.00136	6.68702	7.22651	7.2261	7.40164	7.49099	7.6155	7.47403	8.66825	7.35617	6.9567	7.74773	8.00412	7.83259	7.40741	7.80927	8.0562	7.3559	7.14546	6.98869	7.78852	7.28442	7.9875	7.83804	7.75329	6.66051	7.95729	7.35894	7.49317	6.98696	7.3372	8.19357	7.63136
HADHB|3032	6.56235	7.24302	6.90767	6.86152	7.10014	7.10031	7.3481	6.48562	6.97879	6.85078	7.06361	5.97687	6.88524	7.26369	7.38722	6.68484	6.58654	7.10672	7.703	7.34496	6.83814	6.70687	6.64799	7.42195	6.57563	7.52938	7.88501	6.44399	7.4747	6.40714	6.95967	7.13602	7.48407	7.28866	6.6867	6.64221	6.2249	6.90495	6.31657	6.83927	6.90222	7.10804	6.74488	6.80962	7.51907	7.00332	6.74945	7.01116	6.6813
POMP|51371	6.82173	7.50173	6.79881	7.55424	6.92266	7.29623	7.8218	7.60675	7.18951	7.00425	6.89737	7.22468	7.11369	6.98987	6.9932	7.82546	7.57016	6.42085	6.7318	7.15578	6.89879	7.07729	6.52354	7.5898	7.73726	7.03861	6.80003	6.64463	6.81209	7.97416	7.0697	6.77432	6.66102	7.1202	7.27247	6.02802	7.39115	7.82284	7.35323	6.78155	6.00786	6.90617	7.12722	7.26056	7.34023	6.92207	6.43388	7.21369	7.40269
ATP6AP2|10159	6.78442	7.81418	6.86964	7.71607	7.05681	7.96997	7.72667	7.51452	7.35377	7.45715	7.99317	7.43422	7.44735	6.86801	7.49254	7.68286	7.07288	7.69877	7.65515	7.61231	7.26755	7.38226	7.12238	7.28174	7.45461	7.42348	7.53295	6.79807	7.89374	6.90568	7.73906	7.00826	7.85504	8.24055	8.12913	7.62082	8.05023	7.55396	7.4724	7.7123	8.37146	7.97046	7.08691	6.43768	7.09273	7.98377	7.09879	7.47944	7.06949
HSPD1|3329	7.26463	8.58283	8.08572	8.69908	8.81767	8.68258	9.17678	8.70676	8.47857	8.64375	8.32834	7.59503	7.87876	9.74163	8.70593	7.99808	9.05438	9.40868	8.85286	8.37543	9.4943	8.69863	9.29416	9.37072	7.8425	8.191	9.07093	8.24544	8.80009	8.80679	9.51769	8.33465	8.01963	8.33978	9.08177	9.87217	8.97535	8.39202	8.85518	8.62414	8.15796	8.68505	8.96473	7.68368	8.53724	8.76812	7.82068	7.79871	8.37996
RPL27|6155	10.0579	10.073	11.396	9.78895	10.5296	10.0682	11.932	11.0078	12.1378	10.9703	10.1226	10.2201	10.3606	10.2146	9.9453	11.7498	11.0495	10.6989	9.94858	10.0296	10.9327	10.5933	10.8933	10.3886	10.4166	10.9886	10.4381	10.7755	9.79079	9.92739	10.4713	9.94146	10.2978	9.90378	10.5867	9.01638	10.0429	9.74821	11.8777	10.795	10.7126	10.7665	10.2474	11.0875	10.4398	11.2219	12.1363	11.5453	10.5384
BANF1|8815	7.1154	7.544	6.98807	7.06834	7.34281	7.83166	7.12476	8.11354	8.39218	8.06126	7.56468	8.05601	6.61263	8.3776	6.40769	7.3552	8.09618	7.72893	7.9875	6.67743	8.54749	7.42741	9.57301	8.23485	8.97914	8.20586	8.05056	7.56932	7.57383	7.9094	8.41947	7.40153	7.43071	7.19661	7.73111	7.4401	7.64624	7.72777	8.66338	7.75239	7.97069	7.56397	7.66925	8.09454	7.72105	7.97608	7.65397	7.21385	7.80611
ATP5I|521	8.25775	9.19864	9.01204	8.73104	9.00353	9.1937	10.235	8.88912	8.91922	9.59865	9.45561	10.0929	9.08037	9.54698	10.2001	8.57831	8.20566	9.06471	8.1505	8.15998	9.28802	8.2556	8.6337	9.45661	9.18881	8.79702	7.87496	8.88308	9.91053	8.55893	8.90215	9.62427	8.53064	7.71162	8.14109	8.60698	8.94572	8.59137	8.88333	8.70925	9.48297	8.24173	9.17274	9.73683	8.64072	8.26225	9.28362	9.5882	7.68843
BLOC1S1|2647	6.33551	7.14165	7.24233	6.48067	6.41383	7.64559	6.89495	6.72803	6.72285	7.71759	7.38248	7.15638	7.91513	6.9785	7.72732	7.25321	6.92842	6.70606	6.41256	6.79733	7.32988	7.36677	7.00447	6.79282	7.76913	8.02242	7.15722	7.18662	7.2131	7.28036	6.56056	7.7511	7.18905	5.79517	6.38134	6.64768	7.03465	7.18901	6.58851	7.00282	7.78517	6.38227	6.93828	7.58117	6.14482	7.00414	7.10839	7.70873	6.11832
B2M|567	13.0129	12.688	12.7001	12.9433	12.9284	12.8735	11.8797	12.951	12.6064	12.5698	12.3445	13.3764	13.2298	12.0392	11.0175	11.4794	12.047	11.7607	12.1874	12.3274	11.5092	11.1622	11.0146	10.8261	12.6163	12.8558	11.826	12.8667	12.8133	13.145	13.1837	12.1712	13.0206	12.8264	11.4057	12.823	10.9667	13.6777	11.1368	11.2494	12.0592	12.0969	11.4042	11.9169	11.5691	13.2151	12.6484	12.4825	12.2486
MPRIP|23164	5.72955	6.12128	5.27303	5.61567	5.63646	6.03563	5.09436	5.0861	5.60547	5.21178	5.88622	4.53887	5.9056	5.6243	5.92458	5.64945	5.63007	5.17435	5.82821	6.06124	6.20122	4.81865	5.74649	5.54414	5.52069	5.57551	5.44279	5.43878	5.59045	5.66969	5.17394	5.34701	5.58458	4.97862	5.68749	5.27384	5.14218	6.20088	6.7683	5.20917	5.84075	5.92489	5.9172	6.15449	5.45759	5.74494	5.57377	6.73509	5.3606
TAGLN2|8407	9.96101	9.69772	9.9833	10.8323	9.64385	10.7795	10.7149	10.2877	11.0909	9.49249	11.1629	10.8512	10.0483	10.2751	9.31305	10.6153	9.74995	11.2318	10.8875	10.542	9.91093	10.4298	10.3424	10.3481	10.1425	9.64437	9.9885	10.1827	10.9005	9.93342	10.3341	10.5951	10.4247	9.86909	9.41404	9.79547	9.80238	10.2141	10.1064	10.3576	10.3966	10.7398	9.39946	10.4062	9.89458	10.5673	9.17857	10.4318	10.1892
PABPN1|8106	6.32856	6.75839	6.0496	6.20865	6.28203	6.41858	6.40465	6.3332	6.10222	5.82217	6.15006	6.59128	6.37794	5.69002	5.69148	6.10517	6.80123	6.32077	7.03476	6.36782	6.50816	5.75376	6.41906	5.88066	7.17423	7.17594	6.68719	6.23956	6.26629	6.34668	7.00759	6.67786	7.1437	5.90522	5.87358	6.00721	6.00736	6.27509	7.285	6.31422	6.40822	5.67674	6.59788	6.73494	6.29033	6.76902	6.77035	6.39473	6.47458
NDUFB8|4714	6.03075	7.44565	7.35932	6.45964	6.49397	7.66992	7.36428	7.43682	7.49605	8.16421	7.23585	6.2689	7.70105	8.22612	8.2517	7.11134	7.17057	7.07916	7.60063	7.48439	7.97097	7.18417	7.54479	7.4868	8.30045	7.82774	7.20194	7.5634	7.46411	7.55047	7.30032	7.3658	6.64112	6.72453	6.83465	6.90186	7.08438	7.10489	7.70951	7.33792	7.36444	6.85086	7.88195	7.98396	6.51089	7.24882	8.08678	7.92689	7.34108
SFRS6|6431	6.0978	7.33606	6.01627	6.61178	6.5791	6.76363	6.42453	6.21503	6.04572	5.52204	6.33565	5.42159	6.74387	6.7172	6.37401	6.50291	6.50814	6.47617	5.28992	6.63667	5.69659	6.36931	5.86571	5.77594	6.72846	6.22263	6.96898	5.757	6.37359	6.49878	6.4008	6.14533	6.2043	6.15177	6.35263	6.54741	6.27515	6.46744	6.59744	6.90545	6.20923	6.23849	6.98357	6.14393	6.28544	6.43176	6.44808	6.11082	6.72518
SEPT2|4735	7.70626	8.50052	7.62099	8.10492	8.01006	7.25486	8.53744	6.78553	7.39505	7.06237	8.74644	7.0605	8.65436	7.89741	7.7176	8.3426	8.27609	7.07905	7.40616	8.37773	7.24873	8.07865	7.79229	7.76049	6.97339	7.34556	7.92789	7.57262	8.43489	7.71558	8.05616	7.78106	7.80158	8.00057	7.90814	7.9743	7.77297	8.35743	8.37073	8.00303	8.2451	7.75263	7.96105	7.86454	8.07483	8.06983	8.02166	8.03187	7.42993
PDCD5|9141	6.96808	7.12273	7.11478	7.1787	7.38878	7.05121	7.69773	7.97586	7.31257	7.87968	7.34957	7.62786	6.60633	7.189	7.61218	7.05871	7.31235	7.96153	7.7312	6.06564	7.06572	6.12668	7.47891	7.42487	6.77054	7.78526	7.47624	6.66313	6.67942	6.93804	7.46099	7.0765	8.08606	6.72878	6.96346	6.83098	7.50603	6.81719	7.47309	7.05804	6.89917	7.1601	6.83995	6.59763	6.77703	7.67978	6.8933	6.88006	7.64788
RPSA|3921	8.453	8.11088	9.38475	8.63651	9.10481	8.5907	9.29747	8.6777	9.63812	9.06166	8.12591	8.34245	9.06049	9.07192	8.7954	8.40486	9.71346	8.32302	8.36311	7.37186	10.0419	8.71803	8.39842	8.97666	7.99903	9.11663	8.25437	9.09696	7.88762	9.24498	8.31967	8.09397	7.84613	8.75517	8.49004	8.07306	8.53704	7.46485	8.3745	8.28736	7.93397	9.96867	8.35384	8.56257	7.88842	8.70783	8.63823	8.25485	9.23438
TMEM214|54867	6.507	6.75218	6.33843	6.27579	6.0414	5.87542	6.87143	6.24225	6.14651	5.98776	5.96608	6.39638	6.15138	6.09113	7.55912	6.70968	6.02987	6.23182	7.08323	6.59249	6.41231	6.79578	6.08536	6.28823	5.83979	6.16993	7.13504	6.29593	7.09859	5.86689	6.60611	6.93541	7.21769	6.76421	6.82389	6.57391	6.29114	6.90247	6.12828	6.27305	6.20261	6.72264	6.75863	6.3685	7.28188	6.25445	6.1785	6.23052	6.18398
APEX1|328	6.68717	7.896	7.81047	7.41062	7.78206	7.68455	7.61665	7.94182	7.79405	7.137	7.13104	7.95611	8.06572	7.54578	6.96438	7.71788	7.31044	7.41975	7.60311	7.97713	7.55259	7.68516	7.83769	7.14197	7.248	8.11373	7.7599	7.22641	6.56195	6.73343	8.12094	6.61894	8.36043	7.32443	7.13356	7.02422	7.8017	6.98742	9.34652	7.8426	7.94746	7.91978	7.48708	6.68811	8.02369	7.63373	7.67118	7.30688	7.68789
CCT8|10694	8.14258	7.59982	7.70168	7.23502	8.3072	8.00977	8.55706	8.40689	7.33376	7.47145	8.4308	8.16188	7.86091	8.197	7.9182	6.89772	8.40694	8.14955	8.21689	7.00084	7.75047	8.7939	8.52829	7.40939	7.35172	7.48535	8.38764	7.487	8.20971	8.25089	8.75946	7.00206	8.71128	8.3397	7.16697	9.00884	7.9933	8.12807	8.0517	8.17844	8.12918	8.57764	7.83423	7.71614	8.51249	7.8464	7.50486	8.44123	7.26872
C7orf30|115416	4.76108	4.83174	4.96022	5.15622	4.86865	6.92606	5.47857	5.35432	5.23423	4.96659	5.6062	5.35498	4.95683	5.11843	5.66785	5.26537	5.16186	5.22775	5.81504	5.41455	5.03436	5.36664	5.64301	5.82126	5.25213	5.13682	5.40176	5.65211	5.50292	5.05128	5.11016	5.6939	5.46278	5.1075	5.31665	5.35592	5.19324	5.64567	5.77361	5.48171	5.10453	5.23823	4.96107	5.23605	5.51733	4.97689	5.07677	5.1761	5.51821
TNIP1|10318	5.85024	6.48411	6.34857	6.18113	6.07949	6.18334	6.54468	6.18377	5.59306	6.19683	6.99513	6.46493	6.26822	6.17235	6.01133	5.76326	6.10067	6.78488	6.25786	7.10289	6.49256	6.08738	5.46818	6.27217	6.56337	5.9247	5.8527	6.33198	7.22817	6.82524	6.02053	6.45077	6.54589	6.37385	5.37391	6.53312	6.08655	6.08021	6.20406	6.36899	6.62798	5.92072	6.58388	6.46299	6.11778	6.12334	6.66497	6.19173	7.13612
COPS7A|50813	5.68069	5.94614	5.84403	5.95378	5.60993	6.63445	5.81118	6.39975	6.5906	5.78911	5.78846	5.17764	5.93772	6.73017	6.13567	6.30799	6.87728	6.75285	6.1045	6.67832	6.4211	6.34706	6.29387	6.57931	6.19868	6.46961	6.57424	5.73854	6.28447	5.82072	5.71572	6.00965	6.21152	6.33714	6.02656	5.57634	6.04836	6.21641	6.43868	6.80914	6.62537	5.94563	6.54455	6.34622	5.70273	5.38514	5.84836	6.79486	5.47103
H3F3A|3020	9.78245	8.71852	7.95894	8.75052	8.94527	9.58616	9.15959	9.24844	8.99134	9.43809	9.61406	9.92705	9.85462	8.77568	8.99696	8.20522	9.28844	8.84995	8.07144	8.57714	9.1459	9.44838	8.64718	8.17145	10.1734	10.0706	10.6615	9.24703	9.07896	9.73554	8.59313	9.03222	8.86831	9.71879	8.64948	7.99241	9.01812	9.24154	9.65159	9.40895	9.0325	8.77579	8.40386	9.32017	8.73409	9.57201	9.06488	8.97351	8.62155
PPP2R4|5524	6.99627	8.00336	7.46025	7.65664	6.98774	7.6427	8.8889	7.82151	7.86778	7.72736	7.63474	7.74246	8.68628	7.46461	7.08287	7.49214	7.31503	8.18718	7.06663	7.79028	7.39322	7.28696	7.45664	8.18692	7.16023	7.4713	7.64753	6.86349	7.63859	7.95213	7.44959	8.27452	7.78122	7.12818	6.74931	8.96324	7.57748	7.63379	8.93205	7.66295	8.10238	6.61276	8.40792	8.61816	6.8355	6.94972	7.18745	7.55864	7.79015
RPS5|6193	9.46564	9.92411	10.9146	10.0955	10.6367	10.4584	10.5692	10.3281	11.0031	10.6761	9.90128	9.34396	10.1451	10.8105	10.4788	10.674	10.6493	9.98241	9.37947	9.63491	13.5786	9.98985	11.018	10.3023	9.65165	10.0524	10.4148	10.1307	8.95211	10.813	9.59024	9.78254	9.31705	9.28568	10.016	8.78148	10.4757	8.84926	10.6471	10.6274	9.98004	10.1768	9.91275	10.2133	10.2721	9.85849	10.625	9.96734	10.5423
KIAA0174|9798	6.28654	7.06142	6.05399	6.18833	6.60039	7.44977	6.83403	5.97105	5.94098	6.51987	6.4164	6.05707	6.47452	6.79543	5.93907	6.16695	6.48781	6.48366	6.30797	6.27013	6.67442	6.10564	6.77888	6.05818	6.2437	6.1849	7.66884	6.07898	6.39965	7.00213	6.24684	7.40147	6.65033	7.50056	6.99789	6.76477	6.38179	7.37188	7.18926	7.601	7.25443	6.70268	7.23892	6.59303	6.70692	6.75123	6.36887	6.84259	6.89691
PIGY|84992	5.81052	6.34149	5.97673	7.30989	6.26116	6.5046	6.37074	6.1412	5.46495	6.14507	6.41048	6.51907	6.55966	6.39998	6.83742	5.51637	6.46857	6.65456	6.25665	5.97267	6.59426	6.44487	6.69856	6.56002	5.94144	6.6619	6.53192	6.45966	6.79307	6.47498	6.41266	5.60001	5.95556	7.31329	6.54983	7.07835	5.93941	7.12776	5.43542	6.28593	6.46774	6.58838	6.88522	6.45684	6.62414	6.6345	6.15083	6.22806	6.69557
POLR2G|5436	5.95638	6.94228	6.33661	6.66743	6.91663	6.39262	6.40037	7.41647	6.97324	6.8295	7.05807	6.40136	6.27586	6.27515	5.96126	6.83238	6.66622	6.69996	7.31468	6.92588	7.52597	7.0693	8.89518	7.59719	6.93722	7.51742	6.47062	6.48179	7.07225	6.78449	7.09487	6.42617	6.81973	7.11276	7.19226	6.24578	6.73434	7.01663	8.13855	7.90344	6.61924	7.12129	6.96446	6.90068	7.00295	6.97999	7.09483	6.61287	6.89868
COPE|11316	7.60027	7.74423	7.71379	6.91511	6.77931	7.70501	8.84232	7.89759	7.52903	8.08633	7.56175	7.92307	7.60234	7.21492	8.251	7.21034	7.86468	7.94757	8.02877	8.84358	7.77045	7.40325	6.76955	7.33661	7.34107	7.76915	6.80156	7.90814	7.28542	7.60536	7.12925	9.14819	8.06593	6.48163	7.12397	7.58647	7.84999	7.04471	7.86207	7.40273	7.25727	7.25449	8.30359	8.84766	6.87222	7.51093	7.37847	7.73004	7.58446
VTI1B|10490	6.03653	6.36853	6.08898	6.23394	6.12599	5.7853	6.66756	6.23251	5.94814	6.35954	6.32371	6.87531	6.61947	6.7267	6.65811	6.67822	6.11985	6.05393	6.91444	7.3862	6.45815	6.17851	6.69231	6.88908	7.07329	6.12232	5.94255	6.39577	5.66291	6.21542	6.48599	5.66483	6.00206	5.89245	7.21795	6.10993	6.39199	6.14639	7.27338	5.9028	6.69897	6.04316	6.85443	5.72074	6.17615	6.50322	6.5357	6.15605	5.93904
SRP19|6728	6.03051	6.19356	5.88377	6.05149	6.06611	5.86224	7.42142	6.55636	5.92472	6.32024	6.21865	7.0187	6.4561	6.77321	7.12917	5.89181	6.72196	6.15308	7.08024	6.50103	6.1158	6.57531	6.26806	6.61079	6.4775	7.01107	7.5213	5.75209	6.17645	6.65719	6.65408	6.56348	6.25708	7.06788	6.09508	5.65883	6.53186	6.39531	6.49384	6.37277	6.90982	6.1098	7.52069	6.60993	6.39885	6.79289	6.14137	6.55503	5.65277
NPC2|10577	8.38561	8.48045	7.94027	8.87053	8.33683	7.7332	8.02182	8.58294	9.53286	8.81969	8.68756	9.22708	7.82921	7.6299	8.42344	7.91372	8.77777	8.03089	8.20062	8.38282	8.29213	7.55151	9.01839	7.65721	9.49677	8.50911	8.53279	9.90613	8.4656	8.54292	8.84358	8.24165	8.94076	8.87992	10.1354	8.41352	7.24198	8.30081	8.73412	8.13183	9.1306	8.3029	8.27256	8.46156	9.36396	9.05041	8.45778	8.59132	7.84411
TXNDC12|51060	6.0686	6.58618	6.23393	6.1655	5.96712	5.96295	7.33265	6.74692	6.29712	6.2967	6.69002	6.7608	6.0383	6.39062	5.65045	5.94392	6.02393	6.30014	7.13041	6.54423	6.00504	6.85004	6.77306	6.42576	6.18465	6.59595	6.40419	6.27311	6.88429	6.00614	7.65901	6.25557	7.15671	6.48716	6.43956	6.72721	6.90525	7.26155	7.80425	6.11527	6.49669	6.70405	6.41221	6.38038	6.07684	6.58447	6.48964	6.16529	6.07511
C19orf22|91300	5.99137	6.02807	6.25739	6.09016	6.22237	6.33761	6.70539	6.41628	6.47309	5.90908	6.20053	6.16284	6.30665	6.11603	5.33171	5.94533	5.92756	5.78241	6.50076	5.39463	5.89995	5.3722	5.90312	6.03381	6.18846	5.70157	6.11861	6.11899	6.2593	6.34134	6.31193	6.40321	6.56341	6.13707	6.55377	6.1235	5.41925	5.6292	6.12731	6.75665	5.83608	6.67188	5.95884	7.18351	5.43042	5.91239	6.08117	5.92992	6.50472
CDIPT|10423	5.67912	6.68427	5.5925	5.98476	6.06019	6.89024	6.01114	5.91195	6.17737	6.19331	6.4664	6.14905	6.02443	6.87151	5.95954	6.25381	6.37861	6.67674	6.32534	6.11279	6.20417	5.88472	6.79317	6.25764	6.44834	5.99025	6.36687	5.77313	6.84888	5.68783	6.09155	7.30737	5.79926	5.81257	6.2412	5.72429	6.49047	6.36359	6.58724	6.85047	6.39002	5.90567	5.88999	6.67996	6.3592	5.47921	6.74494	7.00133	6.15459
NSA2|10412	6.85862	7.46944	7.26662	7.11414	7.15719	7.29428	7.47963	7.31972	6.36369	7.22282	7.01124	7.88048	7.42862	7.38704	7.49821	6.64368	6.6489	6.11285	6.82563	6.62727	7.19409	6.86194	6.62138	7.67231	6.63409	7.24911	7.41971	6.35548	6.08307	6.98048	6.95664	6.16936	6.24496	6.48748	6.19376	5.72529	6.33026	6.58542	6.8758	7.3317	7.42619	6.50029	6.84866	6.48881	6.9341	7.10288	7.21926	7.16577	6.44597
RPN2|6185	8.40197	8.98919	8.31913	8.27275	8.09191	8.31243	9.38961	8.60245	7.82127	8.4363	8.36714	7.43893	7.92401	8.53505	9.26585	8.31718	8.24974	9.17549	8.61216	9.07632	9.01996	8.64211	8.20943	7.95574	7.96753	8.21823	8.74008	8.37838	8.48179	8.28938	8.98603	8.08087	9.30724	9.92469	9.7666	9.17361	8.01808	7.87254	8.83718	9.11331	9.27187	8.79774	9.69987	7.78369	8.49963	8.84009	8.18465	8.08465	8.5878
NDUFA8|4702	6.18804	6.85049	6.4586	6.61884	6.21172	5.66032	7.98323	7.28945	7.37563	7.31657	6.9593	7.0222	6.82431	6.84743	6.41759	6.79419	6.99173	6.91802	7.24983	5.94245	6.45778	6.94798	7.01891	7.71526	6.88522	7.31916	7.41892	6.31324	7.07847	7.3156	7.1875	7.43351	6.69228	6.66646	5.92553	7.33867	6.5506	7.08236	8.16813	6.68133	7.24043	6.58626	7.1842	7.34641	6.48718	6.49313	6.58519	6.63163	7.00011
CCT4|10575	7.11503	7.72316	6.95475	7.24167	7.5977	8.09322	8.19282	6.85853	6.96995	7.07623	7.25613	6.36757	7.4494	7.85033	7.71748	7.42284	8.46924	8.0189	7.27385	7.64108	7.70981	8.08257	7.3361	8.00731	6.33667	7.80091	8.63778	6.7334	7.72	7.48214	8.11648	7.46772	8.61467	7.90856	7.12592	8.16729	7.57369	7.42996	7.60423	7.92595	6.99599	7.31477	7.46478	7.32085	8.58315	7.88341	7.13245	7.53113	7.41589
RBM39|9584	6.22796	6.86358	6.4252	6.88796	6.81037	7.92736	6.66089	6.03663	6.06734	6.00429	6.65072	5.82718	7.61509	7.11337	6.23082	7.23117	6.89167	6.76286	6.50082	7.2834	6.78123	6.7153	6.21891	6.83977	7.16798	7.02703	7.06952	6.06021	6.6755	7.07283	7.07628	6.54545	6.84792	7.10619	6.88447	7.52693	6.46033	6.62826	6.38974	7.32667	6.61912	6.85998	6.85455	6.73887	6.68987	7.13366	6.77642	6.72171	6.88254
SEC31A|22872	7.17389	7.47982	7.31786	7.63684	7.33759	7.07687	7.07985	7.09384	6.33038	6.60939	7.34895	7.93552	8.02774	7.1787	7.92277	7.72809	6.93459	7.77226	7.62552	8.12714	7.46408	7.98641	7.56114	7.50187	7.28347	7.67493	7.8234	7.21942	7.10651	7.09814	7.42889	6.82096	7.52626	7.95761	7.37968	8.41483	7.33848	8.26788	6.0045	7.27209	7.91018	7.85543	8.10189	7.48484	7.3576	7.46044	7.02829	7.81542	7.31352
BOLA3|388962	4.96266	6.09514	5.78091	5.2675	5.67738	6.56337	6.80471	6.63516	6.26902	6.50138	5.46182	6.37701	5.15274	6.16395	5.91261	6.12197	6.31966	6.73044	6.91374	6.18503	6.15846	5.8471	6.33468	6.3042	6.37565	6.64728	6.64505	6.23908	6.76663	6.54281	7.08866	5.73837	7.14324	6.66719	5.95144	5.86137	6.03013	5.75064	6.51748	5.95084	5.73448	5.9717	5.91747	6.20957	6.55241	5.92927	5.77959	6.3934	6.10049
HNRNPUL1|11100	7.05873	7.35181	7.04282	6.81252	6.97838	7.40693	7.31919	6.90279	7.41642	6.99617	6.88995	6.54934	7.6321	7.29795	6.86498	7.31421	7.59735	7.48102	7.05212	6.64082	7.22548	6.4355	7.25112	7.11516	6.90309	7.22921	7.58516	5.90539	6.4533	7.64192	6.55849	6.8176	8.01829	7.01737	6.73088	6.74938	7.35992	6.65816	7.348	7.64367	7.27223	6.88895	6.81398	7.16883	6.65378	7.44058	7.47166	6.98839	7.41738
NDUFB5|4711	6.52069	6.86192	6.37659	6.93778	6.97718	6.59987	8.04986	7.85372	7.47835	7.42857	7.21604	6.97016	7.15498	7.11736	6.94951	6.96591	8.36825	6.96965	6.87115	7.17592	6.67212	7.11668	6.37349	7.0474	6.82821	7.72605	6.88846	6.58233	7.41909	6.93074	7.32921	6.84457	6.81866	7.7095	6.61027	6.60488	7.08334	7.66148	8.59151	7.07451	7.00208	6.58423	6.9432	6.62521	7.92131	7.1866	6.97168	6.84337	6.7148
GNAI2|2771	7.43673	7.77486	7.98017	7.52232	7.88887	7.19427	7.61547	7.98505	7.47411	7.92776	8.36115	6.8677	7.50786	7.06422	7.1761	7.62961	8.10018	7.24454	7.80605	7.80126	8.1132	7.42337	7.55057	6.86838	8.07697	7.69742	7.24487	7.5806	7.97902	7.72852	7.78074	8.0682	8.16708	7.838	6.7839	7.57366	6.84657	7.83103	7.78674	7.64926	8.21032	7.31855	7.01154	8.20495	6.2856	7.63708	8.1699	8.23978	7.77655
NUTF2|10204	7.2702	7.62404	6.72211	7.01016	7.14191	8.54619	8.23614	7.72796	7.432	7.46611	7.63104	7.29944	6.79465	7.78426	6.82593	6.95007	7.95398	8.25003	7.53232	7.76441	8.03083	6.76892	7.79762	7.0947	7.72687	7.56984	8.62861	7.19172	7.34342	7.90988	7.64567	8.21948	7.73199	7.92557	7.5566	7.01184	7.12119	8.8066	9.41017	7.66205	8.06126	8.067	7.51689	8.23885	7.54009	7.42529	7.43877	8.01666	7.77344
C17orf49|124944	6.02104	6.80771	5.82368	6.08307	6.11949	6.45539	5.85756	6.65929	6.17487	6.6593	6.75622	6.25837	6.35794	5.99993	5.55804	6.64422	5.67568	5.99605	5.97216	5.96097	6.33364	5.41914	6.45016	5.48723	7.32382	6.73112	6.29239	6.37903	6.97697	5.79589	6.47237	6.51856	7.31862	5.53943	6.46511	6.27155	5.81877	6.36751	6.84414	6.97328	6.42456	6.3318	6.22054	6.68989	5.97133	6.66602	6.42321	7.11159	5.85768
TAX1BP3|30851	6.95267	6.85872	6.82472	7.5339	6.57933	7.50706	7.47882	6.60383	6.94012	6.61227	7.23573	6.11427	7.24267	6.46205	7.45516	6.86044	6.76528	7.00971	7.59323	7.15982	7.4336	6.56018	7.95741	7.02878	7.14178	6.94982	6.95627	7.19035	7.66278	7.40796	6.96446	6.73099	7.38462	6.11803	7.48725	6.86167	6.64585	7.70798	7.12583	7.02832	7.29148	7.47742	8.43018	7.5084	7.65212	6.84005	6.7942	7.84605	7.56642
GNG5|2787	7.42614	8.07321	7.86579	7.59315	7.15956	6.90489	8.05377	8.28348	8.54474	7.91135	8.45819	8.76164	7.55839	7.5531	6.89042	7.33822	7.2321	7.6823	7.98233	7.51391	8.2178	6.91847	8.41281	7.688	8.67687	8.58107	8.28529	8.04018	8.06186	8.07183	8.2315	8.03086	8.32924	8.5984	6.98006	7.85328	7.8099	9.40761	6.95982	7.86764	7.64047	7.5008	7.71355	8.77481	7.59829	7.67139	8.0314	7.11647	7.65693
EIF3K|27335	8.05825	8.19503	8.13767	7.75044	7.95366	7.94915	9.17709	8.25085	9.10749	8.71581	8.67039	8.07967	8.00677	8.38515	9.0455	7.94756	8.67287	8.20511	8.44475	7.21087	8.03472	7.38703	8.2818	8.43063	8.39007	8.07827	8.73626	7.61949	7.55838	9.79003	8.04948	8.49617	8.57099	7.86687	8.18818	8.04319	7.94705	7.39571	8.51747	7.97647	8.29754	8.13947	8.43659	8.37908	9.15056	10.2929	8.45812	8.45471	8.23594
TM2D3|80213	4.86862	4.83118	5.19563	5.415	5.64332	5.7018	4.71661	5.5159	5.51316	5.15944	5.69711	5.6706	5.82145	5.32167	5.09332	5.18871	5.27148	5.36997	4.95188	5.26271	5.32314	5.33108	4.41729	5.55224	5.30978	4.9733	5.60543	5.5621	5.36017	5.25085	5.54832	4.8491	5.30088	6.49805	5.14174	5.05921	5.19717	5.53736	5.11868	5.34639	6.07798	5.1566	5.47125	4.83904	4.81427	5.42477	4.60848	5.4713	5.35608
THOC7|80145	6.43192	5.8282	6.43019	6.43875	6.68397	6.52125	6.03433	6.97288	6.02059	7.03539	6.50653	7.21054	5.98573	5.95405	6.17814	6.24201	7.24332	6.19263	6.63211	5.42202	6.70981	6.70558	5.91823	5.73116	7.55217	6.60668	6.48545	6.53985	6.85727	6.82107	7.08289	5.67033	6.46553	6.84212	6.55411	5.94953	6.50359	6.29949	6.59345	6.25318	5.84466	6.70335	6.48068	5.88327	7.58995	6.86116	5.87472	6.27682	6.46379
RELA|5970	5.60507	6.02568	6.0389	6.15224	6.0377	5.6435	5.4192	5.89721	5.84918	5.5924	5.88009	5.75677	5.31683	5.98762	5.11695	5.82755	5.83652	6.55993	6.37275	5.4502	6.53217	6.12264	7.38335	6.21383	5.58387	5.71156	6.18102	5.67106	5.69428	5.95054	5.81873	5.57804	5.91482	6.07576	6.02591	5.55522	6.03885	6.58142	6.42608	5.80791	6.48352	6.56395	5.88834	6.37098	5.9918	6.05034	6.02315	5.43963	6.34982
MRPL37|51253	5.85281	6.72518	6.56438	6.92	6.25767	6.02185	7.2242	6.37336	6.59691	6.55871	6.98688	6.97959	6.44921	7.50653	6.60658	5.82809	6.4416	6.92824	7.44976	6.70151	6.83351	7.32852	6.9104	7.36301	5.50203	7.26693	6.8689	6.49902	7.47492	6.70498	7.9187	6.67602	7.28754	7.20035	6.19183	7.07121	7.36144	7.56843	7.65807	6.59982	6.63549	7.31306	6.51098	6.56971	6.48608	6.92035	7.21446	5.82251	6.83086
SKP1|6500	7.09828	7.81526	7.53205	7.82791	7.84879	8.8096	8.69579	8.21871	6.96666	7.59902	8.4045	7.77408	8.60766	8.06797	8.19433	7.80738	8.00171	7.4959	7.75741	7.98281	8.24252	7.99977	7.92313	8.58869	7.51954	7.66716	8.42841	6.47173	7.4432	8.01735	7.61247	7.3284	8.12326	7.87804	7.29369	7.2695	8.53823	7.65693	7.15722	8.17248	8.56012	7.37227	7.87719	6.8491	7.73009	8.20883	7.17015	7.98348	7.86725
MATR3|9782	6.98054	7.35102	7.44704	7.34779	7.73786	7.7077	7.54044	6.79622	6.73352	6.8347	7.70919	7.24906	8.39797	7.8297	7.21284	7.58206	7.59235	6.9982	7.34515	7.55669	7.29706	7.5626	7.18472	7.31153	7.00393	7.57719	8.39042	6.58136	7.03497	7.42237	7.38714	6.6234	7.88027	7.91414	7.0137	7.83831	7.58831	7.49161	7.38794	7.75485	7.63923	7.37356	7.21358	7.21072	7.46858	8.19163	7.23833	7.49667	7.19806
YIF1A|10897	6.36909	6.69763	7.08673	6.66085	6.83461	7.27879	6.36428	7.08518	7.79581	6.49026	6.48451	7.55306	5.7455	6.92354	7.07655	6.92881	6.86015	7.26632	7.83748	6.52653	7.40586	7.16769	8.11171	6.63806	7.73764	6.23375	6.74366	6.59724	6.20567	6.58426	6.91568	7.21781	6.29804	6.80252	7.1866	6.7874	7.26052	7.20914	7.87644	7.21518	6.87158	7.61781	6.70736	7.04239	6.69906	6.62635	6.83117	6.67848	7.17924
IK|3550	5.82868	6.63455	6.291	6.00363	6.4299	7.12316	6.72294	6.45633	5.68112	6.16194	6.65145	6.556	6.99359	6.48545	6.59301	6.62916	6.48982	5.71575	6.63654	6.85361	6.6491	6.58724	5.96456	6.96817	7.33959	6.55211	6.62498	5.63175	6.21231	6.40664	6.5558	6.34381	7.65429	6.28529	5.64492	6.44332	6.74134	6.20836	5.85661	6.52855	6.61161	6.10764	6.75771	6.36059	6.3403	6.7903	6.59013	6.98903	6.28085
RPS23|6228	6.88093	7.88077	8.32991	7.58429	8.69164	8.15863	8.32522	8.17079	7.70182	8.15126	7.45126	7.9738	7.94354	8.40339	8.30489	7.66188	8.11753	6.97996	7.82549	6.92635	8.86339	8.32724	8.27755	8.29591	7.86757	8.53692	8.19301	7.90418	6.88894	8.14895	7.89243	7.52283	6.48356	6.51797	7.07844	6.51618	7.28975	7.14517	8.27005	8.64694	8.36965	7.73465	7.84033	8.06831	7.17524	7.82721	7.99274	8.32098	7.47199
TCEB2|6923	7.40351	8.31426	7.96999	7.80799	7.97252	8.44	9.07558	8.45127	8.20601	9.36493	8.32388	8.91018	7.85746	7.57463	8.45371	8.02629	7.30736	8.00492	8.23717	7.81114	8.40863	7.44284	7.13634	7.93151	8.74724	8.29819	8.64776	8.57604	8.61475	8.05688	7.92438	9.25604	8.18453	7.2929	7.39169	7.74923	9.1465	7.59027	7.70642	8.36407	8.30025	7.76226	8.32723	9.16397	8.27361	7.48387	8.41583	9.37462	8.52026
ATP6V0B|533	7.44367	7.75827	8.27436	8.22512	7.37522	7.88084	8.75388	8.25666	7.73533	8.57961	8.83272	9.00609	7.59021	7.74033	8.24164	8.07664	7.39181	6.97749	8.04414	8.15574	8.05371	7.29814	7.55174	7.95362	7.63821	8.03245	8.25362	8.01194	8.81906	7.67847	8.44138	7.67492	7.98074	8.6487	7.20189	8.03153	8.52387	8.50857	8.51991	7.43447	8.18763	7.79509	8.22873	8.25215	6.09594	7.08349	8.60963	7.8127	7.24681
IGBP1|3476	5.58703	5.95351	6.04821	5.77627	5.39094	6.50371	6.526	5.74444	6.10837	5.79228	6.26205	7.31552	6.41305	6.10618	6.73447	6.30804	5.98295	5.20283	6.67555	6.48674	6.08729	6.11972	5.95392	6.32102	6.28324	6.11264	6.23497	6.08182	5.80356	5.60661	5.45141	5.16456	6.10414	5.8467	6.18547	5.90714	5.83714	6.06509	6.92947	6.33102	6.1527	5.99277	6.64062	5.75218	6.21966	5.88115	5.86309	6.18656	6.26754
XRCC5|7520	7.33328	7.64751	7.79557	7.87396	8.05251	7.30539	8.34308	6.71422	7.58633	7.23543	8.36015	7.0456	8.30713	7.92956	7.79494	7.77985	8.40797	8.35323	7.29535	7.95527	7.297	8.14544	7.95234	8.42588	7.39336	7.66551	8.45735	7.25776	7.99517	7.75184	8.12003	7.28526	7.68741	7.55631	7.53804	7.82935	8.11905	8.53633	8.17823	7.89024	7.63448	8.20521	7.97975	7.61653	7.9013	8.08557	7.58598	7.60784	7.6629
CTNNBL1|56259	4.83815	5.84143	5.32622	5.32254	5.68628	5.56228	5.49588	6.11337	5.5878	5.59875	5.17642	4.48987	5.37572	5.73364	5.48639	5.6917	5.96465	5.84182	5.4878	5.80119	4.87101	5.31537	5.18959	5.10499	6.39618	5.58807	5.69435	5.86714	6.00663	5.06586	6.18463	5.47193	6.39612	4.80129	6.14897	5.58427	4.75163	5.3576	5.94177	6.23075	5.37318	5.47163	5.29006	5.56576	6.47577	5.61147	5.67631	5.58409	5.50566
EBNA1BP2|10969	5.81436	6.52023	7.13322	6.06592	6.10143	6.3974	6.89803	5.98168	6.10119	6.1121	6.81519	6.67702	6.42939	7.06775	6.12559	7.36174	6.21143	6.25303	6.78581	6.5213	7.01746	5.75265	6.20294	6.9369	5.90324	6.80261	5.57947	5.97575	6.32224	5.93544	7.64554	6.32102	6.73526	6.01115	5.52464	6.24241	7.05894	7.01913	7.59757	6.32497	6.16824	6.88219	6.46682	6.39162	6.25822	6.41951	6.30153	6.38554	6.08563
GABARAPL2|11345	6.77763	6.97738	6.01221	6.45251	6.62327	7.66096	7.43387	6.11044	6.13154	6.63178	7.20227	6.45063	6.71051	7.15016	6.64865	6.78845	7.03881	6.18106	6.66393	7.17871	6.90725	6.47158	6.75659	6.60132	6.74839	6.60362	7.59454	6.40106	7.1554	7.1378	6.46653	7.61739	6.35386	7.42673	7.48017	6.41107	6.30084	7.52192	7.04408	6.63907	7.28556	7.06303	7.41125	7.12796	6.48165	7.06551	6.85226	7.62465	6.82133
ANP32B|10541	6.67793	7.4255	7.2013	7.28581	7.33411	6.34368	8.19405	7.28674	7.38791	7.20116	7.04273	8.01278	7.71564	7.6727	7.25933	7.23601	8.0314	7.04283	6.9474	6.57573	7.44663	7.37731	7.43314	7.0173	7.10305	8.26375	7.21708	6.40543	7.64737	8.05918	7.23478	7.5542	7.41887	6.70763	5.99375	7.46664	7.85318	7.84528	7.78535	7.55615	7.61375	6.97687	6.09269	7.08246	7.6595	7.73262	7.71858	7.10902	7.15959
SNRPB2|6629	5.66871	6.5972	5.88776	6.18616	6.6151	5.88306	6.06023	7.10548	6.34188	6.87728	6.43756	6.52459	6.33548	5.81445	6.59362	6.53226	6.54323	6.8897	7.05676	6.86749	6.30367	6.51989	6.40298	6.9496	6.99079	7.10038	7.36048	5.93008	6.44491	6.42285	7.32872	6.28733	7.0715	6.79168	6.66519	7.0416	6.10318	7.30065	6.1093	7.5322	7.13736	6.43492	6.30292	6.93409	6.25395	7.22063	5.66883	6.50159	6.81654
OBFC2B|79035	5.06117	6.1402	5.46697	5.21527	5.70556	5.45142	6.24229	5.606	5.47972	5.40596	5.55794	5.63753	6.00766	5.11389	5.26249	5.91941	5.08878	5.78692	6.0982	5.49144	5.62276	6.44909	5.7963	5.69167	5.63628	6.47662	5.2354	5.4393	5.51835	5.26782	6.12045	6.08507	6.23449	4.92863	5.3918	5.49471	6.51932	5.91531	5.2512	6.17577	5.48612	5.47426	5.32823	6.48069	5.27725	5.43801	5.61771	5.92361	4.59374
CTDSP1|58190	6.01737	7.28664	6.94034	6.46481	6.62508	6.46907	7.08213	5.79434	6.48542	6.33698	7.45728	6.39836	7.64808	7.25842	7.1455	7.16044	6.68749	6.20762	6.34258	7.10391	6.29096	6.85541	7.03716	7.12743	7.14032	6.13413	6.60182	6.67723	7.48288	7.01491	6.1254	7.15451	6.6655	5.65552	6.29783	7.07858	6.05837	7.18488	6.96226	6.96417	7.34361	6.5359	7.09052	7.7588	6.64684	6.66492	7.06396	6.91154	6.94931
USF2|7392	6.43449	6.80647	6.51128	6.53217	6.30825	6.8479	6.77878	6.90982	7.10175	6.69087	6.81189	6.41808	6.83682	6.34302	6.66308	6.58689	6.40367	6.94827	6.58177	6.16711	6.72385	5.31561	6.69993	6.59199	6.28819	6.64157	6.48436	6.70603	6.70485	7.56859	6.03823	6.83848	6.87304	4.98772	5.84495	6.20289	6.81079	6.52994	6.15057	6.23002	7.46484	5.83932	6.87509	6.40038	6.56758	6.75333	6.97556	6.60574	7.21523
RPS19|6223	10.0312	9.80183	11.1083	9.83757	10.4707	9.95217	10.6157	10.8594	11.7082	11.425	9.98736	10.255	9.98784	9.9828	10.4135	10.6568	10.8478	9.91024	9.72563	9.01836	10.6996	9.63314	11.0305	10.145	10.0875	10.681	10.3751	10.4522	8.91257	12.2596	9.88604	10.3325	10.0109	8.92118	9.58294	9.27386	10.3635	9.30294	10.5509	10.7255	10.1816	9.93876	10.1634	11.1056	9.00839	10.0005	11.3297	9.98434	10.9048
TAF10|6881	6.22486	6.16144	7.10433	5.96074	6.65082	6.60176	6.06614	7.8027	6.26371	6.90669	6.99352	6.98301	6.47571	6.62404	5.69316	6.81564	6.51481	5.86258	6.59763	6.04171	6.67252	6.91025	6.54703	6.85374	7.31876	7.12416	6.49258	6.5723	6.61646	6.63044	6.75583	7.32789	6.55826	6.7243	6.83693	6.48306	6.88747	7.40959	6.58168	7.40309	6.3849	6.69	6.95347	6.44561	5.96029	6.56822	7.1009	6.77148	6.36491
HNRNPH1|3187	6.65411	7.51908	7.3076	7.58695	8.09972	7.5191	7.82288	6.40771	6.82665	6.60894	7.69172	7.2261	8.03453	7.80242	6.69559	6.85008	7.46951	7.67977	7.25266	6.79386	7.22234	6.80473	6.7927	7.2	6.68835	7.6905	7.79775	6.18592	7.11743	7.70507	7.00333	7.25675	7.80678	7.52179	6.86218	7.75606	7.60115	8.18378	7.75277	8.0086	7.02886	6.71724	7.01601	7.05967	7.17659	8.48001	6.87604	6.92132	7.55553
OTUD5|55593	5.06001	5.38028	5.37302	5.40288	4.79809	6.10013	5.55184	5.00606	5.13543	4.64488	5.40018	5.69477	5.70072	5.53214	5.11463	5.32514	5.71317	5.12634	6.14863	6.28676	5.39516	5.05556	4.72663	5.79957	5.16531	5.62905	5.53794	4.93423	5.19459	5.12212	5.21596	5.5955	6.00171	4.79694	5.29583	5.66624	5.63229	5.66573	4.77779	5.694	5.66511	5.52182	5.34467	5.34562	4.45873	5.15992	5.44847	5.71561	5.31488
TXN2|25828	6.03821	6.1108	6.60828	6.77978	6.53618	6.94187	7.41152	6.68533	6.97043	6.43563	6.58104	6.64897	6.78944	7.3759	7.46206	6.59308	6.9503	6.38845	6.88883	6.60594	6.74089	6.91505	7.15101	7.27002	6.29054	7.31842	6.83644	6.8145	7.10794	6.40759	6.749	6.33808	6.18955	6.64343	6.21047	6.18903	6.65203	6.08389	6.79649	6.35751	8.78129	6.6078	7.38995	6.22944	6.35003	5.87856	7.01709	6.51779	5.94964
FAM96A|84191	5.35172	5.49551	5.56577	6.54088	6.44052	6.42619	5.89445	5.52286	5.64891	5.64044	5.95435	6.43827	6.05946	6.51963	6.01561	5.96101	5.8421	6.11936	6.3169	6.11827	5.91525	5.97683	5.30565	6.22562	5.85194	6.02474	6.20293	6.64611	6.93073	6.60523	6.27301	5.80139	5.83008	6.96001	5.75905	5.98932	6.51791	6.52072	5.2656	6.09468	5.48356	5.61155	6.04598	6.28287	5.63926	6.08745	5.83226	6.02406	5.90514
EIF2B1|1967	5.35813	5.08704	5.68629	5.38777	6.02313	5.90067	6.00583	5.60622	5.76538	5.33314	6.13568	5.19802	5.82626	6.33463	5.39604	5.08735	6.17049	5.79042	6.21938	5.71468	5.51668	5.34903	5.10157	6.20486	5.47536	6.13333	6.30189	5.46741	5.75367	5.4873	5.40598	5.85384	6.11038	6.01676	5.62695	5.56526	5.13746	6.32503	5.26644	6.03127	5.80029	5.90979	6.54609	5.65753	5.68005	5.97172	5.65216	6.13731	5.33154
BAT3|7917	6.37142	6.7424	6.67995	6.72114	6.44181	7.24946	6.87796	6.20046	6.1202	6.46444	6.59933	6.33562	6.96008	7.07965	7.18421	6.52708	6.64394	6.50591	6.35669	7.59492	6.45199	6.87261	6.51582	6.63586	6.29103	6.6435	7.05019	6.11115	7.25101	6.26209	6.24304	7.39518	7.29149	6.50128	5.92057	7.35059	7.03954	7.12776	6.71477	6.71535	6.68926	7.21924	6.80305	7.2326	6.42381	6.58901	6.71589	6.73874	6.37319
NHP2|55651	6.30022	7.15766	7.35708	7.66487	7.31629	7.52847	7.45445	7.79356	7.78064	7.4515	7.57271	7.44024	7.17321	7.62575	8.00672	6.14161	7.17696	6.60409	7.40896	6.90356	8.14429	7.00177	7.5564	7.84956	7.22507	7.21178	7.47125	6.57192	7.15299	7.10737	7.04484	7.28665	7.45234	5.80139	7.1074	6.97403	7.16927	8.59886	7.1656	7.16532	7.42976	6.59576	7.06746	7.66562	7.30175	7.53209	7.80197	7.31618	6.96687
SUMO2|6613	7.32945	8.01061	8.27361	7.69375	8.40101	8.79376	8.48761	7.56477	8.25898	9.0692	8.56522	7.98581	8.41762	8.81877	7.06019	7.48639	8.7066	8.49553	7.40386	8.30987	8.45308	7.53419	9.30206	8.86024	8.1116	9.61126	8.99613	8.17935	8.17077	9.12464	8.32274	7.56343	8.57306	7.93156	7.78506	8.00255	7.7161	9.74391	9.0672	8.43947	7.72121	7.81266	7.98064	8.42556	9.30744	8.71175	8.02517	8.34836	8.41592
UBTF|7343	5.40712	5.86398	5.65525	5.17665	5.69934	5.99534	5.42987	5.01363	5.58155	4.8335	6.05662	5.07339	6.42874	5.62996	5.14856	5.91204	5.42609	5.43074	5.81451	5.78091	5.98599	5.38966	5.63414	5.44856	5.50148	6.02517	5.58407	5.01544	6.00659	5.42804	5.18758	5.32039	5.82814	5.02106	5.49533	5.57713	5.57407	5.89829	5.87592	5.81467	5.81417	5.14723	5.73043	5.53977	6.47746	6.19577	5.94473	5.90133	5.39479
FKBP8|23770	7.80537	7.30862	7.37166	6.79037	6.57277	8.43602	7.70377	7.61109	7.07605	7.79286	7.11523	6.88876	7.59756	6.70296	7.86631	7.12262	7.26558	7.9875	7.58331	8.08235	7.60683	7.07284	7.0094	7.25574	7.15785	6.98695	6.09307	7.52476	7.31153	6.48421	6.56842	7.95669	8.07278	6.3114	7.19727	6.82529	7.3632	7.09399	7.21919	7.54758	7.24606	6.69837	7.47432	8.75753	7.48678	6.96678	7.47719	8.35362	7.46126
PSMA7|5688	7.388	10.5523	7.77633	8.31423	9.91403	9.3313	9.34972	8.10221	8.09984	8.76989	7.38998	9.24194	8.02353	8.19784	8.24676	7.35822	8.26948	9.25777	9.76942	8.58907	9.36917	7.95606	8.88589	8.46954	8.57185	8.57806	8.34061	7.91079	9.72519	8.8536	8.62457	8.32856	8.97944	7.58093	7.96726	8.58586	8.45601	8.52361	9.2002	8.69085	8.09166	8.02041	8.22717	8.3128	9.02839	8.27707	7.74669	8.37599	9.09686
ARPC1A|10552	6.492	6.9383	7.26399	7.07966	7.03593	7.07553	7.95222	6.96944	7.24835	6.87679	7.08076	7.52389	7.1098	6.90343	7.61088	6.34561	7.29272	6.45414	7.51474	7.45884	7.08968	7.57107	7.49725	6.89273	6.11847	7.77347	7.26816	6.62564	8.29138	7.2169	7.13426	7.14013	7.58891	7.6584	7.76997	8.28944	7.75765	7.08308	6.81398	7.17875	6.95386	7.32217	6.04989	7.43266	6.67141	7.14346	6.56505	7.04394	6.80377
PHB2|11331	6.14986	7.45977	7.80905	7.53342	7.26759	7.86977	7.99925	7.78653	8.43201	7.53751	7.33027	7.12082	7.53089	8.69431	7.89736	7.22081	8.08823	8.00422	8.09357	7.56903	8.13267	7.63596	8.00815	8.80541	7.44726	8.33076	8.23907	7.75192	6.12364	7.38466	7.69509	7.25955	8.13892	7.41169	6.93963	7.02645	7.80356	7.18926	8.41884	8.20842	7.95899	7.55127	8.167	7.56088	7.23555	7.4527	8.35183	7.69489	7.02774
SETD2|29072	5.30318	4.76881	5.11131	5.24928	5.45874	5.50559	5.13817	5.42922	4.77569	4.58819	5.3863	5.60737	5.34073	5.81165	4.62464	5.38638	5.69001	5.02132	5.04514	4.84685	5.28274	5.36017	4.72546	5.02011	5.70592	4.93123	5.18136	5.02537	5.65953	5.40213	5.14948	4.91017	5.47759	5.28656	5.2397	5.27314	5.10177	5.31098	5.29629	5.51915	4.90015	5.54203	5.32688	4.92622	5.00681	5.85993	5.21438	4.98925	5.78855
TMEM203|94107	5.07531	5.36107	5.42404	5.42052	5.74191	6.46642	5.94675	5.81561	6.20545	5.6331	5.23333	5.90807	5.58512	6.39858	4.77693	5.57138	5.06168	5.99035	5.41406	5.3428	5.32046	5.70424	5.68767	5.76238	5.51941	5.93625	6.14489	4.66016	6.193	5.50897	5.95822	6.20134	5.73725	5.84989	5.11055	5.46425	5.81906	5.9211	5.2767	5.90571	5.77286	5.20445	5.26426	6.18985	5.72118	5.41846	5.51611	5.46147	5.58288
YWHAB|7529	7.52452	8.31505	7.83411	8.33176	7.89564	8.6305	8.42616	7.72084	7.77301	7.68062	8.28732	6.49398	8.20538	7.58622	8.09257	7.79804	7.77347	8.13197	7.60518	8.51792	7.00828	8.14298	7.53619	8.13974	7.88723	7.98378	8.32105	6.96423	7.8941	7.88574	8.25431	7.24555	8.42544	8.39059	8.57218	8.35434	8.29172	8.43368	8.33601	8.90574	8.01742	8.20822	7.73797	7.19813	9.37579	7.90478	7.43394	7.72419	7.81664
EIF6|3692	6.70083	7.13245	7.09853	7.5913	7.39384	10.5757	8.12467	7.71138	7.66619	7.33794	6.88542	7.01882	7.57609	7.63143	8.20772	7.29721	7.00302	7.67168	7.57696	7.79361	8.85856	7.38824	7.96537	8.14643	8.35422	7.97918	7.34527	7.22624	7.53597	7.29876	7.88531	7.43507	7.69907	6.46901	7.46824	7.45319	7.11127	6.58472	7.15036	7.90712	7.23559	7.80289	7.6542	7.97198	7.77245	7.06629	7.37679	7.57654	7.57472
GGCT|79017	8.5032	8.87229	7.95083	8.21747	7.58168	8.66688	8.3145	8.11234	7.99135	8.61914	8.72872	8.47538	7.26231	7.70839	8.63428	8.75677	8.29576	8.42286	9.11356	8.31731	7.30773	8.41676	8.22733	8.83269	8.0035	9.38668	9.44355	8.58684	8.81713	8.21895	9.12362	8.14368	8.16543	8.5581	8.76153	8.80414	8.40863	7.41693	8.80581	8.34679	8.74253	7.57522	9.538	9.79412	8.54424	7.87619	8.41572	7.65418	7.76188
CALM3|808	7.04116	7.68417	7.25147	7.52853	7.00247	7.48565	8.09966	7.39446	8.12751	7.72735	7.92806	6.69164	7.44784	7.98844	6.44266	7.59741	7.46633	7.61006	6.80737	6.46045	7.86805	6.37443	7.96398	7.17674	7.09669	7.52739	7.34965	6.63462	7.14377	8.88839	6.77027	6.61723	6.89303	7.07045	6.89688	7.30154	7.57561	7.32335	7.35312	7.90711	7.53046	6.9593	7.60751	7.35839	6.81169	7.30676	7.77677	6.97116	7.44828
UNC50|25972	4.87628	5.17639	5.10257	5.51879	5.5035	5.89746	5.68515	5.01545	5.52408	5.18136	5.1813	4.86357	5.93944	5.42987	5.69563	5.48085	5.65007	5.67426	5.47	5.63337	5.12872	5.6593	5.21374	5.82253	4.99287	6.52781	5.10318	5.3615	6.35105	5.05653	5.98425	5.89246	5.79968	5.7212	5.98076	5.66884	5.2047	6.24548	5.61394	5.11874	5.4248	5.38901	5.55285	5.76089	5.59668	5.58909	5.31367	5.53899	4.97258
C12orf44|60673	5.52257	6.65394	5.6662	5.5013	5.03384	6.28152	6.56035	5.98172	5.80765	5.45054	6.12505	6.50984	5.6393	5.7475	6.1642	6.13582	6.02899	6.005	6.72507	6.06836	5.76215	6.79742	6.31869	5.96131	5.59437	6.23782	6.10548	6.33841	5.60758	5.56322	5.63928	6.80297	5.69308	5.1341	5.55542	6.70055	6.18461	5.71066	5.90133	5.99146	6.60146	5.47846	6.21987	6.38811	6.03409	5.65375	6.11228	6.37496	5.38022
LSM10|84967	5.30948	5.72297	5.0381	5.56624	5.21829	5.48577	6.03117	6.13397	5.2742	6.21633	5.83503	5.91584	5.4922	5.75015	5.25117	6.10058	5.2334	5.16506	6.09242	5.8074	5.6635	4.74102	5.63959	6.26141	5.3603	6.07888	5.50271	5.85796	5.86454	5.77378	6.21205	5.98201	6.1728	5.77897	5.02722	5.40704	5.96256	6.15483	6.20926	5.29165	5.93366	5.80254	6.06857	6.51678	4.43262	5.43912	6.36165	6.05126	5.69985
CALM1|801	6.96634	7.40431	6.64061	7.40634	7.32424	5.95608	7.84851	6.82994	7.07927	7.14685	7.56438	7.37107	7.27944	7.38081	7.56648	7.18627	7.19077	6.99704	8.24369	6.96755	7.32064	6.93692	7.53209	7.48867	7.98778	8.25527	8.01886	6.85186	6.77984	7.20749	7.01902	6.74526	7.22169	7.49793	7.68477	7.18443	7.58547	7.16878	7.68992	6.88529	8.13085	7.63889	7.31349	6.84689	7.12612	7.64855	7.395	8.02284	6.05027
MAX|4149	5.5323	6.42753	5.68185	5.89529	5.80904	4.85566	6.11491	6.03549	5.20672	5.58404	5.65131	6.72392	6.03121	5.78505	6.09868	5.83399	5.7984	5.14603	6.71707	5.76657	5.83205	5.81606	6.32763	5.71362	6.38237	5.88849	6.55932	5.92758	5.6583	5.9896	6.25599	5.51512	5.73134	6.53945	5.74145	5.97497	5.45509	5.8366	6.01393	5.60228	6.15983	5.59108	5.7138	5.25848	5.53464	6.55521	6.12691	5.87749	5.28402
MPV17|4358	5.96172	6.12098	5.90287	5.85618	6.40374	6.45074	6.32935	6.84138	6.02751	6.71131	6.34437	5.56022	5.83559	6.11506	6.62621	6.84492	6.20664	5.88273	6.50735	6.47732	6.29279	6.49379	5.93655	6.34975	6.70897	6.59643	6.37402	6.37591	7.88928	5.50251	6.7509	6.39887	6.12256	6.84067	6.4664	5.72853	5.47396	6.90749	6.62467	6.33564	6.48567	6.2718	6.69757	6.84927	6.72019	5.7451	6.08873	6.68918	6.32201
RPL17|6139	8.41284	9.77269	10.3323	9.13362	10.5111	10.0262	9.05753	9.45095	9.22923	9.0758	9.67062	9.40452	9.5559	10.3024	9.32849	9.49093	10.3403	9.71079	7.97339	9.06006	10.6542	9.35597	9.28297	10.2914	8.76249	10.613	9.87243	9.28065	7.37128	9.06465	9.33845	8.86061	8.21167	9.00303	9.46535	8.50215	9.39537	9.07026	9.18844	10.3301	8.61354	9.81627	9.45638	8.94602	8.38605	9.59033	9.41669	9.81482	8.81459
SYF2|25949	5.19545	5.78297	4.84898	5.68677	5.46739	5.18505	6.14273	5.82187	4.99376	5.4303	5.85794	5.82408	5.65609	5.03428	5.02716	5.3037	6.05155	5.03985	5.35761	5.80841	5.62859	5.16139	4.90562	5.87625	5.74392	5.92755	5.50285	5.30802	5.42513	5.6884	5.50331	5.92603	5.38863	4.86502	4.97446	4.9934	5.01947	5.61982	5.75574	5.49035	5.83926	5.58147	5.55112	5.8701	5.4393	6.02015	4.99669	5.70002	5.09557
DAZAP2|9802	7.63332	8.46073	7.78283	7.99494	8.11086	8.61236	8.55342	7.9206	7.12627	7.59185	8.04114	7.32497	8.46116	8.66967	7.29857	8.34879	8.37797	8.05492	7.51633	8.05341	7.83537	8.25297	7.78378	7.71383	8.20811	7.79441	7.75783	7.6498	7.70933	8.17002	7.82538	7.45044	7.82968	8.58383	8.3484	7.65924	7.90769	7.77837	7.68732	8.54294	8.59864	7.84547	8.07013	7.28677	7.97602	8.14796	7.93734	7.86297	7.02127
PSMD14|10213	6.08158	6.67787	6.02341	6.97833	6.14538	6.66086	7.55233	6.65724	6.68556	6.32815	6.55565	6.52959	6.87606	6.90462	6.80522	5.92438	6.93989	6.76761	6.17474	6.85316	5.81699	6.44602	6.4014	7.91366	6.13969	6.43878	6.50156	6.49627	7.43461	7.03574	7.09941	6.43473	6.39348	6.87627	6.2264	6.84786	6.50213	7.1312	6.80599	6.10708	6.12479	6.64288	6.73089	6.92637	7.18837	6.51757	5.94504	6.59035	6.72602
SNW1|22938	5.40339	6.09341	5.94436	6.09899	6.1916	5.19451	6.12745	6.2487	6.16234	5.47311	5.66183	6.32164	6.5757	6.22256	5.69754	6.64388	5.79911	5.74889	6.18817	5.48571	5.91983	6.10679	5.84318	6.49669	6.26163	6.26209	5.97145	5.6241	6.20338	6.07811	6.03015	5.39315	6.38877	5.71679	6.00971	6.00655	6.33438	6.14294	6.44767	6.08411	6.24667	6.14721	5.78358	5.17343	6.40041	6.53901	6.05581	5.93761	5.456
OS9|10956	7.49917	9.92736	7.62925	7.16793	7.20868	7.95336	8.32946	7.51058	7.34269	7.42025	8.08877	7.0747	8.1774	7.81952	8.20365	7.7036	7.44625	8.01422	7.65899	7.80497	7.41491	7.37588	8.1233	7.43756	7.43439	7.14282	7.0603	7.77768	7.13992	7.16306	7.4839	8.04206	8.57924	7.50819	7.65375	7.78048	7.3123	8.07574	7.75212	7.57157	8.51542	7.18647	8.4905	8.00176	7.68035	7.54003	7.9045	8.0925	9.91737
FIBP|9158	5.44432	6.01883	5.97059	5.76549	5.84403	5.52097	5.33561	6.33249	5.74356	5.83261	6.34416	5.85632	5.76173	6.68385	5.7152	6.29841	6.32233	6.39127	6.44155	5.60952	7.12835	6.47527	7.74355	6.19641	6.66015	6.06207	5.99495	5.61021	5.90332	5.95434	6.40618	5.76017	5.89111	5.6793	5.54933	5.5366	6.39361	6.14868	6.75684	6.39134	6.45956	6.35937	5.89186	6.38434	6.00571	5.80175	6.43748	5.94035	5.57836
C20orf24|55969	6.14228	7.17386	6.32428	7.84865	6.67885	7.15678	8.27494	7.62444	7.08237	7.43064	7.64424	7.47178	6.54498	7.00861	8.03044	6.35065	7.56544	7.26405	7.86818	7.96869	7.52365	7.3972	7.04261	7.53422	7.08679	7.30262	7.13971	7.82537	8.19887	7.4571	7.9658	6.87532	7.56465	7.1837	8.35589	7.98741	7.28173	6.74217	8.26122	7.88631	7.2075	7.0353	6.89674	6.97551	8.15035	7.10279	7.21739	6.8137	7.59983
AP1M1|8907	5.03111	5.41417	5.19022	5.14937	4.82797	4.63323	5.57776	5.1945	5.32078	5.15245	5.19784	4.15079	5.35861	4.70967	4.91755	5.30582	4.69474	5.76206	5.78517	5.69516	5.24108	5.39973	4.7674	5.09302	4.72559	5.23553	4.73991	5.14165	4.7821	5.00348	5.29568	5.43941	5.3302	4.83619	5.21109	5.27521	5.50645	5.19908	5.44017	5.42169	4.86303	4.64129	5.21346	6.12753	5.82084	5.70791	5.23406	5.64562	5.11495
YBX1|4904	7.68523	8.46579	9.08424	8.61797	8.26278	8.13691	9.17613	8.55391	8.70037	9.56997	8.91472	9.26707	7.67897	8.61626	7.58042	8.91814	7.95533	8.27668	9.15659	8.06602	9.44853	7.75111	9.25653	8.68332	7.84104	9.17719	8.48452	8.35214	7.78492	8.23732	9.549	8.29435	9.14705	8.24738	7.29102	8.53307	9.95423	8.0224	9.15078	7.84994	8.0532	8.79642	8.21127	8.45881	7.83845	8.63651	8.71462	8.68335	7.88552
ARPC5|10092	7.53893	7.41405	7.09252	8.03706	7.45105	8.38336	8.14126	7.46152	7.06392	7.52727	7.78678	8.09048	8.09698	7.18907	7.15402	7.34386	8.00435	7.93033	7.27373	8.11774	6.92814	7.56986	7.13904	6.94283	7.35314	7.60094	7.56458	7.35172	8.52881	7.44717	7.22974	6.8145	8.70981	7.54064	7.93441	7.05713	7.40051	8.23364	6.71119	7.96703	6.99296	7.63246	7.27394	8.79393	7.76569	7.48767	7.0494	7.90306	6.94497
NOP56|10528	6.2925	6.49539	6.6618	6.9107	8.02463	6.84449	6.0896	7.29152	6.21497	6.3086	6.2562	6.64956	6.97961	6.84113	6.30973	6.86985	6.89027	6.52282	7.2108	6.80083	7.03077	7.24524	6.92405	7.14967	6.91318	7.56262	6.79243	6.3199	6.52738	6.59328	7.74944	6.1879	7.19815	5.94707	6.75366	7.17135	6.77826	6.54097	7.00268	7.44049	6.15373	7.50316	6.51236	5.85698	6.42201	6.85687	6.34903	5.79925	6.91357
ATP6AP1|537	7.42462	7.43365	7.27808	7.79879	7.09579	8.27195	8.69381	7.42814	6.69354	8.36501	8.58071	7.96166	7.83601	7.57744	8.1334	7.52849	7.06259	8.08747	8.46457	8.79616	7.44359	7.58204	7.36651	7.87267	7.9576	7.41168	8.48433	7.70951	8.48286	7.1615	8.08456	7.29811	7.42914	8.17417	8.4047	7.93585	6.85432	8.00361	7.53195	7.80389	8.98499	7.64946	8.15177	8.24953	6.84756	8.0889	7.97138	7.78268	7.56796
MRPL14|64928	6.19903	6.42027	6.43442	6.56276	6.13559	6.84041	6.85371	6.82555	6.97269	7.17694	6.58675	7.06935	6.5903	7.00889	7.03691	6.74618	6.24035	6.73718	6.76616	5.86058	6.63701	6.52246	7.08172	6.76529	7.09926	6.92774	6.47614	7.08484	6.31342	6.76934	6.68423	6.76385	7.39135	5.53775	5.68745	6.82	6.96333	6.87137	6.35967	6.71474	6.85736	7.09826	6.10683	6.77623	6.33646	6.46261	7.18761	7.02639	7.0282
HMGB1|3146	7.26168	7.52873	6.74698	7.2793	7.46671	7.38454	7.65367	6.71199	7.33239	6.86603	6.83255	7.13282	7.82982	7.69151	6.83696	8.41148	7.68074	6.79173	6.69397	6.91358	7.42625	6.90939	6.64851	7.70023	8.0529	7.72145	8.01053	6.80336	7.30636	8.12424	7.30301	6.91299	7.10185	6.43062	7.31143	6.42137	7.26997	7.80596	7.79708	7.49775	6.44213	7.33377	6.72618	7.15482	7.82218	8.21504	7.11343	7.48925	6.80912
EIF2S2|8894	5.48146	6.38035	5.7533	6.25771	6.2155	5.98737	6.63657	5.11082	5.52551	5.43291	5.5749	5.11201	6.06978	6.2304	6.18248	5.97226	6.15816	6.76231	6.55768	6.25972	6.40271	6.13092	6.6388	6.65845	5.84662	6.34929	6.44794	5.84799	6.24446	6.24759	6.61245	5.95738	6.25544	6.15235	6.90884	6.98701	5.93836	5.9334	5.50785	6.76223	6.05529	6.69446	6.64162	5.78738	6.78312	6.16833	5.40854	5.9941	6.09197
LAMP1|3916	7.7636	7.56327	7.59784	8.37909	7.63135	8.13468	7.93804	7.7712	8.43898	7.58272	8.105	7.00702	7.62821	7.23895	7.67695	7.63381	8.16658	8.39098	7.74992	8.27534	8.15423	7.92784	7.41415	7.74457	7.96928	7.51078	7.83922	7.26741	8.3744	8.13444	7.30021	7.78947	7.86809	7.32905	9.21128	6.91999	8.23536	8.90499	8.44156	8.35393	7.66601	7.74715	8.14153	8.09428	8.11468	8.49107	7.02594	8.48944	7.79564
ERP29|10961	7.24071	6.92869	7.38399	7.25877	6.2333	7.58531	8.11175	6.44843	7.74077	7.5163	7.59413	7.79245	7.64597	7.76019	7.49698	7.18674	7.47893	7.48048	8.00759	7.76563	7.59224	6.93831	7.11709	7.49982	7.75758	7.64334	6.73185	7.56681	7.51978	7.50772	7.58993	7.99607	8.12736	6.55134	7.07465	8.61313	7.00602	8.01769	7.82619	7.4322	8.42341	6.85474	8.78214	7.73418	7.78267	7.05878	7.66702	7.67413	7.25449
DAP3|7818	6.64446	7.14818	7.77777	8.02307	7.44929	7.71378	7.13316	7.78192	6.67478	7.40832	7.46983	7.30803	7.8341	8.18161	7.55729	7.20122	7.27826	7.72791	7.73878	7.27537	6.81288	7.75981	7.38478	7.71818	7.27731	7.28861	7.66714	6.81472	7.86128	7.80182	7.21996	6.22424	7.21624	7.47652	6.68061	6.93347	6.88894	7.40257	7.52139	7.82378	7.21247	8.03194	7.06146	6.65694	7.34783	7.0475	7.42768	7.30845	7.34079
KLHDC3|116138	5.85024	6.30933	6.09327	6.13332	5.79651	7.08497	6.47618	6.04307	6.31389	6.24738	6.74382	6.28226	6.12161	6.75415	5.99475	6.46507	6.04319	6.24076	6.73536	6.08979	6.18527	5.92213	6.36105	6.28783	6.20987	6.5788	6.12034	6.01088	5.85351	6.33583	6.21275	7.03603	7.58914	5.52352	5.92166	5.88039	7.1278	6.60674	6.53921	6.24059	6.42244	6.57293	6.63053	7.04025	5.84256	6.35831	7.39688	6.6011	6.63943
PRMT1|3276	6.69424	6.83979	7.31832	6.32806	6.8152	7.04588	7.71056	6.65629	7.80074	7.02624	6.88755	6.37355	7.21985	7.78593	6.355	7.20854	7.14838	7.05788	6.51229	6.68644	8.60586	5.77236	7.51939	7.12091	6.89101	7.40852	7.51502	6.62872	6.1729	7.31087	6.74624	6.4765	7.29478	6.14009	6.39627	6.45414	6.20525	6.50226	7.50306	7.29718	7.54273	6.47228	6.35039	7.30167	6.28733	6.60707	7.49591	6.87177	7.50561
FTSJ1|24140	5.1553	4.97728	4.96152	5.31202	4.71114	5.516	5.07304	5.04765	4.76314	4.40224	4.98444	5.90579	5.11927	5.02243	5.4922	5.19882	5.71054	5.3963	6.04507	5.43104	5.34224	5.34855	5.14673	5.39661	4.86108	5.53521	5.36367	5.2698	5.29556	4.58356	5.3123	5.42262	5.84686	5.21052	4.92276	5.21	5.00903	5.68419	4.90538	5.60483	5.49189	6.05683	5.10134	5.28303	4.86163	4.74291	4.88337	6.06931	5.33533
RPL34|6164	8.003	9.52925	9.86423	8.7232	9.5767	8.34869	9.19057	8.98793	10.1413	9.26298	9.66852	9.96256	9.16081	9.81989	8.97878	8.39216	8.99813	8.09008	7.84896	9.05809	9.74725	10.1854	10.0303	9.32382	9.21285	9.58188	9.14915	9.353	7.68168	9.11195	9.04305	8.47102	8.47776	10.4356	8.05188	8.50277	8.25591	8.70616	9.50143	9.55519	8.95862	8.65256	9.56517	9.77806	8.15274	8.87875	10.0252	9.11208	9.2036
RNF7|9616	5.57343	5.41405	5.51108	5.7594	5.46332	5.79624	7.21502	6.14485	5.75869	6.03812	6.04818	6.3926	6.17705	6.74639	6.15631	5.75891	5.25428	6.44879	5.68793	6.74216	6.0214	5.6572	5.84113	6.36592	6.11525	5.85483	5.1866	6.4285	6.43828	6.31149	6.2659	5.82609	6.36828	6.12223	5.79586	5.63165	5.77655	6.65999	4.93884	5.7382	6.0625	5.76483	6.56254	6.24515	6.84078	6.27	6.49188	6.18138	6.29834
RAB13|5872	6.62346	7.33601	7.75655	6.81153	6.87292	7.84524	6.5443	7.64437	7.32165	7.33282	7.21495	7.02036	8.45693	6.73791	7.74703	7.37708	6.90541	7.14919	6.97556	7.4815	7.30007	7.29231	6.84379	7.51685	7.71527	7.42003	6.47716	6.67127	7.3432	6.80219	6.38179	7.99727	6.97303	5.88521	6.36536	6.84202	7.63295	7.41415	6.75805	7.0218	7.8971	6.67678	7.12458	7.12344	6.78856	6.60773	7.78362	7.56748	6.6832
TMEM85|51234	6.19404	6.31085	6.90952	7.10423	6.06695	7.5612	7.67065	7.26111	7.54111	7.602	7.28225	7.70737	7.49589	7.17452	6.5046	8.53411	6.88987	6.53704	7.63507	7.17096	6.24598	7.60213	6.39321	6.72029	6.89652	6.87065	7.36519	7.51052	6.98137	7.21859	6.87843	7.79362	7.04736	7.48561	6.55442	6.59802	8.00334	7.61271	7.4095	7.30533	6.80171	6.74429	7.16317	7.87731	6.85166	6.74919	6.79027	7.20374	7.04266
DDX56|54606	5.29663	5.45619	5.84312	6.45712	6.30274	5.59616	6.32307	5.84411	5.96139	5.85512	5.712	5.9623	6.38905	6.69016	6.98709	6.12801	6.00111	6.38517	6.79129	6.64151	6.08081	6.33381	6.31618	6.63469	6.2024	6.25859	6.42854	6.57329	6.48566	5.66226	6.25586	6.22796	5.88764	5.93567	6.11893	6.50114	5.87973	6.15932	5.8681	6.67423	5.9397	6.248	6.35996	6.96394	6.71229	5.76561	5.89761	5.80243	6.09506
CD9|928	8.37968	9.43702	8.76071	9.24422	8.50954	9.55891	9.05769	9.97259	9.39295	9.59291	9.1595	9.28496	10.3363	8.7404	9.08911	9.62216	9.72707	9.35515	9.90342	9.29932	9.00692	9.61445	9.78269	9.57724	8.58616	9.909	10.0426	9.49191	7.6466	9.15363	9.27134	8.70943	10.4503	9.9098	8.91878	8.79411	10.6069	8.24568	9.74931	9.64804	9.9711	9.36592	9.96242	9.37145	8.93167	9.35881	8.9522	9.93802	8.05929
C1orf128|57095	5.29431	5.64568	4.84658	6.22451	5.43195	5.82966	6.13895	6.10139	5.3887	5.48302	5.74554	6.26213	5.36477	5.13296	5.30618	5.2466	6.0005	5.28669	5.49342	5.58633	6.05923	5.20814	5.82575	6.10663	5.64812	6.00293	6.25171	5.5175	6.23451	5.91658	6.11233	6.04637	5.80371	4.97541	5.13761	5.24459	5.10178	5.48856	6.01918	5.2808	5.53797	6.16109	6.71662	5.15747	5.70103	6.32553	5.36988	5.37422	4.97522
NAT15|79903	5.17637	6.16533	5.34591	5.73626	6.14669	5.54115	5.46472	5.28596	5.02014	5.48618	5.57641	5.26738	6.21547	6.20697	5.32965	5.17655	5.14974	5.6143	5.35215	5.83723	5.57094	5.46487	4.72941	5.84178	5.21954	5.69494	5.91798	4.91528	6.25439	5.48479	5.74682	5.73204	6.02584	6.01254	6.0475	5.93694	6.07704	5.53799	5.28542	6.42239	5.84219	5.43796	5.33375	5.75085	6.53173	5.80566	5.85867	6.12216	6.01907
IDH2|3418	9.49926	7.8211	9.23303	7.69644	7.98825	8.42271	8.18423	8.7087	8.36797	8.14447	8.52296	8.63944	7.73815	8.53251	7.25673	8.22727	8.75588	8.03197	10.4816	8.06384	8.59583	9.06711	7.91053	9.17057	7.71223	7.97131	8.46325	9.41315	9.02281	8.49089	7.63946	8.09941	8.3316	8.75645	8.47612	9.12102	8.70585	8.55072	9.87213	7.73836	9.27922	8.50877	9.32081	7.41219	8.54036	7.44113	7.63351	7.85437	9.2486
TMEM14C|51522	6.87313	7.07372	6.73716	7.56089	7.29464	7.58159	6.65374	7.16275	8.09509	7.60086	7.28204	7.18559	7.4485	7.45689	7.86678	7.00664	7.33998	6.39255	7.80138	7.9865	7.10889	7.22736	6.94511	7.60428	7.48684	7.34238	7.72942	6.8526	7.82584	7.00085	7.18089	7.68288	7.24182	7.18305	7.92103	6.5436	7.65104	8.29929	6.54453	7.66866	7.49585	7.63144	7.56645	7.32486	7.77963	6.95048	7.11269	7.51855	9.39486
SCYL1|57410	5.73058	5.96966	6.05698	5.97086	5.40456	5.62049	4.98065	5.47721	5.99913	5.51512	6.08758	6.13177	5.49415	6.08134	5.56822	6.19485	5.69932	6.11136	6.56723	6.00666	6.66169	5.86223	7.4693	6.19335	5.35892	5.33616	5.68651	5.69638	5.50353	5.67173	5.69353	6.1958	5.68473	5.37019	6.22705	6.29519	6.32168	6.52183	6.58765	5.43404	6.31284	5.7552	6.19831	7.07389	5.77233	5.91358	6.02529	5.80967	6.60378
DCTN1|1639	5.6315	7.17105	6.39541	6.32856	6.08927	4.85416	6.1064	5.34057	5.81189	5.54623	5.93484	5.22963	6.87108	6.33194	7.52239	6.27286	6.16994	6.0573	6.1106	6.58966	6.57391	6.25248	5.62917	5.89731	5.97794	6.18143	6.47839	5.68204	6.54764	5.91032	6.0491	6.7883	7.47926	5.64932	5.7505	6.05529	6.25848	6.06068	6.195	6.44507	6.49547	6.00414	6.14383	6.48223	7.00165	6.31521	5.89251	6.23108	6.52876
HSPE1|3336	6.60368	7.88509	6.8453	7.76445	7.68724	7.93628	8.2484	8.42474	8.1344	8.27088	7.57831	7.25561	6.93369	7.46493	7.58414	6.8707	8.30451	8.59978	8.07166	8.02383	8.2705	6.92555	8.71091	7.75301	8.1363	7.41612	8.2284	7.78893	8.46254	8.96899	9.12614	8.13725	7.53345	7.48556	8.32474	8.90957	7.837	7.51085	7.86577	7.51744	7.59905	7.54966	7.85754	7.87233	7.64898	7.78761	7.60237	7.60023	8.06839
ADD1|118	5.9406	6.8204	6.69934	6.89502	6.4266	6.98792	6.88348	5.80914	5.95147	5.98746	6.93945	5.86926	7.15025	7.00131	6.90915	6.7114	5.52377	6.94107	5.87466	7.01447	6.92607	5.95072	6.06818	6.74978	5.9762	6.10877	6.44038	6.16486	7.16912	6.035	5.92423	6.73152	6.39091	6.15625	6.06108	6.51484	6.20588	6.73674	6.26762	7.07871	7.28409	6.50811	6.52493	7.36637	6.50271	6.18897	6.70518	6.68067	5.78922
ZNF410|57862	5.30091	5.75864	5.45638	5.96792	5.71626	4.63567	6.22657	5.70574	5.72312	5.09101	5.5151	6.29287	6.25617	5.99045	5.48135	5.98786	5.76536	5.27063	5.81	5.06901	5.67183	5.84987	5.77525	6.0048	5.80507	6.08407	5.929	5.41071	5.29529	5.94047	5.58401	5.08329	5.64006	5.87377	5.90722	5.53975	6.12927	5.80974	5.98183	5.46039	5.97658	5.73504	5.52933	4.91077	5.61779	5.92822	5.70721	5.53876	4.92333
HSPA8|3312	9.95582	10.8546	10.5201	10.7302	10.9826	11.1947	10.6372	9.05712	9.58693	9.68272	10.8153	9.3197	10.1788	10.7445	10.3393	10.1513	10.627	10.6892	10.553	10.532	11.1772	10.6585	10.6407	10.704	8.33775	9.81258	10.1632	9.30927	9.30893	10.9336	10.7664	9.26075	10.5802	10.6388	10.7523	10.7885	11.117	10.6514	10.3666	10.3511	9.97072	10.5983	10.553	9.0821	10.2275	10.9205	9.44701	9.81347	9.89226
ITGB1BP1|9270	4.23557	5.62243	4.50873	5.12458	5.23158	4.92137	5.14219	5.0802	5.12354	5.27975	5.31595	4.60268	5.12154	5.02864	5.17558	5.21584	4.9623	5.44256	5.79253	5.43984	5.0916	4.79041	4.7365	5.0037	5.284	5.45157	5.19347	4.81168	5.53927	5.33502	5.33169	5.2462	5.8933	4.89544	4.69063	4.98403	5.04496	5.20209	5.46498	5.25147	4.85462	5.13203	4.58192	5.02845	5.58351	5.17902	5.13047	5.74429	5.04914
IMP4|92856	5.27359	5.3486	5.91603	5.93539	5.879	5.70694	5.88163	5.97737	5.96962	5.66047	5.79526	5.52717	6.02162	6.95794	6.31499	5.66745	6.10074	6.23684	6.02599	5.80227	6.02921	5.7841	6.25289	6.31063	6.01254	4.74039	5.24827	6.16753	5.19888	5.57231	5.86307	6.5327	5.74611	4.85926	5.38441	5.84082	5.38175	5.84754	6.89451	5.7614	5.84639	6.02863	6.13636	6.6612	6.0641	5.38042	6.23865	5.89432	6.1934
TMED10|10972	7.50475	7.53826	7.42224	7.4244	7.41017	6.28926	7.74228	6.98737	7.60108	6.94043	7.53772	7.84753	7.57997	7.56639	7.75895	7.78581	7.2464	6.89944	7.59396	6.85091	6.96905	7.77438	7.56888	7.4291	7.2466	7.13429	7.29362	7.66822	6.90362	7.10087	7.23769	6.16357	7.68434	8.1921	8.30866	7.0799	7.49789	7.13712	7.74537	7.22541	8.16763	7.86217	7.40712	6.22699	7.73596	7.93522	7.51335	7.37261	6.49729
ATOX1|475	8.1087	9.49718	8.18284	7.33135	7.62005	8.3128	9.15219	9.44847	7.80939	9.04187	8.90664	8.51124	9.08573	8.49441	8.14556	7.76509	9.12497	7.49516	8.29711	8.18542	8.02469	8.37368	8.44737	8.65805	9.37157	8.12834	8.66386	8.08209	8.7931	8.601	8.1759	8.93378	8.13965	9.05858	7.05658	8.47147	8.27719	7.57388	8.45584	7.9552	8.99535	7.08887	8.38671	8.82818	8.11406	8.17457	8.55909	8.47817	7.82601
IP6K2|51447	5.80362	5.76428	5.83542	5.56771	5.92083	5.91324	6.08763	6.37789	5.40068	6.12324	6.33449	5.98702	6.09108	6.65879	5.45029	6.03729	6.51806	5.64818	5.87258	5.76341	6.34867	6.2811	5.63797	5.76298	6.91294	6.51583	6.29073	6.40364	6.25058	6.30154	6.40393	5.95257	6.05429	5.99521	5.12883	6.01274	5.42467	5.86917	6.50767	5.61132	5.87252	5.86068	6.98183	5.83823	5.28369	6.16606	5.78966	5.84686	6.77564
AES|166	7.66427	9.01981	8.28345	7.21692	7.64358	8.76087	8.66606	8.77133	7.85472	8.60494	8.35487	8.69593	8.58507	8.18926	8.80151	7.80958	8.38089	9.45501	8.03908	7.63999	8.60447	7.13495	7.79039	8.81472	8.35596	8.54611	8.15947	8.07848	8.12087	8.08513	7.85063	8.4181	8.89955	8.07689	6.39461	8.30929	7.87316	7.86324	8.22378	8.2398	7.99266	7.08448	8.30252	9.20611	6.86368	7.73721	8.85148	7.95776	8.2949
MAP4|4134	6.65385	6.38552	6.54045	6.6223	6.66205	6.19785	7.07955	6.32803	5.84778	5.99867	6.9625	6.13747	6.1577	6.6334	6.57124	6.46674	6.64519	6.5436	6.84387	6.46364	7.11988	6.20003	6.32425	6.08661	6.47843	5.99889	5.5518	6.12577	6.67395	6.52201	5.99089	6.49598	6.93589	6.73159	5.94023	6.54298	6.08604	6.95348	6.47879	6.69403	6.67544	6.79805	6.27573	6.29449	5.78347	6.01263	6.03571	6.78087	6.94795
GLRX3|10539	5.4528	6.13082	5.65547	5.89234	6.50186	6.2842	6.26455	6.02512	6.50577	6.05002	6.22245	5.26638	6.51456	6.48285	7.05021	5.76851	6.08202	6.3026	6.92825	6.91711	6.86764	6.1444	6.07471	7.1794	5.76376	6.50545	6.54866	5.73959	6.05643	6.41741	6.65753	5.60894	7.80969	6.77061	5.60469	5.83539	6.47511	6.87731	6.41458	6.42617	6.11214	6.45491	6.249	5.82873	6.16313	6.13794	6.45368	6.77273	6.19581
SMARCB1|6598	6.60318	6.34789	6.28027	5.99198	6.40787	6.23157	6.48183	6.19357	6.18637	6.04295	6.08993	6.50253	6.90404	6.66204	5.94959	6.61382	6.98534	6.03142	6.7668	6.96017	6.92498	6.30337	6.49469	6.51892	6.04825	7.16003	6.59535	6.49324	5.98539	6.49505	6.39893	5.91577	6.78182	5.80605	5.6132	6.19836	6.41408	6.34235	6.76644	6.1368	7.84056	6.67895	6.2203	6.14971	7.00492	6.12213	6.74322	6.911	6.84027
VASP|7408	6.01384	6.21177	6.46914	6.55256	6.16157	6.18341	6.99152	6.47747	6.90998	6.15463	6.50105	6.74315	7.14805	5.84101	6.60484	6.89097	6.83159	7.12963	6.0085	5.97545	6.45022	5.66274	6.56883	7.1515	7.26471	6.46923	6.79166	6.03855	6.17845	7.04787	5.94938	6.73348	7.35633	6.72462	5.64146	6.23469	6.86785	6.79397	6.62658	7.04919	6.87412	6.3908	6.73015	6.39326	6.19493	6.25025	6.74135	7.05751	6.61547
MRPL36|64979	5.49419	5.85938	5.74443	6.66223	6.63269	5.76703	6.1013	6.72881	6.05778	6.73341	7.08988	6.30844	6.02773	6.28312	6.47852	5.69594	7.19182	6.38625	7.21318	6.12936	5.81498	6.58964	7.68879	6.45808	6.03888	6.3167	6.69745	6.46004	6.23964	6.38939	6.60786	6.47778	5.75211	5.95881	6.33176	6.56264	6.0883	6.29771	7.04059	5.75701	6.06994	6.98004	6.50972	6.39206	6.93087	6.07669	6.37742	6.42719	6.81967
PRPF19|27339	6.31171	7.21789	6.74813	6.47299	6.99772	6.9283	6.84478	7.00251	6.95491	6.2459	6.60569	6.46367	6.0836	5.96905	5.89378	6.9491	6.37806	6.70296	7.62024	6.77168	7.26193	6.99603	6.57708	7.21036	6.56182	6.90213	6.42277	6.37217	6.10731	6.76157	7.72207	6.54372	7.17328	6.76635	7.35903	6.47007	7.00634	6.77404	7.85411	6.6598	6.30716	6.60132	7.87065	6.8853	7.53738	6.95785	7.1604	7.94931	7.15425
TXNL1|9352	5.99074	6.70045	6.29553	7.035	6.79665	7.22184	6.66624	6.22958	5.99816	6.55982	6.70822	7.08485	7.27041	6.81833	6.44093	6.03893	7.24343	7.37039	5.97531	6.72164	7.00234	6.3121	5.88802	8.02174	6.28578	7.47819	6.97473	6.15068	5.82969	6.27637	6.87916	6.20935	6.28304	6.67361	7.02812	6.38753	6.51341	7.42999	6.28232	6.84636	6.26792	6.55832	7.28052	6.18738	6.17258	6.9814	6.91055	6.65227	6.26462
MRPL20|55052	6.58457	7.37429	6.58517	7.08389	6.67915	7.14165	8.05812	7.82184	6.92275	8.24541	8.34901	8.21095	7.15383	6.86649	7.20407	8.73181	7.73907	7.09195	7.37553	7.53448	7.71305	6.8859	7.871	7.83898	7.61506	8.03938	7.55178	7.73277	7.93725	7.6648	7.77525	7.28948	6.88774	5.94724	6.91363	7.54147	6.78158	7.00843	7.90872	7.02779	7.75164	7.65999	6.98954	7.81808	7.62793	7.58037	7.03621	7.43687	7.12107
MRPS33|51650	5.46868	6.68174	6.13473	6.89369	6.85408	6.56055	7.01187	7.05985	7.02592	7.32813	6.24826	7.41625	6.90519	7.18622	7.24675	5.77197	6.12163	6.37469	7.07604	7.09549	6.31075	6.91386	6.51385	7.20166	6.86191	6.73681	7.02727	6.69748	7.05488	6.70016	6.95766	6.56531	6.35158	6.76372	7.30002	6.40057	6.80147	6.89407	7.5645	7.34315	6.90864	6.86253	5.74729	6.43618	7.1771	6.44578	6.94782	6.74193	6.79589
PMF1|11243	5.27385	5.48434	6.61554	5.91372	6.07447	7.00914	6.40594	6.94194	6.30266	6.67222	6.24804	6.91537	6.94298	6.24318	5.79188	6.15458	5.64337	6.63665	5.8649	6.04068	6.43644	6.44839	6.12017	6.42298	6.32058	6.18645	6.62847	5.88451	6.49205	6.29131	5.23498	6.0781	6.60808	5.60186	5.38289	5.45979	5.78979	6.7036	6.36406	6.5137	5.93169	5.98234	6.21049	6.43658	5.62507	6.02733	6.2812	6.25956	5.95706
CIRBP|1153	6.35643	8.0169	7.78669	7.28814	7.88953	8.92148	7.83457	8.1198	7.92814	7.68503	7.1738	8.14163	8.27352	7.89158	6.45993	8.5107	7.37039	6.28442	7.47661	7.15216	7.75329	6.78454	7.28733	7.34457	7.85347	8.02012	7.49207	7.24039	6.76555	7.4268	7.23263	7.57058	7.41356	7.31467	6.98299	7.23808	6.55751	7.11992	8.03948	7.53935	7.5134	7.00633	8.18517	7.82309	7.64554	7.00231	7.90013	7.93862	7.62862
TMED2|10959	8.65734	8.02697	8.58347	8.56395	8.77383	8.79418	9.25465	8.08912	8.79671	8.10516	8.7524	7.97868	8.5395	9.04846	8.71873	8.4297	8.79956	9.02108	8.63546	8.64293	8.45285	8.58816	7.83138	8.70773	7.44215	8.44883	9.36928	8.57876	7.48348	8.22381	8.22654	8.62157	8.90906	9.68699	9.31601	8.77991	8.33991	9.20189	7.88045	8.91957	8.76477	9.06732	9.35664	8.17044	8.81001	9.00782	8.5338	8.50057	7.6536
LCMT1|51451	4.6837	6.08466	5.54287	5.57452	6.00695	5.3805	5.32731	6.04159	5.88915	5.47696	5.68237	5.99259	5.48415	5.99116	5.63976	5.47667	6.30198	5.64083	6.15731	5.6127	6.55342	5.77305	5.31314	6.16508	5.66838	5.94512	5.85473	5.18718	5.67055	5.67841	6.27737	6.54939	6.06016	6.06706	5.82687	5.24001	6.29966	5.88727	5.82369	5.85144	5.89895	5.48151	5.35596	5.49082	5.3426	5.28087	5.96186	6.14715	5.88751
ECHS1|1892	6.33429	7.71514	7.37261	6.75484	8.76112	7.96927	7.49851	8.04447	7.69337	7.28538	7.96726	7.16483	7.71322	8.36968	8.13268	7.17869	7.73916	7.1175	7.95731	8.0492	8.31033	7.68481	7.63242	8.59337	8.04449	8.02962	7.63106	7.75644	7.95806	7.31704	7.7469	7.15638	8.279	6.97389	6.7377	6.99391	7.12386	7.61735	8.16483	7.64816	7.42778	7.47427	7.08729	7.40944	7.13522	7.29673	9.25728	7.68069	7.45796
ATP5H|10476	7.52253	8.62651	8.887	7.8277	8.91547	9.0203	9.14294	8.22064	8.88125	10.4361	8.88693	8.35432	8.3536	9.71831	8.47578	7.81332	8.69394	8.88741	8.72789	8.64689	8.69385	7.7166	9.75089	9.73677	9.87794	9.82388	9.67577	7.93356	9.01235	9.04602	8.89525	8.189	8.7463	7.92829	8.62167	8.76608	7.75075	9.5702	10.2252	8.21041	8.46932	8.62726	9.01811	8.85485	9.55942	8.83555	8.07618	8.83516	9.16631
OVCA2|124641	4.16896	4.88967	4.98217	6.11243	5.08589	4.69413	5.39289	5.24853	5.22338	5.86664	5.26534	5.14772	5.56368	5.95004	5.78493	4.85863	4.96133	5.03574	5.42764	4.93799	4.8852	5.06502	5.2545	5.14048	5.77028	5.19411	5.44824	5.29954	5.14009	5.33212	5.24879	5.20508	5.26609	5.28078	5.9579	4.94923	5.12941	5.47412	5.50984	5.61352	5.28845	5.51956	6.29768	5.0367	5.28322	5.09276	5.84739	5.59945	5.29175
DDX17|10521	7.77284	7.64027	7.08957	7.94728	8.28455	8.27642	7.22113	6.85906	7.10413	6.32708	6.85703	7.12842	8.55474	7.99886	6.94821	7.825	8.20537	7.7999	6.58309	7.76217	7.07505	7.34875	6.97675	7.98366	7.29911	7.62947	7.71673	6.90361	7.90257	7.52162	7.00636	7.05735	7.26997	8.50929	7.51507	7.35798	7.1495	7.72844	7.05998	7.72071	8.26406	7.75621	7.39501	6.56497	7.34257	7.84673	7.78779	7.27265	6.94737
COMMD1|150684	5.51076	6.28389	6.13309	5.2883	5.63284	6.41353	6.48608	6.053	5.98647	6.48092	6.18141	5.48032	6.25975	6.19563	6.5744	6.17697	6.15768	5.60069	5.84454	5.94902	6.08051	5.39453	6.01981	6.62796	6.3135	6.23888	6.69773	6.41334	6.10685	5.47341	6.76885	5.98776	6.88172	5.75053	6.10552	6.03274	4.99025	6.1429	6.24415	5.96276	5.80719	5.71921	6.83465	6.66031	6.41808	6.53686	6.25657	5.95238	5.8077
MARS|4141	6.01389	6.34459	5.8511	6.41814	6.08155	6.44929	6.66936	5.11125	5.84521	5.25491	6.33469	5.51568	6.86243	6.73436	6.37325	5.52032	6.38352	6.56921	6.56903	6.55731	5.98511	6.35692	6.55159	6.74177	5.42938	5.9177	6.62047	6.12169	5.26429	6.19613	6.0479	6.75787	6.7731	6.00648	6.72425	6.32807	6.01552	6.73675	5.8882	6.26748	6.88218	6.36602	6.71912	5.72338	6.09332	6.45546	6.09051	6.72721	5.71239
SAE1|10055	5.96482	6.63937	6.34581	6.42166	6.03658	6.9611	7.18751	6.16401	7.35431	6.7986	6.7785	6.43903	6.66909	6.87379	7.01158	6.74505	6.88955	6.868	6.79259	5.86837	6.43512	5.79525	6.66137	7.06757	6.23597	6.76616	7.59683	5.59333	6.7107	8.38649	6.2754	6.22305	6.89847	6.55372	6.69747	6.75588	6.72629	6.65497	6.94779	7.05836	6.97385	6.28087	6.93922	6.47866	6.70668	6.86144	6.66874	6.35067	6.81258
DNAJA1|3301	7.77962	8.04756	7.62887	7.97717	8.37818	8.34841	7.70949	8.19518	7.49204	7.34303	7.71108	8.61255	8.01043	8.35266	8.0259	8.29445	8.08005	7.75903	8.15449	7.57979	7.86599	8.02075	8.49587	7.59984	8.25379	8.18893	8.99044	7.56808	7.44746	8.87289	8.51409	7.09081	8.61076	7.40675	7.80005	7.96385	8.32636	7.99003	8.33268	7.61403	7.57659	7.37036	7.62812	6.5736	7.46653	9.08556	7.43833	7.77663	7.57544
HNRPDL|9987	5.59533	5.98519	6.35535	6.36383	6.80413	6.51727	5.94837	5.88835	5.4167	5.63405	6.15414	6.71279	7.14392	7.01153	5.68554	6.6138	6.46836	6.1882	5.35847	6.13458	6.13174	6.23842	6.31324	5.55093	5.80267	6.23929	6.48563	5.63519	6.04496	6.68192	6.08586	5.84604	6.22378	5.73172	5.84846	6.04823	5.69675	6.19259	6.16931	6.57248	6.19594	6.85786	5.98748	5.89979	5.85163	6.54146	6.14156	6.40388	6.25757
PRDX5|25824	7.15411	7.89597	7.59689	7.66152	7.09022	9.12111	8.67066	8.61615	8.97521	9.23449	8.64431	8.38825	6.83744	6.58944	7.87958	7.75982	8.51593	7.89123	8.97922	8.66324	8.67335	7.39203	9.24122	8.24533	8.34726	7.89917	6.9397	8.28643	7.97593	7.88004	8.03905	8.4395	8.02706	7.69494	8.1157	7.63435	8.55904	8.89965	8.51137	7.78063	8.57471	7.20309	8.18016	8.72652	8.13345	8.07983	7.97962	8.46471	8.62941
HDLBP|3069	7.86453	8.40294	8.20025	7.86232	8.09038	7.57635	7.97832	6.19296	7.03398	6.52898	8.52362	7.0521	8.30741	7.85347	8.42975	8.29942	7.95153	7.424	7.66427	8.35006	7.27675	8.8057	8.30223	7.21238	6.34614	6.89372	7.27385	7.41176	8.18032	7.54723	7.49113	8.44217	8.12474	7.11671	8.18926	8.53015	8.52227	8.46465	8.07786	7.47493	7.91534	8.47704	8.17344	8.12345	8.32122	8.20413	7.57583	7.85244	8.06655
HMGN1|3150	8.29603	8.19584	7.53284	8.45594	7.56096	8.34769	8.85287	8.35613	8.03972	8.09186	9.04977	9.8354	8.36492	7.73817	8.20996	7.97453	8.54665	7.8705	8.43936	7.26177	8.39469	8.60221	10.2522	7.46229	6.95364	7.8022	9.08941	7.75642	8.68474	9.04276	8.63257	7.62925	8.54909	8.25936	7.14752	8.74041	8.89483	8.60698	7.8714	8.59013	8.81295	8.87347	7.89696	8.24894	8.4254	7.87938	7.16854	9.01316	7.73687
HN1L|90861	6.53066	8.24069	6.80768	7.37665	6.97549	7.52459	6.9464	6.69428	6.52187	7.05108	6.82632	7.31798	7.13836	6.95019	6.66612	7.21586	6.57751	6.96323	6.47652	6.86647	6.81255	7.21393	6.3835	7.44991	6.93869	7.0693	7.70586	6.78393	7.50169	7.07475	7.50547	7.1317	7.61315	6.88688	7.06597	7.78304	7.57208	5.85763	7.19615	7.63948	6.63623	7.70913	7.43862	6.45888	7.46939	6.79548	6.96478	6.41101	7.11416
SLC25A39|51629	6.49935	6.33237	7.52253	6.42953	6.5132	7.8078	7.86179	6.8414	7.70616	6.59897	7.74883	6.87223	6.83094	6.85001	7.25949	6.33863	7.36314	7.56966	7.82899	6.28482	7.02483	6.34412	7.09192	6.77367	6.74265	6.57289	6.92531	6.90149	7.6549	6.2491	6.48485	7.11974	7.18241	6.02619	7.65708	6.04753	6.92572	6.67948	6.72633	7.1062	6.97084	7.18843	6.61488	6.71689	6.82687	7.08665	7.18486	7.21221	6.8507
DBNL|28988	5.84901	6.43949	6.33252	5.99576	5.76038	6.52123	5.79071	5.48979	6.4739	5.80654	6.3384	5.62032	6.42667	6.07813	6.79123	6.63957	5.72297	6.37461	6.5478	6.47077	6.23101	5.6053	6.24712	6.3242	6.16546	6.32567	5.78759	6.33952	6.19598	6.01621	5.80682	6.39686	6.00416	5.55302	6.28256	6.04181	5.79387	6.73012	5.88201	6.36748	6.78956	6.1671	6.73898	7.40212	6.76189	5.98884	6.63573	6.56549	6.79987
ADH5|128	5.49789	6.38653	5.91788	6.60628	6.31711	6.45339	5.92203	5.76401	5.69181	5.8775	6.45514	6.34793	6.51102	6.7131	6.18823	5.94882	5.77333	5.35646	6.39835	6.22494	6.3975	6.05612	6.05536	6.37882	5.48237	5.978	6.61687	5.54156	5.39909	6.10574	6.15873	5.53598	6.49988	7.29342	5.94282	6.75506	5.42835	7.87829	5.81204	6.25107	6.621	6.21943	6.41957	6.16095	6.46456	6.27063	6.11931	6.45255	6.92902
SEC24C|9632	6.38496	6.52895	6.70898	7.48635	7.54316	7.17989	6.04659	6.46181	6.58715	6.1762	6.51195	6.55259	6.74539	5.69726	6.89958	6.35303	6.47645	6.18865	6.40231	6.95104	7.06147	6.82346	6.1367	6.67268	6.26161	6.37981	7.26529	6.10739	6.49273	6.32912	6.60651	7.70782	6.7798	6.42088	6.60429	6.45702	6.29966	7.15251	6.6907	6.48372	6.36376	6.468	7.42434	6.51628	8.09341	6.26148	7.40883	6.37647	6.48993
PARL|55486	4.95692	5.68816	5.50078	5.73078	5.63726	5.32736	6.59551	6.24228	6.1223	5.90638	5.82235	5.69184	5.71206	5.94034	5.8193	6.27611	7.4833	6.06064	6.37875	5.90905	5.45147	5.36036	5.37064	6.21493	5.84199	5.59287	5.49873	5.43864	6.48392	5.92429	5.90766	5.87021	6.3389	6.1845	5.14982	5.32299	5.97082	6.75775	6.2013	6.00295	6.13883	5.7397	5.54599	5.78106	6.53973	6.1809	6.03817	5.96547	5.72518
VPS29|51699	5.85156	5.974	6.2214	6.59181	6.35245	6.80831	7.06475	6.43755	6.78583	6.69568	6.41862	6.7212	6.70318	7.58833	6.75635	6.15717	6.69753	6.54559	6.73621	6.86552	6.39208	5.71036	5.88448	6.59613	6.64282	7.30029	7.14166	6.53263	6.30543	6.83274	7.43336	6.62795	7.14024	7.24482	6.71828	7.74483	6.15957	7.40664	6.29682	6.3788	7.04055	6.55734	6.52719	6.51946	6.76837	7.26614	6.57738	6.94309	5.77476
PSMD6|9861	6.48691	6.09634	6.30565	6.96822	6.44925	6.48865	6.58653	6.75908	5.80677	6.51149	6.84865	6.78901	6.14357	5.94349	6.84012	6.29497	7.35861	5.92337	6.67751	5.97002	6.45361	6.87276	5.80935	6.65675	6.53448	6.24834	6.29646	6.55417	6.75844	6.59097	7.40324	6.02295	6.68094	7.16923	6.54857	6.67053	6.91464	6.45151	6.48952	6.10258	6.14599	6.69433	7.29128	5.9108	7.76882	6.90901	5.95251	6.20779	6.83977
UFD1L|7353	5.40336	6.19722	5.64166	5.12446	5.3162	6.02517	6.47737	6.31741	5.8063	5.94239	5.58843	6.34121	6.37895	6.07909	7.31846	5.66774	5.58565	5.4767	6.18588	6.25064	5.76425	5.36075	6.13142	5.91467	5.71768	6.23953	5.41554	5.98973	6.26085	6.2492	6.54582	5.37352	5.81757	5.85656	5.31354	5.45019	6.49138	5.37414	5.9341	5.89978	6.38606	5.94086	6.05322	5.58369	5.91587	5.76408	5.80795	6.23802	5.41984
GLRX5|51218	5.48012	6.52109	5.86604	5.46861	6.36878	6.95568	6.68768	5.97464	6.22931	5.99117	6.0034	6.85188	6.24697	6.62583	6.2797	5.85435	6.77201	6.53357	7.1088	5.7022	6.6914	6.19498	6.58233	6.64041	6.20666	6.57812	6.66862	6.04964	5.87038	6.16634	6.24289	5.37339	5.99655	6.25382	6.38337	5.48831	6.73133	5.81118	6.86384	6.56293	6.70719	6.0198	6.31757	5.19969	7.28014	6.37611	6.52705	6.17272	5.80724
C9orf78|51759	5.58957	6.48308	5.60219	6.09411	5.67962	6.17928	6.91158	6.0346	6.38704	6.10608	6.44174	5.77469	6.84956	5.67078	5.54938	6.06044	6.73943	6.52716	6.2813	6.37436	5.83465	5.70261	5.89531	6.63916	6.41766	6.26578	6.6351	5.11708	6.43019	6.26612	6.65309	6.85176	6.25488	5.36191	5.35152	6.17872	5.74218	6.30387	7.30364	5.92131	6.50489	5.73001	6.2362	6.9214	5.74809	6.18542	5.98951	6.31468	6.14968
FTSJ2|29960	4.59843	5.11028	5.08983	4.97422	5.45735	4.21649	5.413	5.03941	4.80778	5.31049	6.17875	5.38456	5.50569	5.69592	5.3633	5.56539	5.00639	5.62753	5.74238	5.47002	5.08209	5.29045	5.11044	4.488	5.46404	5.91522	5.56791	5.32038	4.893	4.95575	5.40788	5.15197	5.39869	4.76263	5.41547	5.71031	5.24533	5.72527	5.62567	5.74285	5.30026	4.9797	5.16944	5.13025	6.00108	5.08835	5.16761	5.30483	5.32017
RPL13A|23521	9.30097	10.0333	10.6401	9.59056	10.4056	10.0209	10.0215	10.2661	11.0096	10.2329	10.1388	9.95797	10.2587	9.99895	10.0855	10.3082	10.5313	9.18158	9.01953	9.15126	12.9	9.4923	10.4182	10.532	9.82309	10.4383	10.1346	9.98077	8.43059	10.536	8.88642	9.34509	9.22148	8.80034	9.19418	8.74009	9.75022	8.91901	10.2267	10.0863	10.145	9.60365	10.212	10.4991	8.78813	9.88767	10.9777	9.5858	10.0767
NDUFS4|4724	5.59878	6.4169	6.14437	5.76518	7.00052	7.10709	6.61419	6.38179	5.53812	6.24517	7.06178	7.11608	6.58282	6.56227	6.6441	6.00649	5.76452	6.25092	6.87402	6.17344	6.77055	6.06874	6.51311	6.73914	6.05941	6.81157	6.96378	5.64743	6.28318	6.67398	5.79997	6.25774	5.9674	5.95634	5.77653	5.36611	5.6372	6.67746	6.10537	6.80586	6.52289	5.89893	6.35708	6.35645	5.53169	6.02263	6.05851	7.27195	5.83599
SFRS1|6426	5.64525	6.07084	6.36752	6.28255	6.80392	6.46146	6.38274	5.69595	5.98301	5.98631	6.45329	6.14171	6.58079	6.69511	6.13645	6.52033	6.40593	6.43806	6.48207	6.46738	6.11899	6.52298	6.12676	6.17538	6.05789	6.79753	6.79333	5.83115	6.39575	6.26525	6.36902	5.77705	6.58235	6.86948	5.89579	6.52496	6.44397	6.48484	6.94256	6.93931	5.91267	6.34622	6.27525	5.9068	6.86691	6.94621	6.16907	6.25869	6.349
COPS6|10980	5.84519	6.7442	6.72352	6.32579	6.71131	6.5455	6.37375	7.16318	6.66426	7.30236	6.47327	7.13213	6.73177	7.0042	7.30121	6.20993	6.41565	5.95329	7.05323	6.87365	6.64882	6.78624	6.75227	7.30978	7.1372	7.6879	6.33506	6.17531	7.39504	6.425	6.68997	6.90939	6.63228	6.2328	6.89774	8.68436	7.39705	7.19405	7.68483	6.83168	6.91447	7.26267	6.10374	7.2545	6.81029	6.61054	6.79758	7.12181	6.53533
AP1B1|162	6.15796	6.68826	6.42293	6.27971	5.63011	6.59391	6.2439	5.85368	6.33982	6.17308	6.10336	5.29767	5.64438	6.12965	6.97464	6.75883	6.77267	6.5632	7.27665	6.82463	6.40797	6.27472	7.03884	6.47871	5.28633	6.29297	5.95903	6.26452	6.59607	6.17077	5.66187	6.19223	6.20982	5.63536	6.25192	6.21036	6.77868	5.73805	6.40805	5.64554	7.55855	6.43408	7.55397	6.36898	5.76983	5.70883	5.85609	6.00797	7.1668
TPD52L2|7165	6.32695	6.46723	6.33335	6.52127	7.90934	7.14182	7.62535	6.36863	6.42907	6.42263	5.71207	6.67805	6.57847	6.74371	6.86514	6.26597	6.22597	7.55273	7.20951	7.42804	7.32375	6.46797	6.31141	6.66617	7.00785	6.6571	6.31521	5.95098	6.92509	6.67813	6.24911	7.00373	8.01849	6.76701	6.68663	7.59254	6.07505	7.11907	8.05651	7.28005	6.78085	6.77522	6.43467	6.45549	6.43409	6.67127	6.19571	6.44878	6.62583
SAFB|6294	4.50459	5.70516	5.24502	5.42207	5.26247	5.64665	5.90309	5.46894	5.29516	5.27601	5.32221	5.39757	6.22207	5.64645	4.82139	5.77598	5.25454	5.63397	5.66329	5.49249	5.76588	5.26618	5.27994	5.66644	5.24147	5.66947	5.09979	5.21718	5.25218	5.69994	5.43868	5.64095	6.28232	4.05229	4.46874	6.0332	5.87003	5.58133	5.9251	5.67921	5.11194	5.08625	5.6067	6.16939	5.5465	5.37587	5.67202	5.3101	5.96547
CIB1|10519	8.2942	7.00134	7.57136	7.36464	7.72151	7.60272	8.06339	7.84483	7.83205	6.73674	8.26578	8.51986	8.15115	6.78829	7.67735	7.79748	7.80291	8.03269	8.65281	8.22066	7.34957	8.02092	7.15786	7.70265	8.28218	6.90646	6.86784	8.75978	8.47613	7.91631	7.34749	7.50805	7.93678	8.71946	6.61316	7.31137	8.16362	7.83601	8.46587	8.0272	8.39942	7.83327	7.79962	7.16976	6.96703	6.69254	7.08203	7.5032	7.82626
LSM4|25804	6.47211	6.7617	6.90283	6.86258	6.55886	7.98018	7.2301	7.324	7.3003	7.65785	6.97777	7.44655	6.62203	6.89421	6.56065	6.71402	7.87831	7.2653	7.09752	7.20923	7.28051	6.80686	7.02885	7.34549	6.27357	7.84016	6.27869	6.96215	7.08026	6.93976	7.13853	7.33955	6.92224	6.12033	6.60506	6.47535	7.89472	6.60017	7.09449	7.32069	6.19049	6.81461	6.83745	8.0578	7.59521	6.93557	7.05412	7.72722	7.38239
ROBLD3|28956	7.12915	6.97126	8.07195	7.41718	6.94772	7.24281	7.49124	8.05922	8.0355	8.2743	8.05769	7.50995	7.54572	6.43571	7.83481	7.60925	6.95506	7.31097	7.35212	7.65554	7.0594	7.93161	7.44646	7.15364	7.83174	7.31013	7.78729	7.32309	7.75075	7.16902	6.93223	7.5539	7.0258	5.92098	6.84526	6.52387	6.89344	7.56177	6.92096	7.88928	7.44523	6.99427	7.09365	8.00735	6.11927	6.56161	7.62222	7.48855	7.1579
DDB1|1642	6.59213	7.55059	7.39831	7.57947	7.26709	7.10182	6.87891	6.37492	6.79787	6.49462	7.3547	5.91901	5.85917	6.77082	6.74759	7.17756	6.14779	6.83346	7.9482	7.41303	7.08278	7.6583	7.15487	7.43681	5.80503	6.5058	6.88183	6.28778	7.62331	6.87617	7.22233	6.78089	6.91256	7.60978	7.89615	7.5162	7.52479	7.46034	8.19316	6.72352	6.81704	7.20093	8.02868	6.77816	7.94006	7.39877	7.01234	7.87551	7.77903
EXOSC7|23016	4.92984	4.88627	5.41152	5.36407	5.36753	5.18718	5.95259	5.06509	5.34343	5.30508	5.36675	5.99694	5.82664	5.57175	5.10086	5.17912	5.74049	5.18691	5.71483	4.54172	5.48215	5.16237	5.51712	4.95378	5.29381	5.05317	4.98047	5.30248	5.25535	5.60412	5.20863	5.52568	5.48611	4.59181	5.47386	5.14844	4.68462	5.23146	6.05904	5.28652	5.37121	4.86412	5.67154	5.17515	5.57931	5.18339	5.08394	5.57836	6.02575
GPI|2821	8.3383	8.76516	7.78378	8.69601	8.09337	8.80263	9.37644	8.76677	8.36751	8.66153	8.12312	9.0214	7.823	8.74535	8.76791	8.84223	8.84191	9.53108	9.07668	7.61509	8.74552	8.25528	7.91662	9.56289	7.71716	7.83038	8.49497	9.65209	9.28828	7.69889	8.12102	8.5375	9.11911	9.52453	7.19051	8.66782	9.26027	7.80571	9.00695	8.08882	8.7863	8.5777	7.6084	6.9749	8.3396	7.9167	7.83462	7.27949	8.9689
YPEL5|51646	6.48167	6.80938	5.68569	6.3588	5.95316	6.24001	6.48641	5.65386	5.83812	6.39544	6.33758	5.2552	6.70092	6.444	6.47689	6.44549	6.4441	5.52903	5.94559	6.08104	5.81713	6.26736	5.65997	6.61187	5.96349	6.06027	7.10924	5.8414	7.02112	6.49672	6.55259	6.4797	6.48348	7.01319	6.60969	6.47916	5.76912	6.79834	5.71002	6.20204	6.69077	5.67094	6.47937	6.24468	6.68737	6.55234	5.94452	6.61371	6.45198
PSMD7|5713	6.29776	7.15671	5.6325	6.57491	6.36843	6.96013	7.45393	5.63289	6.03452	6.49564	6.67513	6.67157	6.18789	7.21805	6.41009	6.19024	7.17423	6.43609	6.65274	6.979	6.74496	6.0424	6.62936	6.86627	5.93923	6.27064	7.66991	6.08786	6.53603	7.13818	6.23052	7.51569	6.8271	6.97444	7.18439	6.93647	6.23331	7.4156	7.53025	6.40283	7.14316	7.24763	7.3487	6.75207	7.50272	6.60153	6.03295	7.24115	7.0184
TUBB2C|10383	7.35381	8.55456	8.56965	7.69651	7.87537	9.60376	9.2441	9.17695	8.64109	8.93945	7.8792	8.711	8.68209	9.38801	7.14044	8.36681	7.83841	9.14932	8.46161	7.95106	9.08335	8.63953	8.80767	9.13162	9.53272	8.99566	8.59861	7.80399	9.21448	9.20028	8.00409	8.79767	8.85229	6.95547	6.62621	8.50994	8.21051	8.4475	9.72803	9.07663	8.54653	7.88197	9.21401	9.28435	7.83956	8.17012	7.64404	7.81892	8.62398
AP3D1|8943	5.37003	6.31748	6.52047	6.24407	5.9967	7.59526	6.81881	5.91718	5.51686	5.46099	6.15499	6.0307	6.5547	6.38244	6.30637	5.93128	6.35966	6.19903	6.54739	6.15455	6.08014	6.01599	5.43831	6.6667	5.47571	5.81572	5.60385	6.49648	6.72649	6.20942	6.07528	6.32998	6.59143	6.25325	4.78953	6.80439	6.72266	6.02903	6.55546	6.65372	5.77706	6.42249	6.91865	7.05571	5.9274	5.6585	6.00524	5.86576	6.40198
SF3B5|83443	6.67379	7.13673	7.38182	6.97822	7.15505	8.01541	8.18663	7.65912	7.65725	8.32348	7.76805	7.79972	7.22049	8.14212	6.83098	6.65162	7.81215	7.68045	7.35558	6.46569	7.64382	7.59084	7.86263	6.37174	7.2441	7.69289	7.5428	7.93573	7.17151	7.224	7.39488	6.9521	8.47195	7.37412	7.02438	6.67919	7.58989	6.48873	8.49862	7.11396	7.3185	7.11299	7.7809	7.82987	6.56568	8.05997	7.68276	7.59975	7.00857
DAXX|1616	5.21368	6.46207	5.50687	5.51096	5.64941	6.05021	5.67247	5.671	5.37842	5.31994	5.74364	5.68158	6.42507	5.81934	5.47783	5.65741	5.70186	4.98119	5.36763	6.52384	5.80499	5.09383	5.38483	5.51312	5.80304	6.0677	5.86467	5.1987	5.95357	5.63586	5.59801	6.18363	6.54663	5.20475	5.08572	5.85997	6.28734	6.33172	5.93967	5.77787	5.51336	5.92703	5.58155	5.42933	5.71275	5.74662	6.26079	5.7574	5.10726
MPDU1|9526	4.97915	5.52269	5.39347	5.57752	6.11713	6.22876	5.68476	5.73315	5.19988	6.45397	5.55211	5.84651	6.53766	6.43082	6.32346	5.39996	5.64124	5.12018	5.52177	5.68602	5.53281	5.69733	5.93443	5.76107	6.62002	5.66997	5.94695	5.53146	6.13658	5.71912	5.68968	6.06042	6.17825	6.30507	6.24975	6.11249	5.69403	6.06798	6.78695	5.92276	6.07158	5.73854	6.84615	6.22898	5.38558	5.82962	5.1237	6.3075	5.75621
CSDE1|7812	8.46811	7.71727	8.29098	8.67827	8.54059	9.1362	8.45104	7.59527	7.60129	7.93214	8.93427	7.97663	8.57138	8.42958	7.61864	8.41345	7.87041	8.86152	7.77795	8.59474	8.07357	7.73224	8.22815	8.9628	7.46806	8.23965	8.37687	6.96801	7.5167	8.0229	8.72446	7.69912	8.74534	9.08526	9.0778	8.049	8.52111	8.62859	6.89767	8.37123	8.25453	8.39971	8.58679	8.20992	9.23473	8.85466	8.8521	7.82092	7.79817
PMM2|5373	5.16585	5.35599	5.78075	5.66831	5.94286	4.86402	5.82734	5.17607	5.75718	5.15351	5.42064	6.38544	5.54098	5.74642	5.77584	5.73594	4.99333	5.87596	5.00191	5.66659	5.37161	5.90266	5.41173	5.92687	5.6643	5.39222	5.7187	5.49411	5.648	5.0674	5.62722	6.63543	5.25264	5.95119	6.12747	6.24587	5.91053	5.30094	5.07828	6.08514	5.60094	5.77831	6.09739	5.42862	6.11104	5.19275	5.76968	6.14594	6.07271
PSMC6|5706	5.77918	6.46825	5.5972	6.70694	6.04966	7.35844	6.74146	6.12804	6.32146	5.72655	5.6744	5.88594	6.9459	6.25852	6.9431	6.25472	6.15482	6.0666	6.25315	6.48357	6.29765	6.47981	5.851	7.46379	6.31601	6.50878	6.51754	6.19544	6.10209	6.50078	6.68858	5.62612	6.83106	6.794	6.35036	6.21222	6.58921	6.05053	6.01835	6.97104	6.61976	6.35897	6.51955	5.42383	6.42444	6.75657	5.53141	6.56645	7.04871
ZC3H15|55854	5.36222	6.17746	6.05377	6.18014	6.45657	6.16755	6.61229	5.86632	6.30984	5.79564	6.18004	5.19049	6.58106	6.32335	6.46326	5.9489	6.909	6.85525	6.57324	6.49159	5.85465	6.66384	6.13701	6.99428	5.2099	5.65245	6.28414	5.98965	6.4582	5.94214	6.79494	6.0049	6.13735	6.54281	5.97551	6.61482	6.24041	6.65909	5.99045	6.53699	6.01981	6.42388	6.26586	5.99125	6.44193	6.50128	6.17522	6.08512	6.14982
TRAF7|84231	5.30624	5.76051	5.9165	5.516	5.98915	5.81619	5.80222	5.27097	5.64042	5.10871	5.63823	4.90388	5.75414	6.17859	5.52183	6.15013	4.88655	5.9943	5.85938	5.99857	5.99937	5.76132	5.05045	5.99988	5.3302	5.48562	5.61066	5.34119	6.44572	5.40158	5.75479	6.55263	5.9547	4.87467	5.43988	5.57375	6.12498	5.41438	5.98639	6.23477	6.09735	6.19175	5.36118	5.57117	6.02788	5.11344	6.18762	6.09182	5.94604
RNPEP|6051	7.23023	6.42329	7.30794	6.93494	6.45611	7.90145	7.45119	6.94174	7.2166	6.58968	6.59247	7.01561	7.59047	6.57422	6.79864	6.56947	6.55296	7.30667	6.45502	5.68164	6.09484	6.66484	6.20639	7.04502	7.01974	6.53881	7.21105	6.71411	7.89275	6.84887	6.16687	6.97576	6.52132	7.19403	7.41769	6.64221	6.26664	6.84054	6.53719	7.21868	6.34428	7.38977	7.22294	6.61265	6.32199	6.05394	5.8448	6.41326	6.28064
RPL27A|6157	6.57499	6.79783	7.77618	6.85347	7.76773	6.57232	7.40284	8.11841	7.39442	7.99991	7.36375	7.04361	7.18289	7.59571	6.71254	7.28055	7.35449	6.39351	6.63712	6.21393	8.34384	7.65856	7.36528	7.63138	7.74079	7.92522	7.16824	7.13582	5.99075	7.2587	6.93392	7.0207	6.88904	6.75013	6.36467	6.65671	6.9901	7.10269	7.58593	7.94267	6.6363	6.98229	7.18901	7.12195	6.40515	7.42198	8.37255	7.31755	6.40958
SEPT7|989	6.84039	7.0357	6.54447	7.17288	6.9785	7.69536	6.97765	6.47119	6.78965	6.54721	7.62963	6.48459	7.52153	6.79061	6.78736	7.54344	6.8482	7.27585	7.17739	7.32362	6.59899	6.9474	6.79915	7.1267	6.78538	7.28315	7.2727	6.83548	7.11628	6.93399	6.91089	6.47054	6.98721	7.43911	7.29897	7.34428	6.91782	7.71975	7.14134	7.57527	7.26467	7.17129	6.47592	7.37553	7.52817	7.09959	6.92251	7.66892	6.76809
ATP5J|522	7.68722	7.47532	7.25112	7.51112	7.30986	7.57016	8.63288	7.73091	7.1432	8.22667	8.6451	8.85242	7.52138	7.52212	8.6832	6.68756	7.99577	7.3179	7.94017	6.72738	7.6421	7.72905	8.51973	7.07423	7.37014	7.41923	7.68378	7.68119	8.05622	8.17573	8.12676	6.27629	8.75634	8.14461	7.13717	8.24728	7.38973	7.042	7.81696	7.68525	7.82215	8.11351	8.02965	8.01924	7.48085	7.4986	7.68189	8.30365	7.14135
IGFBP7|3490	8.81745	8.5041	8.45517	8.26352	8.81	8.17307	8.5483	9.17621	8.57894	8.90048	9.54294	7.48612	8.38545	7.95144	8.15883	8.87599	8.50614	7.77282	8.92467	9.12527	9.19503	7.62641	8.77473	8.7849	9.64119	9.09147	7.87162	9.30228	8.10875	8.33327	8.95782	8.77586	8.79114	7.86205	7.99413	8.32814	8.31847	9.70119	7.86497	8.09772	9.57928	9.01574	8.5399	9.72268	7.11969	7.95509	8.84244	10.1464	8.41197
RBM10|8241	4.65604	4.89782	5.31167	4.33853	4.20353	5.59933	5.24723	4.78664	4.81246	4.4563	4.9329	4.88729	5.35255	4.98521	4.9239	5.2886	5.25319	5.46955	5.19348	4.96334	5.40116	4.70734	5.04548	5.01719	4.92308	5.50068	5.03256	4.5586	5.19973	5.01578	4.36536	5.28347	5.14506	4.12115	4.00162	5.22502	4.84056	4.97179	5.50934	5.06974	5.34211	4.62746	4.8965	5.18674	4.57243	4.57091	5.06006	4.86342	5.4249
SH3GL1|6455	5.23236	6.31297	6.09428	5.61965	5.57014	5.64466	6.36406	6.27554	5.80113	5.65414	5.6307	5.40882	6.2817	6.36048	5.6791	5.69447	5.82352	6.98473	6.36641	5.85573	6.59436	5.33851	5.82438	6.70143	5.76331	6.00051	5.5171	5.92893	6.28327	5.78008	5.88821	5.69063	6.44393	5.30318	5.45494	6.0113	5.7969	6.31554	6.73252	6.66664	5.83351	5.75806	6.09298	7.27523	5.72353	5.24701	5.89043	6.58328	6.57072
UROD|7389	5.27349	5.8751	6.24644	5.71368	5.30855	5.54133	5.19432	5.74328	6.22134	5.76649	5.99002	5.61488	5.6851	6.01985	5.8773	5.91862	5.16938	5.16094	6.07912	5.99849	6.06434	4.74294	5.91819	5.99234	5.39381	5.98179	5.30727	6.02399	5.64216	5.47149	6.66708	5.69831	6.09936	5.53192	5.61393	5.7258	5.92385	6.40224	6.11457	5.40431	6.46724	5.54874	6.4586	6.31395	5.24109	5.5886	6.02555	6.41071	4.95837
GTF2F1|2962	4.48781	5.85337	5.91203	5.17543	5.17702	5.91711	6.33877	5.76105	5.31623	5.19444	5.30596	5.81017	5.92854	5.99817	5.35044	5.84388	5.11513	5.00335	5.86627	5.3408	6.08895	4.82082	5.06218	6.26251	5.53162	5.48371	4.93331	5.43262	5.35411	5.25359	5.42931	5.69385	5.98992	5.62405	4.84549	5.56508	5.59735	5.63715	5.66579	5.69102	5.49798	5.37026	5.97457	6.33638	5.12706	4.68948	5.58971	5.69587	6.04865
U2AF1|7307	6.58357	7.02983	6.81432	7.10351	6.66928	7.04287	8.18939	7.27038	6.75894	7.80197	7.3564	8.79472	7.40376	6.83477	7.04786	6.74729	7.44814	6.85354	8.16319	6.69052	7.38994	7.46149	8.42528	6.18721	7.44998	7.27898	7.01416	6.81952	7.6852	7.90073	7.60064	7.0152	7.89002	5.86236	5.5618	7.97397	7.5356	7.58153	7.04714	7.11987	7.54024	6.98832	7.36744	7.56122	7.96642	6.56118	6.57895	7.96892	7.05533
SET|6418	7.36855	7.90071	7.46971	8.17434	8.22451	8.07453	8.79249	7.6285	8.30959	7.76172	7.96521	7.87803	9.13274	8.25682	7.0429	7.87777	8.54292	8.66795	7.74718	7.77012	7.93396	7.15152	7.93196	9.09187	7.30328	8.56236	8.91208	6.8012	8.01098	8.59861	8.21561	7.83964	8.27783	8.05069	6.94133	7.89932	7.82878	8.45539	9.31983	8.49471	8.05435	7.85921	7.51	7.73709	8.26073	8.41932	7.80203	7.59346	7.51439
FAM134A|79137	5.19961	6.11533	6.11326	6.03065	5.93676	6.00546	6.25647	5.30514	6.17014	5.40279	6.75103	5.74735	6.43076	6.29806	6.64809	6.085	6.21377	5.28731	6.00638	6.40654	5.44436	6.29556	6.00499	6.11275	6.31619	5.23348	5.94795	6.04686	6.8165	5.65809	5.97345	5.73965	5.83766	5.29976	6.19968	7.10189	5.7911	6.51572	6.29886	6.19502	6.44225	6.31613	5.87809	6.38186	6.35418	6.11483	6.52141	5.76348	5.73023
SLC39A1|27173	6.57931	6.93921	8.46165	7.76638	7.40099	7.3368	7.57468	7.60281	7.87698	7.00875	7.20688	7.13028	7.76262	6.86289	6.79066	7.42925	7.24237	7.79578	7.58055	8.0772	6.75744	7.70944	7.54352	7.24722	7.02949	6.86868	6.70056	6.56018	8.3896	7.56169	6.62164	7.79686	7.40402	7.21826	6.81399	7.47308	6.94008	7.65641	7.9067	7.83073	7.53434	7.39899	7.28666	6.53888	6.75523	6.49637	7.17179	7.18634	7.25954
MTMR14|64419	4.87537	4.64565	5.34357	5.31973	4.9004	4.46524	5.1053	5.12673	5.18792	4.83888	5.28945	4.76115	5.05832	5.79086	4.57911	5.68794	5.4442	5.11799	5.65377	5.44257	5.04178	4.89057	4.32021	5.96673	5.18772	5.10755	4.73968	4.9979	5.43218	5.17246	5.694	4.76839	5.04458	5.03551	5.33692	4.73491	4.61017	4.65043	5.33012	4.87489	4.54856	5.95967	5.43434	5.86168	4.57224	5.23273	4.96091	4.97023	5.41774
SLC25A11|8402	4.77128	5.39492	5.166	6.06816	5.33576	6.20637	5.30368	5.2072	5.45559	5.41714	5.81725	5.15388	5.38499	6.33608	5.996	5.28371	5.37524	5.03218	5.96179	5.27758	5.78481	5.12966	5.39368	5.34506	5.49597	5.86158	5.61164	5.24029	5.9524	5.8628	5.41713	5.53601	5.84221	4.87649	5.68957	5.4509	5.43119	5.61863	6.03002	5.5548	5.58742	5.77399	6.26286	5.67964	5.67842	5.49397	6.04123	5.88035	5.69459
EIF2S3|1968	6.44526	7.0261	7.50751	8.00111	6.66474	8.43195	7.31553	6.76866	6.6055	6.02822	7.24047	7.17693	7.14747	7.40605	7.66847	7.5535	7.62897	7.8219	7.89432	7.0799	7.1122	7.53609	7.40506	7.68937	6.39705	6.82965	7.61116	6.98885	7.17892	7.52227	7.1656	6.68454	7.17567	7.64789	6.94829	7.01086	9.31825	7.60787	7.0846	7.52453	6.99512	7.63422	6.87416	6.91844	7.64011	7.25247	6.83297	6.60748	6.99912
GPX1|2876	7.69367	7.86685	8.09126	8.8734	8.36866	7.82734	8.22634	9.12064	8.46391	8.09584	7.79805	7.84649	7.70217	8.53572	8.41341	8.17434	8.33054	7.821	8.72156	8.35743	8.4257	8.02767	8.31629	7.21363	8.83756	8.60022	6.59089	7.80345	7.06118	8.74831	8.28361	7.98018	8.95915	7.35887	6.43055	8.10813	7.94412	8.17365	8.72956	8.00934	8.18796	7.9429	8.14894	8.97101	7.05273	7.66761	8.26314	8.23714	8.14671
NOL7|51406	5.67053	5.95288	5.92735	5.92593	6.28821	6.8883	6.3935	6.17957	6.74202	6.1566	6.24056	6.54725	6.20078	6.61603	6.36177	6.14496	6.32337	5.85513	6.69944	6.59978	6.39948	6.05009	6.21992	6.46501	6.56362	6.77658	7.63588	5.83698	6.12071	6.12325	6.21407	6.2681	6.61365	6.01393	6.25696	5.92314	6.73052	7.19964	6.25215	6.296	6.05582	6.70642	6.39697	5.91724	6.70625	6.55976	6.41589	6.32739	7.95063
MRPL34|64981	5.21274	5.49732	4.94403	5.48249	5.23553	4.85482	6.15951	5.88455	5.63799	6.01332	5.54523	5.28703	5.35043	5.62268	5.95944	5.07591	5.50858	5.96918	5.80003	6.03749	5.6768	5.0602	4.7173	5.95221	5.3776	6.2208	4.97863	5.90559	5.31478	5.74274	5.70844	5.20504	5.68783	5.10049	5.65148	5.56054	5.56662	5.00385	5.78534	5.44775	5.10285	5.1847	5.90678	6.43006	6.05111	6.16919	5.80548	5.88935	5.42941
MFF|56947	5.37628	6.01143	5.51315	5.86122	5.91007	5.22782	6.00321	5.00458	4.81391	5.16639	6.30148	5.39743	6.19306	5.71324	6.11422	5.54679	6.08323	5.24851	5.95305	6.0397	5.05601	5.81446	6.60024	5.06652	5.19656	5.62256	5.79648	6.82937	6.65416	5.7005	6.43608	5.80128	5.47735	5.40184	6.31679	6.15523	5.63097	6.7539	6.23386	5.92873	5.52507	6.19091	6.71807	6.05264	5.19301	5.95215	5.6149	5.729	5.71049
UBE2D2|7322	5.5221	5.99276	5.43234	5.55508	5.98797	5.47218	6.25846	5.69035	5.13252	5.51336	6.34186	6.70925	5.99978	5.89823	6.07852	5.53345	6.05805	5.34802	5.99988	6.11347	5.90984	5.74998	5.67744	5.73124	5.77909	5.99311	6.56947	5.31463	5.79919	5.90525	5.7642	5.80935	6.40445	6.29577	5.29032	6.0271	6.1875	5.84363	5.95717	6.1412	6.09758	5.62689	5.49195	5.49512	5.57731	6.47104	5.4788	5.93634	5.54523
MAPKAP1|79109	5.52496	5.93056	5.40771	5.72734	5.51789	6.41967	6.38403	5.71879	5.78132	5.11997	5.80142	5.54148	5.77213	5.35228	5.18331	5.93004	5.96679	6.11321	5.63503	5.71781	5.1578	5.49208	6.0303	6.08569	4.89719	5.68986	5.89041	5.12628	6.25631	6.27951	6.09634	6.22207	5.47169	5.46523	5.21426	6.17576	5.69895	5.82311	6.63986	5.82128	5.82286	5.55245	5.33809	6.39157	5.45975	5.57764	5.37439	5.66217	5.901
GPS2|2874	5.4414	5.66707	5.5872	5.20544	5.68446	6.06126	5.18795	6.18323	5.34593	5.41095	5.4865	5.72026	5.58474	5.79238	5.99909	5.76354	5.45834	5.78229	6.76067	5.60627	5.66292	5.18852	5.07472	5.33123	6.43614	6.07542	5.70699	5.25024	5.94333	5.1125	5.80831	6.10197	6.07731	5.31391	5.79055	5.57511	5.65324	5.60666	6.44469	5.96477	5.38531	5.94513	6.27649	5.61034	5.44543	5.82683	5.15306	5.92026	5.2679
CETN2|1069	6.49604	6.996	6.64855	6.64751	5.93866	7.12965	8.52985	7.33674	6.85685	7.19841	7.67795	7.56988	7.0801	6.75057	7.20076	7.59911	6.22329	8.06111	7.81162	8.03981	6.99082	7.13421	7.03846	7.08542	8.54511	7.29485	7.18627	6.39051	7.91154	6.53853	7.58953	6.57451	7.3251	7.38416	7.53688	6.69975	7.08963	7.52931	7.3987	7.68856	7.40776	7.35448	6.79678	7.15487	7.00849	6.97896	6.83376	7.08086	7.0197
TIMM9|26520	4.92025	5.48345	5.40736	5.39333	5.83311	5.70645	5.55568	5.51861	5.69068	5.02226	5.17255	6.33537	5.58205	6.14264	5.58574	5.62896	5.55417	4.73141	5.81336	5.15968	5.45792	5.72007	5.89864	6.0854	5.57736	5.98517	5.90576	5.48075	4.72014	5.02415	5.50597	4.61445	5.90604	5.93503	5.80549	5.14789	5.80603	5.13252	5.55716	5.59317	5.72032	5.7641	5.25919	4.40203	5.70147	5.59178	5.62323	4.89585	4.56851
TRA2B|6434	5.06883	5.86272	5.56652	5.6466	5.8314	5.86151	6.1928	5.18062	5.48366	5.26721	5.99137	5.64912	6.16651	6.25246	5.61339	6.05109	6.60258	5.92334	5.31932	6.0539	5.6952	5.45705	5.39115	5.71235	5.27657	6.1277	5.73218	5.47581	6.20499	6.23035	5.88208	5.36368	6.30319	5.97323	5.09461	5.69173	5.9718	6.11611	5.62121	5.91481	5.58473	5.76469	5.86236	5.33792	6.29884	6.49396	5.54713	5.65377	5.78003
NDUFA11|126328	6.31467	7.20427	7.51843	7.08311	6.66145	7.22991	7.9883	7.78357	7.47447	7.96254	7.321	7.28183	7.20369	7.19612	7.19302	6.97159	6.66486	6.63238	7.24074	6.43495	7.58388	6.30364	6.89121	7.07572	6.98358	7.45901	6.77218	7.64616	7.22922	7.63042	6.96327	7.32659	7.64951	6.82312	7.11132	6.93449	6.68037	6.74983	7.39628	7.21394	6.86207	6.73822	7.38457	9.05034	6.55889	6.83028	7.12289	7.31562	7.61565
SBDS|51119	5.86858	6.11779	5.6013	7.20186	6.62192	6.25029	7.18702	6.04651	6.65023	6.27249	6.46351	5.99238	6.29735	6.89119	7.26841	5.51943	7.10314	7.14368	6.85563	7.113	6.41185	6.57799	6.26163	7.32773	6.01654	6.53622	6.50304	6.5937	7.04949	6.48149	6.57787	6.20966	6.11621	6.98597	7.23192	6.96234	6.53922	6.78611	6.62714	6.76396	6.73769	6.89172	6.93605	6.45754	6.82896	5.99737	5.82637	7.12539	6.37387
IDH3B|3420	5.4175	6.42954	5.94229	6.36513	6.38184	6.07093	5.98935	6.31776	5.61309	6.39378	6.57301	5.84401	6.45792	5.93159	6.90951	5.99137	5.98692	5.16975	7.14276	6.7204	6.44737	6.11864	5.65099	6.69016	5.92103	6.58346	6.52687	5.6766	6.06883	5.86964	6.55928	6.72426	6.62363	5.08059	6.43838	7.04752	6.30792	6.57802	6.59538	6.97088	6.68926	6.20444	6.72576	6.32078	5.1066	6.60759	6.03632	5.98764	6.43448
TMEM111|55831	6.54165	6.10888	6.68336	7.13595	6.49081	6.49765	7.45678	6.52236	6.65243	6.95478	7.06353	6.45395	7.31507	7.24232	7.17064	7.35522	7.14043	6.70787	6.73846	7.41152	6.68383	6.96188	6.02763	8.01126	7.12683	6.60623	6.1201	7.28517	7.03667	6.83265	7.10106	5.68646	6.4846	7.78411	7.93118	6.41631	6.50577	6.34199	6.57945	6.62104	6.50026	7.79488	7.48322	7.82269	6.27829	6.53642	6.10111	6.54963	6.80172
YTHDF2|51441	5.99421	6.47253	6.5098	6.22345	5.94102	5.9211	6.34714	5.896	5.26648	5.6443	6.4216	6.38699	6.48469	5.6361	5.66851	5.31014	6.08606	5.54639	5.79322	6.41109	5.96255	6.13472	6.01247	6.36165	5.24302	6.32963	6.84493	5.76228	6.12849	6.00998	6.24868	5.79235	6.45423	7.40781	5.39808	6.0065	5.57501	6.00459	5.98691	6.0727	6.116	6.41807	6.34171	5.88906	5.36787	6.50869	5.7697	5.68788	5.74751
STOML2|30968	6.44413	6.93674	6.95745	6.80382	6.87852	6.42018	6.48324	6.71728	6.98871	5.96853	6.31743	7.81668	6.93155	7.21461	7.04394	6.69007	6.7969	6.4397	8.15323	5.95767	6.69502	7.24305	7.16435	6.16112	6.97757	7.26213	6.95737	6.78225	6.12532	6.82367	7.02551	6.33655	7.63787	5.39363	6.63203	6.96731	7.01218	6.65554	8.03441	7.0472	6.37955	6.97848	5.7477	6.68698	6.30132	6.76003	6.93061	6.79061	6.13957
SLC3A2|6520	6.08394	6.84047	6.68882	7.4862	7.60983	7.12906	6.47939	7.25762	7.25349	7.02454	6.98323	6.40284	6.95398	7.60803	5.91984	7.07142	6.74825	7.20722	8.77549	7.14333	7.47551	7.89219	8.1216	7.97103	6.50788	6.73419	7.31061	8.12918	7.00552	6.54998	7.14054	7.09271	6.85109	6.83531	8.04918	7.10245	7.86277	7.91676	7.45497	8.53832	7.48194	7.22483	8.03664	6.91658	7.67929	6.91575	7.2127	7.65164	7.89353
ARF4|378	8.8935	7.95352	7.95214	8.73959	8.14269	7.78281	8.66161	8.2759	7.98289	8.0728	8.75217	9.47825	7.86902	7.25563	9.20023	8.22673	8.77799	7.96857	8.26326	8.09091	8.10821	8.96817	7.52937	7.61797	8.02532	7.98208	8.22145	8.5162	8.74309	8.1498	8.92305	8.11859	8.47553	9.43048	8.64486	9.05797	8.60931	8.70642	7.85681	8.02223	8.10626	8.68426	8.7074	7.8646	8.857	8.42099	7.48019	8.59072	8.24425
GPBP1|65056	5.79133	6.29964	5.83327	5.67751	6.76456	6.41672	6.06842	5.90923	4.95376	5.55617	5.91773	6.33069	6.68379	6.41566	5.8876	5.91138	5.5643	5.5915	6.49238	6.0043	5.69655	6.07418	6.14033	6.2321	5.7401	6.23049	6.9437	5.1197	6.29011	6.37314	5.98599	5.75566	5.72796	5.95771	5.46241	5.70576	5.35451	6.05929	5.78031	6.31517	6.43188	5.44695	5.92089	5.95088	5.52307	6.50877	5.66972	6.0496	5.56015
SRP9|6726	9.55863	8.40699	7.48741	8.64625	8.23509	9.16171	9.17499	8.46093	8.42243	8.69978	9.20274	8.98752	9.37293	8.85011	9.066	8.41115	9.17571	8.8046	7.70171	8.3373	8.1599	9.19987	8.15892	8.45215	8.15666	9.01855	9.26892	8.15257	8.54088	9.15027	7.98231	8.3622	8.16816	9.63781	8.78608	8.2151	8.78417	9.20365	9.23855	8.643	8.84485	8.82632	8.15729	7.88773	8.40008	8.95408	8.42476	8.47132	7.82666
MAT2A|4144	6.89857	7.96672	6.90336	6.75579	7.91607	7.78124	6.64999	6.22993	7.2841	6.15419	6.80238	6.25673	7.5192	7.55149	7.17913	7.73415	7.33055	7.02952	6.96183	7.29935	6.34685	6.641	6.87153	7.34954	6.36816	7.03182	7.78872	6.48518	7.19966	7.40672	7.44854	7.25918	7.63258	7.5596	7.47695	8.11726	6.3616	6.86514	6.64326	6.93372	7.04288	6.48998	7.21929	6.95419	6.92883	7.68841	6.44134	7.14554	7.43296
NDUFA3|4696	8.1149	7.76994	8.35218	7.27366	7.39611	8.75463	7.99671	9.09931	8.30717	9.39383	8.19772	8.11874	8.43691	7.83068	8.70897	8.27814	8.05422	7.4383	8.22896	7.25261	9.52136	7.11578	7.93726	7.50239	9.03384	8.08744	7.98379	8.20999	8.46154	8.37513	7.59496	8.06343	7.81081	8.25073	8.48426	7.02321	7.6255	7.56925	7.9452	7.98701	8.54962	7.47024	8.16348	9.12416	6.20515	7.49021	8.70261	8.23344	7.7753
C15orf24|56851	5.72545	5.78668	5.91793	6.37749	6.72905	6.55589	7.23792	6.43922	6.58035	7.25129	6.78598	7.014	6.64513	6.81542	7.29287	5.17673	5.95835	5.76831	7.24695	6.85318	5.80392	6.33546	5.91274	6.6502	6.68586	6.12843	6.41311	7.49803	6.33054	7.10043	6.62432	6.79245	6.26756	7.11929	6.24343	6.36553	7.22656	6.92543	6.80166	6.28973	6.43282	6.32062	7.35803	7.41512	6.14041	6.14129	5.91357	6.78508	6.50191
ARCN1|372	7.06663	7.55717	6.88625	7.15555	6.82117	6.8967	6.77663	7.08489	7.68931	6.90576	7.46472	7.42242	7.10476	6.71288	7.03032	7.7911	7.85768	7.55059	7.49684	7.03739	7.52372	7.98876	7.09235	6.7009	7.22479	7.26858	7.27996	6.87927	6.66924	7.17304	7.67166	7.13565	7.17783	7.85085	8.17446	8.12475	7.89602	8.03004	7.11111	7.03827	7.0262	8.19829	8.28264	7.24589	7.52639	7.56854	6.62779	7.07746	6.49688
ACTN4|81	7.8587	8.10143	7.39911	7.5813	6.9672	7.91809	8.8599	7.70545	8.14807	7.49648	7.80283	7.1167	8.23518	7.57537	7.88113	8.03656	7.99851	8.1209	8.26222	7.51733	8.04443	7.1215	7.79688	7.81189	8.27962	7.589	8.16923	6.94744	7.94197	9.63041	6.87196	8.31335	8.88223	7.22186	7.11137	7.27732	7.90152	7.64548	7.97507	8.26096	8.37503	7.77176	7.73589	8.33012	9.3959	9.69135	7.57579	8.60278	7.99844
NAA20|51126	6.08137	6.57493	6.47139	7.59865	6.93584	6.46829	6.21795	8.16923	7.56473	7.13758	6.62375	6.73685	7.02301	7.0068	7.60408	6.91349	7.04155	7.18491	7.19166	7.44974	6.74939	6.93705	7.74299	7.6413	7.10265	7.00518	7.10158	6.57999	7.26587	6.81528	7.13688	6.17194	6.96484	7.55261	7.81377	7.16529	6.47089	7.13796	5.81789	7.68316	7.89174	7.14735	6.91776	6.3916	6.28049	6.83235	6.20002	6.38508	7.00729
EIF4A2|1974	8.16501	7.5475	8.2516	8.09254	8.87094	9.86886	8.10272	8.61344	8.14034	7.11399	8.12048	8.03078	7.97157	8.56322	7.04269	8.81335	8.77869	8.36843	7.62409	7.81537	7.99247	7.2708	7.1494	7.60147	7.2328	8.22737	7.7897	7.381	7.98484	8.4569	8.41115	7.5276	8.23849	8.70947	7.82385	7.62539	8.18076	8.60468	7.90753	8.05817	7.81942	7.40816	7.90498	7.43757	9.19405	8.66397	7.82273	7.36092	8.2395
PTTG1IP|754	8.01223	8.20855	7.43262	7.41334	7.37678	7.20097	8.07985	7.93007	7.78599	8.40164	8.74164	7.48159	7.97282	7.16008	8.85621	7.78888	7.98672	8.01548	8.90462	7.7184	7.61903	8.33167	9.84562	6.68737	7.64289	7.49464	8.13227	7.58059	8.61959	8.42268	8.16866	6.62407	8.59933	8.22455	7.40209	8.00332	7.89784	8.60792	8.06674	7.85227	8.65248	8.07543	8.12215	8.2102	8.18957	7.64693	6.9185	9.20379	8.10848
C19orf10|56005	6.23126	7.03563	7.09916	6.6135	6.58495	6.69433	7.96286	7.12441	7.42316	6.74019	7.27801	7.59037	7.09141	6.82497	8.651	6.36429	7.18491	8.17568	7.53018	6.42245	6.9593	6.65549	6.93715	6.59665	6.54118	7.34434	5.48744	7.83287	6.85571	6.91065	6.94684	7.43387	7.44807	5.72608	7.07473	7.58694	6.89464	7.32662	7.07609	7.33355	6.83364	7.26515	7.36237	7.84385	7.05392	6.77543	6.998	6.93472	7.19902
EMD|2010	5.5761	6.07957	5.68832	5.98462	5.45054	6.66972	7.38433	6.3185	5.77874	6.13513	6.23825	6.56548	5.96587	5.98437	6.23144	6.02821	5.5549	7.04916	7.28153	6.98486	6.43221	5.96251	5.95758	6.03558	6.08145	6.6735	6.30198	6.05063	7.44292	6.00178	6.35314	6.09566	6.50095	5.84776	6.2836	6.47353	6.41998	6.42948	5.69339	6.60384	6.17328	6.50855	5.77473	7.20431	6.07654	6.50649	6.23398	6.24144	6.00991
ARPC5L|81873	5.88495	6.4174	6.45946	7.1571	6.2285	7.16087	7.5266	6.75869	6.78284	6.32213	7.29062	7.07889	6.3573	6.52703	5.97273	6.66575	7.21562	7.51866	6.3021	7.01257	6.02237	6.93933	6.89392	7.35302	6.02824	6.97056	6.741	6.10328	7.68897	7.13532	7.06477	8.27713	6.27501	6.04803	5.55241	6.74004	6.81006	7.5142	7.59149	6.36929	6.74276	6.289	7.06096	6.9836	6.61964	6.53404	6.61578	6.38728	7.21076
PSME1|5720	7.96615	8.8828	8.7116	8.26838	8.39417	8.631	8.17992	9.2764	7.59843	8.41362	7.84279	9.51895	8.44291	8.91276	8.06987	7.97272	7.87069	7.71145	7.97803	7.69914	8.75443	7.92721	7.16864	7.5172	9.48527	8.92465	8.0119	8.56042	8.18523	8.37492	8.38177	7.94964	8.60417	7.29459	7.74345	8.28543	7.81236	7.9392	9.2867	8.38201	8.47734	7.44885	8.11249	7.53838	8.46639	9.21725	8.39374	8.26224	8.1558
TADA3|10474	5.89046	5.76679	6.41166	5.78504	5.77914	5.79448	6.24536	6.20525	5.92607	5.70013	6.40324	6.15326	6.68093	5.99743	5.6977	7.18375	6.09206	6.70953	5.6638	7.08018	6.3055	6.05213	5.3841	6.84459	6.05446	6.67168	5.20694	6.09327	5.54238	5.8577	6.18443	6.04518	6.23825	5.27522	5.31241	5.83951	5.80056	6.06913	6.5465	5.62618	6.05387	6.62537	6.67831	7.35248	6.64135	5.60402	5.56257	6.35682	6.36461
TFIP11|24144	5.09668	5.33493	5.25431	4.85524	4.80469	5.62187	5.57594	5.28281	5.04714	4.9482	4.84912	4.89108	5.58888	4.98762	5.25251	5.58635	5.73839	4.71761	5.73626	4.81038	5.37762	5.41351	5.10166	5.47978	4.76742	5.39244	5.10708	5.28349	5.28997	5.05637	5.14715	4.77153	5.14365	4.55659	5.22734	4.95115	5.22135	4.79228	4.96785	5.14558	6.39584	5.11648	5.40952	4.61932	4.80688	4.86928	5.23967	5.02176	5.74323
PDAP1|11333	5.51823	6.29333	6.10787	6.10324	5.24224	6.28234	6.57855	6.3348	6.49171	6.2591	6.1597	6.09396	6.28466	5.89723	6.42355	5.48783	6.36665	5.79596	6.34292	6.53516	6.49796	5.59244	6.28932	6.68219	5.87575	6.73937	5.68782	5.82031	6.45729	5.76683	5.98555	6.50855	6.31809	4.68229	5.52982	6.92686	6.36402	6.98305	6.68047	6.39667	6.17183	6.0738	5.5346	6.9323	6.52601	5.71656	6.3027	6.61507	6.60755
TCEB1|6921	6.76729	6.37488	6.29559	7.6901	7.96335	7.34076	6.97033	7.35103	7.24548	7.38043	7.05098	6.44449	6.67732	5.77652	7.18019	6.79559	6.44333	6.05487	6.55199	6.8782	7.07523	7.37403	7.76806	7.57653	7.42359	7.3689	7.31843	7.3785	7.15247	8.28319	7.6535	7.10352	6.94112	7.21527	7.61163	7.37199	6.96386	7.03342	5.51395	7.17107	7.03159	7.5808	6.35239	6.48209	7.82152	7.69354	6.75429	7.01144	7.26474
SF3B4|10262	6.72011	6.57233	7.72092	6.57727	7.60156	7.97176	6.68059	8.23771	6.96523	6.95573	6.70925	7.08324	7.61302	7.14487	6.88154	7.31119	7.63886	8.08429	8.1395	8.31788	7.05388	7.46782	7.16325	6.85366	7.40151	7.14082	7.78874	6.87403	6.229	6.91819	7.12419	7.32596	7.71209	7.53105	6.42585	6.26345	7.1537	7.28855	6.73078	7.01913	6.85304	7.3422	6.55412	6.94663	6.60741	7.22146	7.29874	6.9611	6.74196
MAPRE1|22919	6.6282	7.37713	6.29572	6.96471	6.70277	6.5766	7.20396	5.96754	6.27493	6.81455	6.75814	5.63554	6.78148	7.25196	6.65609	7.05132	6.82687	7.13744	7.03265	7.00974	7.11573	6.91432	6.83428	7.05017	6.14594	6.77581	7.54438	6.2653	7.16672	6.59344	7.23445	6.4655	7.7345	7.20927	7.46244	7.02854	7.50976	7.4762	7.13132	7.63392	6.61646	7.38567	7.00554	6.3836	7.20503	7.73842	6.65662	6.65216	7.32211
C1orf144|26099	5.82608	6.64565	5.49867	6.15016	5.95159	6.44535	6.8001	6.21454	5.47395	5.98847	6.73396	6.56499	6.52134	5.76837	5.58289	5.52162	6.24342	5.75663	6.11092	6.58992	6.4383	5.79728	6.25757	6.26571	5.41772	6.60628	6.11848	5.72787	6.62758	6.0297	5.97653	5.79841	6.73343	5.25452	5.59118	6.0068	5.82503	6.29784	7.0216	5.9691	6.24731	6.30487	5.97731	6.00332	5.57161	6.31322	5.99255	6.39414	5.57128
GDI1|2664	6.636	6.87388	6.80807	6.56649	6.60438	7.79417	7.97886	7.11698	5.966	7.27879	7.18103	7.31547	7.19265	6.84525	6.51951	7.08926	6.0934	7.28511	8.10003	7.67776	6.81167	6.70005	6.65757	7.08487	7.30615	7.57824	7.84899	6.59288	8.31218	7.12124	6.98097	6.99081	7.01177	7.46359	6.21939	6.83878	6.20904	7.28667	7.07899	7.42697	7.23994	6.81789	6.58463	7.6269	6.29617	7.59517	6.80577	6.70076	6.95348
WDR1|9948	6.70665	7.56941	7.43557	7.71129	7.03756	7.03806	7.56251	6.2895	6.56546	6.73923	7.81875	7.04966	7.99281	7.36963	7.4828	6.89577	6.69119	7.93862	6.74841	7.33536	7.8334	6.80253	6.73984	7.63594	6.47733	6.8231	6.46753	7.00409	8.31835	6.88227	6.81321	7.72267	7.40303	6.47091	6.8448	7.46129	7.54236	8.26563	6.91858	7.5624	8.05423	7.39609	7.70904	7.26754	8.11728	7.00015	7.30727	8.0389	6.94406
ATXN2L|11273	5.49228	5.87266	5.73971	6.10314	5.92562	6.04284	5.79919	5.75455	5.56436	5.38452	5.83457	6.43696	5.69778	5.58028	4.80131	5.50553	5.68964	6.50747	6.45466	5.65205	5.74228	5.61157	5.79122	6.00249	5.91043	6.26353	6.26508	5.72041	6.92425	5.84073	5.86043	7.06799	6.35051	5.62858	5.42035	6.11924	5.64814	6.51029	5.50292	6.04755	6.02587	5.84661	5.59843	5.60858	6.18387	5.59911	6.31656	5.62133	5.69227
MRPS16|51021	5.56137	6.27195	5.97988	7.1663	7.07913	6.23473	5.26802	5.89113	6.86755	6.41659	5.84499	6.08825	6.05098	5.54087	6.63492	6.22677	6.23264	5.49246	6.17433	5.98386	6.32857	6.20733	6.21532	6.31318	5.93013	6.56221	7.03009	5.79381	5.51521	5.71135	6.40668	6.38577	6.06472	6.22154	6.33344	5.83025	6.04633	6.20771	6.12209	6.1261	5.68692	6.19355	6.15829	5.88169	7.61321	5.77916	7.11774	5.72227	5.73584
PPCS|79717	6.31242	6.96314	6.96901	6.22747	6.17572	6.16582	7.23882	6.53189	6.23337	6.61429	7.1983	7.24831	6.67208	7.12915	6.00754	7.82383	6.50127	5.7419	6.22314	6.31354	6.50356	6.08041	6.55679	7.15019	6.37941	6.87626	6.48341	6.6326	7.09274	6.51593	7.63446	6.14366	6.90813	7.64831	6.89887	6.61253	7.96344	6.31363	6.7331	6.7005	6.76792	6.7019	7.62887	6.21861	6.29827	6.94921	7.08448	6.47615	5.9617
PDHB|5162	5.78554	5.49248	6.246	7.15853	6.25813	6.11298	5.69236	5.91869	5.57093	6.26183	6.44451	5.88722	5.91968	5.92183	6.03127	6.60727	6.55918	5.45607	6.19871	5.48897	6.03667	6.22743	5.28016	5.81437	6.59703	5.7354	6.37155	5.83977	6.34027	6.32539	6.41001	5.8137	6.22966	6.58395	6.33334	5.8472	5.8233	5.74307	6.53302	5.6803	5.84429	6.29161	6.6423	5.67786	5.94653	6.61355	5.59063	6.11301	6.66992
MGAT1|4245	6.3004	7.04258	6.43537	6.81192	6.36819	6.06663	6.35834	6.10356	6.55605	6.49092	7.09264	5.89242	6.26399	5.84266	6.7923	6.27538	6.02866	5.96228	6.54433	6.49041	6.49665	6.30814	6.52637	5.98749	6.16748	6.25518	6.14977	6.61183	6.76549	6.34423	6.31283	6.81417	6.66901	5.81212	6.69979	7.57141	6.33769	7.61354	6.00072	5.87004	6.70771	5.84198	6.50843	7.1828	6.45485	6.47245	6.72432	7.0792	6.4677
SRPRB|58477	6.36361	6.72026	6.05298	6.48114	6.67144	6.10951	8.23782	6.15968	6.21055	6.20771	6.21026	6.86289	6.48595	7.08468	7.19829	6.00487	6.00218	7.34076	6.46323	7.22561	6.13176	6.88744	6.41906	6.71831	5.90559	6.08557	6.33151	6.99227	6.32319	5.77684	6.80276	6.37701	6.79231	6.91073	6.91384	6.65904	7.08027	7.23061	6.61977	6.45182	5.73086	7.1346	7.38456	6.19914	7.43655	6.6523	6.53408	6.1402	6.26811
UBE2V1|7335	6.39902	9.47067	6.76984	7.40221	6.90567	7.85965	7.54787	7.73191	6.63093	7.03669	9.16176	7.41994	6.98527	7.49925	6.89431	7.20301	7.22003	6.98312	7.91573	7.17452	6.34784	7.31599	7.99319	7.68781	7.57085	7.39924	7.54728	6.62942	8.03167	6.92565	7.79641	8.26633	7.3863	7.6694	7.49738	7.10699	7.77917	7.23923	8.76546	7.79891	7.3823	7.19938	7.00381	7.08332	7.40858	6.80189	7.13363	6.78389	6.96771
TMEM147|10430	7.201	6.7363	7.26016	7.00312	7.4987	7.43399	7.57979	7.61615	8.51725	7.47557	7.29108	6.95975	7.32015	7.39143	8.42616	6.93266	7.12363	8.10512	8.21614	6.55772	7.38573	6.54034	8.02038	6.95181	6.50432	6.58013	8.26713	7.36835	7.54152	9.56883	7.30721	7.46174	7.2906	7.9692	8.54296	6.28642	6.80297	7.33914	7.50034	7.4459	7.46125	7.38636	7.70161	6.79012	7.15588	7.17734	7.46725	6.8621	7.71045
MAZ|4150	6.47466	8.54989	7.27313	6.96036	7.46853	7.36136	7.98067	8.2072	7.313	8.07015	7.81957	8.45305	7.88518	9.0945	6.82358	7.35316	8.21283	7.74674	7.27232	7.515	8.43355	7.20184	8.46717	8.03932	8.34071	8.35904	7.70983	7.64893	7.25884	7.38712	7.57473	8.78684	7.68022	6.67378	5.86233	7.52474	8.02536	7.82282	8.25882	7.68141	7.65863	7.3115	7.56068	8.45247	7.45023	6.79027	8.87444	8.46794	6.8851
NDUFB11|54539	6.27829	6.77513	6.7212	6.61481	6.19651	7.28457	7.69135	7.29001	7.44244	7.67624	7.29198	7.90416	6.79543	6.85624	7.61363	6.37027	7.13217	7.07213	7.39665	6.63484	7.20811	6.62227	7.02236	6.70622	6.91095	7.1349	7.59641	7.27289	7.49103	7.10218	6.87792	7.47613	7.25315	6.96493	6.69347	6.75747	6.76173	6.89736	6.68764	7.01065	6.85354	7.07051	6.68098	7.52962	5.74923	6.31809	7.47077	6.70028	7.54811
TIMP1|7076	8.48173	8.58969	9.09832	8.53198	8.87657	8.90917	9.5431	8.96734	8.68022	9.50868	9.77959	9.0386	9.31092	7.81914	9.1123	8.42915	9.14805	9.49733	8.32958	8.88042	8.76952	8.46229	8.65611	8.55282	9.54915	8.76239	7.82112	10.0835	9.1419	8.61992	8.59422	9.36569	10.5153	9.11966	8.46879	7.63685	9.24703	9.3314	8.97622	8.57728	9.50668	9.71695	7.9695	9.23225	8.02062	8.1288	9.80861	9.62585	7.95767
LSM2|57819	5.60933	6.25852	6.14263	6.05014	6.3835	6.58319	6.66022	6.75073	6.78181	6.73773	6.52022	6.83013	6.11082	6.49141	6.00293	6.23561	6.73929	6.12349	6.00432	6.65486	6.60088	6.24069	7.02644	6.41535	6.36439	7.37992	7.12941	5.91036	6.52688	6.09925	6.89678	6.13137	7.21474	6.15095	5.46723	6.69863	7.05377	6.65435	6.21639	7.00307	5.96919	6.80716	5.64326	6.57011	6.18473	6.63338	7.07955	6.25595	5.40941
SLC44A2|57153	7.31286	7.59929	7.02224	6.9753	7.03409	6.90563	7.56153	6.82353	6.60621	6.75934	7.33809	6.59823	7.51872	7.76638	7.36175	7.09462	5.82126	8.91229	6.92392	8.08978	7.25902	6.51958	7.29074	7.10225	6.97888	6.22296	7.20587	5.9423	7.3805	7.92749	6.88314	6.7985	7.05725	8.41265	7.07172	7.38232	6.16329	6.58792	7.0521	7.63936	7.25903	6.80741	8.56047	7.37368	6.46604	6.10806	6.90002	7.42372	7.76806
CINP|51550	4.70081	4.90897	5.28328	4.54524	5.0974	5.55935	5.10292	5.4634	5.06139	5.92687	5.11664	5.82728	5.53205	5.73909	6.01771	5.42693	5.62703	5.43071	5.58394	5.99544	5.43097	5.38851	5.03791	5.6493	6.1104	5.76993	5.15831	5.16169	5.55007	4.92945	4.94221	4.73855	4.91999	5.25987	5.41108	4.74715	5.20844	4.96604	5.7914	5.21818	5.35727	5.30151	5.14785	4.86592	5.94251	5.12479	5.20969	4.90804	4.19806
BCL2L1|598	6.40708	7.50606	6.42563	6.39536	5.9027	6.43827	6.62937	6.07251	5.90169	6.11137	6.07279	6.46515	6.70821	6.08667	7.11904	7.05026	5.41587	6.10587	6.59678	7.26394	5.35572	6.4725	6.83543	6.48678	7.13188	6.06553	6.90248	5.7739	6.84727	6.42199	6.59544	6.6409	6.745	6.97962	6.63546	7.12384	5.9905	6.1647	6.23446	7.12253	6.64626	6.28457	6.90303	6.88672	5.65629	7.08025	6.52174	6.5189	6.6759
PPIE|10450	4.97724	5.3714	5.96765	5.62392	5.18784	5.4187	6.24016	5.69745	5.15786	5.54637	5.92984	5.99032	5.60064	5.89923	4.80471	6.57235	5.7682	5.12273	6.00896	5.73382	5.82054	4.92539	5.49466	5.93119	5.35479	6.37594	5.55241	5.09439	6.04927	5.52822	5.42726	5.71522	5.97234	6.10098	4.68641	5.90927	5.96597	5.2829	6.91121	5.41892	6.12566	5.2307	5.80389	5.97299	5.40963	5.73957	6.12938	5.71693	5.20744
NUDC|10726	6.5077	7.44438	6.39976	6.62076	6.14573	7.68631	7.89364	7.72855	6.49068	7.3037	7.23614	7.78167	7.02426	6.2411	6.21164	6.96014	7.14965	7.09376	7.17958	7.42595	7.75388	6.40572	7.28019	7.67367	7.85205	7.7804	6.37634	6.99493	7.45985	7.22906	7.03714	7.8193	7.75902	4.92855	5.66163	7.09705	6.83336	6.9473	8.15266	6.85611	7.12572	6.76153	8.01989	7.71832	7.09336	6.69955	6.38794	7.09779	6.94617
HNRNPUL2|221092	5.94066	6.93423	6.07545	6.64218	6.382	6.59801	6.002	5.8511	6.58375	5.96148	6.71427	5.79037	6.5435	5.97381	5.99431	6.59777	5.96321	6.79291	7.01804	7.05569	6.86668	6.4935	7.46222	6.81312	6.14365	6.30976	5.76852	6.15714	5.63732	6.36091	6.57638	5.58724	7.06599	5.46682	6.54296	6.297	7.09812	6.98744	7.21379	7.55406	6.31079	6.24525	6.70432	6.09952	7.27639	6.73606	6.8933	6.39479	7.00704
TBC1D9B|23061	5.82482	6.47231	6.24307	6.51846	5.55946	6.82811	6.21078	5.8088	5.57856	5.6771	6.73167	6.07004	6.55761	6.42765	6.02366	6.1793	5.76246	5.78363	6.45187	6.31411	6.36139	6.17686	5.84972	6.24005	5.84174	5.57704	6.19353	5.4432	6.67465	5.7908	5.77024	6.05522	6.21763	5.67946	6.46291	6.57075	6.20158	7.87711	5.98956	6.15553	6.42186	5.77933	6.77879	6.41767	5.45561	5.91318	6.01456	6.25938	6.02115
LMAN2|10960	6.94977	8.05822	8.00925	7.00114	6.29366	6.97975	8.06149	7.46623	7.29746	7.3214	8.40052	7.47482	7.9266	6.74363	7.9541	6.7102	6.88483	6.81653	7.61574	7.67332	6.97876	7.02768	7.59803	6.92611	6.9923	6.83938	7.15444	7.06924	7.54033	7.17966	6.8564	7.32771	8.49006	7.11613	7.31211	7.24238	7.77747	8.81467	7.53888	7.2815	8.1948	6.44498	8.59266	7.87955	6.50976	7.05664	7.24514	7.55611	7.28489
RPL18A|6142	8.65338	8.82468	8.88431	8.11683	9.24205	9.08587	8.8113	8.80517	8.75255	8.68061	8.06069	8.75764	7.93943	8.51111	8.06045	8.47803	8.83848	8.10957	7.99859	8.89115	9.00151	9.10801	8.18141	8.54511	7.27193	8.78224	7.3998	8.93389	7.06575	8.69107	8.18553	7.87239	7.52349	7.62881	7.7651	7.66648	8.70958	7.12633	8.63652	8.75386	7.4942	7.89691	8.11324	9.30249	8.4477	8.27473	8.57224	8.61897	8.03667
RSL24D1|51187	6.49001	6.28163	6.72217	7.04769	7.45118	6.68404	7.90671	6.53681	7.00182	6.66066	6.92715	7.4276	7.63542	6.98525	7.72467	5.73747	6.63461	6.49744	7.11433	6.60805	6.91708	7.45967	6.42137	7.70698	6.83798	6.63678	7.52333	6.89067	6.34965	7.40008	7.20402	5.7223	6.16872	7.63673	6.0188	6.0273	6.65183	7.32282	6.44192	6.83839	6.81697	6.76976	6.42896	6.94562	6.68716	6.6772	6.14306	7.13716	6.54128
SNRPA|6626	5.94184	6.12243	6.29012	5.5695	6.0437	5.96453	5.97081	6.62714	6.23215	6.31286	5.8015	6.47823	6.20733	6.18549	5.52789	5.6327	6.10952	6.34419	5.81699	5.36885	6.59513	5.58593	6.61309	6.1687	6.21024	6.91194	6.35324	5.84653	6.46451	6.75197	6.15128	6.48995	6.79636	5.37021	5.23563	5.89917	5.99042	5.60381	6.58254	6.34979	5.83745	6.04118	6.02813	6.69181	5.77556	7.48977	6.58514	6.20324	6.1507
PDIA4|9601	7.17157	7.91645	7.6451	6.63013	6.69533	6.29927	7.71255	7.26999	6.27017	6.38857	7.07094	7.13292	7.23088	6.58801	7.2494	6.74007	6.97178	6.87458	7.55384	8.14711	6.73215	7.6065	6.8142	6.56584	6.23114	6.67113	7.20172	8.00979	7.38265	6.70885	7.82867	7.55439	8.00649	6.61026	7.91505	7.43403	7.7842	8.26479	8.69114	8.07679	7.73091	7.8066	7.26811	6.90195	7.37716	7.9508	7.4086	7.44733	6.8644
ENSA|2029	7.63344	8.21171	8.38072	8.06303	8.81246	10.0127	8.61253	8.96767	8.54596	8.3324	8.90077	8.61886	9.53928	8.99945	8.73619	8.82495	9.28756	8.77489	9.01042	10.095	8.09444	8.90899	8.72369	8.97786	8.8566	8.58487	8.35101	7.88304	9.2535	8.58124	8.1019	7.79847	8.31279	8.09994	7.49628	8.05694	8.74728	8.49379	7.70844	7.84504	9.08827	8.50131	8.48334	8.18792	7.61586	8.08622	8.7517	8.27978	7.68161
CIR1|9541	5.10914	5.66038	5.08302	5.04348	5.10857	5.24785	5.62542	6.28352	5.3218	5.39462	5.5869	5.22765	5.73561	5.34154	5.31271	5.452	5.42414	4.69782	4.99261	5.14045	4.51382	5.30859	4.89376	5.55767	6.1709	5.11717	5.43092	5.13594	5.36978	5.23511	5.63511	5.55053	5.32859	5.38701	4.68113	5.73449	4.90696	6.11141	5.09028	5.12775	5.76804	4.85925	5.25928	5.59966	5.24744	5.60847	5.47412	5.74522	5.08989
TKT|7086	7.51693	7.24046	7.78418	8.6136	7.85178	8.00627	7.35055	8.21764	7.28644	7.60654	7.32439	8.21794	6.21868	6.98344	7.74277	7.13543	8.71177	7.35832	8.22838	7.70793	8.34356	7.74154	7.85339	8.07994	7.45958	7.11376	6.8415	8.54793	8.211	8.3423	8.14648	7.21674	7.69191	6.92051	8.73038	7.11511	7.89284	7.26169	8.96021	7.45523	7.06586	8.09903	7.97137	7.09362	8.02432	8.01194	6.82085	6.88978	8.53094
C11orf68|83638	4.56087	5.20431	5.13684	4.56958	4.95083	4.97098	4.55701	5.32182	5.25612	5.05523	5.02697	5.12716	4.81539	5.71703	4.01501	5.34752	4.67775	5.22205	5.43927	4.51158	5.71739	4.96802	6.24449	5.13599	5.10871	5.28282	5.31022	5.09313	4.97059	5.11072	5.40185	5.27174	5.03908	5.34393	4.93518	5.24225	5.2685	5.81579	5.51781	5.09333	5.9066	5.28552	5.38587	5.72294	5.3179	4.94805	5.56735	5.37457	5.94306
GTF3A|2971	7.22734	7.60426	6.60256	7.50715	7.73336	7.2023	7.93111	7.74734	7.38846	7.62231	6.39536	7.47441	6.90985	7.7159	7.31341	7.47802	7.98571	6.60651	7.33378	7.27867	7.48472	6.79116	7.20241	8.08945	8.3482	6.6579	7.2153	6.58193	6.88209	8.07046	7.48332	7.05359	6.56448	6.76367	8.068	6.04062	7.3492	7.46353	7.97143	7.03186	6.02585	7.006	7.4871	7.42599	6.66633	7.47142	7.05757	7.12938	7.51757
HSP90AA1|3320	9.89105	9.80862	9.5729	9.26821	10.2271	10.743	10.1763	8.99782	9.68605	9.89058	9.30123	9.66382	9.30325	10.3437	9.68188	9.96744	9.61848	10.5167	10.0964	10.8881	9.93308	10.1044	10.2519	10.6921	10.1622	10.1047	11.4878	8.6703	10.2105	10.8777	9.74385	8.85305	10.2107	10.4202	10.8489	10.661	9.89822	9.52328	10.9721	9.77555	10.2259	10.042	10.2996	8.01557	10.5761	10.8472	8.86061	9.13864	9.47609
ALG3|10195	6.30822	5.57944	5.58402	6.16662	6.23329	6.02607	6.89699	6.84415	6.20487	6.25267	5.95814	6.77845	5.52295	5.93142	6.57213	5.79435	7.45409	7.21263	6.28936	6.55711	5.823	5.91428	5.32351	6.36465	6.07736	5.42787	5.97687	6.03095	7.14431	5.75533	6.59149	6.81563	6.28268	7.04594	6.45457	5.58575	5.96387	6.57474	6.7297	6.23728	5.37181	5.93894	6.09983	6.21475	6.88448	5.6696	6.08035	5.76977	6.33436
CNPY3|10695	5.56137	5.94356	6.09791	5.40008	5.36332	5.88543	6.02956	6.15934	6.00518	6.26566	6.00966	5.35588	6.17992	5.55602	6.3698	5.54385	5.63587	5.97584	5.91542	5.88455	6.04508	5.30445	6.10793	5.66362	6.14883	6.49311	5.13	6.04376	5.8153	5.94904	5.83663	6.20522	7.02992	5.22748	5.14978	5.79544	6.25137	6.35854	6.65111	6.02721	6.05236	5.40731	6.15972	6.59401	5.61136	5.92809	6.59657	5.85419	6.63438
PAIP2|51247	6.18446	6.99595	6.73168	6.68877	7.34091	6.94221	7.29717	6.97522	6.192	6.50738	7.10095	6.76661	7.18058	7.53599	6.78723	7.5221	7.59041	6.35098	7.07588	6.53325	6.54606	7.33207	6.89978	7.47326	7.26168	7.41665	7.55273	6.13563	7.01064	7.50697	6.61696	6.36873	6.98575	7.03643	6.4372	7.16977	6.90906	7.05293	6.93212	6.80519	6.97565	6.33072	6.51396	6.43478	7.01233	7.41261	6.44518	6.82813	6.63773
GSTO1|9446	6.46779	7.25805	7.14455	7.21137	7.59382	7.12022	6.61696	7.65021	7.54023	7.76965	7.07007	6.4681	7.48363	7.56204	7.98311	6.50045	7.42334	6.79555	6.99706	7.02674	7.80324	6.69745	7.30442	7.51394	7.888	8.07558	6.33174	6.98726	5.77145	7.76484	7.74124	6.66465	7.42011	7.01599	5.95401	7.06459	7.20715	8.24445	6.96704	7.09854	7.64029	7.15513	7.96191	6.87162	7.01208	7.11412	6.9517	8.1838	6.88641
RNH1|6050	6.38197	6.44039	6.79355	6.74737	6.5397	7.15252	6.23415	7.04086	6.87196	5.84813	7.00719	5.58762	7.042	6.80154	6.59978	7.13992	6.13433	6.61913	6.72045	6.6274	7.48598	6.87497	6.21978	6.7929	6.27207	6.55399	5.98097	6.50346	6.12549	6.51488	5.91358	7.32368	7.07144	5.40707	6.59018	6.77365	6.26318	7.53867	6.60157	7.62477	6.75003	6.36175	7.43164	6.84831	5.89834	6.35422	6.95156	7.24249	6.72862
VPS24|51652	5.96816	7.27075	6.03837	6.56699	6.4331	6.99099	6.69952	5.40726	6.15871	5.95703	6.61975	5.46439	6.94593	5.93055	7.31795	6.2349	6.66529	6.69444	6.64686	6.78877	5.98921	6.16429	6.56162	6.3724	5.29207	6.21122	7.03049	5.7106	7.48537	6.37277	6.48416	6.3463	7.51642	6.49733	6.8212	6.5484	5.95543	6.5137	6.58954	6.37334	6.8558	6.5265	6.09732	6.15187	6.44545	6.54529	5.75292	6.87459	6.74313
HMOX2|3163	4.71392	6.23221	5.40947	5.28202	5.21539	5.4921	5.51534	5.88442	5.74901	6.04365	6.01425	6.03017	5.51989	5.39499	5.56562	5.16764	5.07673	5.72976	6.47191	5.701	5.69078	5.24667	5.14911	5.54851	5.66925	5.73892	5.8082	5.59809	6.11045	5.19323	6.3539	6.09363	6.26686	4.42836	5.35918	6.35625	5.33306	5.20401	5.58793	5.87138	5.66693	5.81925	5.64666	5.9011	6.36268	5.29484	6.02926	6.30547	6.18743
ERI3|79033	5.54294	6.21421	6.25178	5.73649	5.32816	5.77219	6.15411	6.29993	5.67942	5.90089	6.15564	6.3405	5.68029	5.95319	5.35617	7.12334	5.43561	5.29742	6.45752	5.73696	6.37932	5.04479	6.04166	6.34342	5.38462	6.40416	6.29839	5.59233	6.14386	5.56844	6.52486	6.23502	6.43956	6.1988	5.00841	5.68894	6.96577	6.5804	6.73597	5.88833	6.03379	5.89447	5.73229	6.24678	5.1873	5.96852	6.42693	5.98337	5.10212
FARSA|2193	5.80106	5.68129	5.91316	5.66551	6.00221	5.81976	6.22674	5.50609	5.53883	5.38724	5.33367	6.16424	5.98126	6.45477	5.58119	5.44724	5.00893	6.93452	6.25423	6.53647	5.73081	4.81376	5.07513	6.07953	4.95814	5.66462	5.01739	6.29918	5.16119	5.17349	5.74892	5.49358	6.30406	5.20345	5.32469	5.6741	6.12826	5.28104	5.8029	5.88593	5.28036	5.84303	5.97209	6.52513	6.47603	6.21343	5.52486	5.64623	6.25938
ATP6V1G1|9550	6.90572	7.70626	6.90846	7.90732	6.82205	7.17335	8.62538	7.20163	8.04143	7.57306	7.87212	7.58018	7.60424	6.9173	7.27981	7.02803	8.00793	6.58921	7.15692	7.53293	6.86708	7.79959	6.93868	8.18908	7.71923	7.40211	8.11222	6.77489	8.98523	8.2217	7.80919	8.42885	6.72416	8.10985	7.03864	8.08762	7.21373	7.90765	7.18063	7.34041	8.09736	6.82601	8.09079	7.8654	7.40756	7.55572	7.17332	7.8007	7.5687
PRCC|5546	5.68185	5.85813	7.01969	6.19969	6.48906	6.8263	6.03418	6.5025	6.43293	5.86016	6.34255	6.31576	6.8609	6.72015	6.14091	6.04694	5.56447	6.98168	5.97624	6.37349	5.75656	6.83447	6.18248	6.13747	5.62347	5.99514	6.51308	5.99864	6.59023	6.15703	6.01412	5.97293	6.60598	6.08459	5.23239	5.62917	6.25272	6.58201	5.50646	6.96466	6.03718	6.37229	5.59072	5.97388	5.7124	6.20077	6.45383	5.87097	6.28686
METTL5|29081	5.79289	5.02569	5.55456	6.1843	5.96411	6.06083	5.99124	6.36369	6.47761	6.57136	4.94053	6.31789	5.30787	5.83919	6.02487	5.94783	6.40228	5.98115	5.44586	5.51958	5.11336	6.00089	5.75003	5.54899	5.92232	5.79978	5.59184	6.2368	6.19169	6.04296	6.53193	5.35763	6.08952	6.05063	6.35561	5.7355	6.184	6.97377	6.53809	6.001	5.46583	6.03576	5.90175	6.40897	5.44013	5.9795	6.19704	6.07499	5.89904
TMEM9B|56674	5.78083	5.62039	5.95276	6.27219	6.17329	5.87734	5.85554	6.03568	5.38289	5.78533	6.47606	5.6088	6.56993	6.13879	6.12613	6.44277	5.94018	5.14964	5.7307	5.48443	5.60337	6.0181	5.42604	6.18264	6.08973	5.90674	6.00716	5.33739	5.98739	5.80799	6.13851	5.49171	6.01918	6.96784	6.95673	6.08202	5.91851	6.38592	5.38313	6.3674	6.05217	5.98641	6.18571	5.24573	5.53217	6.30948	6.16738	6.04488	5.04382
PSMD1|5707	6.29618	6.5304	6.05645	7.28501	6.06927	6.49366	6.67448	5.32928	5.59763	5.51521	7.06989	5.98572	6.91375	6.50775	6.85247	6.01389	6.62679	6.87883	6.5984	6.48886	5.63837	6.53244	6.58804	6.62806	5.07716	5.85565	6.47412	5.98541	6.73712	6.65358	6.6706	5.9952	6.36114	6.53605	6.22726	6.91787	6.39047	6.95736	6.50019	6.04281	6.08849	6.65979	6.79713	6.13082	7.04273	6.52791	5.86315	6.34679	6.92232
C1QBP|708	5.95019	6.3935	6.48506	7.09033	7.1716	7.05696	7.4064	6.78603	6.9914	6.88075	7.14542	5.94364	7.36082	8.66296	6.98496	6.12885	7.1816	6.95063	7.26876	6.31341	7.51095	6.85609	7.20614	6.94538	6.94108	7.11692	6.86389	6.79285	6.48678	7.47254	7.43166	5.99368	6.82782	5.85049	7.50716	6.60258	6.40687	6.64875	7.73515	7.16894	6.71529	7.64072	7.44922	6.14335	6.71956	6.82193	6.3928	7.02272	5.88502
ELOF1|84337	6.44237	6.49565	6.26937	5.7445	5.66277	6.25826	6.49328	6.50658	5.77585	6.33676	6.04039	6.54522	6.03788	5.93894	6.5255	6.15468	5.70279	6.41764	6.60632	6.84053	6.33338	5.32328	6.18357	6.60562	6.252	6.51107	5.72453	6.5119	6.03561	6.28146	6.6936	6.13444	6.37038	5.5884	5.52571	6.08388	5.83217	5.72387	6.89573	6.1922	5.99188	5.84675	6.75621	7.77094	5.47386	5.68627	6.24378	6.36161	6.45834
UQCRC2|7385	6.77171	8.09187	7.45961	7.51955	7.93177	7.06749	7.72791	6.58375	7.35245	7.30603	7.57711	6.26993	7.58218	6.95006	7.68286	7.19674	6.73994	7.84596	7.7132	7.18515	6.83006	7.17594	7.16948	8.17464	6.87308	7.67609	7.97773	7.08695	7.81008	6.88412	7.08944	7.49284	7.77951	7.61416	7.28644	7.93111	7.68266	6.55524	6.67	7.13579	7.76954	8.32488	8.01286	6.42277	8.0873	7.37956	7.43742	7.53795	7.15261
COX16|51241	5.0583	5.58407	5.00512	5.52551	5.64485	4.84119	6.83851	5.65056	5.46908	5.78021	5.48608	6.81616	5.90109	6.25833	5.65255	5.27925	5.84271	4.88897	5.23818	5.63454	5.76878	5.79417	5.82263	5.70286	5.82952	5.37809	5.68427	5.59064	5.47791	5.86972	5.57497	4.68265	5.54221	5.85923	5.84462	4.81527	5.66015	4.94066	5.74051	5.61066	6.05559	5.24438	6.07801	4.90225	5.47976	5.45835	5.53563	5.64537	4.93425
MRPS22|56945	4.97865	5.35672	5.05527	5.49399	5.28928	5.22847	6.39916	5.47616	4.99781	5.21534	5.24043	5.30071	5.62551	6.30758	5.38967	5.54036	5.05294	5.53758	5.48476	5.21951	5.22387	5.09705	4.97772	5.82241	5.23056	5.43508	5.10032	5.3289	5.39851	5.38824	6.06278	5.12868	5.73846	5.59505	5.75252	5.33613	5.4355	6.1461	4.49806	5.24612	5.06692	5.14337	5.7443	4.93681	6.70488	6.03448	5.04671	5.59829	5.33293
TOR3A|64222	5.41018	6.19651	5.99985	6.16901	5.7554	6.15773	6.21851	6.49285	6.42357	6.1049	5.92124	6.17152	6.6173	5.96702	5.63633	5.80287	5.97274	6.17155	6.36088	6.97883	4.82171	5.96007	5.58903	5.69878	5.80523	6.22381	5.39327	6.23964	6.46696	6.09169	5.90114	5.94465	6.88423	5.23543	5.57556	6.18465	6.10222	6.01045	5.24731	6.37424	5.6621	6.33836	5.28424	6.4869	5.28153	6.23235	5.95933	5.81907	5.18414
NIT2|56954	5.35026	6.27851	5.68655	6.36892	5.9827	6.57902	6.47595	6.41538	5.64725	6.40185	5.98543	6.08811	6.33013	6.61337	5.41292	5.97427	6.1294	6.92879	5.66819	6.82028	6.31495	5.06465	5.66739	6.97634	5.85069	6.2528	5.84416	5.98788	6.29689	5.91338	6.16887	6.03649	6.67343	6.09891	6.52513	5.68068	6.27777	6.96789	4.84255	6.08014	5.89866	6.17072	6.49482	5.9479	6.8913	5.66419	7.14438	6.16932	6.36809
GRN|2896	7.81325	8.18488	8.39557	8.09399	7.88777	7.78382	8.43597	7.34513	8.52797	7.82343	8.46409	7.69404	7.69896	6.76585	7.83596	7.35649	7.26977	7.90741	8.36344	8.47081	7.79092	6.79617	7.48461	6.73273	7.90802	7.46375	6.99851	8.10526	8.03283	8.01721	7.87237	8.34163	8.75672	6.76625	9.02284	7.89599	7.07894	8.5209	7.43039	7.65033	8.5816	7.82811	8.00956	8.06476	8.21437	8.3756	8.1488	8.35063	8.13001
ADSL|158	6.25556	5.48742	5.8469	5.88878	5.98896	6.04351	5.9828	5.62059	6.14603	4.95646	5.40175	4.88923	6.1805	5.97129	5.99529	5.91416	6.43652	6.16105	6.241	5.85148	6.14081	5.49091	5.64148	6.25296	4.96472	6.33209	6.0391	5.22709	5.19178	5.37782	5.97548	4.69221	5.55702	5.40915	5.77925	5.19719	5.86639	5.25882	6.00008	5.55666	5.53334	6.26486	5.45926	4.89018	5.82747	5.96128	5.88742	5.72678	4.89081
C12orf57|113246	7.26436	7.75883	8.77785	7.31374	7.43596	7.87157	8.95556	9.06816	8.0746	9.2136	8.10847	7.87303	8.57548	8.29062	7.9875	7.93294	8.44198	8.04104	8.84434	8.37319	8.21482	8.42174	8.28375	8.18962	8.31418	8.81308	8.69173	8.999	7.15479	8.69712	7.40648	8.27607	8.28581	7.8639	6.4754	7.67722	8.57758	7.25185	8.85344	8.00618	8.77187	7.14918	9.02279	8.6497	6.84983	6.89856	8.5132	8.64174	7.39407
WDR61|80349	5.03579	5.65643	5.69672	6.0713	6.38795	7.07359	7.58301	5.78948	5.63003	5.81589	6.12764	6.04165	6.66974	6.58112	7.04476	6.27724	6.01456	6.20836	7.02451	6.66179	6.47137	6.19128	5.54085	6.17026	6.13167	5.58682	6.27846	6.03277	5.88396	6.28256	6.23108	5.28902	5.86042	6.73402	6.06679	5.72875	6.22428	6.49011	5.71674	6.24368	7.1607	5.96492	6.23753	5.23308	6.03538	6.12378	5.42629	6.43505	5.91965
RAB11B|9230	6.34409	6.71418	6.23233	5.7787	6.02364	6.00273	6.41067	6.31814	6.16547	6.55112	6.52399	5.71854	6.39472	6.09354	5.96186	5.91161	5.60606	7.40645	6.10275	5.97696	6.44263	5.45742	6.37556	6.28699	5.83597	5.96776	5.81843	6.0557	6.42057	6.00326	5.8449	6.67199	6.52958	5.65815	5.56539	6.15885	6.03781	6.33131	6.76305	6.34508	6.35598	5.64856	6.58042	7.24663	5.5736	5.65135	6.39958	6.40133	6.97531
TRIM27|5987	5.29606	5.66532	5.15144	5.44088	5.33347	5.53323	5.7883	5.14614	5.14094	5.12842	5.48489	5.50125	5.77458	5.81371	5.83875	4.9196	5.24352	5.22131	5.15355	6.03103	5.08235	5.53095	5.43097	5.56959	4.97121	5.2739	6.15509	5.05965	5.90872	5.23513	5.49791	5.67561	6.05905	5.88809	5.45507	6.34174	5.68481	6.38502	5.43326	5.18029	5.09866	6.1249	6.10245	5.25944	5.16221	5.41004	5.74392	5.19999	5.10486
JMJD8|339123	5.08162	6.25612	5.72152	5.10504	5.59111	6.23237	5.88447	6.29086	5.43708	6.20119	6.06558	6.28657	6.06984	5.64113	5.97182	6.40543	4.92633	5.87996	5.69769	6.25281	5.86224	5.77577	5.4219	5.98968	6.9064	5.76112	5.49812	5.71121	6.0217	5.19677	6.00399	6.36482	5.71478	4.97866	5.7223	5.94573	5.97765	5.49079	6.23397	6.47768	6.43631	6.02887	6.13297	5.95064	5.69302	4.70962	6.13342	5.95828	6.09133
PSMD2|5708	7.06365	7.41035	7.12087	7.94687	6.71232	8.07029	8.25053	7.66841	7.4614	6.9127	7.49906	6.59217	7.42342	7.42335	7.60742	7.36316	9.15828	8.19211	7.36879	8.23944	7.36866	7.26099	6.45823	8.14257	6.25774	6.96969	6.79095	6.86566	8.29447	7.6641	7.76971	7.20608	7.7009	7.13474	6.95256	7.00843	7.95798	8.06442	7.80987	7.23288	7.22626	7.51629	7.36026	7.04018	9.23635	7.62257	6.58731	7.31344	8.12278
CCND3|896	5.55347	6.50111	5.84043	5.9114	5.516	6.50477	5.7213	5.85234	4.90573	5.79877	6.16453	5.56377	5.6799	5.77972	6.43011	5.13793	4.8144	4.8488	5.66252	5.79101	5.52703	5.72585	5.91395	5.76137	5.9052	6.34687	5.383	5.58126	5.94925	5.81572	5.69492	5.98235	6.62851	5.3194	4.71864	5.64025	6.44439	5.94494	4.55189	5.54368	5.59266	5.84444	5.83489	6.05798	6.04632	5.49331	5.84737	6.00444	6.07632
MORF4L2|9643	7.88258	7.99994	7.35574	8.05872	7.62382	10.5006	8.47425	7.90862	7.98492	7.46629	8.17156	8.94627	8.36392	8.48745	7.44145	8.5294	8.45329	7.67756	8.35192	8.03715	8.77006	8.34819	7.9154	8.24669	7.92105	8.31069	8.62591	7.92573	8.56433	7.93293	7.90205	7.31321	8.21288	8.45608	7.98261	9.08071	8.01596	8.50877	8.38489	9.21649	8.15375	8.32804	8.2612	7.87852	8.63323	7.66202	7.65902	8.30322	7.91882
NRD1|4898	6.27485	6.66097	6.36288	7.05675	6.12722	6.58208	6.97721	6.40402	5.95571	6.19613	6.68799	6.71346	6.27629	6.62467	5.9171	5.75131	6.03623	6.94629	6.68599	6.7058	6.37024	7.01796	6.12546	6.98091	5.56396	6.63398	6.6275	6.02539	6.79393	6.32649	7.22854	5.85354	7.13498	7.46601	6.43434	7.07501	7.0325	6.88535	7.37357	6.16012	6.00797	6.78204	6.73898	6.06328	6.52246	6.73104	6.65418	5.75746	6.92182
DRG1|4733	5.42171	6.41465	6.15348	6.34089	6.54485	6.41533	6.85429	6.64372	6.53398	6.29111	5.71463	6.59186	6.68192	6.78244	6.96811	6.56733	6.78233	6.72225	7.01808	6.27812	6.65231	6.63106	6.59956	7.10252	5.74636	6.97845	6.79984	6.22554	6.76538	6.48974	6.91884	5.61153	6.06315	6.88368	6.23485	6.23892	6.95844	6.91769	5.92515	6.26768	7.81748	7.05035	6.63486	5.56404	6.14333	6.48578	6.23603	6.12571	6.86131
LGMN|5641	7.09618	7.52448	7.15231	7.75429	7.25968	6.49712	6.52378	6.69985	7.49718	6.75739	7.08713	6.647	6.29171	6.66951	6.87364	6.10115	6.83707	6.90054	7.88871	7.51587	6.59629	6.37753	6.97957	6.45881	6.16318	7.13018	7.16434	7.53025	7.05217	6.84475	7.22816	6.59915	8.04336	7.28949	7.74071	7.32676	6.69353	7.76131	7.49727	6.2398	7.69669	7.47506	7.11029	6.76236	6.88651	7.86943	7.12098	7.6352	7.41871
IFNGR2|3460	7.37471	7.04272	7.03942	7.61281	6.95368	7.07446	7.13275	7.45008	6.61701	6.23966	7.76997	7.89603	7.08348	6.95219	6.14422	7.38191	7.41572	7.23523	6.78926	6.80927	6.16545	7.16823	7.55459	6.53018	6.94891	6.44091	6.61824	7.56669	8.06071	7.57815	7.10645	5.80148	8.33382	8.10002	6.77428	6.80214	6.24918	7.69263	6.91073	6.57633	7.75375	8.10347	7.11904	7.70048	7.33433	6.90532	7.42208	7.68033	6.88673
KHSRP|8570	5.08274	6.12573	6.01536	5.64442	5.69888	5.64925	6.1295	5.42898	5.43133	5.19734	5.60144	5.18459	6.12499	6.24931	5.36588	5.92695	5.28937	5.78217	6.2026	5.56338	6.07054	5.39236	5.48631	5.92226	4.69611	5.84121	5.25226	5.62634	5.60299	6.0123	5.89177	5.19881	6.76063	5.21692	5.41983	6.48507	5.68645	5.6262	6.00286	6.12348	5.60942	5.82322	5.90854	6.27133	5.92609	5.52523	5.80795	5.52466	6.30495
TTC1|7265	5.94901	6.14248	5.70959	5.93019	6.05943	6.4456	6.72017	6.49802	5.57798	5.59239	7.15254	6.64768	6.41674	5.83181	6.57307	6.39224	6.02312	5.65131	6.53749	6.96622	5.81681	6.05538	6.03646	6.7942	6.51022	6.03601	6.73294	5.65841	7.13995	5.90534	6.40077	5.99376	6.21108	6.701	5.13195	6.16746	5.82108	5.80786	5.9464	6.0386	6.39299	5.65858	6.88996	6.55905	5.95441	6.47406	6.02247	6.49847	5.88524
SPINT2|10653	9.69064	9.92915	9.60529	8.59532	8.25389	10.0299	10.2577	9.36622	10.2972	9.05947	9.86582	9.61624	9.42082	9.14017	9.85314	9.57996	9.83328	9.93632	8.72517	8.86672	8.60335	8.66297	9.54409	9.20358	9.2588	8.371	9.16282	8.3272	9.54315	11.5606	8.65422	10.047	10.1822	8.60733	8.70042	9.17833	10.0306	8.66787	9.87209	9.59487	10.1723	8.66289	9.52486	9.4956	10.3407	11.8449	9.25271	11.2815	9.15582
UBE2Q1|55585	5.626	5.49914	6.33439	6.06941	5.878	6.59166	5.81774	5.94349	5.77766	5.56555	5.93484	6.02248	6.2767	6.01537	5.97922	5.51446	5.53315	6.38715	5.76185	6.32116	5.27259	6.09104	5.82128	5.53891	5.54948	5.6857	6.26573	5.54501	6.97624	5.8214	5.60342	5.61269	6.46279	6.1719	5.57139	5.5252	5.50895	6.18984	5.68435	6.26228	5.51	5.99103	5.33002	5.20402	5.26491	5.59118	5.54133	5.79762	5.5577
DDX1|1653	6.09117	6.50131	6.0061	6.58217	6.52882	6.06381	6.36842	5.98764	5.86613	6.03278	6.05075	5.71702	6.89953	6.67922	7.53995	6.8151	6.44152	6.69115	6.85473	6.40167	6.49614	6.74432	6.2284	6.74588	6.10398	6.87052	7.35096	5.89146	6.88807	6.01907	7.1541	6.1264	7.5923	6.90311	6.74892	6.79693	6.29833	6.64662	5.99435	6.29951	6.23811	6.59518	6.8484	5.61936	7.68465	6.72919	5.91145	6.56925	6.29565
CHCHD8|51287	5.66001	6.22043	6.55872	5.86058	6.79136	6.70739	6.31252	6.82087	6.74617	6.7217	6.55634	6.87967	7.14704	8.07915	5.89459	6.30489	7.22831	7.0811	7.34293	5.44582	6.92096	6.57397	7.22862	7.13152	6.45509	6.94744	5.85139	6.65616	6.41103	6.36721	6.86119	5.75508	5.52236	6.16027	6.24612	5.97941	6.39023	6.64914	6.54623	6.74109	6.82153	7.17751	6.78736	6.5936	6.3651	6.40962	6.85552	5.95057	6.90412
ARFGAP2|84364	5.13138	5.95267	5.82932	5.96662	5.77585	6.74176	5.54832	5.54454	5.7495	5.41234	5.71823	5.07176	6.39598	6.282	6.32143	5.91867	5.09384	5.05397	5.46274	5.50164	5.47274	5.97004	5.01521	6.04846	5.63559	5.52976	6.21673	5.03035	5.74055	5.94949	5.56039	6.50833	6.18549	5.29076	5.32628	6.31676	5.55981	6.07533	6.12935	6.35487	6.38248	5.80361	6.22072	5.2458	4.76989	6.03025	5.4175	5.69406	6.27218
PDCL3|79031	5.82937	6.00685	5.49714	5.58226	5.3248	5.34289	6.28234	5.77959	5.71907	5.98533	5.91304	4.94047	5.99059	5.47784	5.25472	6.26292	6.24282	6.20115	5.84443	5.99972	5.79022	5.63943	5.34183	5.88272	5.49532	7.62928	5.87556	5.89673	6.42977	5.84549	5.97974	6.03133	6.46503	5.38603	5.57266	6.1338	5.63394	5.76368	6.33642	5.67233	5.66546	5.55494	6.05335	6.37349	6.4639	6.08991	5.79247	5.95561	5.79695
ATP1B3|483	6.74276	6.26202	5.50196	6.40101	6.44661	6.1054	7.24656	6.39139	6.46853	6.88297	6.39801	7.13272	5.92872	6.66487	5.89661	5.34656	5.78136	7.70297	6.85918	6.76572	6.27015	5.75179	7.16294	5.96385	5.80009	6.17927	5.86139	7.1087	7.153	6.30547	7.31508	6.27313	7.11117	6.6738	6.71173	6.52896	6.58237	6.60415	5.78719	6.47413	6.08068	7.17605	7.2144	7.0459	6.95794	6.20095	6.42158	6.25214	5.97489
NDUFA2|4695	6.5567	7.39236	7.42448	6.46726	6.8277	8.30421	8.0536	7.93836	6.95661	8.00672	8.04704	8.09021	7.17588	7.68317	8.04758	7.08912	7.61378	6.42164	8.10018	7.38247	7.54075	7.35037	7.60891	7.69024	8.47285	7.28117	8.06069	7.13599	7.53789	7.80909	7.38326	7.70183	8.40421	7.43722	6.67845	7.27596	7.26167	6.50155	7.43592	7.21817	7.95251	6.74592	8.07747	8.3444	6.24493	7.19268	8.01309	7.89959	7.59054
RAB11A|8766	6.65338	6.81347	7.34643	7.46626	7.47372	7.55566	8.11981	6.94793	6.6154	6.83877	7.98479	7.58364	8.17394	7.69195	7.10393	7.15047	7.44253	7.1467	8.34996	7.72389	7.32794	7.6885	6.58043	7.79196	7.44013	6.61343	7.46308	7.341	7.24798	7.62264	7.45594	6.79004	6.97467	9.43981	6.74715	7.00132	7.05199	8.01728	7.06663	7.14618	7.47889	7.0601	7.53011	6.37827	6.61125	7.68962	6.67887	7.38636	6.94512
ZCCHC17|51538	4.79736	5.36219	5.29662	5.21073	4.45149	5.07569	5.40011	5.68316	4.62669	5.08117	5.41204	5.58365	4.93729	4.54049	4.75803	4.87408	5.42928	4.80778	5.37812	5.1924	5.64843	4.16168	5.37802	5.64026	4.8018	5.63896	5.19159	4.99164	5.46284	4.90657	5.55404	5.25105	5.84664	5.75389	4.97528	5.21742	5.47327	5.09082	5.32188	5.02173	5.74499	5.26779	5.65677	5.35033	5.46707	5.15691	5.10554	5.12558	4.66897
ACAD9|28976	5.2421	4.92872	5.11076	5.26452	4.97435	5.12156	5.56354	4.49209	5.19943	4.2948	4.68679	5.17902	5.2524	6.06637	5.44309	5.53961	4.64162	5.198	4.59877	4.76809	5.40484	4.81363	4.49082	4.97108	5.04341	5.40993	4.11429	4.81571	5.59219	5.10195	5.17966	5.16726	5.26268	4.70682	4.50433	4.40721	5.53449	5.52971	5.47258	5.11131	5.07885	5.09435	4.99223	4.96122	5.72331	5.38236	5.08492	5.16556	5.45569
BRE|9577	5.60244	6.00726	4.94369	5.27265	5.7249	5.2729	5.20392	5.85701	4.81386	5.17948	5.06754	5.47927	5.52749	5.05545	5.54484	5.7516	5.15181	5.2815	5.26953	5.64221	5.94028	5.77577	5.51137	5.55053	5.93126	6.17429	6.30666	5.47001	6.33018	4.67709	6.01426	6.18722	6.56496	6.38923	5.35815	5.20113	5.19962	5.63919	4.83308	5.76691	5.59302	5.62383	5.65985	6.23957	6.20076	5.30915	5.6315	5.79843	5.25972
FH|2271	6.40154	6.24682	5.86551	7.18939	6.38209	7.38637	6.10641	6.66354	6.8096	6.52883	7.06999	6.96617	7.11368	7.31303	7.26563	5.71597	6.99994	8.11594	7.41939	6.42041	6.06935	6.96354	6.50674	6.75898	5.74677	6.92625	7.22764	6.54267	6.89141	6.02394	6.21847	6.80406	7.21276	7.05142	7.27572	7.15226	6.67103	6.78463	6.99836	6.80391	6.12833	7.94451	6.86251	5.96485	6.82719	6.21773	6.18368	6.40668	6.28253
TSG101|7251	5.98123	6.33306	6.07967	6.37793	6.30181	7.27731	6.06599	5.9387	6.50944	6.06401	6.43959	6.05564	6.8907	6.52128	6.62796	6.47452	5.63301	5.87765	6.20685	6.03377	6.16534	6.36876	5.25189	6.52983	6.0397	6.10285	6.8825	5.43956	5.97113	6.27704	6.04086	6.5042	6.55618	7.0335	6.41845	6.21594	6.21315	7.05923	5.92559	6.98264	6.16294	6.26852	6.42575	5.50071	5.78686	6.99011	6.27871	6.48042	5.67444
BFAR|51283	4.75328	5.29401	5.37847	5.29404	5.98619	5.51914	5.71356	5.00398	5.6873	5.14834	5.58749	5.04343	6.01751	5.88121	5.40476	5.77652	4.98014	5.5628	5.93765	5.07349	5.26276	5.12313	5.30297	5.84203	5.42733	5.57624	5.95481	5.15923	5.5184	5.27279	5.8128	5.29811	6.11375	5.9989	5.52914	5.5024	5.46955	5.34022	5.14838	6.06736	5.88522	6.01791	5.18337	5.68034	5.93538	5.28801	6.0839	5.82571	5.83314
MED8|112950	5.24387	5.75865	6.07656	5.73863	5.33683	5.53966	6.02029	5.6917	5.70287	5.0578	5.70078	6.24877	5.34794	5.45887	5.66276	6.89262	5.29221	5.44373	6.65042	6.00148	5.68357	5.04318	5.21339	5.82907	5.21367	5.77555	5.53921	5.61804	6.40099	5.91423	6.67246	6.24134	6.17781	6.21519	5.62849	6.40089	6.85549	6.94281	6.25466	5.41389	5.485	6.18491	6.05181	5.89389	5.68807	6.28684	5.94747	5.96996	5.50929
CAP1|10487	7.99105	8.1781	9.27807	8.61548	8.05864	7.47565	8.95917	7.76428	7.68985	7.81329	8.44039	7.91402	8.58689	7.97224	7.40683	9.24181	7.59631	7.72215	8.40248	8.89278	8.00248	7.92282	7.98834	9.68768	7.32482	8.32276	7.80443	7.70974	7.85117	8.6316	8.32844	8.21279	8.89121	9.67042	7.46757	8.46858	8.55358	8.27515	8.66499	8.36339	8.75965	8.39199	7.92081	8.13882	7.60979	8.14943	8.23772	8.97357	7.8434
PES1|23481	5.33259	5.80309	6.06567	5.5893	5.87239	6.29998	6.75382	5.82826	6.00839	5.38717	5.48555	6.22536	5.80632	6.33333	5.85913	6.04014	6.81894	6.35057	6.38984	5.81853	6.3689	5.9293	6.11931	6.42811	4.66972	5.87368	5.35682	5.73556	5.78077	5.29961	5.77948	5.64852	5.65041	5.46716	5.18763	5.46611	6.47508	5.44436	6.24242	5.65673	6.87231	6.05654	6.11918	5.4041	5.59397	5.22105	5.55934	6.02633	6.99327
MOGS|7841	5.26829	6.11164	5.60747	5.01374	5.09817	5.59265	5.35875	5.56413	5.41512	5.16124	5.58197	5.23003	5.53203	5.32085	5.65761	5.69302	4.93849	5.79129	5.51865	5.49504	4.70393	5.23777	4.9794	4.99833	5.03636	5.49415	5.55776	5.59819	6.07391	4.93258	5.97353	6.5363	7.04048	4.74858	4.97625	6.17376	5.29951	5.87703	5.68081	5.04787	5.88249	5.22057	6.07221	5.77723	5.5468	5.53064	5.8212	5.67679	5.89295
CTNNA1|1495	7.53374	8.12094	8.15933	7.3753	7.99096	7.97199	8.32698	7.64958	7.09947	7.49183	8.32255	7.59933	9.01979	8.01727	8.44381	8.23415	7.9828	7.95521	7.96536	8.50708	8.77699	8.31012	7.88655	8.78486	7.91247	8.0147	8.65826	7.24646	7.94828	8.20934	7.68424	7.6971	8.50741	8.22359	7.39909	8.2468	8.11362	8.01118	8.00085	8.55759	8.53422	7.68411	8.30479	8.35463	7.73123	8.33253	5.78283	8.25727	8.06312
UGP2|7360	7.11016	6.87219	6.81796	7.15951	6.69504	6.38094	7.07145	5.98279	6.0422	6.54306	6.94868	6.74756	7.01859	6.04586	7.16512	6.80204	7.60944	7.36205	6.91693	6.92243	6.10358	6.47931	7.03998	6.92212	6.22711	6.97767	7.01235	6.90588	7.80023	6.62018	6.72753	6.67835	7.82818	7.70172	7.29796	6.97415	6.98315	7.34192	6.65207	6.80152	6.76959	7.17771	6.976	6.31412	8.99252	7.19569	6.39089	6.97867	6.16169
MRPL16|54948	5.17403	5.20016	5.42725	5.2712	5.34112	4.67055	5.2909	5.51359	6.04265	5.05699	5.50016	5.74576	4.79721	5.38909	4.77281	5.47933	4.79511	5.70583	6.21963	5.37926	5.53784	5.76392	5.33163	5.5845	5.70451	5.85986	5.29268	5.59856	5.11028	5.41257	5.82312	4.60561	5.97558	4.74072	5.98834	5.52057	5.4691	5.78321	6.55084	5.31437	5.07202	5.87842	5.67818	5.29362	5.23724	5.64983	5.83072	4.91859	5.65393
MRFAP1L1|114932	5.37362	6.50456	5.97165	6.23903	5.77236	6.54905	5.83868	5.64856	5.5561	5.94376	6.13677	6.26747	6.86075	6.51999	6.40753	5.78433	5.30138	6.14493	5.40292	7.06699	6.25883	5.63798	5.79316	6.31872	6.50058	6.02753	6.33365	6.08068	7.07047	5.48432	6.16816	6.03567	5.5294	5.67666	5.18794	6.13032	5.95115	6.74208	5.45439	6.4524	7.00446	5.58827	6.41931	6.50468	6.80445	5.9325	6.23844	6.52994	5.94148
MRPL53|116540	5.34044	6.53683	6.46999	5.77429	6.1906	7.30981	6.11878	6.46752	6.41703	7.45908	6.85597	6.1441	6.4293	6.24097	6.67069	6.98204	6.18914	6.19329	5.92001	5.7252	6.32459	6.26332	6.66456	6.5511	6.65404	6.90028	6.46939	6.23893	6.94881	6.10366	6.02996	6.69514	6.33477	5.31163	6.18559	5.93876	6.158	6.42634	6.90651	6.56753	6.09146	5.83361	6.47857	6.75325	6.18369	5.9912	6.33721	6.91833	7.05323
FKBP3|2287	5.66943	6.52188	6.32465	6.20844	6.00704	6.72089	7.66908	6.59789	6.71141	6.8497	6.34311	7.44249	6.88289	6.29029	6.5616	6.72376	6.52503	6.16445	7.32234	6.6062	6.01416	6.12179	6.51626	6.22846	7.16896	7.04514	7.05154	5.9805	6.08734	6.4251	6.49747	6.7352	8.41724	7.02461	6.42573	5.58073	6.72576	6.57502	8.05106	6.07256	6.98784	6.5668	6.8789	5.74151	5.93329	6.95392	6.38941	6.42433	6.60004
SAP18|10284	6.53941	7.08598	6.22865	6.76837	6.86771	7.56732	7.40278	6.61061	6.44173	6.1441	6.45263	7.0102	6.963	6.69458	6.56373	6.04996	6.58854	5.78206	6.21558	6.73555	6.54625	6.67345	5.62553	6.88376	7.58904	6.20196	6.70764	6.15234	6.8055	7.75925	6.62772	6.71853	5.84831	5.83594	7.07216	5.4971	6.91513	6.68156	6.54056	6.29418	5.58969	6.04322	7.22343	6.85896	6.484	7.16223	6.28205	7.0066	6.64789
RFWD2|64326	5.82422	5.36309	5.31503	5.89928	5.82547	6.21615	5.57618	5.82075	5.68826	5.23352	5.67453	5.8217	5.91472	5.47905	5.66787	5.52664	5.90738	5.78583	5.40017	5.88092	4.98511	6.14104	5.46558	5.33036	5.50162	5.65921	6.3934	5.41716	6.56629	5.73568	5.93752	5.36901	6.65642	6.28833	5.77254	5.55695	5.45793	5.86784	5.38651	6.06022	5.63519	6.2834	5.42728	6.33766	5.4975	6.15332	5.57861	5.60244	5.22611
ATP6V0D1|9114	6.48202	7.32623	6.10309	6.70178	6.32312	7.71468	7.46257	5.51922	6.33777	6.61758	6.77156	6.29051	6.43763	6.60197	6.8566	5.80786	6.62209	6.99926	6.94517	7.62965	7.00293	5.92554	7.04256	6.16944	5.85761	5.9834	7.53985	6.67922	6.81223	6.82498	6.57298	7.76969	7.00414	6.98071	7.82055	7.13645	6.56075	7.25795	8.11969	6.2032	7.77757	7.14845	7.38613	7.15305	6.68701	6.71443	6.45667	7.12746	6.61049
SYNGR2|9144	8.1882	9.47983	9.21173	7.68124	8.6932	8.55802	7.85862	7.37512	8.58683	10.1087	8.27206	7.04879	7.89996	9.48475	7.89941	7.37992	7.64596	8.69076	7.64631	7.99228	7.9046	7.21005	9.7936	9.46676	7.733	8.59976	8.87553	7.53109	8.53219	8.03915	8.15135	8.02757	8.13412	7.57667	7.91737	8.53923	7.54167	8.40366	7.9321	7.41324	7.35322	8.35608	8.88536	8.50299	8.13542	7.56259	8.20736	7.82072	8.92793
MRPL24|79590	6.97973	6.23264	8.30071	7.55198	7.77517	7.9257	6.8521	8.4596	7.84699	7.73755	7.6348	7.68066	7.66596	7.51092	7.47287	7.58615	6.9339	7.3039	7.16757	7.07297	7.31481	8.14342	7.4225	7.46677	7.89487	7.58956	6.57974	7.26652	7.58065	7.0282	7.08197	7.23256	6.48939	5.90941	7.04594	6.19732	7.40923	7.06669	6.58811	7.81825	6.87135	7.69674	7.10702	6.79317	6.44488	6.35046	6.72841	7.04196	6.63725
ATP1A1|476	9.15838	9.66609	8.98812	8.78976	8.65389	9.01315	9.0747	9.35294	8.54697	9.22488	9.56742	9.19952	9.04661	9.24959	10.0215	8.13542	9.51649	9.80898	10.8776	9.0299	8.37975	10.087	9.89726	9.70684	8.94176	9.18564	8.60012	7.76341	8.35466	8.27507	8.8245	8.87567	10.3996	9.00229	9.42659	8.18063	9.06095	8.51901	8.02996	9.41717	10.4748	9.27562	10.6885	10.0145	9.05925	8.59971	9.93483	8.87312	8.62203
TRA2A|29896	5.67258	5.93658	5.76341	6.21804	6.03377	5.92027	5.93147	5.49039	5.91324	5.56738	6.53711	5.87061	6.38923	6.08743	6.07842	6.06206	5.29195	5.73474	6.40309	6.41407	5.69508	6.20903	6.2414	5.80502	6.33876	6.43102	7.21013	5.89159	6.33674	6.12325	6.39145	6.26975	5.90281	6.88526	5.62762	6.53885	4.91109	6.31521	6.01495	6.50156	6.08493	5.64101	5.9385	6.25947	6.0771	6.15246	6.01364	6.25228	6.4407
DAP|1611	7.52608	7.8931	7.05825	7.29615	7.1005	6.61105	7.44863	7.21668	7.22354	7.29766	8.57327	7.46798	7.77905	6.75153	8.30267	7.5415	8.03333	7.12388	7.8049	8.44245	6.92928	7.25041	8.69737	7.09337	6.27783	6.92327	8.26924	7.11546	7.74251	7.27256	6.95104	7.59021	7.17488	7.83648	9.21461	8.69881	7.2913	8.2953	8.65362	6.96808	7.91048	8.64956	8.48416	7.58125	8.00897	6.83321	7.24087	7.65146	7.21266
SLC35A4|113829	5.68451	6.28066	6.09042	5.81144	6.14324	6.29871	6.53651	6.15366	5.16199	5.92548	6.28552	6.42821	6.29197	6.29287	6.96525	5.89397	5.612	5.31812	6.41904	6.49434	5.84734	6.05072	5.76018	5.99192	5.55994	5.08472	6.7943	5.21493	6.39427	5.98037	6.10327	5.87839	7.22969	6.92807	5.66502	6.50008	5.93871	5.79936	5.51002	6.04128	6.5831	5.92503	6.33307	6.2892	5.38242	6.18929	6.22569	6.17482	6.04977
PHF5A|84844	5.82609	5.19686	5.13145	5.14608	5.60681	5.4573	6.15764	5.63226	5.85788	4.99593	5.12056	5.97138	5.8093	5.82793	6.09544	5.55543	6.39544	5.68533	5.76377	5.56359	5.5246	5.43998	6.0227	6.17233	5.02393	6.13787	5.93207	5.19916	5.91022	6.21857	5.6098	4.94598	5.33871	5.38264	5.31643	5.12623	5.59316	5.10707	5.61957	5.2284	5.52912	5.70263	5.03782	5.15224	5.41574	5.39415	5.52819	5.47789	4.78424
DDX3X|1654	6.2745	7.24493	6.88361	7.68454	6.99727	7.27405	7.12675	5.7793	6.47353	6.20945	7.22959	6.5233	7.53983	7.34657	6.81988	7.20341	7.0074	7.32778	6.9875	6.94346	6.60038	7.1134	6.71615	6.87955	6.1907	6.82739	7.29894	6.5662	6.97262	6.9813	6.98911	6.01066	7.22121	8.00331	7.80133	7.38314	7.27506	7.14543	6.93351	7.46103	7.02195	7.28315	6.88624	6.1916	7.68353	7.5572	6.65256	6.96187	7.24183
GUK1|2987	8.91141	8.1353	7.38893	7.85519	7.16633	8.96776	9.09629	8.85562	8.16774	9.35628	8.77279	8.44353	7.92241	8.56332	8.61854	7.17234	8.80525	8.43141	8.54355	8.19119	8.24021	8.68822	7.86705	7.21554	8.50108	7.95113	7.84195	8.36217	8.01628	8.32696	6.81542	9.56049	8.2746	6.95961	8.03812	7.97076	8.18796	8.46508	8.50117	8.00326	8.26847	8.19965	8.03682	9.06301	6.67105	7.20429	8.2316	9.47149	8.26988
NDUFB9|4715	8.3295	8.21003	8.48619	9.01048	9.33071	8.16204	10.6269	9.24992	8.75925	9.28554	8.60667	8.97992	8.01646	9.25141	9.30712	8.00324	9.09236	8.57118	7.73365	7.71917	8.81704	10.026	9.67563	9.32152	9.45388	8.64785	9.06422	8.52914	8.3495	9.88007	9.09975	7.9794	8.16438	7.21103	9.23123	8.93399	8.37297	8.06811	8.38322	8.49407	7.87638	11.2106	8.47831	8.83259	8.60032	9.47325	8.06596	8.41832	8.62071
UPF1|5976	5.46846	5.68504	5.47324	5.47979	4.97053	5.47227	5.52332	5.06143	4.52656	5.01483	5.41741	4.38423	5.98396	5.48336	5.1114	5.42021	5.71741	5.63118	5.39471	6.52692	5.41799	5.66842	5.12552	6.06085	4.76731	5.45434	5.08955	5.14526	5.12709	5.6919	5.19959	6.9986	5.67821	4.68796	5.18489	5.72134	5.79047	5.07731	5.94643	5.77166	5.12801	5.15539	6.01731	6.30864	5.1857	5.33956	5.4827	5.42928	5.91346
ZNF638|27332	6.12176	5.74142	5.65584	5.64807	6.01044	6.81496	6.35364	5.79262	5.10353	5.45318	6.12199	5.72819	6.84047	6.17737	5.79083	6.03061	6.56195	6.06303	6.06119	6.40384	5.39515	6.11769	5.89218	5.87728	5.93653	6.41153	7.09633	5.47285	6.545	5.82249	6.44766	5.73659	6.48704	6.56094	5.43821	5.99896	5.61356	6.573	6.12772	5.96894	5.90325	5.66111	5.99135	5.88226	5.9834	6.30744	5.80018	5.94792	5.67678
PMPCB|9512	5.42152	5.90521	5.90802	6.06448	6.00968	5.58899	6.03908	5.5443	6.01022	5.40611	5.80468	5.49334	6.47376	6.58146	6.34076	5.23394	6.04826	5.24685	5.49548	5.85568	5.22547	5.68114	5.58796	6.48006	5.87763	5.78448	5.49143	5.43834	6.72372	5.94892	5.56421	5.60058	6.03942	5.9854	6.37858	4.83721	5.78831	6.15448	6.31197	5.4558	5.50706	6.56494	5.28246	5.32648	5.59435	5.86654	5.34083	6.11031	5.52091
UBE2F|140739	5.1029	5.65211	5.00376	5.61775	5.29153	5.04751	5.38532	4.9335	4.97552	5.11784	6.69687	4.8731	5.53394	4.98246	5.79627	4.80677	5.70156	4.89435	5.37111	5.90747	4.73752	5.6647	5.65174	5.0024	5.32327	5.1946	5.84478	5.43353	5.89264	5.44463	6.25279	6.15854	5.4117	5.45716	5.43474	5.9884	5.28669	6.60705	6.19294	5.63477	5.14393	5.68721	5.33975	6.09749	5.4133	5.84182	5.66421	5.58691	5.66921
HDAC3|8841	5.11152	5.86531	5.5578	5.13667	5.53386	5.46084	5.88209	5.19584	4.56559	4.77404	6.1637	4.91831	5.42612	5.91744	5.5084	5.6563	5.47904	4.89164	5.54641	5.57551	5.45121	5.47993	5.51843	5.71734	4.69612	5.076	6.33419	4.53946	5.16712	5.48118	5.55254	5.53173	5.58617	5.57957	5.22027	6.00516	5.54947	5.39751	5.84598	5.90179	5.85316	5.52221	5.38715	5.13761	5.38561	5.56881	5.85198	5.61784	5.70622
ELAC2|60528	4.89243	5.80205	5.14002	5.43477	5.20868	5.53127	5.44463	4.76782	5.02125	4.78417	5.39969	4.71452	5.8107	6.43497	5.66961	5.11323	5.6043	5.34388	5.67902	5.25546	6.1991	4.99885	5.32322	5.75092	5.02596	4.63172	5.24078	5.03516	5.38392	5.55773	5.23764	5.46774	5.38862	5.31522	5.82836	4.71236	4.99835	5.32184	5.9814	5.38899	5.07962	5.84419	6.37729	5.20274	4.144	5.12656	4.65676	5.55127	5.47034
MRPL9|65005	5.3272	5.9175	6.80103	6.45441	6.72715	6.82358	6.29576	6.99488	6.71557	6.82438	6.14103	6.81149	6.96565	6.79101	6.47332	6.28381	7.60241	7.67837	6.45241	6.48312	6.35071	7.22685	5.99593	6.39744	6.51188	6.95097	6.62963	6.15589	6.44018	6.45427	6.17291	5.71529	6.54495	6.37456	5.66359	6.03545	6.74351	6.98228	6.6218	6.92212	6.12036	6.53291	6.14607	5.9426	6.64411	6.28036	6.58278	6.15508	6.30603
MTCH2|23788	5.65533	6.75116	5.75521	6.36583	6.26382	6.39145	6.00882	6.10468	6.38711	5.96015	6.52377	5.55682	6.3696	6.32357	6.8434	5.97726	5.73425	5.75175	6.50476	7.43341	5.38286	6.33541	5.35371	6.43994	5.65858	6.29116	6.72119	5.41203	5.8069	6.05085	6.42771	6.59226	6.33361	6.41744	6.40295	6.3232	6.3316	6.54761	5.97975	6.78041	5.6344	6.42775	6.44514	5.05046	4.75282	6.45446	5.05478	5.8142	6.08317
C6orf62|81688	7.06546	7.6015	6.81648	7.71833	7.38099	8.23345	7.65589	7.34021	7.43033	6.87653	7.31166	7.54691	7.69314	6.37921	7.34481	7.25033	7.86045	6.61505	6.5107	7.77278	6.82614	7.36674	6.76881	7.64741	6.85693	7.67691	8.57207	6.66731	7.56823	7.26358	7.50512	6.83996	8.18388	8.3672	7.37985	7.24399	7.86388	8.18452	6.7889	7.3076	6.94577	7.57917	7.32145	7.02866	7.7777	7.697	7.15644	7.23119	5.83283
FLOT1|10211	7.0016	7.07751	7.13454	7.04702	7.21905	8.50221	7.3863	7.69061	7.20538	7.66425	7.32841	7.66606	8.17179	8.21926	6.65317	8.0749	7.77153	6.66039	6.83995	8.30818	7.35566	7.47303	6.59881	7.79807	8.08623	7.48083	7.20974	6.90982	6.99276	7.14023	6.69859	8.29779	7.89927	6.9649	6.04007	7.5899	8.14752	7.94395	7.19859	7.80399	7.8605	6.62244	7.77458	7.47685	6.90828	6.84046	7.89542	7.41845	6.91037
TMEM179B|374395	6.04071	6.19645	6.43343	6.11162	6.95781	6.61787	5.83309	7.33577	6.93761	6.74605	6.93534	6.54962	5.63209	5.58757	5.5494	6.33787	5.79425	6.92183	6.66742	6.12797	6.2753	6.33684	7.7833	6.95638	6.82986	6.16551	6.07405	6.49792	6.07889	6.55541	6.95642	5.67739	5.92825	7.23939	7.4847	5.76319	6.22553	6.58122	7.17746	7.53876	6.03262	6.51817	7.48295	6.67904	6.34853	6.38	6.60226	5.59889	7.18423
TMX2|51075	6.18336	6.34693	6.61116	6.61289	6.84371	6.67743	7.00876	6.56028	6.90932	6.54694	7.30936	6.42052	6.03086	6.82128	6.72779	6.28259	6.39717	6.74809	7.51341	6.82825	5.71732	7.06005	8.29941	6.43431	6.16442	6.04711	6.10439	6.21556	6.9241	6.3599	6.84344	5.83175	6.45091	7.54144	7.08364	6.4307	6.56873	7.44123	7.56846	5.72634	6.00757	6.85735	7.05797	6.10298	6.90025	6.52947	6.56739	7.60427	6.89456
GHITM|27069	6.22127	7.29948	6.66305	7.24516	6.6908	8.0135	7.50312	6.77068	7.20096	6.64039	7.30695	7.49681	7.4995	8.73431	8.07894	6.89379	7.6881	6.74631	7.25123	7.83145	7.65466	7.3737	6.97656	8.27402	6.68071	7.12918	7.14484	7.01836	7.29268	7.18098	7.47717	6.37459	7.29759	7.95474	7.16087	7.28678	7.44201	7.60367	6.8898	7.39126	7.10826	7.20944	7.57515	6.7107	9.0504	7.02292	7.3777	7.52997	7.25002
C18orf32|497661	6.15988	7.1407	6.49539	6.88495	6.78576	7.57879	6.71265	6.25774	6.35791	6.79305	7.4305	7.33421	7.32489	7.14972	6.52307	6.46957	7.4876	7.15175	5.85072	7.24214	6.71925	6.30444	6.08337	7.42245	6.68377	7.61838	7.32551	6.47954	6.31688	6.17211	7.03849	6.65634	6.02457	7.33309	7.62531	6.30397	6.65141	7.87259	6.67454	6.888	6.84377	6.70541	7.40791	6.20393	5.94974	6.89598	6.6082	6.70611	6.00151
HNRNPU|3192	7.44764	7.72183	7.57117	8.04563	8.38418	7.88703	8.07675	7.68114	7.62405	7.40132	8.11857	7.49339	8.7904	8.4687	7.5366	8.00671	8.57824	8.39008	7.81512	7.81289	7.91861	8.30497	7.64979	8.16227	6.90292	7.96562	8.76858	7.57696	7.93486	7.94808	7.88126	7.05203	8.49233	8.94412	8.00632	8.33903	7.91083	8.53229	8.24874	8.32146	7.67832	8.4402	7.62535	7.35063	8.37657	8.63345	7.6459	7.54104	7.74862
TOMM5|401505	6.59363	6.77097	6.59373	7.06	7.47621	6.57188	7.02129	7.25222	6.28199	6.84672	6.23857	8.88722	6.97648	7.43995	7.15958	6.59482	7.3628	6.82278	6.81311	6.14848	6.87133	7.39594	8.09728	6.66282	7.28874	7.84943	7.43127	6.94672	7.11861	7.49015	7.71655	6.4139	7.56957	6.24184	6.64999	7.1414	7.2359	6.71464	8.10583	7.30986	6.21394	7.19797	5.94603	6.46847	6.83049	6.79151	6.71842	6.89814	6.52825
CANX|821	8.01468	8.59356	8.4085	8.90459	8.56166	8.52612	8.94838	7.80898	8.13671	7.6976	9.28264	8.0633	8.67666	8.7485	8.90699	8.26202	8.32674	8.01989	8.665	8.61094	8.35926	8.79831	8.00295	8.32065	7.52645	7.79335	8.32266	7.48538	8.33474	8.46413	7.98854	7.13318	7.97349	9.40673	8.80403	8.97732	8.81782	10.4484	8.04455	8.64476	8.75355	8.65553	9.26455	7.79446	8.79386	8.71071	7.94917	7.93408	8.04479
RAVER1|125950	5.33454	5.33669	5.65321	4.9299	5.1739	5.09406	5.63258	5.80879	5.37308	5.34482	4.6708	5.70249	5.86832	5.70064	4.69008	5.06318	4.83904	6.60852	5.48551	5.96035	5.59036	4.59535	4.96226	5.59661	5.18251	5.77355	5.80816	5.62973	6.10804	5.57384	5.60946	5.51486	6.0077	5.78858	5.05194	5.36731	5.17627	5.12785	5.72948	5.75829	4.91105	5.46187	5.53477	6.43514	5.46126	4.80901	5.50284	4.99182	5.39932
URM1|81605	5.17797	5.98029	5.84652	6.15716	5.73312	6.18306	6.95723	5.35236	6.48591	5.75464	6.38027	5.33828	7.07832	6.05287	6.20167	6.0147	5.97072	6.16105	5.53407	6.10961	5.92389	5.0874	6.03812	6.94057	5.92047	6.06402	6.46014	6.0177	6.68704	6.49775	6.19796	7.22877	5.92966	5.72664	5.38973	6.46787	5.8506	6.47163	7.07666	5.82676	6.87799	5.49657	6.14961	7.45235	5.56436	5.8228	5.87741	6.44777	6.41406
PDIA3P|171423	7.28378	6.71572	7.62566	6.60653	7.29065	6.26949	7.57421	7.74291	6.90054	6.51545	7.42728	7.67862	7.73108	6.61765	7.34724	6.98948	6.93783	6.93868	7.30081	6.95653	6.24455	7.57029	6.89526	6.93244	7.39584	7.08995	7.34205	8.06039	7.43332	6.46221	7.64438	6.52958	8.45341	7.73659	6.88698	7.11366	7.52155	7.96382	7.20289	7.05521	7.32938	7.82011	8.30854	6.85474	6.69137	7.1549	6.60074	7.28436	6.39183
TAPBP|6892	6.95951	7.3113	6.90351	6.77929	6.56596	7.40633	6.48926	7.01461	6.05261	6.93763	6.58216	7.0013	6.94998	6.741	5.88663	6.29215	6.37869	6.49583	6.39757	6.68971	6.46878	6.44702	6.02365	5.50234	7.54984	6.7203	6.70964	6.62387	7.25611	6.70331	6.36345	7.12965	7.76002	6.81591	6.31643	7.21396	6.24243	6.90324	6.50107	6.50193	6.69987	7.04831	6.24665	6.31028	6.4265	7.1186	7.43994	6.26478	6.34122
PSMG2|56984	6.04971	5.69539	6.3174	6.7722	6.83959	6.44679	5.95243	5.9254	6.10457	7.33146	6.234	7.42221	6.95319	6.60716	5.56539	6.13523	6.47877	6.52133	5.69368	6.33343	6.59871	5.64019	5.62774	7.25519	7.50307	7.25962	6.37546	5.86292	7.21065	6.99309	6.58949	5.92032	7.03818	6.08339	6.76724	5.89157	6.20352	6.90633	6.97705	6.67077	6.18273	6.41489	6.43642	5.95715	6.69913	6.58177	6.03486	6.44689	5.6585
PRKACA|5566	6.65872	6.57941	6.11208	6.5601	6.6939	5.78268	6.13482	6.48861	5.97293	5.84608	6.08388	6.26579	6.3089	6.67118	5.77589	6.51153	6.13227	7.11015	6.75401	6.7245	5.99566	6.10008	5.54039	6.40554	6.18586	6.62466	5.98306	6.81945	6.24787	6.25615	6.26368	6.26693	6.58993	7.09443	5.87385	6.33264	6.50984	5.85727	6.00973	6.25383	5.95982	6.12084	6.43755	6.85418	7.7003	7.17142	6.24547	6.2031	6.75434
ERCC1|2067	5.75236	5.81623	6.32544	5.12114	5.85933	5.60138	5.8675	6.02831	6.582	6.09966	6.02844	5.73024	6.40355	5.87605	6.12756	6.54408	6.47657	5.90877	5.93013	4.92435	6.0545	5.33646	6.85151	5.71016	6.78867	5.89722	5.7763	5.48379	5.63417	6.70293	5.09151	6.12862	6.0169	5.43827	6.14854	5.55376	5.79527	5.99228	6.32513	5.95109	6.6601	5.92865	6.18827	6.47783	5.43306	5.94227	6.71289	5.75346	6.28879
ARHGDIA|396	7.55003	8.85848	8.94309	7.95701	8.25007	8.91779	7.66319	8.6082	8.33292	9.51952	8.3836	6.84175	8.08399	7.62407	8.02863	7.7246	8.27246	8.73749	7.84433	8.5073	8.57264	7.27912	9.54369	9.16802	7.56815	8.93788	8.4602	7.51153	8.28588	8.04372	8.88839	7.99906	8.26942	6.42724	6.81215	7.88596	7.02414	8.96508	8.37401	7.8292	8.02736	7.76303	8.58754	8.66749	7.58671	7.62723	7.88541	8.38008	9.18018
SLC39A7|7922	7.75663	8.13459	8.022	7.19183	6.62111	7.91374	7.92827	6.99048	7.44344	7.10993	7.9229	7.54246	8.32861	7.2214	8.4937	8.01831	7.39624	6.90566	7.01921	8.66088	7.42095	7.86043	7.30346	7.61042	7.28574	7.38331	7.56019	7.15953	7.05026	6.42696	7.20347	8.81349	7.73149	6.51937	7.08131	8.44474	8.59994	8.23191	7.66894	7.41658	8.1303	8.13752	8.87872	7.43136	7.66818	7.37197	8.40951	8.07784	7.07172
BCL7B|9275	6.28552	5.39919	5.20652	5.29972	5.25394	4.93211	5.73883	5.26839	5.11073	5.1784	5.25422	5.51151	5.72454	5.53111	6.02915	4.6511	5.69001	5.34485	5.50787	6.31096	5.28834	5.47151	5.26327	5.58997	5.3001	5.82728	5.54994	5.06458	6.88554	5.75785	5.52424	5.57866	5.69002	5.48555	5.51373	5.77753	5.31015	5.70245	6.17604	5.6859	5.59277	5.08927	5.39339	5.62707	5.19999	5.53216	5.58111	5.77455	4.93662
SFRS13A|10772	5.75574	5.96182	5.60849	6.35117	6.26379	6.08766	6.09309	5.26685	5.54624	5.70364	6.45137	6.29157	6.39503	6.4223	5.94264	5.86301	6.70549	5.71903	5.83369	6.10559	5.97906	6.03692	6.0151	6.35113	5.52662	6.60476	6.81078	5.60568	6.20247	6.68501	6.17559	5.66889	6.07126	6.35677	5.74028	6.14228	6.02497	5.9869	6.60214	6.41817	5.89408	6.29487	6.23853	5.7551	6.26078	6.74443	5.7414	5.87287	6.12209
PHC2|1912	5.80629	6.73973	6.54457	5.92043	5.96931	5.97641	6.198	5.95641	5.51877	5.89986	6.54894	6.37793	6.71213	5.09506	5.66577	6.0158	5.7768	5.97311	5.96783	6.47112	6.3166	5.39294	6.26657	6.32621	5.7021	6.73458	6.6871	5.75971	6.17845	6.53388	6.13329	6.07226	6.92792	6.53273	4.91731	5.88823	5.90461	6.4412	6.67983	5.82254	6.8396	5.97747	5.99567	6.60877	5.40035	6.03473	5.74063	6.63673	6.10754
NXF1|10482	5.37024	5.50774	5.16303	5.30862	5.80421	5.36998	4.50361	5.09341	5.27231	4.62152	5.45097	4.60279	5.41249	5.26874	4.05343	5.53712	5.30677	5.86596	5.64331	5.44281	5.4023	5.10116	6.41723	5.53916	5.04953	5.9937	5.6421	4.80785	5.35372	5.86863	5.7637	5.5223	5.33803	5.39597	5.16141	5.41604	5.06999	5.56286	5.6313	6.14288	5.24068	5.50321	6.34156	5.33498	4.83083	5.71887	5.39261	5.2919	6.08197
PPP1R8|5511	4.87521	5.25152	5.22423	5.67538	5.13836	4.99154	5.42828	5.10487	4.73588	4.93753	5.44925	5.59693	5.42617	4.84148	4.4262	4.88607	5.36735	5.24079	4.86189	5.60203	5.14655	4.75756	5.46867	5.72182	4.70687	5.64173	5.63923	5.01302	5.52971	5.43462	5.4995	5.0633	5.55562	4.87889	4.79784	5.10416	4.62946	5.45298	5.60402	5.20958	5.38026	5.65823	5.35056	5.36916	5.11083	5.74492	5.09929	5.30235	4.98591
OTUB1|55611	5.56104	6.32225	6.35016	5.93897	6.33383	7.25963	5.96221	6.6589	6.18907	6.20204	6.0986	5.50047	5.77356	5.99743	5.59763	6.23765	6.56465	6.4558	7.07832	6.14266	7.13217	6.47891	8.5322	6.79832	6.21542	6.27616	6.18439	5.82857	5.62634	5.98807	6.6773	6.36351	5.63076	5.84564	6.00526	5.57865	6.06903	7.34296	7.22762	6.34877	6.67244	6.24251	6.49227	6.46697	5.86361	6.36021	6.34967	5.77538	6.8568
ANXA2P2|304	7.8802	8.10782	8.01648	9.18616	9.32724	8.9088	9.46361	8.72397	9.21343	7.08019	8.77189	8.60908	8.47038	7.23999	9.13578	8.56335	8.44021	9.62873	9.87467	9.15443	8.45835	8.93729	8.11109	9.45824	8.53766	8.17304	7.76267	8.68702	9.32262	8.49478	8.18222	7.79078	9.07534	8.80099	8.08309	7.99967	8.83003	8.90952	8.2822	8.02602	8.66207	9.06162	8.75669	8.9978	8.41289	9.07678	7.0366	8.70445	8.09908
CSK|1445	5.1999	5.84334	5.74097	6.03885	5.64982	5.83224	6.00367	5.22852	5.38714	5.47999	6.17455	5.54685	5.81746	5.57576	5.63417	5.05369	5.77823	5.6367	6.50242	5.88182	5.82936	5.57037	5.29934	5.81025	5.32993	5.32562	5.67006	5.68018	6.05017	5.89	5.45766	5.95529	5.99606	5.01807	4.16146	5.73572	5.12243	5.98378	5.82475	5.64545	5.60676	5.42553	5.42741	5.71674	4.79556	5.97172	6.47531	6.04297	5.5853
SELK|58515	5.89047	5.23856	5.63325	5.90206	5.59419	5.6453	5.80887	6.4981	5.73112	6.41247	5.77356	6.68724	4.94177	5.04655	5.71954	5.68431	6.55763	5.58063	6.50144	5.52511	5.90008	6.01756	5.36428	5.00054	6.45352	6.24094	5.35481	6.73432	6.349	6.503	6.51281	5.80097	5.87612	6.16396	5.90577	6.05875	5.29968	5.51788	5.87885	5.51731	5.6057	5.38786	5.91255	5.41586	6.03292	6.67529	5.61483	5.87544	6.56211
MYO9B|4650	5.61404	5.98185	5.88641	5.8513	5.48498	5.04265	5.6375	4.93578	5.15463	5.25545	5.76854	5.19149	5.79819	5.84775	5.06828	5.25802	5.43629	5.88601	5.81881	6.37971	5.69867	4.90918	5.12115	4.97277	5.10728	5.61634	4.35268	5.35753	5.49293	5.8959	5.39934	5.71199	6.30171	4.87541	5.15304	5.71113	5.49004	6.04653	6.30979	5.36962	5.68661	5.82886	5.43628	6.15074	6.31072	6.3927	5.73704	6.38779	5.68986
MMADHC|27249	6.52988	7.01088	6.68487	7.2866	7.30698	6.85959	7.37357	6.38685	7.22093	6.62698	7.21291	6.34724	7.47753	7.30175	7.55169	6.22781	7.04095	6.81404	5.80983	7.07908	6.16715	7.41988	6.67779	7.30269	5.93743	6.62407	7.30223	6.64004	6.35213	7.03363	7.18124	6.78991	6.86646	7.75592	6.67043	7.39094	6.94636	7.49647	6.9603	7.1171	7.00513	7.2417	6.8612	6.6872	7.77128	7.32775	6.65752	6.96153	6.90622
MKI67IP|84365	4.76878	5.28083	5.66843	5.15931	6.14234	4.79926	5.99337	5.67177	5.54673	5.61067	5.43609	5.12168	5.75237	6.10272	5.62439	5.54709	5.91067	5.56066	5.64068	5.44381	5.53744	5.82448	5.87873	5.89632	5.11481	5.28316	5.7956	5.32119	5.88921	5.11221	6.05254	5.15742	5.36581	5.97357	5.46403	5.53968	5.22211	5.77014	6.47552	5.70486	5.01368	5.7952	5.52295	5.55102	6.43529	5.62374	5.45311	5.24333	5.87075
RNF40|9810	4.99741	6.49332	6.06152	5.23411	6.07076	6.41768	6.06643	6.05632	5.72506	5.79642	6.0073	6.35393	5.57259	6.31917	4.87111	6.12391	6.32182	5.9981	6.13264	5.93821	6.04071	5.74805	6.2354	6.30311	6.32348	6.36819	6.32217	5.68272	6.79477	5.40881	6.16946	6.12578	6.16573	5.36604	5.37649	5.68987	7.02814	6.12018	6.61787	6.24618	6.09607	6.12628	6.15429	5.98052	6.2667	5.378	6.13661	6.7532	6.18774
GTF3C2|2976	5.22848	5.58335	5.51277	5.31546	5.71699	5.51839	5.7941	5.37622	5.12596	5.42541	5.47165	4.95586	6.05505	6.18001	6.0099	5.59677	5.75149	5.68501	5.76789	5.86974	5.40239	5.76278	5.54112	6.34752	5.31474	5.59984	6.7867	5.59277	6.42569	5.06332	6.16816	5.51759	6.4623	6.20913	5.69026	5.80454	5.04911	5.94043	5.4559	5.63979	5.4663	5.69584	5.59106	5.81419	5.92051	5.78484	5.63276	5.67716	5.68321
MAP2K2|5605	5.47433	6.68101	6.44016	6.1345	5.77411	6.49346	6.82091	6.67096	6.40737	6.29446	6.37932	6.08384	6.30452	6.1328	6.26953	6.26566	6.60627	7.67276	6.86119	5.64216	6.87973	5.57195	6.0895	6.25808	5.88311	6.18475	5.468	6.50412	6.06483	6.47027	5.74323	6.18206	6.4083	4.7115	5.5358	6.51655	6.18883	5.85345	6.88279	6.56374	5.79015	6.02109	6.39247	7.29401	6.08457	6.21148	6.52247	6.15146	6.69539
PSMD8|5714	7.11184	7.41039	7.25932	7.74353	7.24128	7.80621	8.19188	7.3547	7.97733	7.92186	7.7723	7.28905	7.58807	7.42267	7.96927	7.46109	7.84601	7.56051	7.2283	6.76165	7.47901	6.51999	7.51907	7.98571	7.16187	7.32813	7.79305	6.56131	7.01033	9.8754	7.16629	7.25239	7.78883	7.57206	7.44788	7.14496	7.58186	7.03183	7.58395	7.32874	7.6419	7.12678	8.1752	7.66132	8.39641	9.60567	7.09799	8.31384	7.79987
YWHAG|7532	6.91812	6.72672	6.59727	7.63203	7.20842	6.57214	7.48598	6.19625	6.62019	6.44941	7.32023	6.36756	7.28721	7.42234	6.82813	5.9303	6.9155	7.42312	7.11656	7.8291	6.39621	7.13788	7.03593	7.56099	5.91057	6.81845	7.10719	7.02079	7.17913	6.8558	7.46296	6.6998	7.1457	7.57396	6.87586	7.63667	7.01832	7.60862	7.31212	7.20082	6.61666	7.2215	6.66849	7.12776	7.37164	6.86087	6.62527	7.1806	7.40577
UBAC2|337867	6.12032	5.3668	5.82609	5.98423	5.36762	5.92203	6.40375	5.78307	6.50459	5.63384	5.90992	5.54742	6.24005	5.97088	5.24585	5.40405	5.59816	6.01655	5.36689	5.63785	5.60065	6.08835	6.42555	5.91987	5.69026	6.1193	5.40219	5.22246	7.0701	6.30187	5.39547	5.72058	6.01712	5.09271	6.22795	4.66837	6.11455	6.49687	6.91743	6.33155	5.25519	6.02274	6.08213	5.76948	5.56062	5.94165	5.00732	6.24413	6.04556
ARL6IP5|10550	7.40584	7.05668	7.14139	7.91211	7.50997	7.12725	7.11016	6.82493	6.95539	7.483	8.22114	7.37691	7.22922	7.15665	7.7305	7.48635	7.72285	6.7879	7.33698	7.22385	7.05317	8.1859	6.37033	6.91969	6.90616	6.9409	7.18933	7.12117	7.18835	7.19616	7.54687	6.64533	6.97779	8.20905	7.59809	7.13368	7.08195	6.79658	6.86915	7.07186	7.48147	7.1606	7.36166	7.13906	5.75194	8.1585	7.59802	7.26401	7.17637
MRPL40|64976	5.52266	6.42713	6.0569	5.35488	6.54876	5.3842	7.01375	7.01958	6.6443	6.81904	6.01492	7.11433	6.26726	6.46425	6.6005	6.42033	6.51747	5.3182	6.76862	6.13309	6.02394	6.61906	6.12354	6.70015	6.55564	7.16299	5.75744	6.77187	6.48335	5.78417	6.98227	5.71276	5.70617	6.22068	6.13345	5.87805	6.48783	6.02699	6.7816	6.46134	6.77294	6.47136	6.86436	5.70361	6.63628	5.87011	6.34587	6.11484	5.50138
C21orf33|8209	6.15293	6.57373	6.4132	5.73077	5.929	6.46091	7.11195	6.69456	6.50551	6.81691	7.17725	6.66673	6.36858	7.2716	6.57524	6.13395	6.65238	6.36772	6.6443	5.68936	5.97793	6.80463	7.3129	5.56278	6.10176	6.00118	6.24986	6.66954	7.10428	6.14769	6.57452	5.38903	6.85474	6.03063	5.48364	7.04102	6.91297	6.54577	6.58454	6.29385	6.69751	6.88058	7.17136	6.80571	7.07579	6.11702	5.88563	7.12668	6.35413
PPP2R5C|5527	6.0763	6.46555	5.9279	5.92587	6.25616	5.76714	6.52301	5.80505	6.04388	6.10083	6.10856	6.48992	6.49698	6.30971	6.87595	6.22724	6.2866	6.72706	6.16423	6.991	6.05761	6.47458	6.54595	6.7253	6.4334	6.02551	6.7238	5.95337	6.2644	6.51794	6.12779	5.38187	6.62624	6.94363	6.91423	6.14711	6.25282	5.89046	7.53474	6.09191	6.94726	6.7431	6.07121	5.29469	6.76463	6.94585	6.44109	5.95961	5.41157
CDK4|1019	6.29102	9.31012	7.09021	6.69514	7.25188	7.27828	7.42367	7.07156	7.61423	6.82503	7.16969	6.84596	7.50271	8.04478	6.42403	7.14253	7.50059	7.70221	6.92503	6.31578	7.35717	6.81915	8.09466	7.56353	6.50722	7.9618	7.82944	7.47603	6.54771	7.24694	7.68402	7.21322	8.27743	6.86942	6.89984	7.32303	7.44659	7.66977	7.36569	7.37232	7.46552	6.89654	6.92779	7.57777	7.55147	7.19808	7.65289	7.28475	9.98676
UNC45A|55898	6.22046	4.99347	5.51533	5.20441	5.64475	6.1505	5.68979	5.64007	5.42803	4.86953	5.50502	5.37295	5.92083	5.33656	5.09335	5.54479	5.15527	5.525	5.64506	5.52754	6.01248	5.5646	4.73982	5.81934	5.41268	4.90137	4.85548	5.49372	5.569	5.32771	4.96106	5.5371	5.41418	4.55736	4.34524	5.13958	5.62359	5.80867	7.18456	5.42789	6.22341	5.20787	5.79973	5.22145	4.97789	4.77393	4.79444	5.38976	5.55348
RRAGA|10670	5.95946	6.75895	6.3413	6.4562	6.54313	6.45772	5.91622	6.72492	7.24985	6.02583	6.01923	7.16031	6.92376	6.43252	6.29677	6.72296	6.35058	5.93856	6.0509	6.08879	6.238	6.83335	6.51662	5.6175	6.8319	6.96488	6.89888	6.18606	6.19026	5.90036	6.65778	6.0026	6.25131	7.86142	6.12025	5.60221	6.77193	6.78707	6.75445	6.79096	6.23778	6.63396	6.099	6.22283	6.57819	6.65858	6.05872	6.82667	6.2401
ZNF622|90441	4.067	5.02121	4.5686	4.97796	4.96017	5.32249	5.61883	4.7612	4.83369	4.5648	5.46779	4.9872	5.00843	5.29263	5.5053	5.09548	5.53578	5.62405	5.7166	6.113	5.11485	5.15177	5.5995	4.90379	4.77041	4.69954	5.11123	4.56832	4.59561	4.53387	4.88826	5.55666	5.1948	4.81623	4.89209	5.46483	4.71951	5.14297	5.46828	4.83949	5.19468	5.55981	5.58023	5.043	5.26054	4.65528	5.21019	5.38805	5.59749
CSNK1D|1453	6.75374	7.91756	7.30188	6.91305	6.78955	7.89259	6.7479	6.7166	6.62143	6.7803	7.40471	5.6577	7.39536	6.51024	6.35198	6.65685	7.58664	7.22677	6.44899	7.37309	7.05913	6.70972	7.62951	7.81985	6.31658	6.94928	7.56682	6.22877	7.42988	6.81192	8.65364	6.67344	7.13363	6.07027	7.05007	7.38738	6.36445	7.59039	7.1973	7.06464	6.40181	6.88088	7.45485	6.8961	6.84348	6.93057	6.57547	7.02823	8.10292
TSN|7247	5.12959	5.99521	5.51257	5.81148	5.86445	5.51495	6.57988	5.10636	5.81769	5.7125	5.83918	5.33629	6.28479	5.96828	6.08055	5.5783	6.34603	5.6708	5.64242	5.99119	5.72359	5.94208	5.7753	6.02147	5.22477	5.21808	6.26415	5.42072	6.42052	5.78758	6.12758	5.63959	5.93174	6.48349	6.0384	6.07678	5.65692	6.43639	6.82441	5.94909	5.70455	5.70532	5.70938	5.71224	7.01698	5.95408	5.74837	5.6351	6.04667
GRINA|2907	8.01638	8.25426	8.76294	8.87241	9.17951	8.971	6.72498	9.6601	7.91637	8.26857	7.53401	7.58008	8.04215	9.22476	7.65901	8.16986	6.85366	8.38055	8.2042	7.78562	7.93306	8.07532	9.21421	7.10973	8.2251	7.81745	8.78169	7.87739	8.22789	8.6306	8.6707	8.32503	7.59079	8.31987	8.80068	8.2971	8.0082	8.60154	7.58683	8.55562	8.19509	7.8039	7.52692	8.5923	7.81208	8.27591	8.31675	7.76788	8.64506
RNF149|284996	5.64036	5.0741	5.01693	5.40511	5.76448	5.24444	5.49645	5.41746	4.98818	4.73948	5.2881	4.69271	5.44498	5.58867	5.26815	5.73093	5.62681	5.7174	6.27568	5.51091	5.23856	5.76084	5.22343	5.33951	5.01627	6.21213	5.66372	5.04892	6.03789	5.65834	5.64354	5.31209	5.89147	6.0345	5.18629	5.39246	4.77757	5.86384	5.85329	5.68696	5.79711	5.42161	5.61337	5.25724	6.15326	5.76345	4.98421	5.4021	5.62088
MYEOV2|150678	6.48957	7.54188	7.39688	6.86633	7.54207	7.22343	8.02587	7.09238	7.09259	7.46871	8.57215	7.23681	7.16685	7.29497	8.57931	7.29359	7.52602	6.3068	7.17739	7.51174	7.1883	7.36258	8.43391	6.41264	6.88775	7.25369	7.39456	8.07662	7.86543	7.38162	7.27133	7.9844	6.92567	5.90942	7.24432	7.19178	7.37583	7.16393	8.12297	7.21037	7.50709	6.87253	7.52345	8.63443	6.66278	7.1529	7.7709	7.41396	7.8524
RPS3A|6189	7.9217	9.01153	9.20688	8.72077	9.4507	9.09572	8.92521	7.66381	9.93625	9.62005	9.23604	8.35389	9.28107	8.90283	9.0203	8.80577	9.69264	8.00791	7.96437	8.41044	9.74066	9.67066	9.44419	9.29463	8.12027	10.467	9.19374	8.67242	7.69753	8.9897	8.42666	7.7169	7.96386	8.38556	8.32402	8.56644	9.34199	8.47756	9.33272	9.6002	9.24055	8.95457	8.58048	8.76705	9.5342	9.33489	9.61393	8.91398	9.12301
MIF|4282	9.62723	9.30226	10.1741	8.28717	8.99818	9.13448	10.7305	11.6933	10.3125	11.2476	9.61483	8.91963	9.53907	9.62918	9.21796	10.3756	10.4386	10.1608	8.991	11.2043	11.0695	9.79123	10.2352	10.4073	9.80207	10.3512	9.9386	10.9438	10.1896	10.1396	9.03268	9.68874	9.17759	10.0167	8.28896	8.8357	10.1709	8.81521	9.38485	9.36816	10.4462	9.32633	10.279	9.89608	8.71004	9.07516	10.2995	9.47487	11.0477
ATP6V1D|51382	5.6397	6.50106	5.75469	6.46742	5.53576	5.2958	6.90086	6.14938	5.4408	5.62808	6.23509	6.44173	6.39844	5.9774	6.66871	6.22894	6.12137	5.77482	6.71693	6.66573	6.18588	6.60201	6.23545	6.86327	6.63424	6.25257	6.30857	6.2133	6.89752	6.34745	6.63894	5.51774	6.10642	7.09312	6.58409	5.82326	6.48193	6.46411	6.06457	5.92942	6.40994	6.33362	7.05964	5.56512	6.31492	6.45721	5.60948	7.94408	5.6139
PA2G4|5036	5.67745	7.08294	6.4941	6.44728	7.23835	6.74523	7.27814	6.85085	6.64413	6.80398	6.4304	6.40149	7.43004	8.24597	6.85217	6.80347	6.57623	6.89436	6.9215	6.5387	7.43594	7.5346	7.30065	7.87138	7.03389	7.63606	7.27398	6.52301	6.28449	6.6096	6.94071	6.6924	7.26586	6.27085	5.97059	6.51861	7.00963	6.88115	6.37623	6.95799	6.94387	6.75279	6.77361	6.82515	7.10788	6.87303	6.85645	6.86334	6.08043
CHCHD1|118487	5.67886	5.83563	5.97475	7.10025	7.16394	6.55445	5.80281	6.21816	6.92155	6.83831	5.94828	7.06793	6.03045	5.16299	6.77516	6.08915	6.05467	5.40906	6.52376	6.08316	6.69105	6.20254	6.40659	6.3884	6.54153	6.90735	7.01753	6.25749	6.1838	6.33108	6.41165	7.09616	6.63003	5.6869	5.93569	5.62374	5.96726	6.53217	6.0284	6.05325	6.18546	5.70412	6.58697	6.68866	7.792	6.14724	7.45647	6.25819	6.12126
MTIF3|219402	6.2095	6.77927	5.73993	6.3099	5.99747	6.33241	6.52871	6.18649	5.85662	5.89767	5.41166	6.172	6.2866	6.21864	6.54793	6.86007	6.49372	5.46834	5.56377	5.98516	5.67813	6.08308	5.51546	6.47315	7.06471	6.11223	6.37401	5.47776	6.14494	6.39792	6.0663	6.19399	5.4713	5.56768	6.7635	5.44264	5.7185	6.84919	6.25626	5.74808	5.39057	5.90404	6.60612	6.27203	5.74091	6.50632	6.24229	6.38341	5.69673
NDUFB6|4712	5.99152	6.3815	5.81368	5.9221	6.13299	6.15394	6.46219	6.38567	6.4265	6.25378	5.42944	7.61812	6.48651	6.43976	6.75381	6.53045	6.01107	5.39721	6.06636	5.71031	6.31987	6.30992	6.29494	5.23453	6.46874	7.00258	6.68047	6.26152	6.05594	6.50234	6.52636	5.6391	5.92153	5.4377	6.14017	5.15553	6.57714	5.85166	6.09442	6.47997	6.04691	6.12958	5.58652	5.82523	5.84033	6.52407	5.97386	6.64617	6.87763
ZYX|7791	7.00742	7.25236	7.55761	7.77179	7.2998	6.16962	7.65424	7.50746	7.56966	6.94388	7.50151	6.89494	7.45679	6.30061	8.0512	6.41747	6.98957	7.68346	7.90687	8.63719	7.6289	7.26062	8.2215	7.26079	6.67707	6.8086	5.92923	7.67219	7.63953	6.88016	7.30522	7.82162	8.11466	7.57146	7.21185	7.37965	6.37172	7.57135	6.95985	7.45913	7.98448	8.00298	8.36129	7.61022	8.03222	6.82452	7.36961	8.3277	7.19142
WBP1|23559	5.85792	7.39103	6.99801	5.63114	6.32815	6.97481	6.76264	7.19471	6.18092	8.29944	6.61827	6.50731	7.52054	7.40017	6.92989	7.32166	7.09335	5.70386	6.1425	6.8335	6.35804	6.8192	6.15486	6.91756	6.8136	7.51544	7.63526	6.9889	7.74348	6.33993	6.62923	7.64275	6.56859	6.70619	6.31881	6.71144	6.3305	7.24251	7.46015	6.85653	7.2496	6.0338	7.29303	7.43471	6.33305	6.24346	7.35953	7.04454	6.75952
MRPS18C|51023	4.78325	5.38084	5.17772	5.39446	5.28811	5.4041	5.50183	5.29783	4.10895	5.08598	5.37637	6.09737	5.18289	5.55287	5.65161	4.61969	4.98454	4.97011	5.61502	5.26949	5.32974	5.03699	5.29315	5.83017	5.21803	5.94771	5.56705	5.17956	4.86569	5.59336	5.50284	4.69235	5.52346	5.97096	5.11044	6.04267	4.71821	6.09946	4.52352	5.03592	5.58651	5.19971	5.77597	5.47037	5.11803	5.22332	4.91622	5.50907	5.87054
FIS1|51024	6.4898	7.17681	7.29241	7.13154	7.12376	7.19858	7.60919	7.34292	7.77091	7.8592	7.46336	7.55557	7.99588	7.42529	8.53858	6.76169	7.05965	6.13674	7.36762	8.03748	7.58956	6.56909	7.3792	7.49244	6.90223	6.93388	6.52672	6.90816	6.94913	6.74793	6.66226	7.72003	6.81373	5.15189	6.87	6.3073	7.71649	7.48572	7.63112	7.53852	7.69374	6.60455	6.59411	7.60979	6.19509	6.76891	7.6569	7.82167	7.19265
CSNK1A1|1452	7.25342	8.27887	7.26491	7.23103	7.46963	8.22694	8.32742	7.1204	6.82754	6.76972	8.1122	7.3767	8.21743	7.89484	7.7918	7.89685	7.72983	7.13308	7.42817	7.92449	7.83019	7.74176	6.98018	7.95004	7.65822	7.46555	8.48288	6.513	7.14349	7.90173	7.87667	6.92376	7.608	8.96791	6.82683	8.57301	7.84274	7.30942	7.398	7.95523	8.19926	7.27853	7.54978	7.20905	7.86991	8.02203	7.53806	7.55308	7.24582
FBXO7|25793	5.8873	6.30119	6.08162	6.72874	6.81584	6.76659	6.43823	6.23654	6.71971	5.76035	6.07269	6.18632	7.10016	6.88151	6.9511	6.25872	7.41871	6.53309	6.62795	6.8861	6.46947	6.17741	6.38219	6.56792	5.59844	6.4678	6.12404	6.20506	7.36174	6.92398	6.00222	6.02088	6.42926	6.21726	5.15911	6.32111	6.40264	7.00039	6.58399	6.3539	7.5629	6.70124	5.54813	5.73821	6.153	6.8406	6.46274	6.44009	5.61212
DNAJB11|51726	6.43272	6.26643	6.035	5.89751	5.93178	6.09278	7.33055	7.40347	6.30824	6.18704	6.40237	6.15732	6.35444	5.8121	6.66644	6.20727	8.26668	6.9571	6.68208	6.45439	5.92252	6.48	5.55669	5.52571	6.40431	6.3198	5.38789	6.87785	6.92935	6.00425	6.90413	6.30933	6.97075	5.88272	5.93101	6.18234	6.36128	7.45221	6.71823	6.5795	6.15502	6.43982	6.25916	6.28242	7.66024	6.67519	6.37243	6.66122	6.20714
MLST8|64223	4.58471	5.97873	5.12885	5.30969	5.33428	5.59368	4.97766	5.27022	5.37192	5.50678	5.57507	5.76861	5.28823	5.90311	5.16653	5.37128	4.54601	5.26922	5.08366	5.10179	5.70782	5.3683	4.6005	5.73641	5.22362	5.72471	5.57228	5.14648	5.70547	4.65968	5.49512	5.77317	5.4595	4.3082	5.28063	5.56507	5.95987	4.61226	5.08747	5.92382	5.73722	5.64112	5.30354	5.35886	5.53406	4.49437	6.16646	5.45208	5.88216
RNF130|55819	6.10085	6.99668	6.51881	6.72642	6.47641	5.76259	6.15778	6.50372	6.86483	6.28959	6.84741	6.02243	5.93165	5.7397	6.2958	6.03622	6.35062	6.17148	6.80053	6.58181	5.90493	6.1621	6.69263	5.21753	6.57444	6.5447	7.28903	5.96959	7.55872	6.78203	6.65968	5.8676	6.44149	6.48696	6.9998	6.66862	6.45421	8.4402	6.65037	6.14377	6.594	5.97401	6.503	6.14925	6.34778	6.93554	6.42316	6.21367	6.37784
OSTF1|26578	5.89385	6.29977	5.49471	6.31358	5.87522	5.17021	6.72016	5.49761	5.33491	6.15662	6.25394	6.46816	5.56378	5.7253	6.01335	5.74637	5.89904	5.9122	5.99128	6.32104	5.66431	5.51742	5.87729	5.18565	6.27309	6.38972	6.37786	5.72689	7.58907	7.06188	6.22245	6.20579	5.87651	6.21112	6.18724	6.5736	5.94805	6.04151	5.55424	5.89448	6.27783	6.13667	5.56114	6.05669	6.25793	6.64129	5.7194	6.14743	6.39919
SERP1|27230	7.25505	8.04607	6.46919	7.04604	6.70105	6.64041	8.0578	6.30255	7.22622	6.87572	7.07747	7.46841	6.66297	7.31673	7.25908	7.79264	6.0688	7.91741	6.45925	7.89291	6.7594	7.06771	6.74446	6.5371	6.41659	6.72891	6.9321	7.29644	7.43582	7.14065	7.62496	7.10377	7.26052	7.94344	8.1391	7.15247	7.63068	7.44592	5.44076	6.84916	6.95597	6.67962	8.00906	7.08729	7.49175	7.62457	7.06524	6.63586	6.6732
AKR1A1|10327	7.8947	8.16117	8.01875	8.25985	6.41463	7.08146	8.06951	7.67471	7.94638	7.39549	7.80588	8.99205	7.21085	6.84973	7.45843	8.49052	7.10581	6.67643	8.41182	8.84077	7.19741	7.31343	7.12046	7.05495	7.40141	7.72539	7.75536	7.39458	8.98386	8.1411	8.56583	7.78856	7.73441	7.73125	7.5558	8.50245	7.80084	7.76146	8.86939	6.40618	7.80796	7.42465	8.76756	7.46891	6.35398	7.63281	8.24294	7.64114	6.61061
NDUFS2|4720	7.02152	6.61465	7.9886	7.73937	7.78033	7.53306	7.09584	7.17957	7.35422	6.88327	7.30595	6.73162	7.68584	7.88982	7.59457	7.0013	6.85181	7.92383	7.27586	7.23932	6.68393	7.70557	7.2118	7.18277	6.60453	6.96261	7.07196	7.13468	7.72423	6.745	7.28323	7.0017	7.66789	6.9134	7.11094	7.14245	6.67196	7.08138	6.17809	7.52047	6.77205	7.53998	6.98047	6.67677	6.35737	6.4267	6.28269	7.14788	6.80747
VIM|7431	9.40688	10.1622	10.0785	10.1335	9.98501	8.53808	8.91373	9.66263	9.12976	9.79837	10.215	7.64614	10.0539	8.71015	8.81864	9.62559	9.46284	8.83761	9.57678	9.73544	10.5359	8.99222	9.53326	9.08829	10.1506	9.91515	8.64257	10.011	9.01531	9.50796	9.69931	9.63296	10.7857	9.10296	9.0112	9.25518	9.17197	10.4343	8.7592	8.91195	10.2528	9.74559	9.13684	10.3371	9.88019	9.17726	9.81111	11.0024	9.21972
GARS|2617	6.66386	6.23919	5.82442	7.10581	6.5053	6.49983	7.23578	5.91418	6.52687	6.12599	6.65101	6.20004	6.62968	6.60929	7.11928	6.72896	6.53534	7.43571	8.18673	6.73447	6.18908	6.7124	6.72892	7.50954	5.75757	6.65029	7.14796	7.13715	6.19143	6.15643	6.67185	6.95421	6.71427	7.00187	7.5645	6.90223	6.19897	7.22564	6.60917	6.99778	7.20794	7.13693	7.25358	6.77934	6.77509	6.40996	6.27821	7.18186	6.08047
FAM120A|23196	6.34276	6.70649	6.79501	6.65445	6.79804	6.01987	7.2607	6.01174	6.03686	5.7203	6.32892	6.21015	7.42963	7.28298	7.00958	7.23609	7.45966	6.3342	6.83603	7.42273	6.21351	7.05536	6.09161	6.38184	6.13485	6.91952	7.05741	5.80837	7.27492	7.17135	6.82692	6.80022	6.24121	7.6827	6.9453	6.98271	7.0446	7.08844	6.53181	6.8427	7.30415	7.03927	6.26482	6.4267	6.70395	7.82244	6.42998	6.5561	6.60118
C22orf28|51493	5.7381	6.49938	6.2439	6.48813	6.2339	6.66724	7.08824	6.13448	6.32638	5.55479	6.11977	5.74421	6.78343	6.56415	7.0741	6.50227	7.08137	6.70916	6.80344	6.89005	6.5575	6.70539	6.52746	6.81883	5.14941	6.34931	6.75811	6.05121	6.80052	6.23359	6.28679	5.98627	6.49475	6.23138	6.02811	6.41833	6.58937	6.96746	6.52753	6.07793	8.24401	6.67682	6.67461	5.56223	6.25207	6.36572	7.10371	6.39974	5.91402
ITFG3|83986	5.3956	6.54223	5.80547	5.37731	5.73207	6.51448	5.94281	6.37226	5.65148	5.88311	6.09449	5.73055	5.5426	6.09077	5.30701	5.86918	5.6129	6.32406	6.68049	6.14653	6.01171	5.70084	6.1708	5.97787	5.98343	5.77731	6.79498	5.61564	6.32143	5.45183	6.06021	6.66311	6.59962	5.18126	5.44177	6.11344	6.22653	5.28818	6.34557	6.63391	6.63354	6.36962	6.03315	5.95332	5.95813	5.10546	6.3946	5.8985	6.72306
NINJ1|4814	6.08658	7.08804	7.49388	6.58303	6.8693	6.98234	7.39518	7.72196	6.62344	6.5418	6.87253	5.91209	7.1506	6.96341	6.78932	7.19218	7.7434	5.38673	6.93952	6.82007	6.79358	7.18581	7.20069	6.30218	7.01782	6.70904	5.92981	6.73308	7.7739	6.81654	7.09519	7.80787	6.22	6.3162	6.44369	6.66231	6.68391	7.21094	6.87186	8.04201	7.19721	6.85463	6.5923	7.07119	6.56147	5.81077	7.15732	6.78364	6.82641
HNRNPA1L2|144983	5.75602	6.86954	6.78638	6.23683	6.70616	6.24588	6.56336	6.48839	6.11018	6.33524	6.42506	6.62051	7.53445	7.15549	6.17096	6.51186	6.53036	6.25062	5.94817	6.08659	7.22866	7.14173	6.55176	6.90027	6.38479	7.39096	6.96623	6.30131	5.62252	6.82791	6.49413	5.8121	6.47128	5.63838	5.2746	5.95821	6.73147	6.18595	6.69199	7.13904	6.50907	6.56471	5.99389	6.23564	6.53506	6.74818	6.70857	6.59476	6.349
PRDX2|7001	8.60749	9.31919	8.79839	8.54897	8.54898	8.90498	5.86003	9.54685	7.73428	9.32155	8.68395	9.31171	8.50759	8.86964	8.49965	8.32125	8.3297	9.64064	8.44942	8.8662	9.13263	7.91834	7.59029	9.20318	7.73358	9.08525	8.57202	9.5669	8.38418	8.04749	9.0672	8.33901	9.24754	8.51912	8.62101	8.90534	9.64633	7.87799	7.49189	8.38042	8.03332	8.68119	9.77438	9.78609	8.96294	9.27354	8.49304	8.2736	9.05169
SNRNP200|23020	6.53693	7.32862	6.8712	6.73369	6.75278	8.58344	7.25688	6.13138	6.50273	7.76275	7.06338	6.14508	7.43496	7.15574	6.70372	7.19829	7.40897	7.38605	7.24454	7.08886	7.00248	7.29304	6.77027	7.1384	6.3747	8.27195	6.91219	6.34752	7.7272	6.84689	6.87544	6.92699	7.55453	6.92722	6.85837	7.38036	7.20581	6.78204	7.25988	6.80156	6.71939	6.84678	7.20529	7.11362	7.85864	6.81426	6.63761	6.72127	7.29415
COX6C|1345	9.29948	9.12869	9.25995	10.6232	11.7698	9.66624	9.83484	11.8915	9.44326	11.8902	8.95688	10.3675	9.6826	11.2388	10.3518	9.16737	11.1058	9.55976	8.33533	9.42389	11.1434	9.89284	10.368	10.9763	10.8868	9.94351	10.1468	9.81857	9.44039	10.8019	9.99519	9.69379	9.08162	9.8842	10.4893	9.98294	9.18427	9.57276	9.18156	10.3561	9.47319	10.0222	9.26355	9.65137	9.33073	9.96092	9.41496	9.15322	9.73564
RNF220|55182	4.91013	5.41936	5.82229	5.38471	5.2239	5.49613	5.55425	5.41923	5.58617	4.83439	5.43732	5.97496	5.59161	5.40984	4.93033	6.64493	4.97793	5.14275	5.91136	5.31983	5.77654	4.52197	5.14368	5.67061	5.23413	5.66498	5.20537	4.94771	5.61858	5.76764	5.99988	5.42312	5.9785	4.92347	4.49916	5.17566	5.55048	6.47938	6.50926	5.69421	5.52022	5.5914	5.64832	5.72378	4.8166	5.95652	5.90098	5.56278	5.23859
TSC22D3|1831	7.96063	7.25692	7.43188	7.2366	6.60379	8.4725	7.62394	6.89982	7.41407	7.008	8.03895	7.60242	7.53141	7.31477	7.21355	7.82335	7.75448	5.60368	7.77502	7.58539	6.59221	7.42206	7.3936	7.19566	6.75503	6.70064	7.22119	7.54787	7.07285	7.65511	7.50399	6.29459	6.75991	7.44619	8.46234	7.30861	8.16137	6.17153	7.70231	7.8653	6.80075	7.36806	7.41552	6.87296	7.89131	7.01157	6.70019	7.77191	6.43387
CNDP2|55748	6.69122	7.66983	7.23441	7.95212	8.09032	6.59644	7.33687	7.83205	7.16911	6.69534	7.32276	8.068	7.33693	7.73829	6.5166	6.16371	5.50722	7.0748	6.61596	7.06438	6.68499	6.7896	7.03989	7.27631	6.30395	7.16236	8.11723	7.0168	6.55818	7.19511	7.51234	7.68403	6.81255	6.89606	8.12076	8.14814	6.32588	7.91648	7.52396	7.12137	7.37856	6.84791	8.0247	5.97029	6.94054	7.04938	7.09825	6.79144	7.03485
PRKRA|8575	5.32677	5.88516	5.17672	5.57128	5.59606	5.03354	5.58941	6.43447	5.64404	5.78069	5.9172	5.22757	5.96469	5.20834	4.85472	5.41058	5.94866	6.0521	5.28154	5.3581	4.82009	5.6093	5.64705	6.2817	5.33076	5.59892	6.05808	5.21625	6.46902	5.62218	5.84724	5.46077	5.86729	6.18673	5.39757	5.72099	5.61099	6.01537	5.3291	5.4801	5.76853	5.92045	5.79218	5.44638	5.78585	5.99852	5.25592	5.59586	5.1479
CHP|11261	6.30526	6.61068	6.66517	7.70891	6.55897	6.6898	7.56452	6.63952	7.53273	7.23206	7.62445	7.62127	6.76294	6.83681	7.87992	7.06361	7.36326	6.34301	7.13442	7.35646	5.82971	6.82507	6.94813	7.95244	6.749	6.48896	7.05423	7.33162	7.69817	7.47803	7.15361	5.99328	6.84108	7.47848	6.53349	6.58809	6.33682	7.06758	7.06342	6.70675	6.82195	6.75722	7.33552	7.22556	6.6456	6.46568	5.8922	6.39599	6.59894
POLR2H|5437	5.61163	6.01251	6.54381	6.01892	6.79587	6.8166	7.11969	8.02349	6.93628	6.60335	6.16581	6.90247	6.72717	7.31852	6.03121	7.07153	8.53036	7.06915	6.32116	6.8919	6.26226	6.74942	6.00573	7.08849	6.87806	7.27698	6.09307	6.40092	6.93042	6.47406	7.49674	6.66076	6.92699	6.02616	5.83535	5.78508	6.99608	7.2935	6.43183	7.00789	6.71217	6.37806	6.00587	6.42053	7.24514	6.58241	7.18523	6.56749	6.43703
GLOD4|51031	4.70298	5.28253	5.254	6.45598	5.69477	5.68752	5.29073	4.52385	5.46596	5.14647	5.47206	5.08071	6.23002	6.53641	5.46872	5.12889	5.56409	5.41429	5.10675	5.15772	5.13316	4.91797	4.72063	5.53761	5.12993	5.45136	5.38299	5.4814	5.90104	5.80104	5.31874	5.27443	5.67778	5.1259	5.8419	5.40321	5.38253	5.80019	5.65231	5.75608	5.51611	6.30759	5.90073	5.01647	5.62009	5.71293	5.58643	5.78703	5.14482
ADPGK|83440	4.49241	5.09036	4.89653	5.35465	5.41277	5.40376	4.9068	4.89074	4.69172	4.48124	5.44941	5.08249	5.44319	5.11587	4.90114	4.83475	5.11617	5.26777	6.47041	5.62419	4.5527	4.55898	4.52892	4.83385	5.08133	4.70023	4.91313	5.72495	5.16185	4.98146	5.48915	5.02359	5.2536	6.06646	4.78166	5.4218	4.46852	6.06525	4.81513	5.0928	4.75651	5.05918	5.06375	5.49725	5.01301	5.07174	5.42563	4.90443	4.85685
C7orf28A|51622	5.52102	5.95062	5.83688	5.67255	5.63584	5.97758	5.78033	5.08256	5.73256	6.05452	7.3012	5.39811	5.81194	5.50925	6.04432	6.00392	6.05421	6.47201	6.43415	6.54187	5.11239	5.06283	5.79733	6.51903	5.93795	6.21711	6.41061	5.77231	6.50344	5.88406	6.18866	5.78306	6.35132	5.66014	6.08646	6.2076	5.81577	6.38726	6.53768	5.99068	6.07472	5.9471	5.73111	5.19242	5.93789	6.71914	5.83497	5.87707	6.14832
CPSF3|51692	5.41963	5.84081	5.62815	5.28484	5.54708	5.63376	6.25317	5.66234	5.85623	5.89488	5.57196	5.4404	5.8875	5.30364	5.6675	5.70646	5.66733	5.84472	6.24567	5.63992	5.44311	5.54577	5.72917	6.08962	5.62297	6.48212	6.78679	5.23708	6.65434	5.33823	6.57002	6.02826	6.89037	6.0114	5.29809	5.48987	5.50868	6.08781	7.28885	6.03408	5.50375	5.89315	5.44949	5.67203	6.74895	5.76127	5.59513	6.06819	5.62389
WIBG|84305	4.88672	5.9523	5.50669	5.28827	5.3553	5.73503	5.80569	5.95831	5.96894	5.58398	5.6991	5.99241	6.34757	5.22547	5.33347	6.26444	5.1799	5.78802	5.18491	5.65421	5.5909	6.70133	5.86334	5.36423	6.5225	6.31442	5.87869	5.91435	5.32733	5.34966	5.70357	6.67291	6.23127	4.8094	4.62466	5.82662	5.93431	5.96621	5.61495	5.39235	6.02637	4.99295	5.9329	5.89178	5.39673	5.79109	5.66669	6.23573	4.77693
TFG|10342	6.53628	6.49431	6.77144	7.2559	6.81745	6.91994	7.8271	6.94471	6.80916	5.94103	6.64267	7.15278	7.22984	7.22063	7.08975	7.66894	7.19735	8.23225	6.58058	8.23379	6.9536	7.24356	6.57069	7.37151	6.58903	6.72492	6.34698	7.28168	7.55356	6.70466	7.1963	7.61852	7.50525	8.26377	7.49903	7.00461	7.64602	8.10499	5.7916	7.09634	7.0794	7.2996	7.40693	6.58369	7.91954	7.46927	6.72704	7.36028	7.2586
NDUFA13|51079	7.10486	7.06639	7.48912	6.80453	6.85873	8.43952	8.38934	7.69472	7.26003	8.54332	7.52242	8.00314	7.55723	7.37971	8.34412	6.82596	7.52957	7.41046	7.63667	7.34257	7.44958	7.14006	6.77667	7.32505	7.34853	7.20701	6.27997	7.77716	7.01954	7.51027	6.89891	8.44575	7.36394	5.62156	7.23564	7.30666	7.55859	6.95746	7.7464	7.3953	7.26292	6.60308	8.12484	8.8726	6.99256	7.22529	7.39264	8.03229	7.60458
HARS|3035	4.90617	6.05247	5.40019	5.00144	5.23976	5.93746	5.98277	5.71646	4.87584	5.46269	5.98158	5.51416	6.02738	6.41993	6.1995	5.30709	5.72016	5.23357	6.36553	5.97187	5.9015	5.48113	5.49576	6.8719	6.16644	6.10547	5.72778	5.29459	5.45611	5.45334	5.66103	5.44615	7.07107	5.13446	4.2137	5.86146	5.61754	5.20744	5.44387	5.5537	6.20796	5.41976	6.00472	5.98754	5.14914	5.453	5.87848	6.26382	5.79282
TMEM115|11070	4.94788	4.87983	5.54505	4.81917	4.98495	5.34944	4.80788	5.72139	4.86048	5.33997	5.4438	4.84322	4.78185	4.66897	5.09905	5.32968	5.52432	4.20124	5.27756	4.58936	5.5674	5.60791	4.9888	4.78423	5.36475	4.60508	4.8585	5.37993	5.24442	4.69537	5.01399	5.26516	5.0407	4.62098	4.74805	4.83788	4.97621	4.90438	5.14486	4.9694	5.06109	4.9893	5.54404	5.12382	3.73471	4.97037	5.1716	5.17071	5.83658
CAPN1|823	6.23471	6.86269	6.71248	7.07112	6.3048	6.55551	6.71201	6.6577	6.87472	6.6777	7.23599	5.87556	6.32959	6.63989	6.62344	6.63735	7.56884	7.27435	7.86552	6.70671	7.32308	6.86786	7.83807	7.11134	6.45664	5.89966	7.88599	6.375	7.93483	6.89516	5.99108	6.65002	7.07572	6.67108	6.4118	6.48431	6.94836	7.63206	7.7851	6.7234	7.18472	6.57459	6.59842	7.48043	7.09962	6.81043	6.52048	6.5194	7.33432
TAF7|6879	6.0181	6.51341	5.52603	5.83234	6.32309	7.17044	7.33745	5.93823	5.76936	6.22917	6.20213	6.21485	7.07062	7.49335	6.84798	6.64902	6.72179	6.45969	6.52912	6.84949	6.10095	6.96479	6.47991	6.89981	6.5457	6.51932	7.65269	5.9366	6.58283	6.63347	6.51388	6.46406	6.21501	6.74548	5.92053	7.2044	6.84215	6.17993	6.48819	7.10471	7.06754	5.5852	7.46548	6.53956	6.67707	7.14111	6.73017	6.72276	6.3647
USP34|9736	5.62672	6.39413	5.6067	5.79969	5.90424	5.7672	5.81756	5.7765	5.07824	5.47011	6.11982	5.41784	6.46881	5.8675	5.78487	6.20898	6.64356	6.36038	5.51335	5.77117	5.44605	5.77268	5.93896	5.71651	5.68064	6.16959	7.01967	5.4865	6.50557	5.68179	6.25218	5.5026	6.85923	6.40826	5.57663	6.09223	5.31158	6.05723	5.91887	6.02707	6.02195	6.0837	6.05885	5.64391	6.62861	6.35356	6.01316	6.12763	5.64797
DNAJC7|7266	5.51567	5.64597	6.20961	6.92218	6.1338	5.83178	6.1001	5.88707	6.0138	5.38834	6.46032	8.35104	6.96145	5.71767	6.65274	5.36994	6.21407	6.10649	6.27625	5.53028	5.86132	6.77094	5.7535	6.20442	6.19438	6.50961	6.33989	6.09648	6.41225	5.82953	6.30465	5.99653	6.12763	5.57187	5.94507	6.69631	5.58617	6.1762	5.74399	5.84163	6.13146	5.96572	5.85283	5.66165	6.33134	6.89595	6.38	6.27449	5.82734
CHMP2A|27243	7.29416	7.76717	7.67755	7.41014	7.12375	8.07799	7.96412	8.01638	7.61184	8.78529	7.68605	7.57441	7.91179	7.49901	8.23981	7.901	7.71916	7.19018	7.01443	7.9477	9.07632	6.72105	7.6059	8.06189	8.59112	7.92352	7.4851	7.44428	8.08544	7.16207	7.04201	8.55216	7.19048	6.12379	7.49494	6.96825	7.71935	7.54554	7.75341	7.86266	7.87269	6.99783	8.09336	8.38902	6.10523	6.93447	7.67106	8.86007	7.86807
RDBP|7936	5.87385	5.77912	5.88178	5.60197	5.78663	6.78792	6.05561	6.11634	6.10309	6.18287	5.93693	6.25626	6.1473	6.71662	6.41939	6.45761	5.99612	5.56948	6.119	6.81981	6.44279	5.47606	5.95149	6.24498	6.34274	6.83028	5.63435	5.66944	6.04649	5.9073	5.87023	6.6437	6.45474	4.97501	5.44315	6.43981	6.6667	6.90214	6.14927	5.99649	6.24232	6.51257	6.04967	6.87787	6.39687	5.88017	6.64177	6.51494	5.02375
MTX2|10651	4.73539	5.22719	5.0669	5.52063	5.39513	5.31544	5.85889	6.08694	5.46904	5.02978	5.8089	5.56849	5.8118	5.6137	6.22004	5.13948	6.06186	5.33093	5.33886	5.16846	4.63398	5.48187	5.41783	5.63695	5.01065	5.30224	5.80822	5.29893	6.14472	5.91298	5.56028	5.65918	5.74712	5.85307	5.17119	5.83017	5.3049	5.43497	5.3912	5.80909	5.57166	5.40947	5.4307	5.44975	4.76391	5.29542	5.55971	5.3111	5.22476
RAB5B|5869	6.64583	7.57894	6.47887	6.69284	6.59056	7.46496	7.02825	6.79425	6.69238	6.4374	7.51576	6.05281	7.6297	7.17234	6.55305	7.50697	7.27418	6.93163	7.12828	7.20174	6.64174	7.77011	7.461	7.2038	6.77369	6.61396	7.52969	6.44769	6.69443	6.88235	6.8593	7.10083	7.40149	7.40611	6.93009	6.99829	6.80834	7.51644	6.36745	6.91323	7.67806	6.85266	7.19143	6.66193	6.56658	7.47949	7.02536	7.10039	6.24997
RBM4|5936	6.56681	7.37913	7.15485	6.83885	7.37852	8.77474	7.39781	8.17066	6.89599	7.52351	7.57706	7.41202	7.11259	7.63739	10.0239	7.62344	8.00355	7.36877	7.41909	6.83619	7.76196	7.72264	8.7215	7.69633	7.74463	7.60558	9.80116	7.28971	7.06284	7.12192	8.20712	7.23776	7.4016	7.86999	6.6218	7.00868	7.41753	7.768	8.20955	8.65677	7.51221	7.34485	7.91535	8.07545	7.018	8.04506	7.93659	7.66186	7.93543
EIF1B|10289	5.17584	5.50953	5.39828	5.70238	5.73929	5.51488	6.0451	5.11694	5.36817	5.52137	5.70483	6.02387	6.19593	5.80126	5.74403	5.79106	5.9714	5.46829	5.76858	5.48302	6.00592	5.47841	5.68283	5.41453	5.71747	5.85318	5.71422	5.53216	5.50411	6.19059	5.69279	4.79462	5.86119	6.56459	5.65861	5.06032	5.81899	5.61617	5.61403	5.66178	5.80044	6.35291	5.34417	4.74572	5.73585	6.06105	5.59677	5.53817	5.84873
PEA15|8682	7.68733	7.59101	7.17283	7.89624	7.4263	7.78367	7.32911	7.58345	7.38777	7.6332	7.95023	7.67272	7.8393	7.19688	7.3643	7.82093	7.31772	8.56131	7.83888	8.13239	7.16907	8.00496	7.55061	7.24193	7.99495	7.35031	6.90146	7.48069	8.86613	7.80871	8.73536	8.03987	7.69885	7.21099	7.78568	8.40826	7.10924	7.83749	6.71497	7.25736	7.72679	8.31078	7.64344	7.21246	6.48233	7.12488	7.87502	8.05587	7.85489
SCAMP3|10067	6.19324	6.09984	7.45799	6.95257	6.99317	7.9362	6.45959	7.04373	7.01029	6.45087	7.03885	6.59992	7.02411	7.15826	7.34118	7.38785	6.49235	7.49449	6.68615	7.01262	6.25087	7.24676	6.72614	6.31129	5.99707	6.21528	7.2944	6.31341	7.32835	6.45517	6.30352	7.37662	6.98836	7.04959	6.8761	6.19904	6.71372	7.87127	5.77941	7.48068	6.35158	7.35367	6.15534	6.42883	6.07792	6.46825	6.73355	6.12873	6.48239
ACTR3|10096	7.52169	7.8202	7.23782	7.98085	7.61874	6.706	8.15501	7.0965	7.43018	7.27667	7.82041	7.06974	7.55176	6.82393	7.73758	7.12107	7.93224	7.48193	7.32521	7.69473	6.84658	8.07886	7.27158	7.42458	7.04482	7.27796	7.45758	7.29885	8.3788	7.95777	8.17919	7.1476	8.0996	8.75867	7.36496	7.8196	7.70514	8.07124	7.86955	7.36862	7.50314	7.97968	6.82369	7.64982	8.48687	8.09571	7.47877	7.93759	7.38049
RUVBL2|10856	5.95763	6.29993	6.4616	5.80876	6.30463	6.90848	6.75108	7.02582	7.2807	6.52234	6.44292	6.30454	6.76485	7.30421	6.61385	6.7413	6.96659	6.74355	6.57491	6.58713	8.07974	5.8542	7.0045	7.00647	8.20619	6.50408	6.06762	5.97842	5.98264	6.75747	6.17655	6.10738	6.80238	4.93629	5.41647	5.59205	6.71268	5.72016	7.06488	6.55885	6.82245	6.29934	6.76602	7.0107	6.11013	6.15192	7.00405	6.00248	6.82831
DDX41|51428	4.86961	5.60372	5.61153	5.7765	5.514	6.59627	6.09159	5.47133	5.76458	5.15794	6.07039	5.90278	5.38605	6.24765	6.06229	5.49717	5.85401	5.13892	6.72066	6.32313	6.44546	5.82869	5.426	6.16026	5.69547	5.65089	5.46902	5.43432	6.33282	5.21215	5.22782	5.68535	6.49948	4.99124	5.26296	5.87315	5.77242	5.85652	5.96325	5.85274	6.13693	5.34931	5.76104	6.09647	5.75341	5.17641	5.69814	6.51405	5.76725
ARF6|382	6.3329	6.3181	6.05936	6.95889	6.00904	7.11533	6.84415	5.63316	6.37274	5.85195	6.46503	7.16983	7.01126	6.47207	6.48222	6.47394	6.36859	5.74697	6.93765	6.24744	6.50278	6.52889	6.18435	6.60603	6.18356	6.44401	6.83308	6.16274	5.86501	6.73271	6.32374	6.47547	8.32078	7.26775	6.23672	6.31261	6.53839	6.01249	6.57226	6.63156	6.84479	6.80718	6.04765	5.74852	6.07452	6.87162	6.27469	6.06862	6.48806
ZMAT2|153527	6.04506	6.99519	6.53116	6.05979	6.72264	6.9998	7.05359	6.39849	5.89998	6.0218	5.81246	6.4739	6.83112	6.84285	6.81914	6.42562	6.52718	5.89126	6.83433	7.06027	5.92856	6.48204	6.55844	6.78223	6.6753	6.43833	6.93364	5.71148	6.36367	6.1384	6.52907	6.56966	8.01224	6.68725	5.88801	6.60081	6.73744	6.6633	6.73226	6.7791	7.11789	5.67184	6.28684	6.30562	6.70857	7.37861	6.97078	7.16037	6.42194
ST13|6767	7.64966	7.02738	6.8822	7.05718	6.99185	8.05438	7.8295	6.75221	7.20192	6.57362	6.913	6.06936	7.26565	7.49388	7.28819	7.3825	8.50479	7.31218	7.04234	7.616	7.74648	7.20765	7.24734	7.62464	6.04016	7.07608	7.53355	6.51605	7.18868	7.28789	7.20545	6.07913	6.66913	7.67779	7.24974	7.31193	7.16371	6.79519	6.66482	7.17652	7.14356	7.48637	7.8672	6.2079	7.8637	7.36151	6.64214	6.88313	6.63447
LASS5|91012	4.61614	5.45728	5.0443	4.57973	5.01073	4.70446	5.03281	5.03326	4.91654	4.59852	4.95724	3.59489	5.35579	4.94626	4.216	5.3712	5.16926	4.8444	5.26976	5.16569	5.10197	4.88413	5.35014	4.76371	5.37864	5.08086	5.23843	5.03806	5.06466	5.06886	4.89378	5.16519	4.91376	5.57286	5.56521	5.76265	4.63174	5.2321	4.91778	5.40194	5.21582	4.93931	5.64293	5.15375	5.25433	4.97289	5.38669	5.57139	4.41426
PRDX3|10935	7.05913	7.68024	7.56975	7.72751	7.44532	8.00757	7.23882	6.56111	7.39215	7.69122	7.33001	6.77357	8.52884	8.69546	7.37131	7.7465	7.83489	6.86936	6.76281	7.68274	8.32682	7.41886	7.37384	9.04981	7.02762	8.36813	8.00398	7.10102	7.32144	7.63925	7.88558	6.71663	7.09692	7.30982	7.65001	7.50565	7.57526	7.75888	6.62187	7.95486	7.9049	7.64826	7.97806	7.62826	7.3722	7.81229	7.94583	7.82113	6.73125
C16orf58|64755	5.86356	6.09754	6.04356	5.77023	5.98754	6.85546	6.04193	5.88899	5.91955	5.64127	6.36037	6.79513	6.59453	5.94262	6.07463	6.6094	5.99264	6.1261	6.73542	6.65215	6.02901	6.40187	6.34283	5.53559	6.15402	5.51158	6.15682	5.50345	6.76911	5.05167	5.9237	6.6421	5.85477	5.53887	6.27908	6.10724	6.03571	6.66337	6.99697	6.4118	6.29433	6.35427	6.32842	6.1145	5.7811	4.80746	6.35504	6.9792	6.47065
NDUFS6|4726	6.68463	7.89629	7.39338	7.43625	6.98528	7.54426	8.18749	7.93182	7.60665	8.9541	8.63401	8.18342	7.69944	7.02715	7.97281	7.3233	7.98434	7.62894	8.28678	8.00228	7.97397	7.59142	8.40905	7.76657	7.51258	7.69607	7.36692	7.02146	7.56085	7.49473	7.07714	8.66518	7.50293	5.11226	6.42432	7.83252	7.78202	7.77325	8.94743	6.94665	7.63698	7.34466	7.91825	8.51903	7.75007	6.89824	7.6438	8.20174	7.88755
SERPINH1|871	7.71678	7.62883	7.29159	7.10451	7.52486	7.57564	7.5671	8.21027	7.674	7.38186	7.70572	6.68353	7.99944	7.04158	6.36733	7.61859	7.5531	7.95065	8.56247	8.327	8.65228	7.57261	7.81638	7.92483	8.23959	8.41542	6.61099	7.79679	6.56176	7.57995	7.95654	8.19901	8.06993	7.23193	7.20861	7.52952	7.68591	9.15621	7.60735	7.30828	8.59971	7.7819	7.79852	8.73011	7.4383	6.6986	7.80022	9.13832	7.98389
TIMM17A|10440	6.50653	5.96843	7.18207	6.8279	7.00789	6.88349	6.95058	6.17431	6.68175	6.08078	6.94304	6.76695	7.22108	7.20405	6.73689	6.63691	6.16516	6.87724	6.80279	5.48513	5.71403	7.28748	6.30702	6.56892	5.31611	6.75051	6.54875	6.23581	6.43797	6.9173	6.4311	6.32912	6.41657	7.07302	6.38868	6.42818	6.32713	6.91161	5.74185	7.11213	6.43304	7.218	6.30631	5.83284	6.55903	6.7003	6.11578	6.44802	6.16214
TRIAP1|51499	4.51159	4.68097	4.97574	5.43221	5.71748	5.36366	6.26274	5.30902	5.6186	4.93294	4.91713	5.3223	5.3743	6.56792	5.39491	4.93872	5.71636	5.7679	5.46495	5.44359	5.40423	5.1153	4.96661	5.70433	5.42535	5.8212	6.04697	5.44841	5.32183	5.26448	5.273	5.28328	5.59387	5.75353	5.17389	5.01973	4.79479	5.60179	5.2508	5.94258	5.32958	5.36772	6.43465	5.54733	6.0512	5.57254	5.62397	5.47259	4.93921
WDR45|11152	5.30896	5.42132	4.75074	5.54613	4.81696	6.22715	5.78032	5.55551	5.2905	4.92107	6.10987	5.53566	5.67601	5.54323	5.94188	5.59229	6.17872	5.23011	6.9201	6.1995	5.27232	5.39343	5.02664	5.52833	5.47895	5.36746	5.24737	5.29365	5.54711	5.06024	5.31117	5.75666	5.43508	4.76443	5.7068	5.30786	5.25876	5.89698	5.30961	5.37139	5.83789	5.96443	5.94524	5.43819	4.36165	5.09387	4.95657	6.20281	5.91191
SDF4|51150	6.43237	6.82457	6.07381	6.54322	5.5379	6.6966	7.34851	6.91958	6.14448	6.84081	7.40544	6.74999	6.36374	5.75418	6.482	6.79015	6.58873	6.71993	6.66252	7.27173	6.99223	5.90245	6.63532	6.77381	6.25478	6.28416	5.71574	7.00286	7.26844	6.54187	5.89648	7.18045	6.8005	4.50831	5.5928	6.92706	6.2454	6.66188	7.02537	6.41755	7.12525	6.41187	6.69432	7.27423	6.51813	6.28563	6.40508	7.00451	6.43008
FBXO18|84893	5.12841	5.305	5.07393	5.5617	5.21447	5.42411	4.47559	4.66274	5.09965	4.64038	5.7584	4.7151	5.64846	5.47131	5.11419	5.46444	5.29693	5.65132	6.10957	6.18191	4.8957	5.29295	5.207	5.10756	4.79458	5.22819	5.1616	5.18813	5.21224	4.82918	5.34378	5.11409	6.04635	4.62574	5.11521	5.41918	4.80164	6.69774	5.17524	6.16832	5.53331	4.85962	5.8799	5.01752	5.04928	5.71377	5.59728	5.4358	5.7545
RPL26L1|51121	4.41398	5.38024	4.97765	5.51264	5.48263	5.18655	6.13629	5.63975	4.68146	5.41784	6.3054	6.27688	5.43372	5.61176	5.58745	4.86428	5.49843	4.63592	5.5302	5.66564	5.44541	5.77891	5.48691	5.72512	5.57341	5.77332	6.06765	5.00004	5.77639	5.18446	5.6864	4.69321	5.84125	5.57267	5.49505	5.68775	5.29432	5.47131	5.85714	5.90388	5.79786	4.89763	5.58188	5.73103	5.91736	5.12133	5.7341	6.19696	5.58096
VAMP3|9341	5.81399	6.77347	5.61029	6.61145	6.05155	5.58283	6.47931	5.75382	5.92789	5.97639	6.69238	6.09283	6.66872	6.12069	6.3438	5.78096	5.94664	5.77735	6.28695	6.13724	6.26829	5.64454	6.04179	6.65057	5.59581	5.99085	6.44091	5.84897	6.8793	6.11933	6.05847	6.19815	6.79819	6.73852	6.09038	6.6315	5.41843	6.53657	5.94478	6.944	6.45048	6.64223	5.23164	6.00335	6.32605	6.31597	5.72953	6.30311	6.25415
ACO2|50	7.2557	6.66147	6.06872	6.37137	5.74718	6.35247	7.37554	6.37911	6.41135	6.07373	6.7089	6.36462	6.45226	7.15649	7.70823	6.51126	6.8223	6.30436	7.31038	6.41078	6.56721	6.36141	6.20746	7.00021	5.07029	6.76416	6.58883	6.45692	6.98724	6.38862	6.12482	5.98795	6.14286	5.47284	6.38232	6.93087	6.95157	5.80551	6.69969	5.89871	6.30202	6.75166	7.19636	6.53809	6.3381	6.0146	6.34177	5.76722	6.25129
PPP1CA|5499	6.85634	7.67351	7.52525	7.06171	7.17227	10.0892	7.34922	7.60619	7.65175	8.1364	7.77231	7.89713	6.91212	7.67174	7.9789	7.14229	8.00883	8.40736	8.28203	9.69554	8.31994	7.40788	7.93652	7.76129	8.99733	8.07081	9.99649	7.39183	7.6628	7.73077	7.94551	7.44833	7.59195	7.1178	7.42094	7.45356	7.68277	7.66634	8.885	10.1746	7.83492	7.92915	7.69587	7.98498	7.19175	8.32132	7.97292	8.11783	7.85051
ANXA7|310	6.95075	7.30464	6.48304	8.67212	8.16492	7.33191	6.81489	6.7627	7.43295	6.85897	7.11792	7.59648	7.78737	6.38641	7.14753	7.1327	7.04936	6.80457	7.3755	7.8458	7.18072	6.91006	6.77549	7.86727	7.22687	7.00217	7.6928	6.70011	6.91135	7.32453	7.33591	7.77669	7.70504	7.71413	7.64314	7.02869	6.79745	7.75445	6.88671	7.43482	7.48318	7.19012	7.69659	7.01244	8.90443	7.13506	8.01472	7.33039	6.97692
TXNDC11|51061	5.37957	5.34131	4.79313	5.73996	5.11521	4.87337	4.94702	4.67983	5.01417	4.63489	5.02542	5.70446	5.48641	5.2621	5.48827	5.43159	4.5944	5.57809	5.08109	5.36048	4.91686	5.44968	5.27281	4.57882	5.31709	5.16615	5.23945	5.87342	5.98448	4.95951	6.0246	5.42658	5.45763	5.39966	5.81337	6.40218	5.22607	4.88175	5.25907	5.0601	5.31897	5.5717	5.84079	4.58945	5.48808	5.70455	5.27603	5.26088	5.65179
ARAF|369	5.35359	5.70174	5.89943	5.57807	4.99657	6.81949	5.44053	4.56311	5.13857	5.11208	5.9243	5.46442	6.01632	5.73623	5.89193	6.11718	5.72536	6.10821	6.25553	5.54705	5.54843	5.42461	5.82203	5.28915	4.58178	5.13197	5.85946	5.10869	5.94036	5.45304	4.81992	5.42991	6.36303	5.82266	5.5491	5.97168	6.176	5.54911	5.55694	6.22785	5.39392	5.90453	5.75685	4.79354	5.36693	5.15707	5.47959	5.53997	6.16311
SSR3|6747	6.90248	6.65326	6.73282	6.90239	6.88522	6.40153	8.16925	6.57082	7.33898	6.27248	6.87877	6.7031	6.6085	7.06169	7.11753	6.78703	6.80593	7.54416	6.8158	7.43601	6.59572	7.41304	6.60313	6.59559	5.66675	6.67314	6.19774	7.02404	6.82134	6.53073	7.23071	6.46704	7.09259	7.73745	7.07319	6.84463	6.96768	7.5381	5.6976	7.23558	6.55299	8.29973	7.0724	6.46906	7.39228	7.24902	6.55814	6.9842	6.67164
[truncated: 2,373 more rows]
[truncated: 36 more columns]
